# Supplementary material for: Mechanistic details of the cobalt-mediated dehydrogenative dimerization of aminoquinoline-directed benzamides
Source: Royal Society of Chemistry journal article supplement (doi:10.1039/d0sc02066d), 2020-01-01
Supplement: d0sc02066d1.pdf [file d0sc02066d1.pdf]

1. Geometry and spin density analyses of the transition state **TS1** and intermediate **B** (“**t**” stands for triplet, and “**q**” stands for quintet)

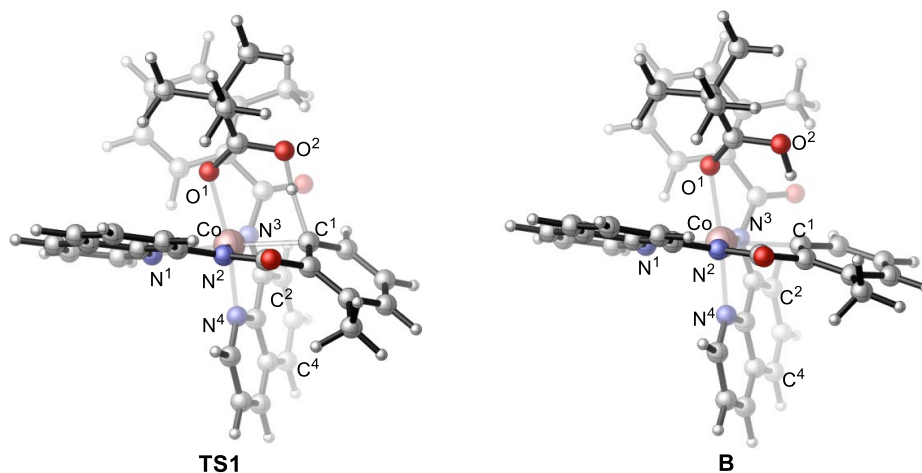

|            |         | spin density ( $ e $ ) |                |                |                |                | bond distances ( $\text{\AA}$ ) |                   |                   |                   |                   |                   |                   |                   |
|------------|---------|------------------------|----------------|----------------|----------------|----------------|---------------------------------|-------------------|-------------------|-------------------|-------------------|-------------------|-------------------|-------------------|
|            |         | Co                     | N <sup>3</sup> | C <sup>1</sup> | C <sup>2</sup> | C <sup>4</sup> | Co-N <sup>1</sup>               | Co-N <sup>2</sup> | Co-N <sup>3</sup> | Co-N <sup>4</sup> | Co-O <sup>1</sup> | Co-C <sup>1</sup> | O <sup>1</sup> -H | C <sup>1</sup> -H |
| <b>TS1</b> | triplet | 1.90                   | -0.01          | -0.09          | 0.02           | 0.02           | 2.03                            | 1.90              | 2.00              | 2.17              | 2.19              | 2.14              | 1.36              | 1.29              |
|            | quintet | 2.66                   | 0.41           | 0.15           | 0.26           | 0.28           | 2.18                            | 2.05              | 2.10              | 2.12              | 2.16              | 2.28              | 1.13              | 1.53              |
| <b>B</b>   | triplet | 2.00                   | 0.01           | -0.18          | 0              | 0              | 2.03                            | 1.90              | 2.00              | 2.17              | 2.19              | 2.14              | 1.36              | 1.29              |
|            | quintet | 2.75                   | 0.21           | 0.53           | 0.10           | 0.09           | 2.14                            | 2.11              | 2.04              | 2.10              | 2.21              | 2.28              | 0.99              | 2.00              |

**Figure S1.** Geometry and spin density analyses of the transition state **TS1** and intermediate **B** (“**t**” stands for triplet, and “**q**” stands for quintet)

2. Dimetallic reaction pathway

Since bimetallic catalysis has grown fast in the field of C-C and C-X coupling reactions,<sup>1-3</sup> here, we also investigated the bimetallic cobalt complex mediated reaction pathway (**Figure S2**). The *dimetallic* mechanism starts from the intermediate **B**, but proceeds via the: (a) BQN-to-PivO<sup>-</sup> ligand exchange, (b) dimerization of the resulted (PivO)Co(BQN), **20**, complex to form the (BQN)Co(PivO)<sub>2</sub>Co(BQN), **21**, intermediate, and (c) C-C coupling to form biaryl product.

At first, we have explored the BQN-to-PivO<sup>-</sup> exchange process. We found that it is endergonic by 18.9 kcal/mol indicating that aminoquinoline is a better bidentate ligand than pivalate. The dimerization of **20t** forms the bimetallic species **21** with a quintet ground electronic state (**21q**). This dimerization process is a slightly exergonic because of presence of weak  $\pi$ - $\pi$  interaction between the two aryl rings of substrates. In **21q**, the Co-Co bond distance (3.46  $\text{\AA}$ ) is too long (**Figure S3**), and each cobalt atom has about two (Co<sup>1</sup>: 2.01  $|e|$ ; Co<sup>2</sup>: 1.99  $|e|$ ) unpaired spins.

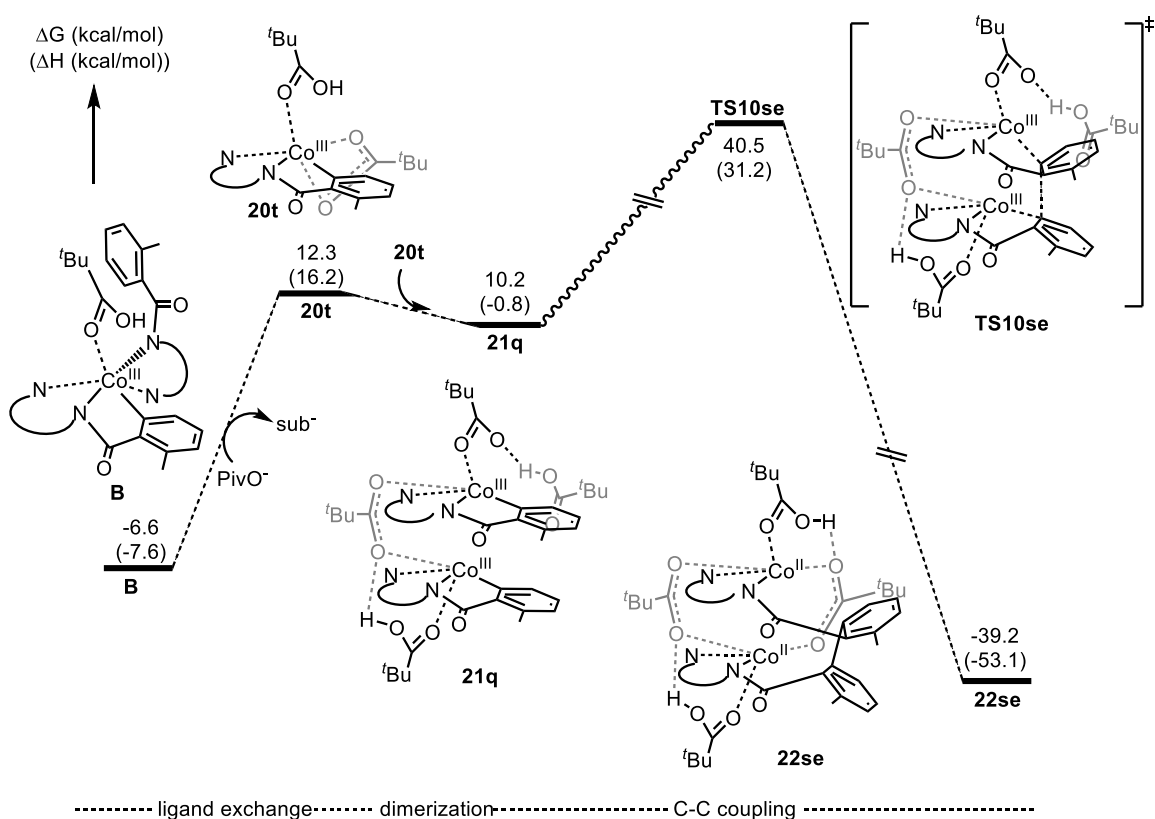

**Figure S2.** Potential energy surface for the *dimetallic* reaction pathway.

In **21q**, the C-C coupling occurs via the transition state **TS10**, where two Co-C bonds are going to be broken and one C-C bond is going to be formed. We located a septet state **TS10**, **TS10se**. Unfortunately, all attempts to locate its other spin states were unsuccessful. Careful examination of the structure of **TS10se** (**Figure S3**) indicates that the two cobalt-carbon bonds are “asymmetric” with a  $\text{Co}^1\text{-C}^1 = 2.36 \text{ \AA}$  and  $\text{Co}^2\text{-C}^2 = 1.97 \text{ \AA}$  bond distances. The “asymmetric” property of Co-centers is also reflected in their spin densities:  $\text{Co}^1$  has a 2.66 |e| unpaired spin, while  $\text{Co}^2$  has 2.16 |e| unpaired spin. The performed IRC calculation from **TS10se** leads to the product, **22se**, with a  $\text{C}^1\text{-C}^2 = 1.51 \text{ \AA}$  bond. This species with the  $\text{Co}^1 = 2.70 |e|$  and  $\text{Co}^2: 2.73 |e|$  spins were characterized as a  $\text{Co}^{\text{II}}\text{-Co}^{\text{II}}$  complex. As seen in **Figure S2**, transition state **TS10se** has a 47.1 kcal/mol free energy relative to complex **B**. This barrier is prohibitively high that enables us to conclude that dimetallic mechanism of the studied reaction cannot be operative.

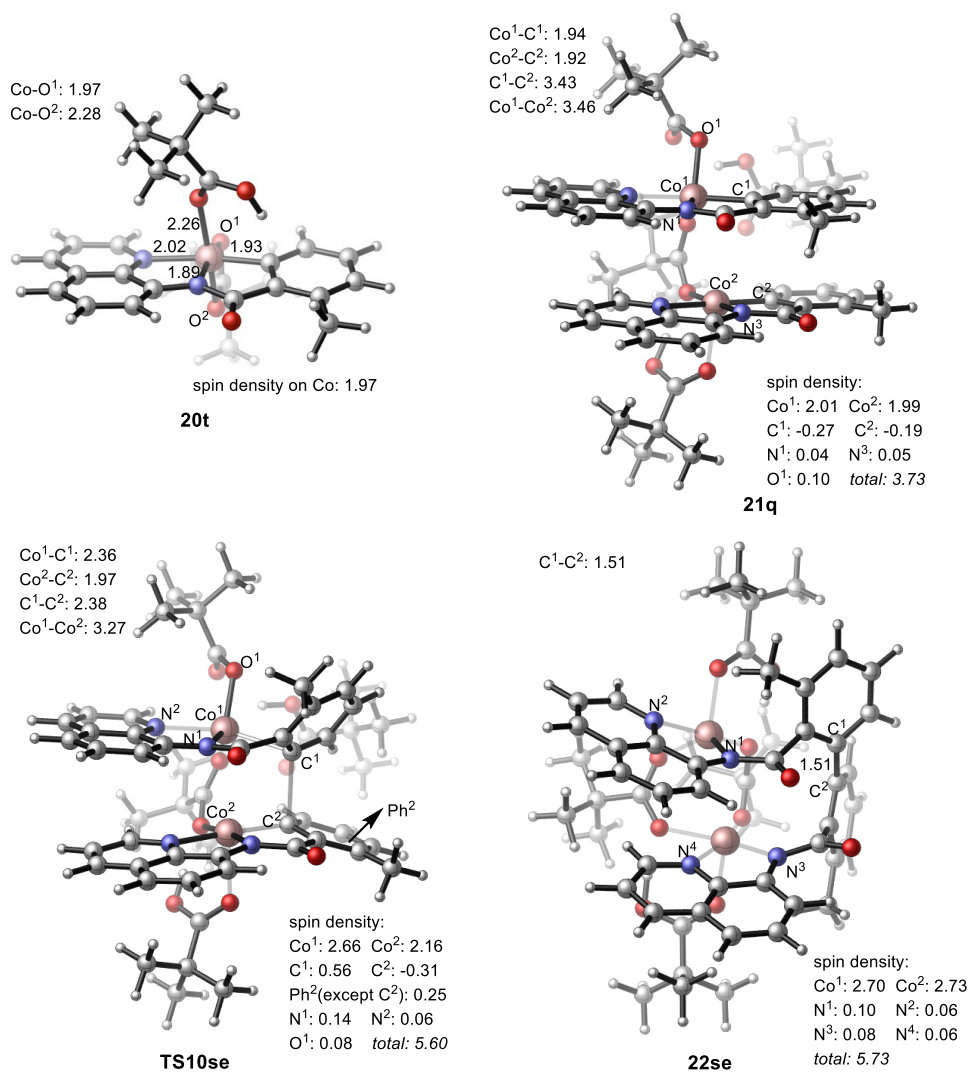

**Figure S3.** Geometries (in Å) and spin densities (in |e|) of the key intermediates and transition states of the dimetallic reaction pathway.

### 3. The second C-H bond activation via the “outer-sphere” mechanism

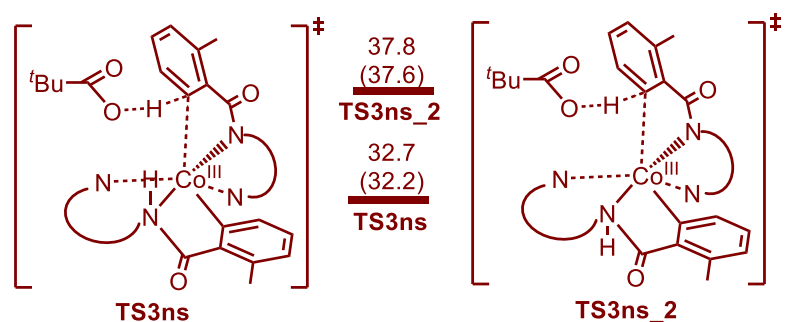

**Figure S4.** The second C-H bond activation via the “outer-sphere mechanism”, transition states **TS3ns** and **TS3ns\_2**.

As it can be seen from Figure S4, transition states associated with the “outer-sphere” mechanism, **TS3ns** and **TS3ns\_2**, are higher in free energy than that associated with the “inner-sphere” mechanism (**TS3**, 26.2 kcal/mol).

4. Potential energy surface for the C-C coupling in the complex **D** via the release of PivOH.

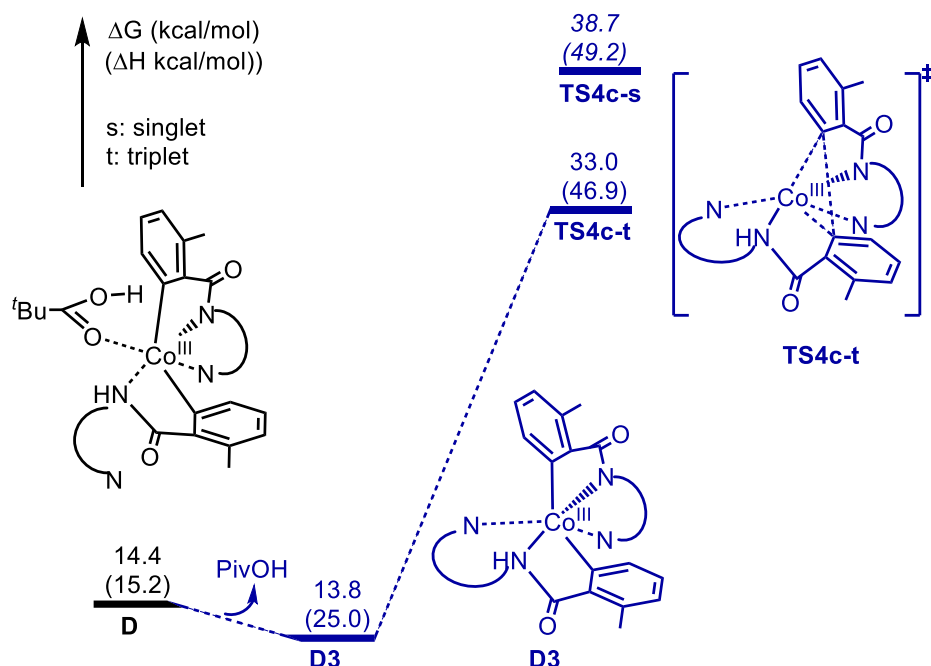

**Figure S5.** Potential energy surface for the C-C coupling in the complex **D** via the release of PivOH.

5. Potential energy surface for the second amide nitrogen protonation and the following C-C coupling.

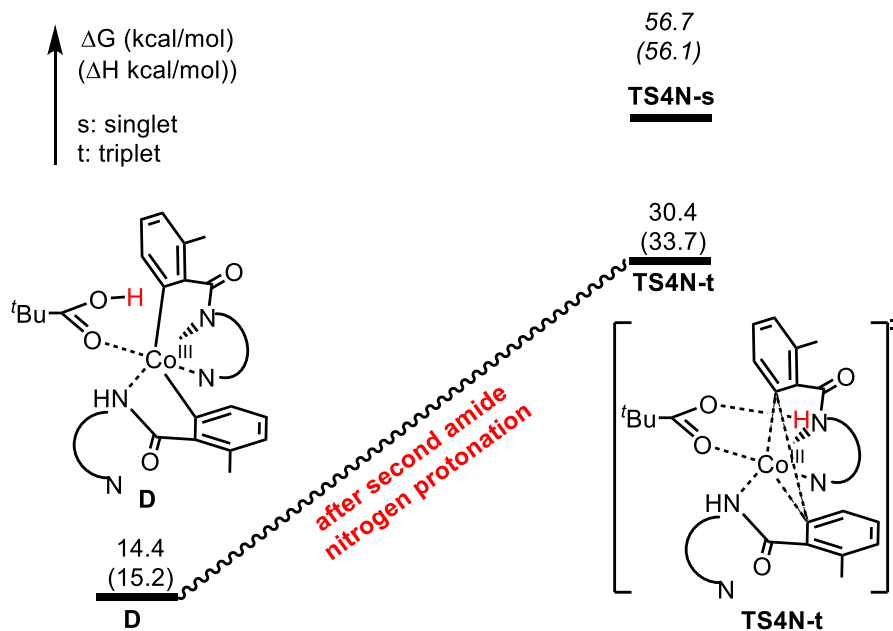

**Figure S6.** Potential energy surface for the second amide nitrogen protonation and the following C-C coupling.

## 6. Computational analyses of the transition states **TS5s** and **TS7s**

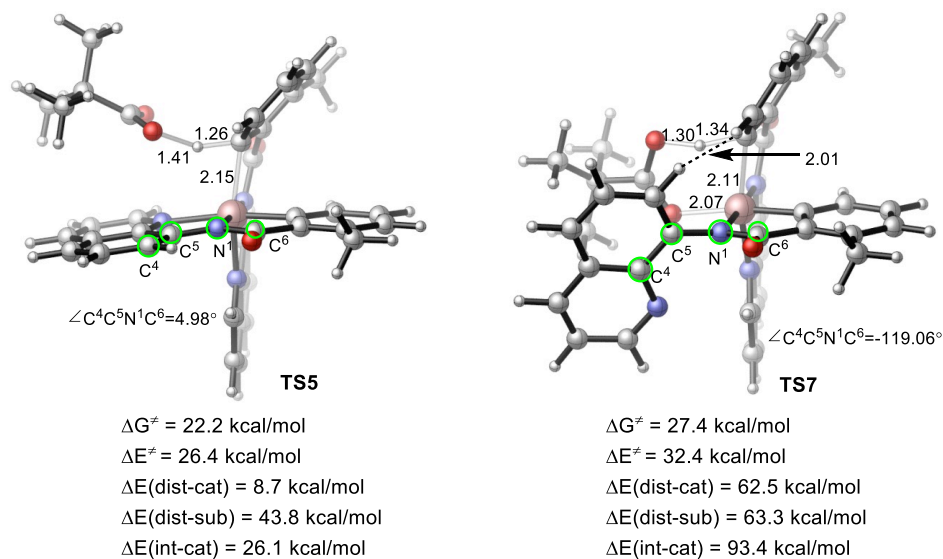

**Figure S7.** Computational analyses of the transition states **TS5s** and **TS7s**

As seen in Figure S7, transition state **TS7** is unfavorable compared with transition state **TS5** for several reasons: (1) in **TS7** the H(quinolone)-H(aryl) distance is only 2.01 Å, indicating that there should be a large steric repulsion between these atoms; and (2) in **TS7** one of the quinolone moiety rotated near vertically to the rest benzamide part ( $\angle C^4C^5N^1C^6 = -119.06^\circ$ ), which interrupted the “global” conjugation of the entire substrate and made it unfavorable (in **TS5**,  $\angle C^4C^5N^1C^6 = 4.98^\circ$ ).

## 7. Synthetic procedures and characterization of cobalt complexes.

Synthesis of 2-methyl-N-(quinolin-8-yl)benzamide. Prepared using a modified literature procedure.<sup>8</sup> A two-neck RB flask was charged with 2-methylbenzoyl chloride (6.52 mL, 50 mmol) and a magnetic stir bar. The acid chloride was diluted with  $\text{CH}_2\text{Cl}_2$  (50 mL) under an  $\text{N}_2$  atmosphere and cooled to  $0^\circ\text{C}$ . A solution of 8-aminoquinoline (7.2090 g, 50.05 mmol) and triethylamine (7.62 mL, 54.5 mmol) in  $\text{CH}_2\text{Cl}_2$  (40 mL) was added dropwise to the acid chloride solution. The mixture was allowed to warm to room temperature and then stirred for 18 h. The reaction mixture was quenched with a saturated  $\text{NaHCO}_3$  solution (7.5 g in 90 mL DI  $\text{H}_2\text{O}$ ) and extracted three times with  $\text{CH}_2\text{Cl}_2$ . The extracts were combined and dried of  $\text{MgSO}_4$  and filtered through Celite® and activated charcoal. Filtrate was dried in vacuo to obtain a light-yellow powder. A crystalline product can be obtained by layering a concentrated toluene solution of the compound with hexanes (10.57 g, 81%).  $^1\text{H}$  NMR ( $\delta$ ,  $\text{CDCl}_3$ , 600 MHz) 10.22 (br s, 1H), 8.96 (d,  $J = 7.6$  Hz, 1H), 8.77 (dt,  $J = 4.1, 1.3$  Hz, 1H), 8.17 (dt,  $J = 8.3, 1.4$  Hz, 1H), 7.71 – 7.67 (m, 1H), 7.60 (t,  $J = 7.9$  Hz, 1H), 7.55 (dt,  $J = 8.3, 1.3$  Hz, 1H), 7.45 (ddd,  $J = 8.2, 4.2, 1.2$  Hz, 1H), 7.40 (tt,  $J = 7.5, 1.2$  Hz, 1H), 7.35 – 7.30 (m, 2H), 2.61 (s, 3H).

**Synthesis of 1 (Co<sup>II</sup>(BQN)<sub>2</sub>).** Under an inert atmosphere, a 20 mL scintillation vial was charged with 2-methyl-*N*-(quinolin-8-yl)benzamine (0.2750 g, 1.05 mmol), potassium hydride (44.5 g, 1.11 mmol), a stir bar, and 10 mL of dimethylformamide. The solution was stirred at ambient temperature for 1 h. To this homogenous dark yellow solution, CoBr<sub>2</sub> (0.972 g, 0.518 mmol) was added as a solid and the solution immediately changed to a deep burgundy color. The resulting homogenous solution was concentrated to dryness under reduced pressure to yield a dark maroon solid. The solid was extracted into a CH<sub>2</sub>Cl<sub>2</sub> and filtered through a plug of Celite®. The solution was layered with petroleum ether and yielded needle-shaped dark red crystals of the product (282.0 mg, 93.7%). This product decomposes slowly in air. <sup>1</sup>H NMR (δ, CDCl<sub>3</sub>, 400 MHz): -21.31 (s), -19.72 (s), -9.67 (s), -8.30 (s), 26.27 (s), 40.06 (s), 42.88 (br), 46.13 (br), 66.08 (s). λ<sub>max</sub>(CH<sub>2</sub>Cl<sub>2</sub>), nm (ε, M<sup>-1</sup> cm<sup>-1</sup>): 617 (190), 590 (288), 535 (316), 400 (6730). IR (diamond ATR, cm<sup>-1</sup>): ν(CO) = 1605 MS (+ESI) calculated 581.14, found 581.14, μ<sub>eff</sub> = 4.41(1) μ<sub>B</sub> (Evans Method, CD<sub>2</sub>Cl<sub>2</sub>, 400 MHz). EA: (C<sub>34</sub>H<sub>26</sub>CoN<sub>4</sub>O<sub>2</sub>)<sub>4</sub> + CH<sub>2</sub>Cl<sub>2</sub> calcd. C 68.25, H 4.43, N 9.30 %; exp. C 68.47, H 4.60, N 9.37 %.

**Synthesis of 2 (PPh<sub>4</sub>)[Co<sup>II</sup>(OPiv)<sub>2</sub>(BQN)].** Under an inert atmosphere a 20 mL scintillation vial was charged with pivalic acid (102.2 mg, 1.00 mmol), (2-methylbenzoyl)(quinolin-8-yl)amide (133.4 mg, 0.509 mmol), potassium hydride (59.7 mg, 1.49 mmol), a magnetic stir bar, and 2 mL DMF. The solution was stirred for 2 h. Cobalt bromide (93.9 mg, 0.500 mmol) was added to the stirring solution and, after 20 min, tetraphenylphosphonium bromide (206.1 mg, 0.492 mmol) was added and the solution was stirred for an additional 12 h. The resulting solution was concentrated in vacuo, dissolved in CH<sub>3</sub>CN, and filtered through a frit to afford a dark green solution. A concentrated solution of the product in CH<sub>3</sub>CN was layered with diethyl ether, which afforded red, block crystals (232.1 mg, 51% yield). Product is stable to air. <sup>1</sup>H NMR (δ, CDCl<sub>3</sub>, 400 MHz): -12.54, -12.25, -11.22, -5.59, -3.51, 7.69, 7.79, 7.90 11.54, 16.70, 32.57, 33.43. IR (diamond ATR, cm<sup>-1</sup>): ν(CO) = 1618, 1588, MS (-ESI) calculated [M-PPh<sub>4</sub>] 522.16, found 522.16, μ<sub>eff</sub> = 4.22(9) μ<sub>B</sub> (Evans Method, CD<sub>2</sub>Cl<sub>2</sub>, 400 MHz). EA: C<sub>51</sub>H<sub>51</sub>CoN<sub>2</sub>O<sub>5</sub>P calcd. C 71.07, H 5.96, N 3.25 %; exp. C 70.79, H 6.21, N 3.49 %.

**Synthesis of 3 (PPh<sub>4</sub>)[Co<sup>II</sup>(OAc)<sub>2</sub>(BQN)].** Under an inert atmosphere a 20 mL scintillation vial was charged with (2-methylbenzoyl)(quinolin-8-yl)amide (130.8 mg, 0.499 mmol), potassium hydride (26.3 mg, 0.656 mmol), a magnetic stir bar, and 2 mL DMF. The solution was stirred for 1 h. Cobalt acetate (87.7 mg, 0.495 mmol) and tetraphenylphosphonium bromide (214.2 mg, 0.511 mmol) were added to the stirring solution and stirred for an additional 12 h. The resulting solution was concentrated in vacuo, dissolved in CH<sub>3</sub>CN, and filtered through a frit to afford a dark green solution. A concentrated solution of the product in CH<sub>3</sub>CN was layered with diethyl ether, which afforded red, block crystals (99.6 mg, 26% yield). <sup>1</sup>H NMR (δ, CDCl<sub>3</sub>, 400 MHz): -14.47, -10.77 -5.18, 7.69, 7.79, 7.90 10.60, 14.97, 33.40, 35.00. IR (diamond ATR, cm<sup>-1</sup>): ν(CO) = 1612, 1582, 1562, MS (-ESI) calculated [M-PPh<sub>4</sub>] 438.06, found 438.06, μ<sub>eff</sub> = 4.21(8) μ<sub>B</sub> (Evans Method, CD<sub>2</sub>Cl<sub>2</sub>, 400 MHz). EA: (C<sub>45</sub>H<sub>39</sub>CoN<sub>2</sub>O<sub>5</sub>P)<sub>3</sub> + CH<sub>2</sub>Cl<sub>2</sub> calcd. C 67.55, H 4.96, N 3.48 %; exp. C 67.71, H 4.74, N 3.61%.

**Synthesis of 4 (Co<sup>III</sup>(H<sub>2</sub>O)(BQN)(BQNN)).** Under an inert atmosphere a 20 mL

scintillation vial was charged with complex 2 (84.8 mg, 0.094 mmol), (2-methylbenzoyl)(quinolin-8-yl)amide (25.3 mg, 0.096 mmol), FcBF4 (55.0 mg, 0.202 mmol), a magnetic stir bar, and 2 mL CH<sub>3</sub>CN. The solution was stirred for 18 h. The solution was filtered through Celite® and concentrated in vacuo. The complex was isolated by column chromatography on silica gel using appropriate eluent (34.8 mg, 62% yield). <sup>1</sup>H NMR (δ, CDCl<sub>3</sub>, 400 MHz): 10.27 – 10.15 (m, 2H), 8.93 (d, J = 7.5 Hz, 2H), 8.76 (d, J = 4.1 Hz, 2H), 8.17 (dd, J = 8.3, 1.7 Hz, 2H), 7.72 – 7.64 (m, 5H), 7.61 – 7.53 (m, 4H), 7.44 (dd, J = 8.3, 4.2 Hz, 2H), 7.37 (t, J = 6.5 Hz, 3H), 7.31 (s, 2H). <sup>13</sup>C NMR (δ, CDCl<sub>3</sub>, MHz): 205.08, 195.50, 168.59, 165.48, 148.28, 147.49, 139.28, 137.73, 136.68, 136.37, 136.16, 134.92, 134.51, 134.41, 131.72, 131.37, 130.32, 129.40, 129.24, 129.09, 128.82, 128.75, 128.52, 128.01, 127.84, 127.55, 127.44, 127.27, 127.12, 126.52, 126.01, 125.32, 122.59, 122.41, 121.91, 121.77, 121.71, 121.67, 121.11, 120.26, 119.15, 118.62, 20.00, 19.71. IR (diamond ATR, cm<sup>-1</sup>): ν(CO) = 1595, 1594, MS (ESI<sup>+</sup>) calculated ([M-H<sub>2</sub>O] + H<sup>+</sup>) 580.138, found 581.137

**Synthesis of 5 (Co<sup>III</sup>(PivO)(BQN-BQN)).** Under an inert atmosphere, a 20 mL scintillation vial was charged with 1 (0.0495 g, 0.085 mmol), silver carbonate (0.2241 g, 0.813 mmol), sodium pivalate (0.0120 g, 0.097 mmol), a stir bar, and 10 mL of CH<sub>2</sub>Cl<sub>2</sub>. The solution was heated to 65°C and stirred for 40h. The mixture was allowed to cool to room temperature and filtered through Celite®. A dark grey solid remained on the Celite® and afforded a dark orange solution. The solution was concentrated to dryness. A crystalline product can be obtained by layering concentrated benzene solution of the mixture with petroleum ether and yielded dark orange block crystals (24.1 mg, 42% yield). <sup>1</sup>H NMR (δ, CDCl<sub>3</sub>, 400 MHz): 8.85 (dd, J = 5.1, 1.3 Hz, 1H), 8.69 (dd, J = 7.9, 1.1 Hz, 1H), 8.32 (dd, J = 8.3, 1.3 Hz, 1H), 7.60 (dd, J = 8.3, 5.1 Hz, 1H), 7.38 (t, J = 8.0 Hz, 1H), 7.26 (dd, J = 8.1, 1.0 Hz, 1H), 6.36 – 6.30 (m, 2H), 6.18 (dd, J = 7.2, 1.3 Hz, 1H), 2.01 (s, 3H). <sup>13</sup>C NMR (δ, CDCl<sub>3</sub>, 600 MHz): 200.44, 178.67, 150.98, 149.34, 147.67, 142.02, 138.42, 136.53, 134.95, 129.77, 127.72, 127.14, 126.76, 124.84, 121.67, 121.25, 117.80, 38.94, 29.72, 27.44, 25.34, 20.57, λ<sub>max</sub> (CH<sub>2</sub>Cl<sub>2</sub>), nm (ε, M<sup>-1</sup> cm<sup>-1</sup>): 530 (873), 426 (8409). IR (diamond ATR, cm<sup>-1</sup>): ν(CO) = 1605, MS (-ESI) calculated 680.18, found 679.54.

**Synthesis of 6 (Co<sup>II</sup>(BQN-BQN)).** Under an inert atmosphere a 20 mL scintillation vial was charged with 1 (0.0467 g, 0.080 mmol), silver oxide (0.1884 g, 0.813 mmol), a stir bar, and 10 mL of CH<sub>2</sub>Cl<sub>2</sub>. The solution was heated to 65°C and stirred for 72h. The mixture was allowed to cool to room temperature and filtered through Celite®. The remaining solution was dried in vacuo. A concentrated solution of the product in benzene was layered with petroleum ether, which afforded small, dark red crystals (17.2 mg, 37% yield). The crystals are stable to air. <sup>1</sup>H NMR (δ, CDCl<sub>3</sub>, 400 MHz): -33.78 (s), -15.05 (s), -13.46 (s), -1.40 (s), 34.84 (s), 45.48 (s), 79.41 (br), 81.26 (br). λ<sub>max</sub> (CH<sub>2</sub>Cl<sub>2</sub>), nm (ε, M<sup>-1</sup> cm<sup>-1</sup>): 393 (11918), 533 (1080), 588 (664). IR (diamond ATR, cm<sup>-1</sup>): ν(CO) = 1597, MS (+ESI) calculated 579.12, found 579.12, μ<sub>eff</sub> 4.13(9) μ<sub>B</sub> (Evans Method, CD<sub>2</sub>Cl<sub>2</sub>, 400 MHz). EA: (C<sub>34</sub>H<sub>24</sub>CoN<sub>4</sub>O<sub>2</sub>)<sub>3</sub> + DMF calcd. C 69.61, H 4.40, N 10.05 %; exp. C 69.31, H 4.48, N 9.61 %.



**Synthesis of 6<sup>OMe</sup> (Co<sup>II</sup>(BQN<sup>OMe</sup>-BQN<sup>OMe</sup>)).** Under an inert atmosphere, a 20 mL scintillation vial was charged with a stir bar, benzylquinolinamide (BQN, 0.200 mmol), KH (0.220 mmol), and 3 mL of DMF. The mixture was stirred for 0.5 h. Next, CoBr<sub>2</sub> (0.100 mmol) and the mixture was stirred for 1 h. Solvent was removed under vacuum. The mixture was redissolved in 3 mL DCE and silver carbonate was added (1.00 mmol), removed from the glovebox, heated to 100 °C, and stirred for 21 h. After 21 h, the solution was cooled to room temperature (25 °C), trimethoxybenzene (0.10 mmol) was added as internal standard, and the solution was filtered through Celite®. The resulting solution was concentrated in vacuo and an NMR in CDCl<sub>3</sub> was taken. The products were isolated and purified by column chromatography (25% v/v hexanes/ethyl acetate). <sup>1</sup>H NMR (δ, CDCl<sub>3</sub>, 400 MHz): -33.23 (s), -15.97 (s), -15.22 (s), -2.09 (s), -1.01 (s), 33.68 (s), 46.42 (s), 81.47 (s), 83.46 (s). λ<sub>max</sub> (CH<sub>2</sub>Cl<sub>2</sub>), nm (ε, M<sup>-1</sup> cm<sup>-1</sup>): 406 (15868), 545 (765), 587 (514). IR (diamond ATR, cm<sup>-1</sup>): ν(CO) = 1606, MS (+ESI) calculated [M+H<sup>+</sup>] 640.144, found 640.157, μ<sub>eff</sub> 1.88(8) μ<sub>B</sub> (Evans Method, CD<sub>2</sub>Cl<sub>2</sub>, 400 MHz).

**Synthesis of 7 (Co<sup>III</sup>(BQN) (BQN-BQN)).** In air, a 20 mL screw-top vial was charged with 1 (0.0581 g, 0.10 mmol), (2-methylbenzoyl)(quinolin-8-yl)amide (0.1346 g, 0.51 mmol), silver carbonate (0.2764 g, 1.0 mmol), a stir bar, and 5 mL dichloroethane. The solution was heated to 100°C and stirred for 19h. The mixture was cooled to room temperature and filtered through Celite®. The product was purified by column chromatography (40% v/v hexanes/ethyl acetate). Green block crystals were obtained by layering a concentrated solution of compound in CH<sub>2</sub>Cl<sub>2</sub> and petroleum ether (32.9 mg, 48% yield). <sup>1</sup>H NMR (δ, CDCl<sub>3</sub>, 400 MHz): 9.46 (d, J = 8.0 Hz, 1H), 8.71 (d, J = 5.3 Hz, 1H), 8.38 (d, J = 8.0 Hz, 1H), 8.07 (dd, J = 13.3, 8.2 Hz, 2H), 7.88 (d, J = 7.6 Hz, 1H), 7.72 (d, J = 8.2 Hz, 1H), 7.65 (t, J = 8.1 Hz, 1H), 7.48 (d, J = 5.3 Hz, 1H), 7.36 – 7.31 (m, 2H), 7.21 (dd, J = 8.2, 5.2 Hz, 1H), 7.16 (td, J = 9.3, 8.8, 3.6 Hz, 3H), 7.07 (t, J = 6.7 Hz, 3H), 7.01 – 6.93 (m, 2H), 6.85 (d, J = 7.9 Hz, 1H), 6.64 (dd, J = 12.1, 5.7 Hz, 2H), 6.57 (d, J = 7.4 Hz, 1H), 6.49 (t, J = 7.6 Hz, 1H), 6.38 (d, J = 8.1 Hz, 1H), 6.08 (d, J = 7.7 Hz, 1H), 2.29 (s, 3H), 1.14 (s, 3H), 1.12 (s, 3H). <sup>13</sup>C NMR (δ, CDCl<sub>3</sub>, 600 MHz): 180.60, 180.26, 178.87, 152.16, 150.42, 149.90, 149.46, 148.74, 148.52, 145.05, 144.81, 141.48, 141.04, 139.12, 138.53, 137.82, 137.80, 137.70, 136.85, 136.43, 136.28, 132.40, 130.71, 130.15, 129.84, 129.61, 129.23, 129.02, 128.80, 128.66, 128.48, 127.24, 126.71, 126.35, 126.23, 125.84, 125.49, 122.89, 122.53, 121.55, 121.05, 119.71, 119.06, 117.69, 115.35, 20.73, 19.39, 18.17. λ<sub>max</sub> (CH<sub>2</sub>Cl<sub>2</sub>), nm (ε, M<sup>-1</sup> cm<sup>-1</sup>): 648 (436), 430 (10346), MS (-ESI) calc. for C<sub>51</sub>H<sub>37</sub>ClCoN<sub>6</sub>O<sub>3</sub> 875.19, found 875.20, IR (diamond ATR, cm<sup>-1</sup>): ν(CO) = 1594.

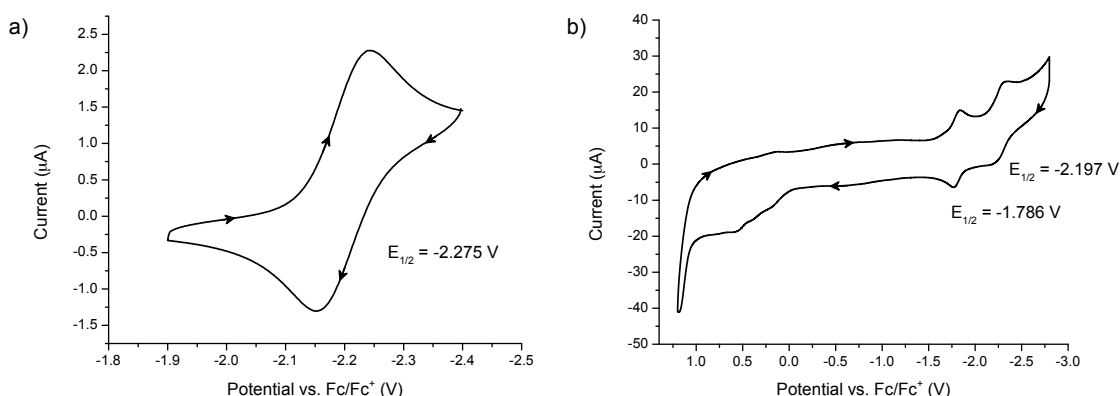

**Figure S8.** Cyclic voltammogram of  $\text{Co}^{\text{II}}(\text{BNQ})_2$  with 0.1M TBAPF<sub>6</sub> as the supporting electrolyte in a) acetonitrile and b) dimethylformamide. Referenced vs. Fc/Fc<sup>+</sup> with an Ag/Ag<sup>+</sup> counter electrode, a Pt-wire auxiliary electrode, and a glass-carbon working electrode.

## 8. General procedure for reaction condition screen for biaryl homocoupling of 1.

Under an inert atmosphere, a 20 mL scintillation vial was charged with a stir bar, 1 (0.047 g, 0.10 mmol), oxidant (1.0 mmol), additive (1.0 mmol) and 5 mL of CH<sub>2</sub>Cl<sub>2</sub>. The mixture was heated to 100 °C and stirred for 24 h. After 24 h, the mixture was cooled to room temperature (ca. 25 °C), removed from the glovebox, and filtered through Celite®. The resulting solution was concentrated in vacuo and an NMR in CDCl<sub>3</sub> was taken. The products were isolated and purified by column chromatography (25% v/v hexanes/ethyl acetate).

**Table S1.** Reaction condition screen for stoichiometric biaryl coupling from the  $\text{Co}^{\text{II}}(\text{BNQ})_2$  complex.

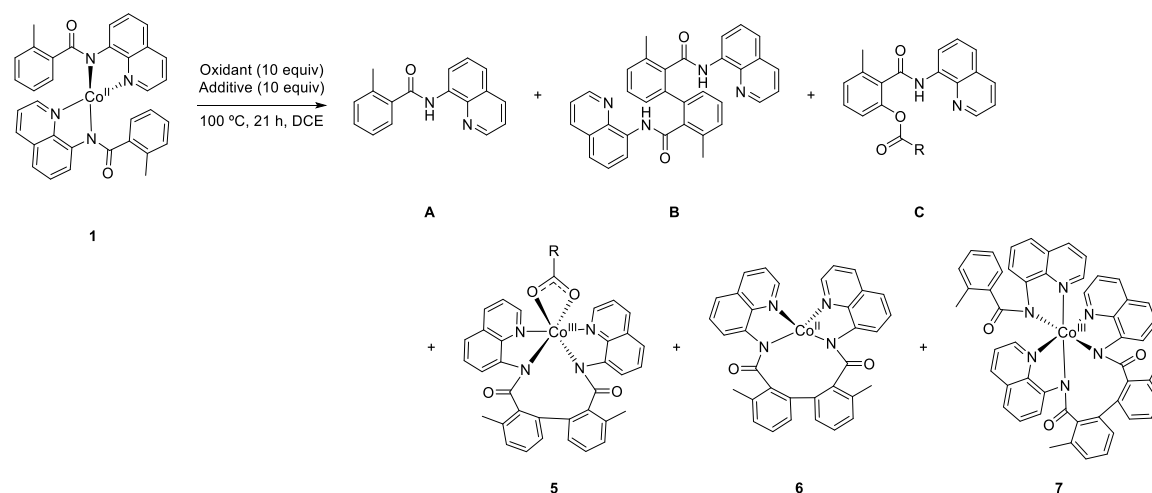

| Entry          | Oxidant                                      | Additive                        | Yield A | Yield B | Yield C | Yield 2 | Yield 3 | Yield 4 | Total [c-c] |
|----------------|----------------------------------------------|---------------------------------|---------|---------|---------|---------|---------|---------|-------------|
| 1              | Ag <sub>2</sub> CO <sub>3</sub>              | Na <sub>2</sub> CO <sub>3</sub> | 13%     | —       | —       | —       | 15%     | 44%     | 59%         |
| 2              | Ag <sub>2</sub> CO <sub>3</sub>              | NaOAc                           | 9%      | 2%      | 5%      | —       | 18%     | 58%     | 78%         |
| 3              | Ag <sub>2</sub> CO <sub>3</sub>              | NaOPiv                          | —       | —       | 61%     | 14%     | 15%     | —       | 29%         |
| 4              | Ag <sub>2</sub> CO <sub>3</sub>              | Et <sub>3</sub> N               | 29%     | 34%     | —       | —       | —       | —       | 34%         |
| 5 <sup>a</sup> | Ag <sub>2</sub> CO <sub>3</sub>              | Et <sub>3</sub> N               | 20%     | 17%     | —       | 36%     | —       | —       | 53%         |
| 6 <sup>b</sup> | Ag <sub>2</sub> CO <sub>3</sub>              | Et <sub>3</sub> N               | 43%     | 47%     | —       | 8%      | —       | —       | 55%         |
| 7 <sup>c</sup> | Ag <sub>2</sub> CO <sub>3</sub>              | Et <sub>3</sub> N               | 25%     | 20%     | —       | —       | —       | —       | 20%         |
| 8              | Ag <sub>2</sub> CO <sub>3</sub>              | —                               | 7%      | 3%      | —       | 20%     | 49%     | —       | 72%         |
| 9              | Ag <sub>2</sub> O                            | —                               | 8%      | —       | —       | —       | 37%     | —       | 37%         |
| 10             | K <sub>2</sub> S <sub>2</sub> O <sub>8</sub> | NaOPiv                          | 15%     | —       | —       | —       | —       | —       | 0%          |
| 11             | O <sub>2</sub> (sat.)                        | NaOPiv                          | —       | —       | —       | —       | —       | —       | 0%          |

<sup>a</sup>Reaction was run in 1.40 mL Et<sub>3</sub>N (100 equiv) with 0.5 mL DCE to solubilize the cobalt complex. <sup>b</sup>Reaction was run under inert conditions. <sup>c</sup>Reaction was run for 42 h.

**Table S2.** Reaction condition screen for stoichiometric biaryl coupling from the Co<sup>II</sup>(BNQ)<sub>2</sub> complex with an outer-sphere oxidant.

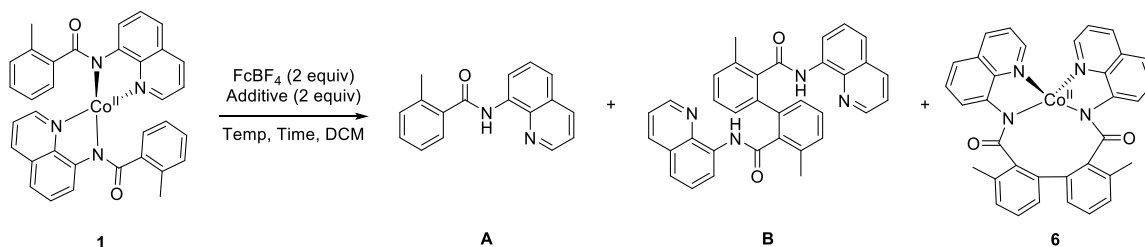

| Entry            | Additive          | Time | Temp. | Yield A | Yield B | Yield 6 | Total [c-c] |
|------------------|-------------------|------|-------|---------|---------|---------|-------------|
| 1                | NaOPiv            | 21h  | 25 °C | 21%     | 22%     | 11%     | 33%         |
| 2                | NaOPiv            | 21h  | 60 °C | 36%     | 31%     | 33%     | 64%         |
| 3 <sup>a,b</sup> | NaOPiv            | 3h   | 25 °C | 47%     | —       | 10%     | 10%         |
| 4                | Et <sub>3</sub> N | 3h   | 25 °C | 18%     | —       | —       | 0%          |

<sup>a</sup>Yields determined using 1,3,5-trimethoxybenzene as the internal standard <sup>b</sup>72% of the starting complex was recovered.

## 9. Effect of an aryl substituent

Under an inert atmosphere, a 20 mL scintillation vial was charged with a stir bar, benzylquinolinamide (BQN, 0.200 mmol), KH (0.220 mmol), and 3 mL of DMF. The mixture was stirred for 0.5 h. Next, CoBr<sub>2</sub> (0.100 mmol) and the mixture was stirred

for 1 h. Solvent was removed under vacuum. The mixture was redissolved in 3 mL DCE and silver carbonate was added (1.00 mmol), removed from the glovebox, heated to 100 °C, and stirred for 21 h. After 21 h, the solution was cooled to room temperature (25 °C), trimethoxybenzene (0.10 mmol) was added as internal standard, and the solution was filtered through Celite®. The resulting solution was concentrated in vacuo and an NMR in CDCl<sub>3</sub> was taken. The products were isolated and purified by column chromatography (25% v/v hexanes/ethyl acetate).

When the reaction was performed with 2-methyl-N-(quinolin-8-yl)benzamide, di-BQNH and Co<sup>II</sup>(BQN-BQN) were isolated in a 7% and 87% yield respectively (Scheme S1). When the reaction was performed with 3-methoxy-2-methyl-N-(quinolin-8-yl)benzamide Crude NMR showed a mixture of di-BNQH<sup>OMe</sup>, Co<sup>II</sup>(BNQ<sup>OMe</sup>)<sub>2</sub>, and Co<sup>II</sup>(BQN<sup>OMe</sup>-BQN<sup>OMe</sup>). BQNH<sup>OMe</sup>, di-BNQH<sup>OMe</sup> and Co<sup>II</sup>(BQN<sup>OMe</sup>-BQN<sup>OMe</sup>) were isolated in a 45%, 7%, and 16% yield respectively (Scheme S1).

**Scheme S1.** Stoichiometric cross-coupling of BQN with different aryl substituents.

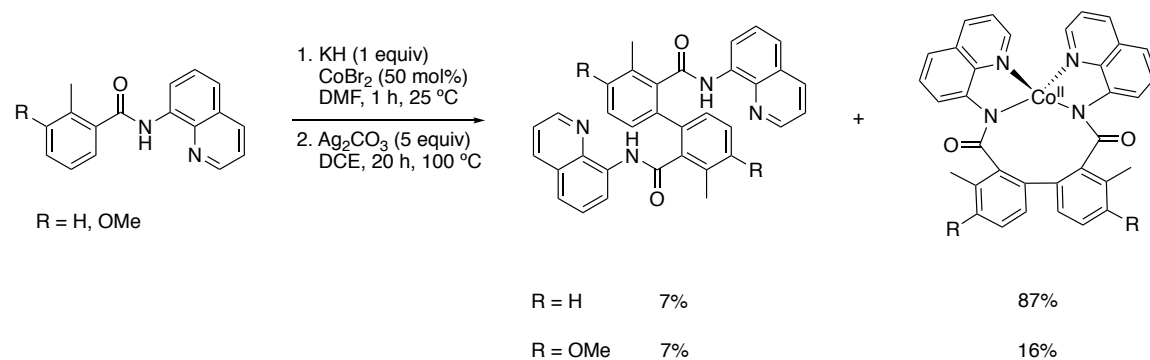

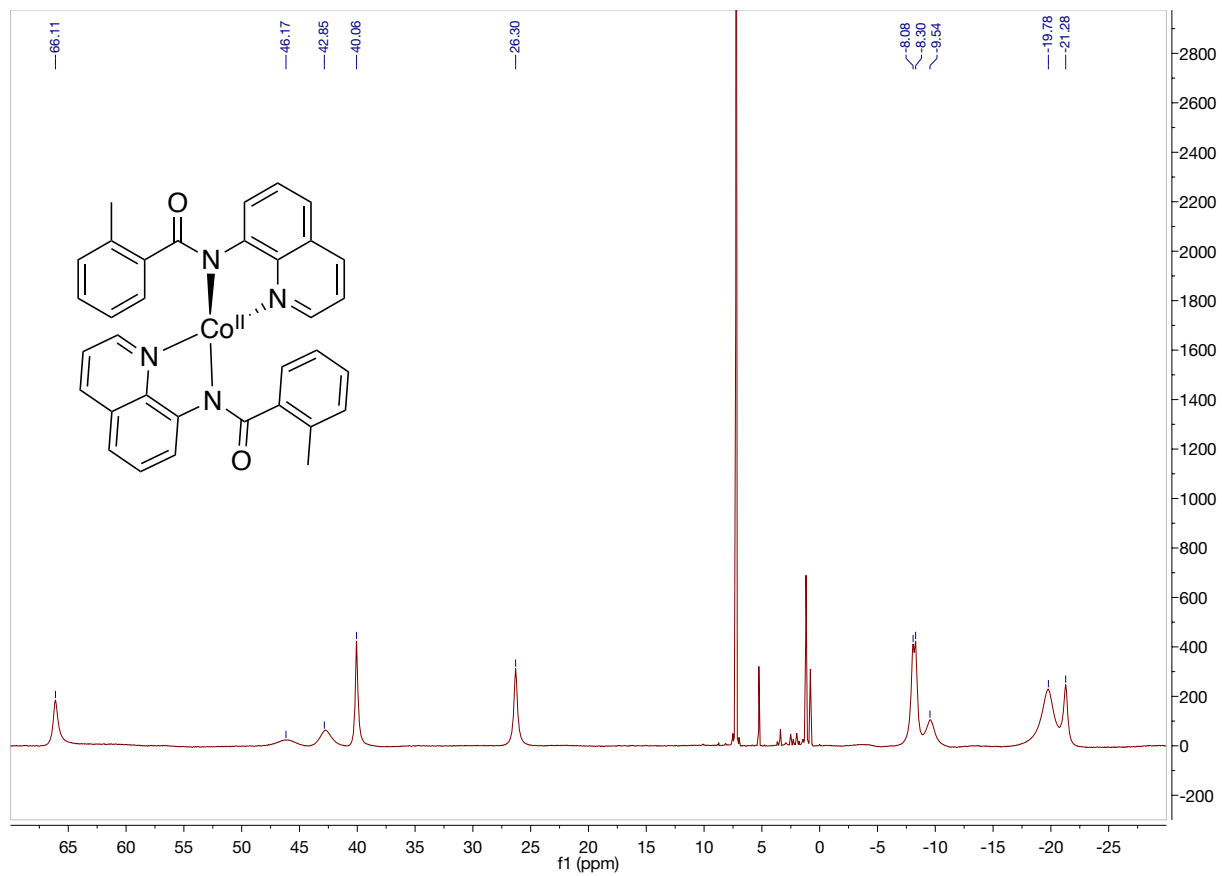

**Figure S9:**  $^1\text{H}$  NMR spectrum of  $\text{Co}^{\text{II}}(\text{BNQ})_2$  (1) ( $\text{CDCl}_3$ , 400 MHz)

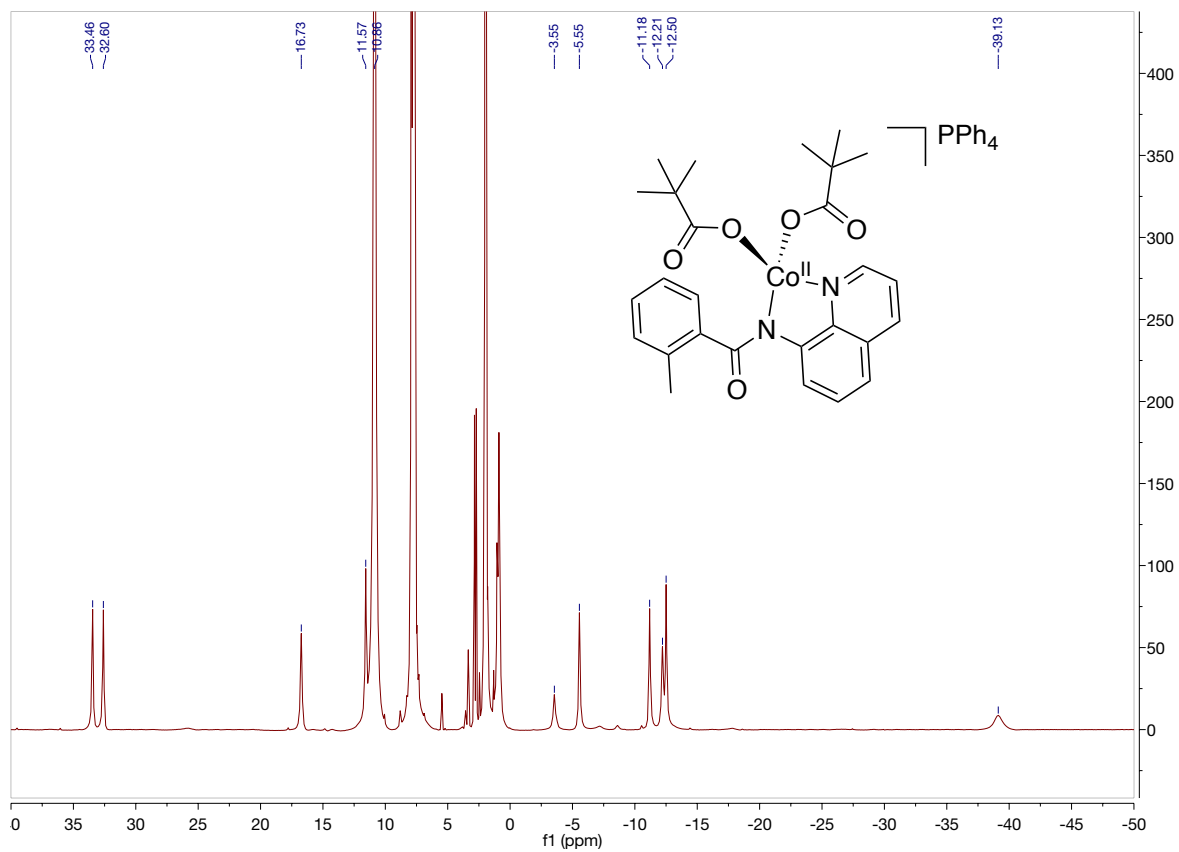

**Figure S10:**  $^1\text{H}$  NMR spectrum of  $(\text{PPh}_4)[\text{Co}^{\text{II}}(\text{OPiv})_2(\text{BQN})]$  (2) ( $\text{CDCl}_3$ , 400 MHz)

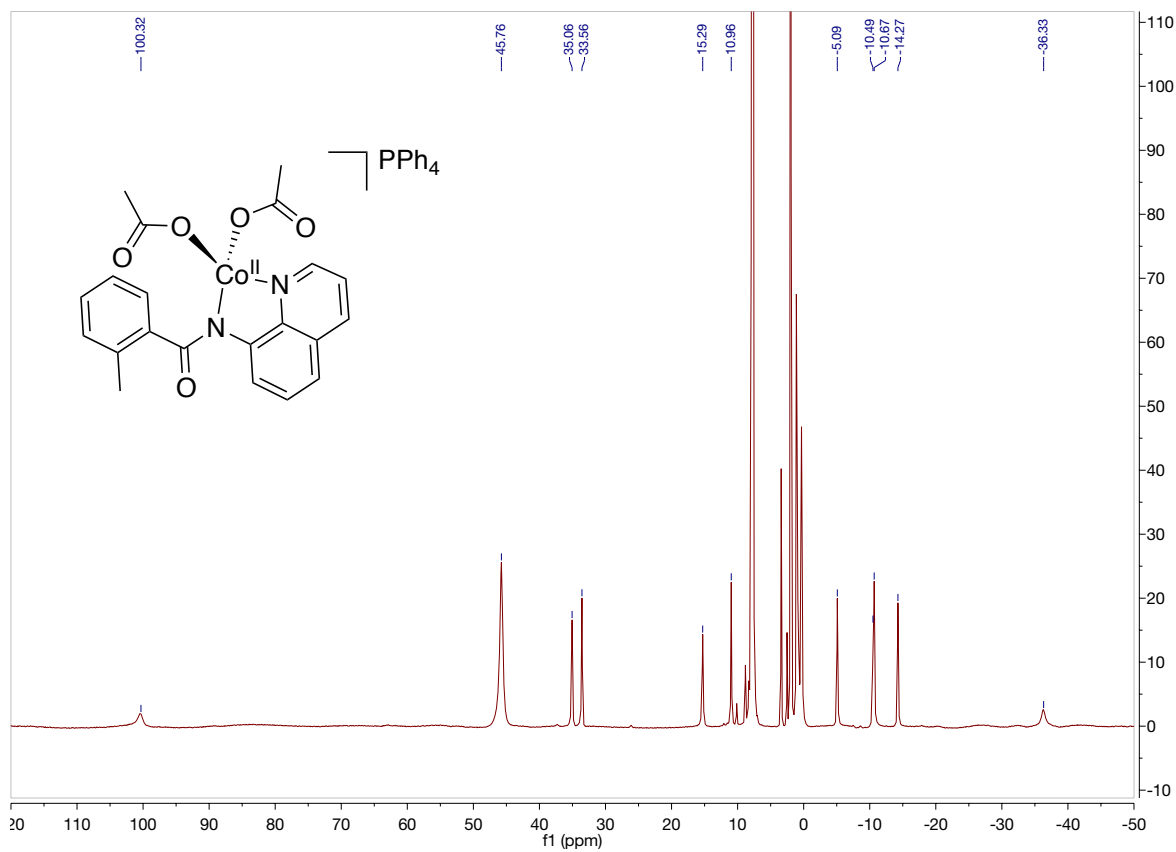

**Figure S11:** <sup>1</sup>H NMR spectrum of **(PPh<sub>4</sub>)[Co<sup>II</sup>(OAc)<sub>2</sub>(BQN)] (3)** (CDCl<sub>3</sub>, 400 MHz)

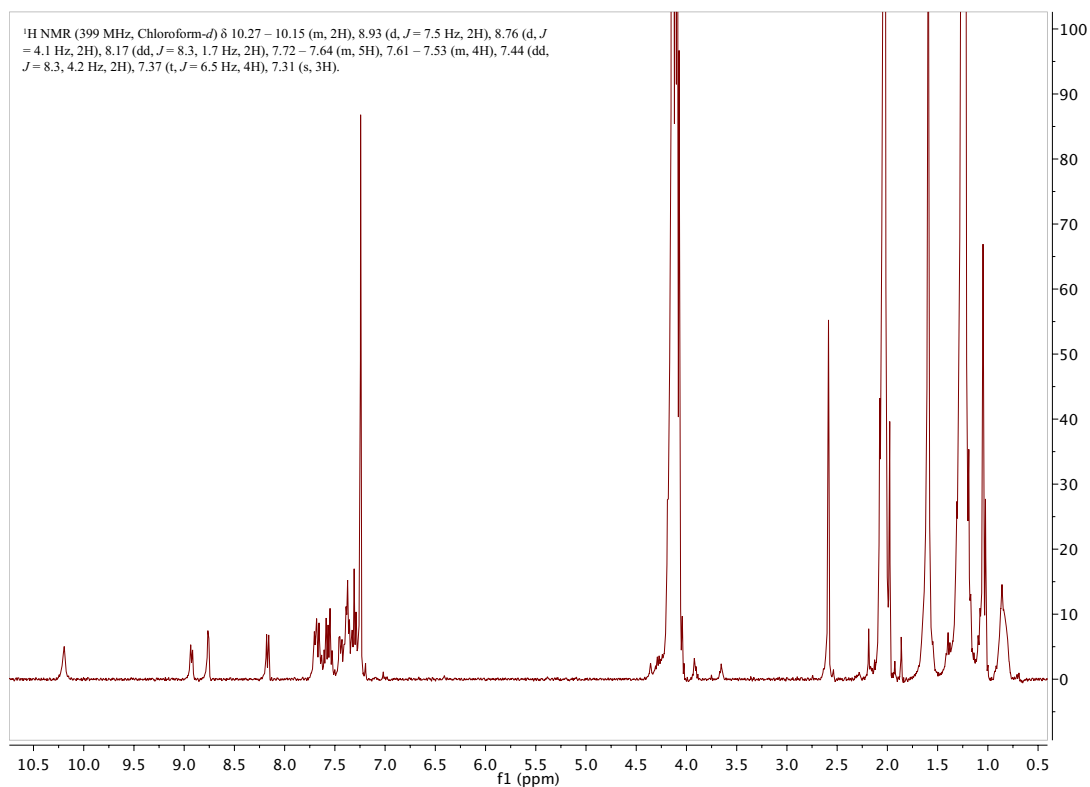

**Figure S12:** <sup>1</sup>H NMR spectrum of  $\text{Co}^{\text{III}}(\text{H}_2\text{O})(\text{BQN})(\text{BQNN})$  (**4**) ( $\text{CDCl}_3$ , 400 MHz)

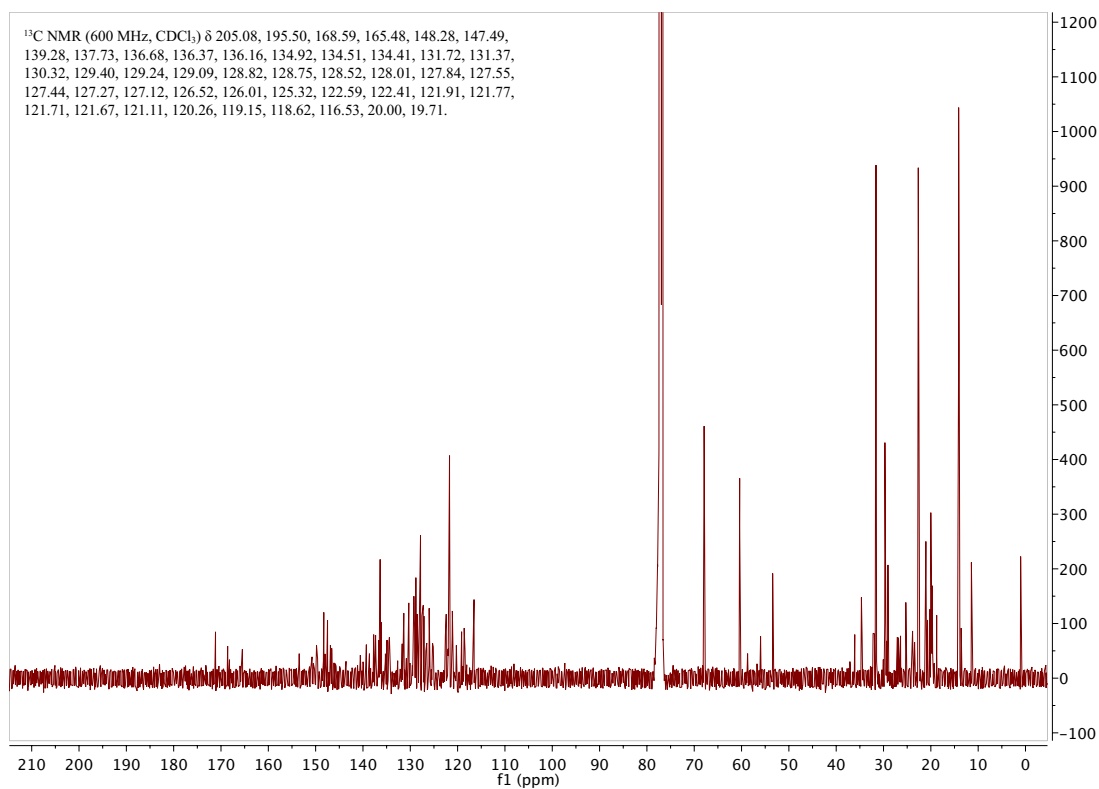

**Figure S13:** <sup>13</sup>C NMR spectrum of  $\text{Co}^{\text{III}}(\text{H}_2\text{O})(\text{BQN})(\text{BQNN})$  (**4**) ( $\text{CDCl}_3$ , 600 MHz)



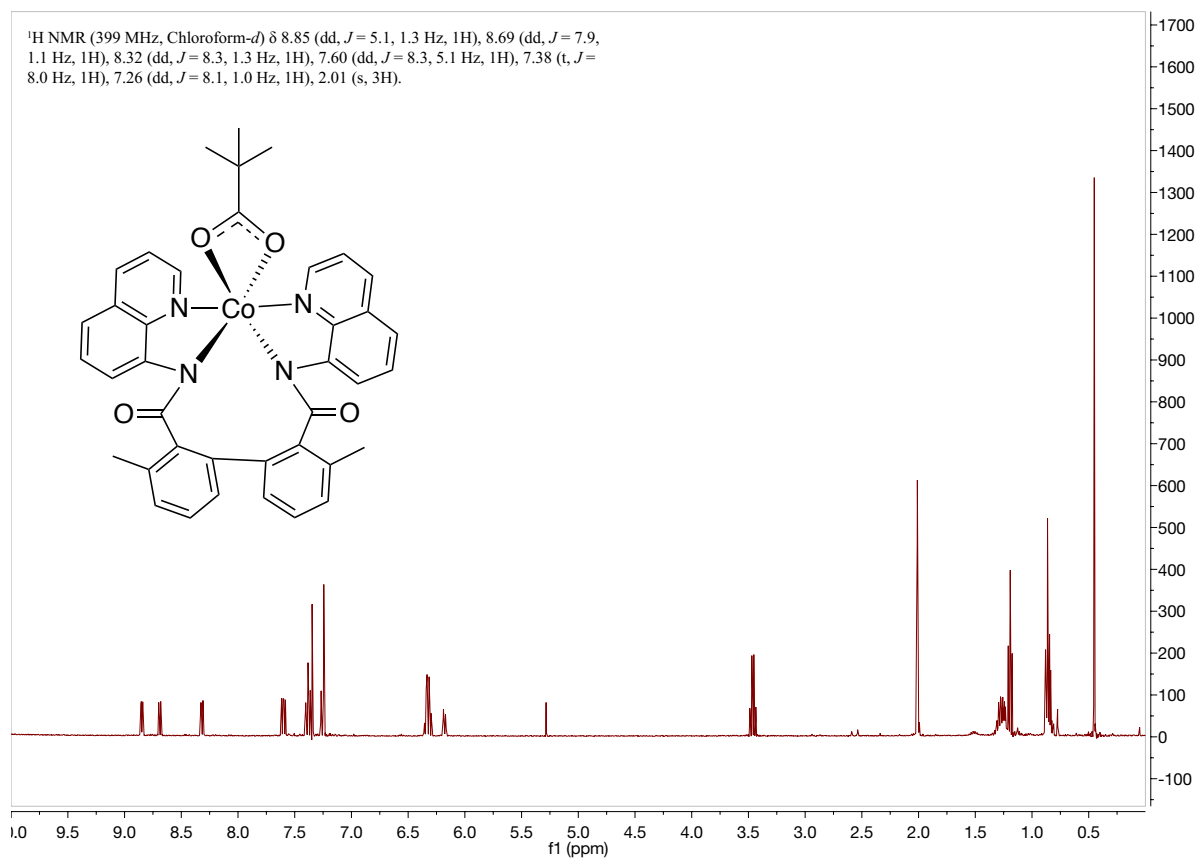

**Figure S14:** <sup>1</sup>H NMR spectrum of  $\text{Co}^{\text{III}}(\text{PivO})(\text{BQN-BQN})$  (**5**) ( $\text{CDCl}_3$ , 400 MHz)

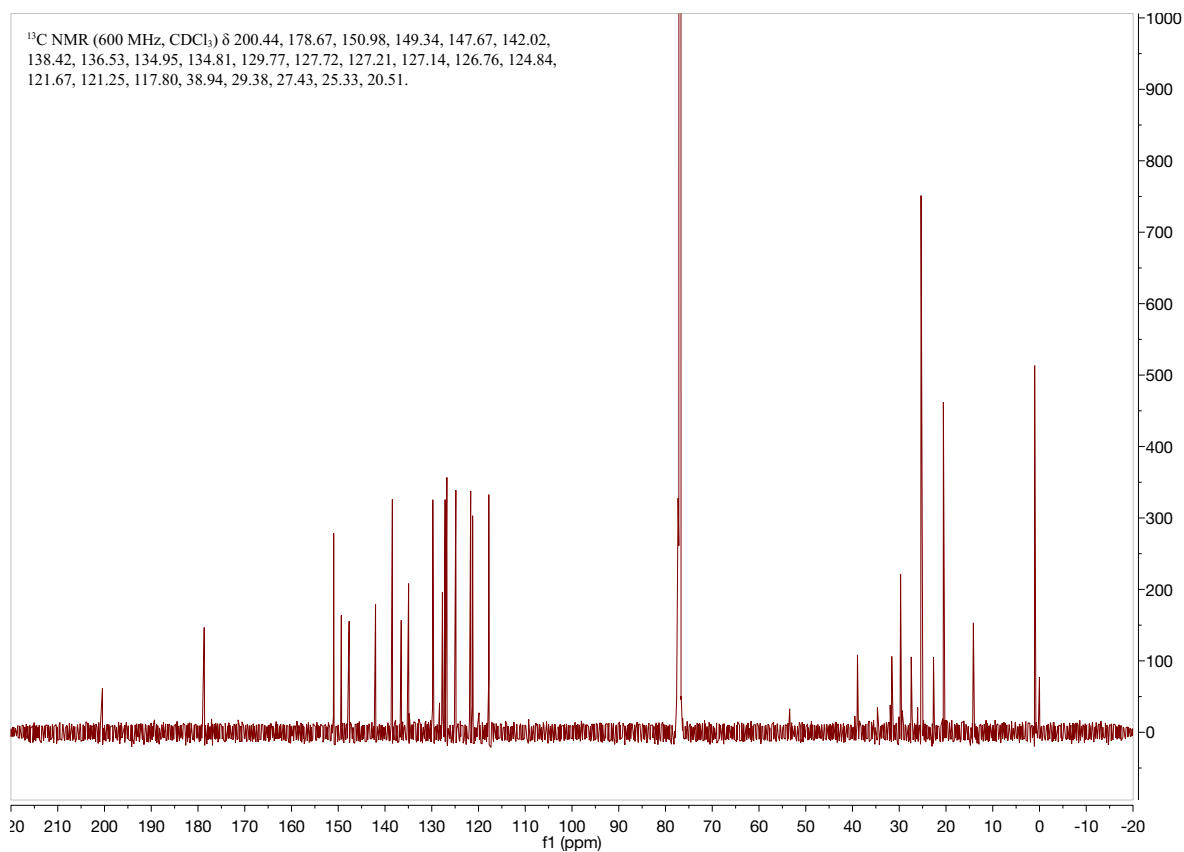

**Figure S15:**  $^{13}\text{C}$  NMR spectrum of  $\text{Co}^{\text{III}}(\text{PivO})(\text{BQN-BQN})$  (**5**) ( $\text{CDCl}_3$ , 600 MHz)

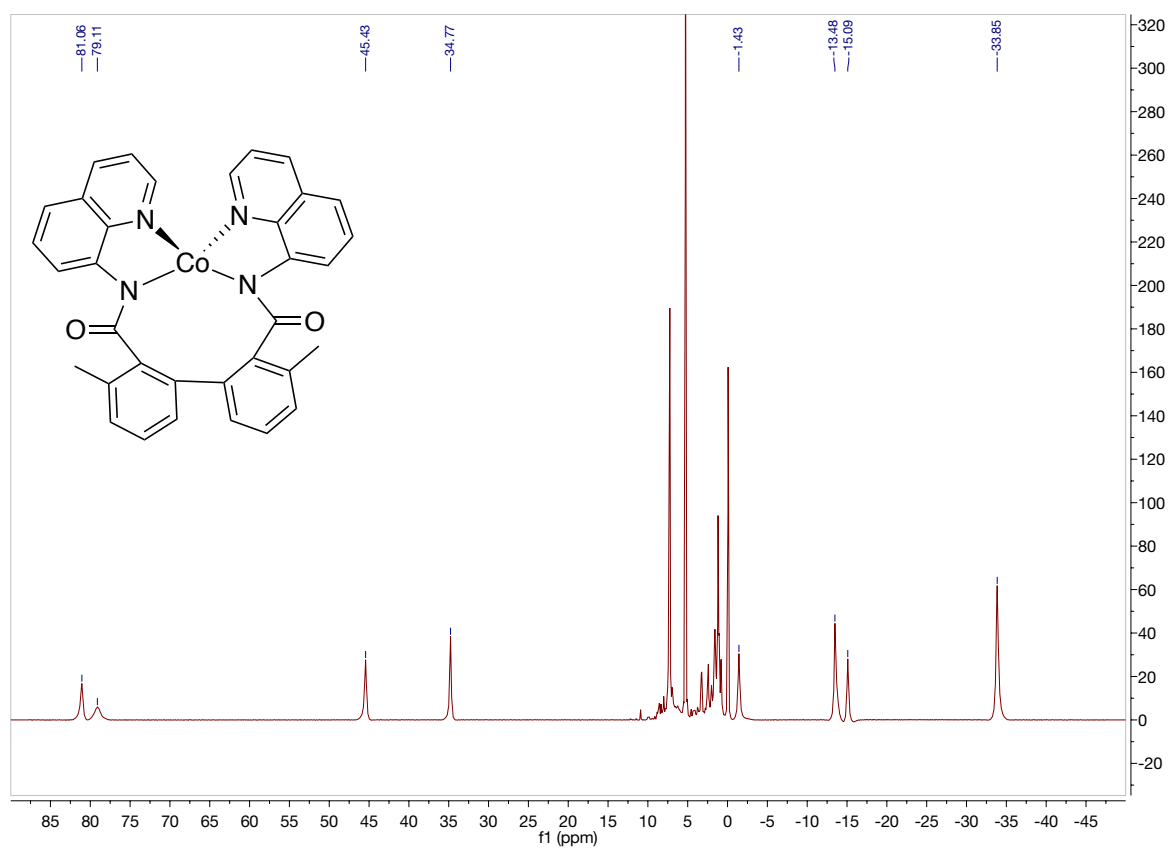

**Figure S16:**  $^1\text{H}$  NMR spectrum of  $\text{Co}^{\text{II}}(\text{BQN-BQN})$  (**6**) ( $\text{CDCl}_3$ , 400 MHz)

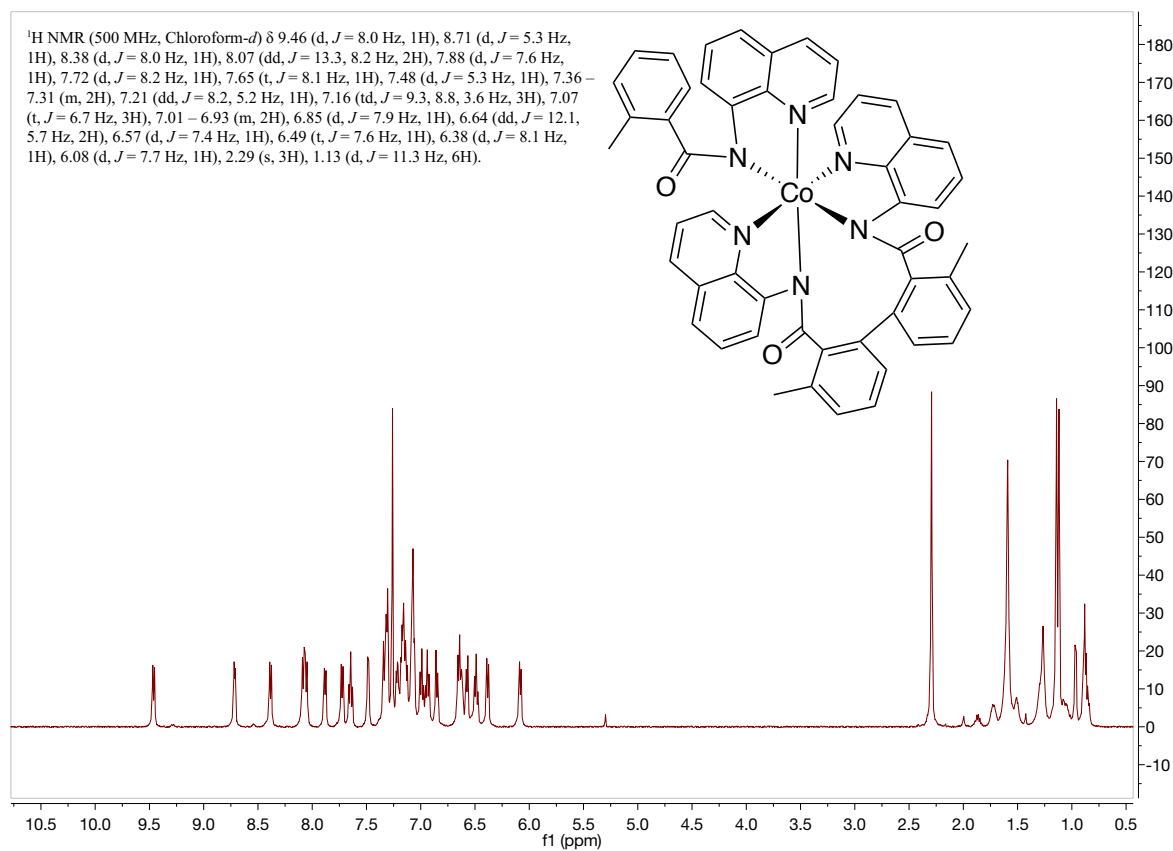

**Figure S17:**  $^1\text{H}$  NMR spectrum of  $\text{Co}^{\text{III}}(\text{BQN})(\text{BQN-BQN})$  (**7**) ( $\text{CDCl}_3$ , 400 MHz)

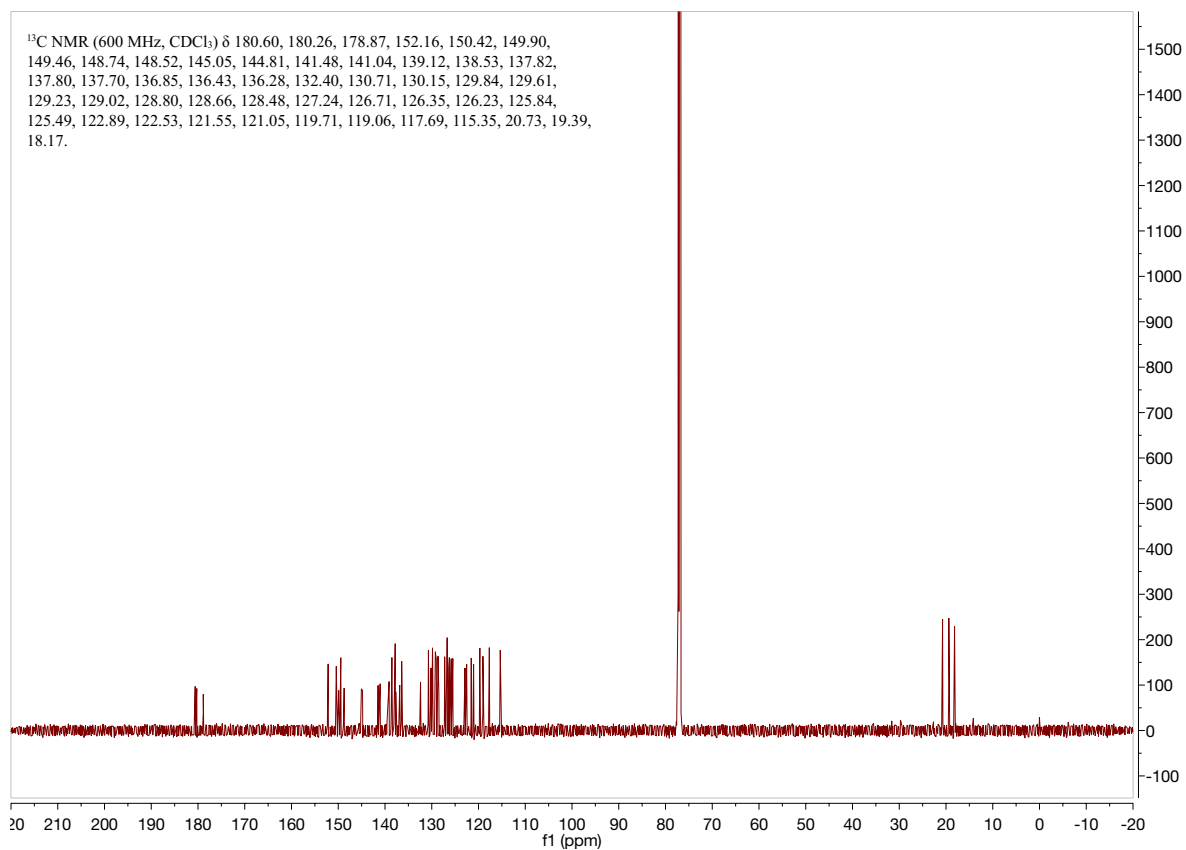

**Figure S18:** <sup>13</sup>C NMR spectrum of Co<sup>III</sup>(BQN)(BQN-BQN) (7) (CDCl<sub>3</sub>, 600 MHz)

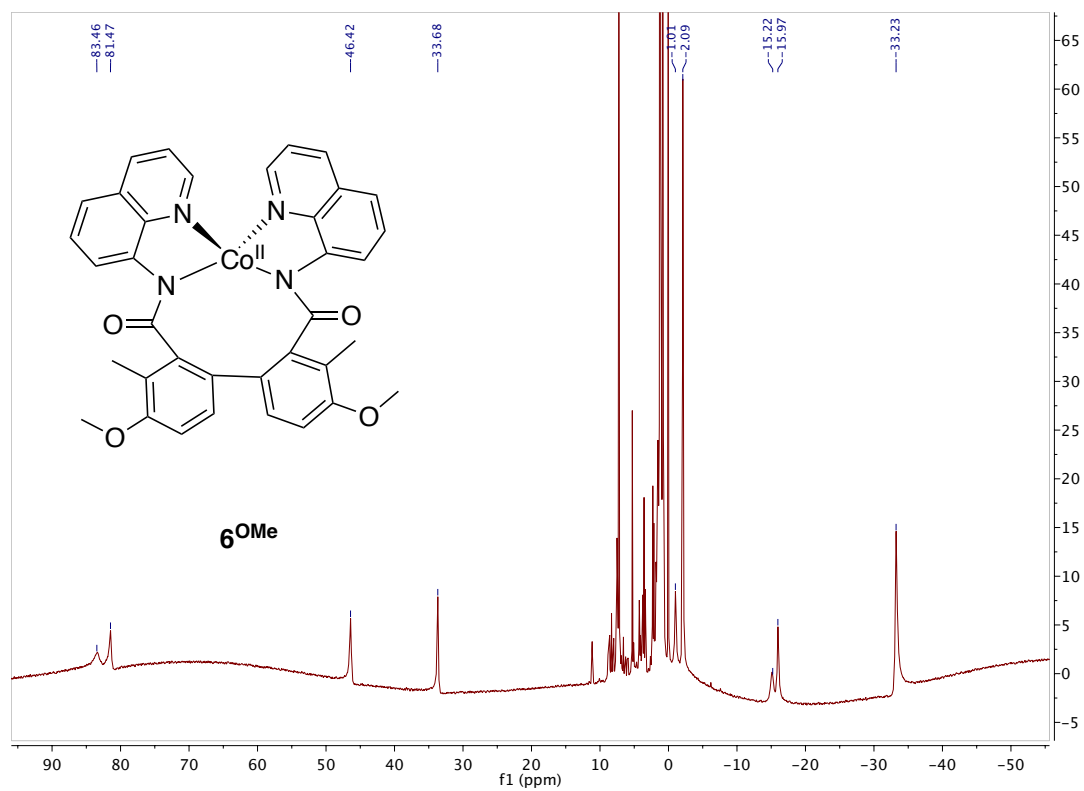

**Figure S19.** <sup>1</sup>H NMR spectrum of  $\text{Co}^{\text{II}}(\text{BQN}^{\text{OMe}}\text{-BQN}^{\text{OMe}})$  ( $6^{\text{OMe}}$ ) ( $\text{CDCl}_3$ , 400 MHz)

## 11. X-Ray crystallographic data

**Table S3.** Crystal data for **Co<sup>II</sup>(BNQ)<sub>2</sub> (1)**

|                                                                                      | <b>Co<sup>II</sup>(BNQ)<sub>2</sub> (1)</b>                     |
|--------------------------------------------------------------------------------------|-----------------------------------------------------------------|
| Empirical formula                                                                    | C <sub>34</sub> H <sub>26</sub> CoN <sub>4</sub> O <sub>2</sub> |
| Formula weight                                                                       | 581.52                                                          |
| <i>T</i> (K)                                                                         | 100.01                                                          |
| $\lambda$ (Å)                                                                        | 0.71073                                                         |
| Crystal size (mm <sup>3</sup> )                                                      | 0.38 x 0.34 x 0.29                                              |
| Crystal system                                                                       | Orthorhombic                                                    |
| Space group                                                                          | Pbca                                                            |
| <i>a</i> (Å)                                                                         | 12.1904                                                         |
| <i>b</i> (Å)                                                                         | 15.2935                                                         |
| <i>c</i> (Å)                                                                         | 23.3304                                                         |
| $\alpha$ (°)                                                                         | 90                                                              |
| $\beta$ (°)                                                                          | 90                                                              |
| $\gamma$ (°)                                                                         | 90                                                              |
| <i>V</i> (Å <sup>3</sup> )                                                           | 5420.00                                                         |
| <i>Z</i>                                                                             | 8                                                               |
| $\rho_{\text{calcd}}$ (Mg/m <sup>3</sup> )                                           | 1.425                                                           |
| GOF on <i>F</i> <sup>2</sup>                                                         | 1.033                                                           |
| <i>R</i> <sub>1</sub> , <i>wR</i> <sub>2</sub> [ <i>I</i> > 2 $\sigma$ ( <i>I</i> )] | 0.0355, 0.1006                                                  |
| CCDC #                                                                               | 1848074                                                         |

**Table S4.** Crystal data for **(PPh<sub>4</sub>)[Co<sup>II</sup>(OPiv)<sub>2</sub>(BQN)] (2)** and **(PPh<sub>4</sub>)[Co<sup>II</sup>(OAc)<sub>2</sub>(BQN)] (3)**.

|                                                               | <b>(PPh<sub>4</sub>)[Co<sup>II</sup>(OPiv)<sub>2</sub>(BQN)] (2)</b> | <b>(PPh<sub>4</sub>)[Co<sup>II</sup>(OAc)<sub>2</sub>(BQN)] (3)</b> |
|---------------------------------------------------------------|----------------------------------------------------------------------|---------------------------------------------------------------------|
| Empirical formula                                             | C <sub>55</sub> H <sub>61</sub> CoN <sub>2</sub> O <sub>6</sub> P    | C <sub>45</sub> H <sub>39</sub> CoN <sub>2</sub> O <sub>5</sub> P   |
| Formula weight                                                | 935.95                                                               | 777.68                                                              |
| <i>T</i> (K)                                                  | 101                                                                  | 155                                                                 |
| $\lambda$ (Å)                                                 | 0.71073                                                              | 0.71073                                                             |
| Crystal size (mm <sup>3</sup> )                               | 0.40 x 0.29 x 0.18                                                   | 0.34 x 0.27 x 0.13                                                  |
| Crystal system                                                | Monoclinic                                                           | Triclinic                                                           |
| Space group                                                   | P2 <sub>1</sub> /c                                                   | <i>P</i> -1                                                         |
| <i>a</i> (Å)                                                  | 13.1076                                                              | 10.5354                                                             |
| <i>b</i> (Å)                                                  | 22.2355                                                              | 12.5903                                                             |
| <i>c</i> (Å)                                                  | 16.9979                                                              | 15.1966                                                             |
| $\alpha$ (°)                                                  | 90                                                                   | 79.8711                                                             |
| $\beta$ (°)                                                   | 101.0538                                                             | 86.4335                                                             |
| $\gamma$ (°)                                                  | 90                                                                   | 78.9990                                                             |
| <i>V</i> (Å <sup>3</sup> )                                    | 4862.18                                                              | 1947.00                                                             |
| <i>Z</i>                                                      | 4                                                                    | 2                                                                   |
| $\rho_{\text{calcd}}$ (Mg/m <sup>3</sup> )                    | 1.279                                                                | 1.327                                                               |
| GOF on <i>F</i> <sup>2</sup>                                  | 1.051                                                                | 1.040                                                               |
| <i>R</i> 1, <i>wR</i> 2 [ <i>I</i> > 2 $\alpha$ ( <i>I</i> )] | 0.0466, 0.1230                                                       | 0.0475, 0.1280                                                      |
| CCDC #                                                        | 1862102                                                              | 1862295                                                             |

**Table S5.** Crystal data for **Co<sup>III</sup>(H<sub>2</sub>O)(BQN)(BQNN) (4)** and **Co<sup>III</sup>(py)(BQN)(BQNN) (4<sup>py</sup>)**

|                                                               | <b>Co<sup>III</sup>(H<sub>2</sub>O) (BQN)(BQNN)</b>             | <b>Co<sup>III</sup>(py) (BQN)(BQNN)</b>                         |
|---------------------------------------------------------------|-----------------------------------------------------------------|-----------------------------------------------------------------|
| Empirical formula                                             | C <sub>38</sub> H <sub>30</sub> CoN <sub>5</sub> O <sub>2</sub> | C <sub>39</sub> H <sub>30</sub> CoN <sub>5</sub> O <sub>2</sub> |
| Formula weight                                                | 670.63                                                          | 659.61                                                          |
| <i>T</i> (K)                                                  | 100(2)                                                          | 100(2)                                                          |
| $\lambda$ (Å)                                                 | 1.54184                                                         | 0.71073                                                         |
| Crystal size (mm <sup>3</sup> )                               | 0.24 x 0.11 x 0.09                                              | 0.31 x 0.13 x 0.13                                              |
| Crystal system                                                | Triclinic                                                       | Monoclinic                                                      |
| Space group                                                   | <i>P</i> -1                                                     | <i>P</i> 2 <sub>1</sub> / <i>c</i>                              |
| <i>a</i> (Å)                                                  | 12.5135(5)                                                      | 12.7185(3)                                                      |
| <i>b</i> (Å)                                                  | 16.2562(4)                                                      | 9.1380(2)                                                       |
| <i>c</i> (Å)                                                  | 17.4421(8)                                                      | 30.1522(7)                                                      |
| $\alpha$ (°)                                                  | 87.763(3)                                                       | 90                                                              |
| $\beta$ (°)                                                   | 69.624(4)                                                       | 97.574(2)                                                       |
| $\gamma$ (°)                                                  | 70.719(3)                                                       | 90                                                              |
| <i>V</i> (Å <sup>3</sup> )                                    | 3627.9(2)                                                       | 3473.79(14)                                                     |
| <i>Z</i>                                                      | 4                                                               | 4                                                               |
| $\rho_{\text{calcd}}$ (Mg/m <sup>3</sup> )                    | 1.228                                                           | 1.261                                                           |
| GOF on <i>F</i> <sup>2</sup>                                  | 1.029                                                           | 1.034                                                           |
| <i>R</i> 1, <i>wR</i> 2 [ <i>I</i> > 2 $\alpha$ ( <i>I</i> )] | 0.0932, 0.2364                                                  | 0.0493, 0.1285                                                  |
| CCDC #                                                        | 1988219                                                         | 1862100                                                         |



**Table S6.** Crystal data for **Co<sup>III</sup>(PivO)(BQN-BQN) (5)** and **Co<sup>III</sup>(BNQ)(BQN-BQN) (7)**.

|                                                               | <b>Co<sup>III</sup>(PivO)(BQN-BQN) (5)</b>                      | <b>Co<sup>III</sup>(BNQ)(BQN-BQN) (7)</b>                                       |
|---------------------------------------------------------------|-----------------------------------------------------------------|---------------------------------------------------------------------------------|
| Empirical formula                                             | C <sub>45</sub> H <sub>39</sub> CoN <sub>4</sub> O <sub>4</sub> | C <sub>53</sub> H <sub>41</sub> Cl <sub>4</sub> CoN <sub>6</sub> O <sub>3</sub> |
| Formula weight                                                | 758.73                                                          | 1010.65                                                                         |
| <i>T</i> (K)                                                  | 100                                                             | 101                                                                             |
| $\lambda$ (Å)                                                 | 0.71973                                                         | 1.54184                                                                         |
| Crystal size (mm <sup>3</sup> )                               | 0.30 x 0.20 x 0.18                                              | 0.44 x 0.12 x 0.08                                                              |
| Crystal system                                                | Triclinic                                                       | Monoclinic                                                                      |
| Space group                                                   | <i>P</i> -1                                                     | <i>P</i> 2 <sub>1</sub> / <i>c</i>                                              |
| <i>a</i> (Å)                                                  | 10.9148                                                         | 11.6863                                                                         |
| <i>b</i> (Å)                                                  | 12.2160                                                         | 20.5971                                                                         |
| <i>c</i> (Å)                                                  | 14.5150                                                         | 19.6222                                                                         |
| $\alpha$ (°)                                                  | 77.378                                                          | 90                                                                              |
| $\beta$ (°)                                                   | 74.686                                                          | 106.514                                                                         |
| $\gamma$ (°)                                                  | 89.375                                                          | 90                                                                              |
| <i>V</i> (Å <sup>3</sup> )                                    | 1819.28                                                         | 4528.3                                                                          |
| <i>Z</i>                                                      | 2                                                               | 4                                                                               |
| $\rho_{\text{calcd}}$ (Mg/m <sup>3</sup> )                    | 1.385                                                           | 1.482                                                                           |
| GOF on <i>F</i> <sup>2</sup>                                  | 1.056                                                           | 1.017                                                                           |
| <i>R</i> 1, <i>wR</i> 2 [ <i>I</i> > 2 $\alpha$ ( <i>I</i> )] | 0.0393, 0.1124                                                  | 0.0670, 0.1965                                                                  |
| CCDC #                                                        | 1848433                                                         | 1862101                                                                         |

**Table S7.** Crystal data for **Co<sup>II</sup>(BQN-BQN) (6)** and **Co<sup>II</sup>(BQN<sup>OMe</sup>-BQN<sup>OMe</sup>) (6<sup>OMe</sup>)**

|                                                               | <b>Co<sup>II</sup>(BQN-BQN) (6)</b>                             | <b>Co<sup>II</sup>(BQN<sup>OMe</sup>-BQN<sup>OMe</sup>) (6<sup>OMe</sup>)</b> |
|---------------------------------------------------------------|-----------------------------------------------------------------|-------------------------------------------------------------------------------|
| Empirical formula                                             | C <sub>34</sub> H <sub>24</sub> CoN <sub>4</sub> O <sub>2</sub> | C <sub>36</sub> H <sub>28</sub> CoN <sub>4</sub> O <sub>4</sub>               |
| Formula weight                                                | 579.50                                                          | 639.577                                                                       |
| <i>T</i> (K)                                                  | 100                                                             | 106(1)                                                                        |
| $\lambda$ (Å)                                                 | 1.54184                                                         | 0.71073                                                                       |
| Crystal size (mm <sup>3</sup> )                               | 0.2 x 0.1 x 0.04                                                | 0.21 x 0.14 x 0.14                                                            |
| Crystal system                                                | Monoclinic                                                      | Monoclinic                                                                    |
| Space group                                                   | P2 <sub>1</sub> /c                                              | C2/c                                                                          |
| <i>a</i> (Å)                                                  | 11.1507                                                         | 12.0679(2)                                                                    |
| <i>b</i> (Å)                                                  | 16.6952                                                         | 16.0420(2)                                                                    |
| <i>c</i> (Å)                                                  | 14.6913                                                         | 15.5043(2)                                                                    |
| $\alpha$ (°)                                                  | 90                                                              | 90                                                                            |
| $\beta$ (°)                                                   | 99.221                                                          | 92.0380(1)                                                                    |
| $\gamma$ (°)                                                  | 90                                                              | 90                                                                            |
| <i>V</i> (Å <sup>3</sup> )                                    | 2699.64                                                         | 2999.63(7)                                                                    |
| <i>Z</i>                                                      | 4                                                               | 1                                                                             |
| $\rho_{\text{calcd}}$ (Mg/m <sup>3</sup> )                    | 1.426                                                           | 1.416                                                                         |
| GOF on <i>F</i> <sup>2</sup>                                  | 1.064                                                           | 1.057                                                                         |
| <i>R</i> 1, <i>wR</i> 2 [ <i>I</i> > 2 $\alpha$ ( <i>I</i> )] | 0.0817, 0.2325                                                  | 0.0418, 0.1285                                                                |
| CCDC #                                                        | 1850726                                                         | 1862100                                                                       |

## 12. Basis set and density functional effect.

To validate impact of the used density functional (B3LYP-D3BJ) to the calculated rate-limiting steps of the *charge neutral* and *anionic* mechanisms of the Co-mediated dehydrogenative dimerization of AQ-directed benzamides we recalculated geometries and energies of the C–H activation and C–C coupling transition states and associated pre-reaction complexes at the M06/BS1 level of theory. We found that at the M06/BS1 level rate-determining step of the *charge neutral* pathway is the second C–H bond activation with a 31.3 kcal/mol activation barrier, since a barrier required for its C–C coupling step is 24.1 kcal/mol. Meantime, the rate-limiting C–C coupling free energy barrier for the *anionic* pathway is 24.4 kcal/mol.

**Table S8.** Free energy barriers of the rate-limiting steps of the *charge neutral* and *anionic* mechanisms of the Co-mediated dehydrogenative dimerization of AQ-directed benzamides calculated by the M06 density functional.

| Basis sets/Activation barrier (kcal/mol) | Neutral pathway (C-H activation) | Neutral pathway (C-C coupling) | Anionic pathway |
|------------------------------------------|----------------------------------|--------------------------------|-----------------|
| 6-31G(d,p)/Lanl2dz, BS1                  | 31.3                             | 24.1                           | 24.4            |
| 6-311++G(d,p)/SDD, BS2                   | 31.8                             | 22.9                           | 26.5            |

We also have validated the impact of the used basis sets (i.e. BS1) to the calculated critical energy barriers. For this reason, we performed single-point energy calculations (at the previously optimized geometries, at the B3LYP-D3BJ/BS1 and M06/BS1 levels of theory, respectively) of the C–H activation and C–C coupling transition states and associated pre-reaction complexes of the *charge neutral* and *anionic* pathways of the of the Co-mediated dehydrogenative dimerization of AQ-directed benzamides at the B3LYP-D3BJ/BS2 and M06/BS2 levels, where basis set BS2 = [6-311++G(d,p)] (for all atoms except Co) + SDD (and associated ECP for Co) and is larger than BS1. We found that at the M06/BS2//M06/BS1 level, the rate-determining C–H bond activation step of the *charge neutral* pathway requires a 31.8 kcal/mol free energy barrier. However, the free energy barrier required for the rate-limiting C–C coupling for the *anionic* pathway increased by 2.1 kcal, i.e. to 26.5 kcal/mol.

**Table S9.** Free energy barriers of the rate-limiting steps of the *charge neutral* and *anionic* mechanisms of the Co-mediated dehydrogenative dimerization of AQ-directed benzamides calculated by the B3LYP-D3BJ density functional.

| Basis sets/Activation barrier (kcal/mol) | Neutral pathway (C-H activation) | Neutral pathway (C-C coupling) | Anionic pathway |
|------------------------------------------|----------------------------------|--------------------------------|-----------------|
| 6-31G(d,p)/Lanl2dz, BS1                  | 32.8                             | 32.6                           | 29.5            |
| 6-311++G(d,p)/SDD, BS2                   | 33.2                             | 33.5                           | 32.3            |

### 13. Meta-C-H activation: barriers and transition states.

We have examined the meta-C-H activation process. However, because of the significant aminoquinoline (AQ) ring constrains in the metallacycle structures, direct search for the meta-C-H activation transition states (TSs) in these metallacycles were failed: All our efforts led to dissociation of the coordinated AQ ligand. These results prompted us to extend our investigations and identify the meta-C-H TSs along with the dissociation of the binding ligand (see Figure S20). As you can see from the Table S10,

the calculated meta-C-H activation barriers are prohibitively high.

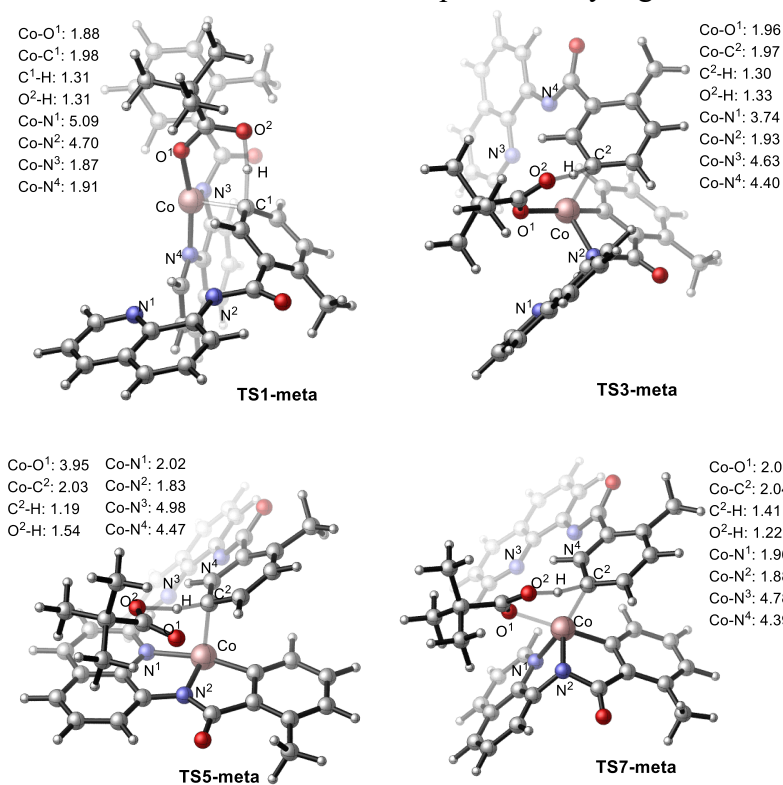

**Figure S20.** Geometries and key bond distances (in Å) for the meta-C-H activation TSs.

**Table S10.** Activation Barriers for the ortho- and meta-C-H Activation for **TS1**, **TS3**, **TS5**, and **TS7**.

| TS         | $\Delta G^\ddagger$ (ortho-C-H) | $\Delta G^\ddagger$ (meta-C-H) |
|------------|---------------------------------|--------------------------------|
| <b>TS1</b> | 5.1 kcal/mol                    | 76.2 kcal/mol                  |
| <b>TS3</b> | 32.8 kcal/mol                   | 110.0 kcal/mol                 |
| <b>TS5</b> | 22.2 kcal/mol                   | 92.7 kcal/mol                  |
| <b>TS7</b> | 27.4 kcal/mol                   | 77.9 kcal/mol                  |

14. Distances between aryl ring and quinoline moiety in **Co<sup>II</sup>(BQN)<sub>2</sub>** showing the  $\pi$ - $\pi$  stacking interactions.

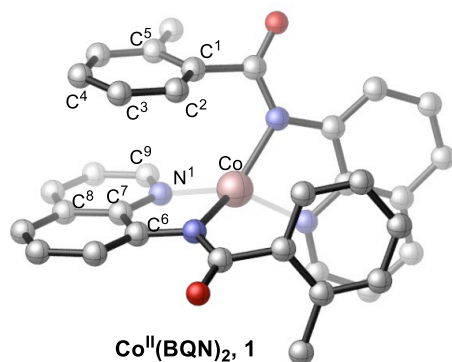

Bond distances (Å):

|                                       |                                       |                                       |
|---------------------------------------|---------------------------------------|---------------------------------------|
| C <sup>1</sup> -N <sup>1</sup> : 3.37 | C <sup>2</sup> -C <sup>6</sup> : 3.57 | C <sup>3</sup> -C <sup>6</sup> : 3.44 |
| C <sup>3</sup> -C <sup>7</sup> : 3.48 | C <sup>4</sup> -C <sup>7</sup> : 3.59 | C <sup>4</sup> -C <sup>8</sup> : 3.61 |
| C <sup>5</sup> -C <sup>9</sup> : 3.42 |                                       |                                       |

**Figure S21.** Calculated key distances between the aryl ring and the aminoquinoline moiety (hydrogen atoms are omitted for clarity).

### 15. C-H activation on Co(III) species with one AQ ligand and two PivO<sup>-</sup> ligands.

We have calculated C-H activation in the Co(III) species with one AQ ligand and two PivO<sup>-</sup>, i.e., in the Co(III)(BQNH)(PivO)<sub>2</sub> species. In general, we found that in this species the C-H cleavage occurs with a slightly larger energy barrier.

As shown in Figure S22, the same-state-to-same-state C-H activation barrier in Co(III)(BQNH)(PivO)<sub>2</sub> (with one AQ ligand, called as **1a-1AQ**) is 5.6 kcal/mol, while that is 5.1 kcal/mol in the species **1a** (with two AQ ligand). Moreover, if we consider the more stable quintet spin state of the pre-reaction complex (**1a-1AQ**, Figure S22), then the activation barrier increases to 13.6 kcal/mol. Thus, in the Co(III) complex with one AQ ligand, the C-H activation occurs with higher energy barrier.

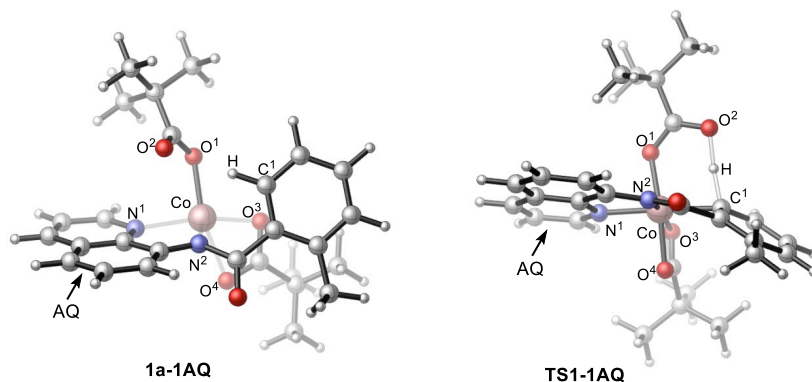

|                | $\Delta G(\Delta H)$<br>(kcal/mol) | spin density ( e ) |                |                |                |                |             |                   | bond distances (Å) |                   |                   |                   |                   |                   |                   |      |
|----------------|------------------------------------|--------------------|----------------|----------------|----------------|----------------|-------------|-------------------|--------------------|-------------------|-------------------|-------------------|-------------------|-------------------|-------------------|------|
|                |                                    | Co                 | N <sup>2</sup> | O <sup>1</sup> | O <sup>3</sup> | O <sup>4</sup> | $\Sigma$ AQ | Co-N <sup>1</sup> | Co-N <sup>2</sup>  | Co-O <sup>1</sup> | Co-O <sup>3</sup> | Co-O <sup>4</sup> | Co-C <sup>1</sup> | O <sup>2</sup> -H | C <sup>1</sup> -H |      |
| <b>1a-1AQ</b>  | singlet                            | 0.0(0.0)           | -              | -              | -              | -              | -           | -                 | 1.91               | 1.89              | 1.88              | 1.98              | 1.96              | 2.38              | 2.11              | 1.09 |
|                | triplet                            | 0.1(5.2)           | 1.77           | 0.03           | 0.02           | -0.03          | 0.01        | 0.14              | 2.10               | 1.86              | 1.87              | 1.98              | 1.98              | 2.95              | 2.17              | 1.09 |
|                | quintet                            | -8.0(-2.8)         | 2.71           | 0.48           | 0.08           | 0.06           | 0.06        | 0.58              | 2.15               | 2.13              | 1.96              | 2.06              | 2.21              | 3.30              | 2.31              | 1.09 |
| <b>TS1-1AQ</b> | singlet                            | 5.6(4.9)           | -              | -              | -              | -              | -           | -                 | 1.96               | 1.89              | 1.92              | 1.98              | 1.96              | 2.07              | 1.31              | 1.30 |
|                | triplet                            | 11.7(13.7)         | 1.84           | 0.06           | 0.10           | 0.01           | 0.06        | 0.02              | 1.98               | 1.87              | 2.08              | 1.96              | 2.33              | 2.08              | 1.38              | 1.27 |
|                | quintet                            | 17.5(22.3)         | 2.67           | 0.43           | 0.05           | 0.06           | 0.06        | 0.54              | 2.15               | 2.09              | 2.13              | 2.10              | 2.19              | 2.22              | 1.16              | 1.49 |

**Figure S22.** Energies, spin densities and bond distances for the singlet, triplet, and quintet spin states for the intermediate (**1a-1AQ**) and transition state (**TS1-1AQ**) with one AQ ligand.

## 16. C-H activation on the Co(II) species with closed-shell BQN ligand.

We have calculated the C-H cleavage barrier in the Co(II) complex with closed-shell BQN ligand (complex **2**). The counter cation,  $\text{PPh}_4^+$ , is not included to these model calculations. For the corresponding quartet and doublet spin state species, we found that the C-H cleavage occurs with over 30.8 kcal/mol activation barriers, which are much higher than that (only 5.1 kcal/mol) reported for **1a**.

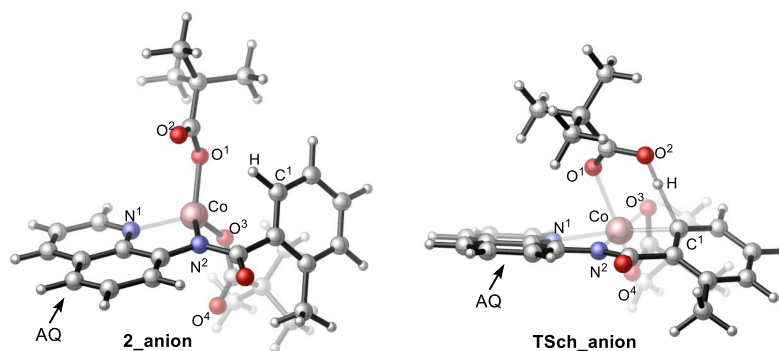

|                   | $\Delta G(\Delta H)$<br>(kcal/mol) | spin density ( e ) |                |                |                |                |             | bond distances (Å) |                   |                   |                   |                   |                   |                   |                   |      |
|-------------------|------------------------------------|--------------------|----------------|----------------|----------------|----------------|-------------|--------------------|-------------------|-------------------|-------------------|-------------------|-------------------|-------------------|-------------------|------|
|                   |                                    | Co                 | N <sup>2</sup> | O <sup>1</sup> | O <sup>3</sup> | O <sup>4</sup> | $\Sigma$ AQ | Co-N <sup>1</sup>  | Co-N <sup>2</sup> | Co-O <sup>1</sup> | Co-O <sup>3</sup> | Co-O <sup>4</sup> | Co-C <sup>1</sup> | O <sup>2</sup> -H | C <sup>1</sup> -H |      |
| <b>2_anion</b>    | doublet                            | 16.9(14.7)         | 0.97           | -0.02          | 0              | -0.01          | -0.01       | 0.06               | 2.15              | 1.95              | 1.95              | 2.01              | 2.04              | 2.91              | 2.19              | 1.09 |
|                   | quartet                            | 0.0(0.0)           | 2.68           | 0.07           | 0.07           | 0.08           | 0.01        | 0.06               | 2.08              | 2.03              | 1.97              | 1.95              | 3.16              | 3.07              | 2.61              | 1.09 |
| <b>TSch_anion</b> | doublet                            | 31.4(28.5)         | 1.02           | -0.02          | 0.03           | -0.01          | 0.02        | 0.02               | 1.97              | 1.92              | 2.28              | 1.95              | 2.61              | 2.07              | 1.28              | 1.37 |
|                   | quartet                            | 30.8(29.2)         | 2.65           | 0.07           | 0.03           | 0.04           | 0.05        | 0.04               | 2.19              | 2.06              | 2.23              | 2.25              | 2.14              | 2.18              | 1.10              | 1.60 |

**Figure S23.** Energies, spin densities and bond distances for the doublet and quartet spin states for the intermediate (**2\_anion**) and transition state (**TSch\_anion**) for Co(II) complexes with closed-shell BQN ligand.

### 17. C-C coupling after the dissociation of PivOH from the complex **D'**.

We have calculated the C-C coupling after the dissociation of pivalic acid (PivOH) from **D'** (see **TS6**). The results show that this process (Figure S24, red pathway) is by 4.2 kcal/mol less favorable than that without pivalic acid dissociation (Figure S24, black pathway).

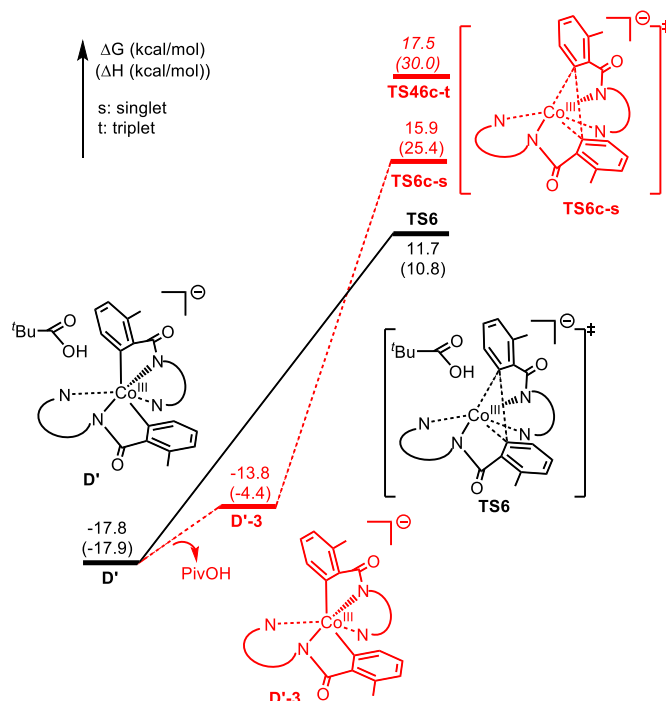

**Figure S24.** Comparison of the C-C coupling process from complex **D'** with (in black) and without (in red) presence of PivOH.

18. The calculated total energies (in hartree) and cartesian coordinates (in Å) for all reported structures.



**1-q**

Energy = -2172.52262291 ZPE = -2171.864445  
 H = -2171.819964, G = -2171.942912

|   |           |           |           |
|---|-----------|-----------|-----------|
| C | -2.177630 | 1.970234  | 0.659149  |
| C | -2.983502 | 3.140528  | 0.589029  |
| C | -4.314473 | 3.109772  | 1.005892  |
| C | -4.893858 | 1.946920  | 1.508361  |
| C | -4.136453 | 0.743717  | 1.604801  |
| C | -2.787392 | 0.750541  | 1.174385  |
| N | -2.011702 | -0.352380 | 1.206489  |
| C | -2.514364 | -1.489511 | 1.678536  |
| C | -3.834306 | -1.590715 | 2.151408  |
| C | -4.650716 | -0.475750 | 2.105143  |
| N | -0.891454 | 1.873528  | 0.323424  |
| H | -4.908688 | 4.014900  | 0.939086  |
| H | -5.929186 | 1.945825  | 1.833851  |
| H | -5.680585 | -0.524028 | 2.444948  |
| H | -4.197871 | -2.539384 | 2.528583  |
| H | -1.846102 | -2.343918 | 1.655562  |
| C | -0.197169 | 2.919144  | -0.344119 |
| C | 1.109512  | 3.274904  | 0.261910  |
| C | 2.164012  | 3.795352  | -0.524097 |
| C | 1.276066  | 3.094697  | 1.643953  |
| C | 3.357367  | 4.126817  | 0.128732  |
| C | 2.468998  | 3.441798  | 2.272446  |
| C | 3.513785  | 3.961706  | 1.506737  |
| H | 0.455952  | 2.685966  | 2.225574  |
| H | 4.185819  | 4.510888  | -0.459941 |
| H | 2.582154  | 3.305170  | 3.343295  |
| H | 4.454758  | 4.230503  | 1.977759  |
| O | -0.658086 | 3.423673  | -1.359613 |
| H | -2.552812 | 4.052959  | 0.196614  |
| C | 2.064384  | 3.939035  | -2.021738 |
| H | 1.717124  | 3.003626  | -2.470607 |
| H | 1.343488  | 4.710496  | -2.303703 |
| H | 3.038371  | 4.193170  | -2.447783 |
| C | 0.844812  | -2.881481 | 0.025520  |
| C | 1.293760  | -4.136601 | -0.391445 |
| C | 2.313672  | -4.816000 | 0.311413  |
| C | 2.905941  | -4.285367 | 1.438554  |
| C | 2.479747  | -3.018256 | 1.912129  |
| C | 1.457057  | -2.317746 | 1.204854  |
| N | 1.027957  | -1.087299 | 1.620662  |
| C | 1.547607  | -0.534195 | 2.705755  |
| C | 2.553007  | -1.161475 | 3.470224  |
| C | 3.018837  | -2.393851 | 3.066560  |
| N | -0.128214 | -2.089081 | -0.559550 |
| H | 2.636171  | -5.786068 | -0.056931 |
| H | 3.688209  | -4.817795 | 1.970707  |
| H | 3.801673  | -2.900942 | 3.623815  |
| H | 2.948555  | -0.664841 | 4.349112  |
| H | 1.173012  | 0.449464  | 2.970115  |
| C | -0.974759 | -2.513197 | -1.531592 |
| C | -2.012302 | -1.458404 | -1.858019 |
| C | -3.378950 | -1.716997 | -1.618422 |
| C | -1.601351 | -0.195992 | -2.316398 |
| C | -4.288910 | -0.667666 | -1.790431 |
| C | -2.531269 | 0.833240  | -2.496465 |
| C | -3.875595 | 0.600974  | -2.212746 |
| H | -0.549958 | -0.036830 | -2.544454 |
| H | -5.340578 | -0.843662 | -1.577982 |
| H | -2.191397 | 1.813844  | -2.812562 |
| H | -4.605687 | 1.398084  | -2.319955 |
| O | -1.012365 | -3.628374 | -2.080661 |

|    |           |           |           |
|----|-----------|-----------|-----------|
| H  | 0.844231  | -4.579986 | -1.267873 |
| C  | -3.851436 | -3.077037 | -1.161802 |
| H  | -4.919872 | -3.065222 | -0.930952 |
| H  | -3.660898 | -3.831105 | -1.930321 |
| H  | -3.313867 | -3.408448 | -0.267226 |
| Co | -0.140598 | -0.134213 | 0.136127  |
| C  | 2.123379  | -0.046020 | -1.819351 |
| O  | 1.353889  | 0.542312  | -0.956237 |
| O  | 1.731107  | -0.482981 | -2.910476 |
| C  | 3.631951  | -0.144332 | -1.469357 |
| C  | 4.071365  | -1.609720 | -1.657518 |
| H  | 5.149385  | -1.709533 | -1.485236 |
| H  | 3.551905  | -2.269304 | -0.954323 |
| H  | 3.844762  | -1.949374 | -2.671310 |
| C  | 4.388547  | 0.755796  | -2.469101 |
| H  | 4.117586  | 1.808425  | -2.331983 |
| H  | 5.471085  | 0.664461  | -2.322767 |
| H  | 4.149353  | 0.470682  | -3.497411 |
| C  | 3.926082  | 0.311296  | -0.034138 |
| H  | 5.006649  | 0.288590  | 0.152360  |
| H  | 3.563562  | 1.325883  | 0.139993  |
| H  | 3.444645  | -0.346100 | 0.692714  |

**1-s**

Energy = -2172.52822239 ZPE = -2171.865903  
 H = -2171.823172 G = -2171.938722

|   |           |           |           |
|---|-----------|-----------|-----------|
| C | -1.865158 | 2.095825  | 0.909040  |
| C | -2.464159 | 3.335683  | 1.129537  |
| C | -3.804484 | 3.424199  | 1.566428  |
| C | -4.578973 | 2.305575  | 1.802724  |
| C | -4.015166 | 1.022511  | 1.592568  |
| C | -2.672171 | 0.940962  | 1.126343  |
| N | -2.085032 | -0.263327 | 0.861543  |
| C | -2.739688 | -1.394435 | 1.091438  |
| C | -4.061412 | -1.399611 | 1.574409  |
| C | -4.698439 | -0.199149 | 1.811212  |
| N | -0.532289 | 1.838494  | 0.583158  |
| H | -4.229207 | 4.411514  | 1.722972  |
| H | -5.606003 | 2.389555  | 2.142464  |
| H | -5.723708 | -0.177487 | 2.168965  |
| H | -4.558630 | -2.348063 | 1.740503  |
| H | -2.210003 | -2.312718 | 0.873016  |
| C | 0.212726  | 2.831800  | -0.037233 |
| C | 1.682575  | 2.862052  | 0.256096  |
| C | 2.631592  | 3.179221  | -0.740615 |
| C | 2.086460  | 2.714035  | 1.587323  |
| C | 3.965493  | 3.338278  | -0.348849 |
| C | 3.420179  | 2.884171  | 1.960618  |
| C | 4.363900  | 3.200190  | 0.984500  |
| H | 1.335243  | 2.492753  | 2.337028  |
| H | 4.709616  | 3.573858  | -1.105280 |
| H | 3.714258  | 2.776208  | 3.000461  |
| H | 5.407635  | 3.335947  | 1.253130  |
| O | -0.289937 | 3.718287  | -0.739304 |
| H | -1.900451 | 4.241911  | 0.955096  |
| C | 2.249191  | 3.302239  | -2.196738 |
| H | 1.753669  | 2.389195  | -2.543252 |
| H | 1.552541  | 4.128889  | -2.350981 |
| H | 3.134930  | 3.461974  | -2.817539 |
| C | 0.461681  | -2.777490 | 0.118332  |
| C | 0.817576  | -4.089634 | -0.178797 |
| C | 1.557880  | -4.848042 | 0.760361  |
| C | 1.940100  | -4.341642 | 1.986674  |
| C | 1.582602  | -3.012582 | 2.334232  |

|                         |                    |           |           |    |           |           |           |
|-------------------------|--------------------|-----------|-----------|----|-----------|-----------|-----------|
| C                       | 0.853183           | -2.250073 | 1.385337  | H  | 2.108139  | 2.314074  | 1.330832  |
| N                       | 0.474794           | -0.962244 | 1.656129  | C  | -0.314161 | -2.748978 | -0.016644 |
| C                       | 0.750687           | -0.394726 | 2.818800  | C  | -1.714974 | -2.783961 | 0.483033  |
| C                       | 1.459013           | -1.095262 | 3.816695  | C  | -2.748560 | -3.397774 | -0.265131 |
| C                       | 1.881533           | -2.385517 | 3.571441  | C  | -1.989577 | -2.240171 | 1.747004  |
| N                       | -0.269369          | -1.867987 | -0.634179 | C  | -4.032021 | -3.420046 | 0.297457  |
| H                       | 1.828633           | -5.866063 | 0.496830  | C  | -3.268531 | -2.286101 | 2.291530  |
| H                       | 2.499550           | -4.944366 | 2.694487  | C  | -4.297356 | -2.877797 | 1.556373  |
| H                       | 2.439757           | -2.935153 | 4.323343  | H  | -1.177432 | -1.777962 | 2.293755  |
| H                       | 1.666878           | -0.600518 | 4.758010  | H  | -4.841884 | -3.871530 | -0.269147 |
| H                       | 0.412707           | 0.624490  | 2.947785  | H  | -3.460869 | -1.860703 | 3.271718  |
| C                       | -0.972160          | -2.150684 | -1.771204 | H  | -5.305681 | -2.916811 | 1.958431  |
| C                       | -1.879026          | -1.005965 | -2.149482 | O  | 0.126558  | -3.564667 | -0.820907 |
| C                       | -3.267635          | -1.217234 | -2.267101 | H  | 1.878404  | -4.197103 | 0.630192  |
| C                       | -1.351939          | 0.301194  | -2.201945 | C  | -2.530992 | -3.984556 | -1.638318 |
| C                       | -4.088991          | -0.090018 | -2.401147 | H  | -2.013862 | -3.268050 | -2.281805 |
| C                       | -2.198910          | 1.411807  | -2.323950 | H  | -1.906268 | -4.880003 | -1.589578 |
| C                       | -3.572225          | 1.211248  | -2.413702 | H  | -3.488806 | -4.246269 | -2.096202 |
| H                       | -0.268078          | 0.421231  | -2.276567 | C  | -0.584884 | 2.777662  | -0.154190 |
| H                       | -5.163878          | -0.234439 | -2.474154 | C  | -1.037398 | 3.927043  | -0.798763 |
| H                       | -1.772409          | 2.409360  | -2.312602 | C  | -2.014036 | 4.755553  | -0.200252 |
| H                       | -4.247671          | 2.057564  | -2.495118 | C  | -2.550553 | 4.472230  | 1.037714  |
| O                       | -0.955677          | -3.231201 | -2.371736 | C  | -2.116115 | 3.316149  | 1.736859  |
| H                       | 0.525154           | -4.514226 | -1.128110 | C  | -1.140805 | 2.468200  | 1.136512  |
| C                       | -3.874260          | -2.598142 | -2.189160 | N  | -0.699031 | 1.338603  | 1.760989  |
| H                       | -4.959889          | -2.553795 | -2.305692 | C  | -1.151756 | 1.031390  | 2.964083  |
| H                       | -3.457121          | -3.255389 | -2.955134 | C  | -2.109834 | 1.817574  | 3.640118  |
| H                       | -3.656877          | -3.068552 | -1.223301 | C  | -2.595939 | 2.948017  | 3.020406  |
| Co                      | -0.268273          | -0.092485 | 0.130371  | N  | 0.366353  | 1.873859  | -0.619194 |
| C                       | 2.148264           | -0.222919 | -1.522811 | H  | -2.343683 | 5.638205  | -0.740338 |
| O                       | 1.577771           | 0.090884  | -0.399083 | H  | -3.295908 | 5.119004  | 1.490146  |
| O                       | 1.615107           | -0.199763 | -2.640328 | H  | -3.343856 | 3.569758  | 3.504406  |
| C                       | 3.626686           | -0.669255 | -1.394005 | H  | -2.452063 | 1.517544  | 4.624173  |
| C                       | 3.673909           | -2.148466 | -1.837715 | H  | -0.754213 | 0.128046  | 3.416249  |
| H                       | 4.707422           | -2.512090 | -1.815895 | C  | 1.291553  | 2.171198  | -1.587808 |
| H                       | 3.076990           | -2.779317 | -1.171386 | C  | 2.243259  | 1.038953  | -1.872516 |
| H                       | 3.285956           | -2.259546 | -2.853842 | C  | 3.637938  | 1.248856  | -1.788038 |
| C                       | 4.477973           | 0.182601  | -2.353850 | C  | 1.736567  | -0.240445 | -2.148073 |
| H                       | 4.475853           | 1.233122  | -2.049671 | C  | 4.477767  | 0.138905  | -1.934599 |
| H                       | 5.515453           | -0.169869 | -2.351997 | C  | 2.597578  | -1.331185 | -2.300376 |
| H                       | 4.087820           | 0.117578  | -3.372571 | C  | 3.971751  | -1.142199 | -2.180052 |
| C                       | 4.148651           | -0.541910 | 0.043481  | H  | 0.665815  | -0.392715 | -2.277229 |
| H                       | 5.193209           | -0.871818 | 0.089393  | H  | 5.551625  | 0.279379  | -1.841396 |
| H                       | 4.094572           | 0.491103  | 0.392677  | H  | 2.180492  | -2.317603 | -2.475765 |
| H                       | 3.562244           | -1.160975 | 0.728279  | H  | 4.653345  | -1.982758 | -2.272318 |
|                         |                    |           |           | O  | 1.406066  | 3.263463  | -2.160612 |
|                         |                    |           |           | H  | -0.627241 | 4.182990  | -1.764286 |
| <b>1-t</b>              |                    |           |           | C  | 4.225665  | 2.611879  | -1.508855 |
| Energy = -2172.52526585 | ZPE = -2171.864091 | H =       |           | H  | 5.306518  | 2.546182  | -1.359777 |
| -2171.821058            | G = -2171.938126   |           |           | H  | 4.021169  | 3.301044  | -2.332171 |
| C                       | 1.840352           | -2.053333 | 0.826861  | H  | 3.785812  | 3.063090  | -0.613578 |
| C                       | 2.438325           | -3.313065 | 0.901499  | Co | 0.267221  | 0.129903  | 0.230486  |
| C                       | 3.779987           | -3.440652 | 1.325391  | C  | -1.969883 | -0.287326 | -1.587878 |
| C                       | 4.545721           | -2.350370 | 1.691682  | O  | -1.524589 | 0.006427  | -0.409939 |
| C                       | 3.975677           | -1.050360 | 1.639471  | O  | -1.328349 | -0.850985 | -2.486610 |
| C                       | 2.638780           | -0.926509 | 1.183407  | C  | -3.419373 | 0.193215  | -1.848899 |
| N                       | 2.028229           | 0.281982  | 1.063920  | C  | -3.281500 | 1.467626  | -2.712869 |
| C                       | 2.656495           | 1.387245  | 1.446763  | H  | -4.273113 | 1.866614  | -2.955305 |
| C                       | 3.973239           | 1.352382  | 1.939715  | H  | -2.722898 | 2.242542  | -2.178332 |
| C                       | 4.637637           | 0.142836  | 2.016127  | H  | -2.758750 | 1.246363  | -3.648328 |
| N                       | 0.519271           | -1.737921 | 0.531692  | C  | -4.185668 | -0.884074 | -2.634029 |
| H                       | 4.212630           | -4.435415 | 1.367348  | H  | -4.345864 | -1.774879 | -2.020019 |
| H                       | 5.571871           | -2.470887 | 2.023055  | H  | -5.165904 | -0.501159 | -2.939329 |
| H                       | 5.663510           | 0.095964  | 2.368945  | H  | -3.629284 | -1.178871 | -3.526581 |
| H                       | 4.453474           | 2.278717  | 2.232005  |    |           |           |           |

|                                                |           |           |           |                                                 |           |           |           |
|------------------------------------------------|-----------|-----------|-----------|-------------------------------------------------|-----------|-----------|-----------|
| C                                              | -4.157745 | 0.527388  | -0.543721 | H                                               | 4.691140  | -0.763222 | 2.231703  |
| H                                              | -5.178731 | 0.857575  | -0.768629 | H                                               | 5.007815  | -1.838057 | 0.856925  |
| H                                              | -4.214143 | -0.348040 | 0.109226  | C                                               | 5.451700  | 0.130546  | -1.045364 |
| H                                              | -3.648333 | 1.324337  | 0.003262  | H                                               | 5.117816  | 0.901166  | -1.746006 |
| <b>20q</b>                                     |           |           |           | H                                               | 6.533218  | 0.235301  | -0.905774 |
| Energy = -1678.48279594 ZPE = -1677.950014 H = |           |           |           | H                                               | 5.255245  | -0.843486 | -1.502420 |
| -1677.913006 G = -1678.023115                  |           |           |           | C                                               | 5.007141  | 1.648243  | 0.922900  |
| C                                              | -1.506739 | 1.047259  | -1.475787 | H                                               | 6.081031  | 1.779859  | 1.094174  |
| C                                              | -2.661052 | 1.299027  | -2.268842 | H                                               | 4.671837  | 2.449991  | 0.254803  |
| C                                              | -3.024674 | 2.607335  | -2.600131 | H                                               | 4.485762  | 1.755333  | 1.877779  |
| C                                              | -2.274225 | 3.701263  | -2.184223 | <b>20s</b>                                      |           |           |           |
| C                                              | -1.094109 | 3.514110  | -1.408104 | Energy = -1678.52738508 ZPE = -1677.99001 H = - |           |           |           |
| C                                              | -0.704616 | 2.195997  | -1.061421 | 1677.954826 G = -1678.056216                    |           |           |           |
| N                                              | 0.414506  | 1.943095  | -0.347193 | C                                               | -1.600493 | 0.285508  | -1.589157 |
| C                                              | 1.170592  | 2.956657  | 0.063784  | C                                               | -2.618245 | -0.022876 | -2.491120 |
| C                                              | 0.862326  | 4.298222  | -0.227275 | C                                               | -3.633424 | 0.921312  | -2.770984 |
| C                                              | -0.271224 | 4.577623  | -0.966007 | C                                               | -3.665036 | 2.169175  | -2.181653 |
| N                                              | -1.039736 | -0.131282 | -1.045470 | C                                               | -2.646105 | 2.527078  | -1.261465 |
| H                                              | -3.917328 | 2.768779  | -3.195493 | C                                               | -1.620766 | 1.582891  | -0.974948 |
| H                                              | -2.574538 | 4.709528  | -2.452092 | N                                               | -0.614676 | 1.862971  | -0.093579 |
| H                                              | -0.539734 | 5.600324  | -1.212593 | C                                               | -0.572162 | 3.035327  | 0.516120  |
| H                                              | 1.513116  | 5.088683  | 0.128341  | C                                               | -1.544364 | 4.033409  | 0.287510  |
| H                                              | 2.043135  | 2.682736  | 0.648108  | C                                               | -2.573426 | 3.777558  | -0.593487 |
| C                                              | -1.622495 | -1.395309 | -1.319324 | N                                               | -0.552238 | -0.519160 | -1.173683 |
| C                                              | -0.698097 | -2.507222 | -0.969408 | H                                               | -4.411813 | 0.643470  | -3.476012 |
| C                                              | -0.955714 | -3.834863 | -1.406088 | H                                               | -4.453460 | 2.879916  | -2.408460 |
| C                                              | 0.421584  | -2.171435 | -0.157629 | H                                               | -3.337852 | 4.525226  | -0.785375 |
| C                                              | -0.055309 | -4.826437 | -1.003656 | H                                               | -1.470206 | 4.980866  | 0.809265  |
| C                                              | 1.278181  | -3.215891 | 0.220650  | H                                               | 0.250984  | 3.184055  | 1.207569  |
| C                                              | 1.046080  | -4.529302 | -0.193770 | C                                               | -0.225829 | -1.757777 | -1.664298 |
| H                                              | -0.883724 | -1.912093 | 1.453671  | C                                               | 0.937576  | -2.318001 | -0.898081 |
| H                                              | -0.220590 | -5.850732 | -1.328037 | C                                               | 1.511980  | -3.587095 | -1.141426 |
| H                                              | 2.141620  | -2.998619 | 0.847392  | C                                               | 1.417470  | -1.487372 | 0.137526  |
| H                                              | 1.718535  | -5.329741 | 0.107194  | C                                               | 2.572185  | -3.982056 | -0.313323 |
| O                                              | -2.764211 | -1.529739 | -1.758663 | C                                               | 2.470010  | -1.911007 | 0.948575  |
| H                                              | -3.260000 | 0.459567  | -2.590024 | C                                               | 3.044894  | -3.165209 | 0.717547  |
| C                                              | -2.129484 | -4.218192 | -2.275770 | H                                               | -0.258089 | -2.395528 | 0.961642  |
| H                                              | -2.042651 | -5.259647 | -2.598628 | H                                               | 3.031915  | -4.953204 | -0.477461 |
| H                                              | -3.074588 | -4.094651 | -1.738795 | H                                               | 2.840371  | -1.268458 | 1.741366  |
| H                                              | -2.202064 | -3.579091 | -3.160442 | H                                               | 3.865134  | -3.510878 | 1.341784  |
| Co                                             | 0.711962  | -0.142775 | 0.182533  | O                                               | -0.813760 | -2.340791 | -2.585454 |
| C                                              | -1.657108 | -0.326994 | 2.140555  | H                                               | -2.618072 | -0.990875 | -2.970606 |
| O                                              | -0.658882 | 0.344838  | 1.879309  | C                                               | 1.028653  | -4.506870 | -2.236245 |
| O                                              | -1.709611 | -1.637252 | 1.922071  | H                                               | 1.632880  | -5.417875 | -2.268238 |
| C                                              | -2.959359 | 0.269757  | 2.655052  | H                                               | -0.019422 | -4.781022 | -2.085833 |
| C                                              | -3.530111 | -0.590571 | 3.799302  | H                                               | 1.070514  | -4.015910 | -3.212122 |
| H                                              | -4.476769 | -0.159697 | 4.139278  | Co                                              | 0.537140  | 0.213320  | 0.186839  |
| H                                              | -3.715268 | -1.615815 | 3.471022  | C                                               | -1.509151 | -1.217858 | 1.744489  |
| H                                              | -2.843580 | -0.618796 | 4.651543  | O                                               | -0.796614 | -0.217386 | 1.572838  |
| C                                              | -2.713012 | 1.710516  | 3.124936  | O                                               | -1.148327 | -2.431636 | 1.384814  |
| H                                              | -2.307226 | 2.322526  | 2.315434  | C                                               | -2.904815 | -1.107677 | 2.331701  |
| H                                              | -3.656248 | 2.153082  | 3.458595  | C                                               | -3.112424 | -2.178069 | 3.420910  |
| H                                              | -2.005093 | 1.738096  | 3.958679  | H                                               | -4.135503 | -2.109366 | 3.801900  |
| C                                              | -3.935325 | 0.264427  | 1.449933  | H                                               | -2.957906 | -3.184224 | 3.024533  |
| H                                              | -4.898687 | 0.676299  | 1.765638  | H                                               | -2.425421 | -2.025252 | 4.259236  |
| H                                              | -3.553307 | 0.880578  | 0.629921  | C                                               | -3.120350 | 0.303809  | 2.897867  |
| H                                              | -4.095254 | -0.748990 | 1.072916  | H                                               | -2.988051 | 1.063352  | 2.123155  |
| C                                              | 3.213880  | 0.118109  | 0.126139  | H                                               | -4.136998 | 0.382157  | 3.293430  |
| O                                              | 2.692660  | -0.064040 | -1.003817 | H                                               | -2.417210 | 0.517294  | 3.708083  |
| O                                              | 2.477087  | 0.197527  | 1.180477  | C                                               | -3.875110 | -1.355086 | 1.145620  |
| C                                              | 4.731632  | 0.261586  | 0.303412  | H                                               | -4.903983 | -1.250676 | 1.502568  |
| C                                              | 5.206055  | -0.843003 | 1.271051  | H                                               | -3.713103 | -0.629280 | 0.342325  |
| H                                              | 6.284551  | -0.756391 | 1.442900  | H                                               | -3.748525 | -2.360228 | 0.735511  |

|   |          |          |           |
|---|----------|----------|-----------|
| C | 2.523032 | 1.407553 | 0.223894  |
| O | 1.988973 | 0.971469 | -0.854225 |
| O | 1.896412 | 1.131895 | 1.303518  |
| C | 3.817960 | 2.196381 | 0.235170  |
| C | 4.827712 | 1.412805 | 1.103082  |
| H | 5.773441 | 1.961510 | 1.151740  |
| H | 4.447291 | 1.281230 | 2.119258  |
| H | 5.026259 | 0.423231 | 0.678443  |
| C | 4.353425 | 2.371137 | -1.193052 |
| H | 3.637960 | 2.910773 | -1.819842 |
| H | 5.288209 | 2.939693 | -1.167493 |
| H | 4.551222 | 1.402834 | -1.661260 |
| C | 3.525713 | 3.569990 | 0.878528  |
| H | 4.450216 | 4.152869 | 0.937000  |
| H | 2.802122 | 4.137111 | 0.283390  |
| H | 3.125791 | 3.450588 | 1.888944  |

**20t**

Energy = -1678.52346142 ZPE = -1677.987667 H =  
-1677.951549 G = -1678.056629

|    |           |           |           |
|----|-----------|-----------|-----------|
| C  | -1.700767 | 0.328077  | -1.546603 |
| C  | -2.853290 | 0.073630  | -2.284614 |
| C  | -3.785302 | 1.111204  | -2.531874 |
| C  | -3.599383 | 2.394961  | -2.063901 |
| C  | -2.434023 | 2.698546  | -1.311435 |
| C  | -1.493818 | 1.661685  | -1.065918 |
| N  | -0.354373 | 1.883567  | -0.343226 |
| C  | -0.103141 | 3.085347  | 0.152186  |
| C  | -0.980558 | 4.171075  | -0.045451 |
| C  | -2.137202 | 3.976807  | -0.773051 |
| N  | -0.696527 | -0.565255 | -1.177239 |
| H  | -4.674997 | 0.874474  | -3.107745 |
| H  | -4.327250 | 3.176188  | -2.258169 |
| H  | -2.831663 | 4.795592  | -0.937922 |
| H  | -0.737028 | 5.138350  | 0.378779  |
| H  | 0.812237  | 3.178665  | 0.727280  |
| C  | -0.622111 | -1.900117 | -1.544538 |
| C  | 0.531163  | -2.542670 | -0.844108 |
| C  | 0.883037  | -3.905368 | -0.962938 |
| C  | 1.251489  | -1.683156 | 0.004509  |
| C  | 1.970754  | -4.353218 | -0.200083 |
| C  | 2.325231  | -2.148854 | 0.758284  |
| C  | 2.678934  | -3.498508 | 0.649653  |
| H  | -0.491635 | -2.207304 | 1.338135  |
| H  | 2.264482  | -5.397219 | -0.269063 |
| H  | 2.871553  | -1.477328 | 1.412026  |
| H  | 3.511202  | -3.888287 | 1.229939  |
| O  | -1.401775 | -2.468899 | -2.311213 |
| H  | -3.029591 | -0.922564 | -2.663032 |
| C  | 0.134754  | -4.863106 | -1.856649 |
| H  | 0.577894  | -5.861358 | -1.807805 |
| H  | -0.918468 | -4.927498 | -1.568894 |
| H  | 0.141960  | -4.521447 | -2.895372 |
| Co | 0.625047  | 0.142452  | -0.026775 |
| C  | -1.597555 | -0.802443 | 1.940886  |
| O  | -0.710310 | 0.037655  | 1.791757  |
| O  | -1.402519 | -2.093263 | 1.679980  |
| C  | -3.007105 | -0.471468 | 2.409229  |
| C  | -3.287771 | -1.243462 | 3.717652  |
| H  | -4.304231 | -1.021338 | 4.056167  |
| H  | -3.200497 | -2.322253 | 3.566403  |
| H  | -2.592313 | -0.945455 | 4.508865  |
| C  | -3.124036 | 1.042748  | 2.636334  |
| H  | -2.928718 | 1.595538  | 1.713100  |

|   |           |           |           |
|---|-----------|-----------|-----------|
| H | -4.135977 | 1.282450  | 2.975753  |
| H | -2.413563 | 1.385766  | 3.393184  |
| C | -3.993966 | -0.922596 | 1.306234  |
| H | -5.015170 | -0.691349 | 1.624090  |
| H | -3.801468 | -0.399156 | 0.364694  |
| H | -3.921181 | -1.997646 | 1.125353  |
| C | 2.892525  | 1.122229  | -0.008827 |
| O | 2.529148  | 0.725075  | -1.144804 |
| O | 2.093913  | 0.967139  | 0.994618  |
| C | 4.249702  | 1.777054  | 0.246584  |
| C | 5.029456  | 0.863063  | 1.217709  |
| H | 6.011202  | 1.298636  | 1.430672  |
| H | 4.488538  | 0.745390  | 2.160431  |
| H | 5.184901  | -0.130392 | 0.783177  |
| C | 5.022774  | 1.940038  | -1.069309 |
| H | 4.474974  | 2.575073  | -1.771526 |
| H | 5.995959  | 2.401645  | -0.872984 |
| H | 5.189448  | 0.972522  | -1.550622 |
| C | 4.008656  | 3.152335  | 0.903617  |
| H | 4.967253  | 3.634565  | 1.121618  |
| H | 3.441723  | 3.812080  | 0.237339  |
| H | 3.452117  | 3.044632  | 1.838145  |

**21n**

Energy = -3357.04215266 ZPE = -3355.973102 H =  
-3355.899557 G = -3356.086562

|    |           |           |           |
|----|-----------|-----------|-----------|
| C  | -1.992124 | 1.880143  | 2.074035  |
| C  | -2.203434 | 2.550899  | 3.308197  |
| C  | -1.802296 | 3.880496  | 3.469655  |
| C  | -1.211890 | 4.593944  | 2.433786  |
| C  | -0.983995 | 3.978255  | 1.169003  |
| C  | -1.329188 | 2.614569  | 1.001121  |
| N  | -1.119516 | 1.954705  | -0.160896 |
| C  | -0.603951 | 2.614026  | -1.194496 |
| C  | -0.264517 | 3.975906  | -1.134005 |
| C  | -0.442881 | 4.658406  | 0.053902  |
| N  | -2.388325 | 0.654825  | 1.722372  |
| H  | -1.964773 | 4.366141  | 4.426441  |
| H  | -0.916991 | 5.628986  | 2.573335  |
| H  | -0.165054 | 5.702915  | 0.146555  |
| H  | 0.159950  | 4.460609  | -2.004887 |
| H  | -0.451274 | 2.036900  | -2.097057 |
| C  | -3.097939 | -0.258701 | 2.533471  |
| C  | -3.812272 | -1.263140 | 1.704587  |
| C  | -4.740612 | -2.169133 | 2.287363  |
| C  | -3.522912 | -1.257937 | 0.314151  |
| C  | -5.395955 | -3.057648 | 1.429023  |
| C  | -4.232929 | -2.154028 | -0.496289 |
| C  | -5.153950 | -3.050233 | 0.051127  |
| H  | -6.113432 | -3.760731 | 1.844813  |
| H  | -4.051040 | -2.173630 | -1.569026 |
| H  | -5.682939 | -3.754849 | -0.587683 |
| O  | -3.091514 | -0.205711 | 3.764416  |
| H  | -2.670287 | 2.007480  | 4.117264  |
| C  | -5.050464 | -2.213356 | 3.764968  |
| H  | -5.373335 | -1.237035 | 4.138349  |
| H  | -5.835568 | -2.947182 | 3.970042  |
| H  | -4.161832 | -2.474933 | 4.346979  |
| Co | -1.883054 | -0.081789 | -0.180318 |
| C  | 0.310096  | -2.186790 | 0.531648  |
| O  | -0.466430 | -1.283107 | 0.921572  |
| O  | 1.487372  | -1.903745 | 0.099950  |
| C  | -0.149026 | -3.650975 | 0.504130  |
| C  | -0.906938 | -3.827955 | -0.832246 |



|    |           |           |           |    |           |           |           |
|----|-----------|-----------|-----------|----|-----------|-----------|-----------|
| H  | 0.099874  | 6.004994  | 3.408549  | H  | 0.315318  | 2.055811  | 5.827330  |
| H  | 0.560294  | 4.391283  | 3.999683  | H  | 0.600528  | 0.306445  | 5.648363  |
| Co | 1.266294  | 1.166107  | -0.355907 | H  | 1.589850  | 1.447637  | 4.751937  |
| C  | -4.290167 | 1.807501  | -1.263615 | Co | -1.092963 | -1.164830 | 0.646155  |
| O  | -3.311417 | 1.958022  | -1.977431 | C  | -0.846076 | 0.119827  | -2.143800 |
| O  | -4.619148 | 0.650924  | -0.679623 | O  | -1.500135 | -0.357004 | -1.194403 |
| C  | -5.260409 | 2.939972  | -0.904730 | O  | 0.270173  | 0.757300  | -1.986262 |
| C  | -6.718591 | 2.454368  | -1.021788 | C  | -1.282900 | -0.091579 | -3.604794 |
| H  | -7.399765 | 3.276329  | -0.778117 | C  | -1.210791 | 1.245486  | -4.371931 |
| H  | -6.942368 | 2.119993  | -2.040437 | H  | -1.518116 | 1.081063  | -5.409838 |
| H  | -6.916137 | 1.625677  | -0.338539 | H  | -1.882443 | 1.979822  | -3.923144 |
| C  | -4.963256 | 3.361165  | 0.553034  | H  | -0.198204 | 1.656669  | -4.384988 |
| H  | -3.928416 | 3.700868  | 0.659685  | C  | -0.283741 | -1.101015 | -4.226775 |
| H  | -5.624690 | 4.185111  | 0.840030  | H  | -0.285513 | -2.053515 | -3.687867 |
| H  | -5.129646 | 2.530157  | 1.244213  | H  | -0.576181 | -1.303799 | -5.261461 |
| C  | -5.019098 | 4.125243  | -1.851217 | H  | 0.738300  | -0.713903 | -4.242762 |
| H  | -5.677431 | 4.956605  | -1.580769 | C  | -2.705051 | -0.664398 | -3.691755 |
| H  | -3.983250 | 4.467452  | -1.796830 | H  | -2.926680 | -0.917029 | -4.733763 |
| H  | -5.223371 | 3.847104  | -2.889780 | H  | -2.826597 | -1.558155 | -3.079566 |
| O  | 2.829040  | 2.141012  | -1.574086 | H  | -3.432739 | 0.069358  | -3.347442 |
| C  | 3.192349  | 1.747915  | -2.689059 | O  | -2.866404 | -1.806877 | 1.053537  |
| O  | 2.370003  | 1.129760  | -3.521256 | C  | -3.641611 | -2.432607 | 0.219853  |
| C  | 4.632299  | 1.850612  | -3.167002 | O  | -4.000564 | -1.965780 | -0.874048 |
| C  | 5.240131  | 0.441107  | -2.942665 | C  | -4.170349 | -3.795523 | 0.714484  |
| H  | 6.289494  | 0.449696  | -3.252230 | C  | -4.794212 | -4.579333 | -0.448670 |
| H  | 5.196897  | 0.157003  | -1.886473 | H  | -5.198025 | -5.530854 | -0.086260 |
| H  | 4.711583  | -0.315865 | -3.528147 | H  | -5.602127 | -4.012426 | -0.917247 |
| C  | 4.686475  | 2.218965  | -4.661190 | H  | -4.046651 | -4.797108 | -1.218683 |
| H  | 4.161870  | 1.481384  | -5.272537 | C  | -3.029491 | -4.611387 | 1.353026  |
| H  | 4.236435  | 3.200444  | -4.841490 | H  | -2.265895 | -4.870786 | 0.613479  |
| H  | 5.730340  | 2.258973  | -4.986611 | H  | -2.547607 | -4.046527 | 2.154132  |
| C  | 5.387518  | 2.886122  | -2.320291 | H  | -3.425966 | -5.543996 | 1.768986  |
| H  | 4.952039  | 3.883341  | -2.435478 | C  | -5.242919 | -3.485278 | 1.783714  |
| H  | 5.360117  | 2.623123  | -1.260099 | H  | -4.808095 | -2.922990 | 2.615322  |
| H  | 6.432084  | 2.927901  | -2.642434 | H  | -6.062334 | -2.895582 | 1.358355  |
| C  | 1.022690  | -2.833407 | 1.472022  | H  | -5.662704 | -4.417938 | 2.176373  |
| C  | 2.078174  | -3.432196 | 2.155112  | H  | -4.028361 | -0.116395 | -0.903931 |
| C  | 2.618279  | -4.659842 | 1.703527  | H  | 1.481598  | 1.021006  | -3.072815 |
| C  | 2.138231  | -5.311051 | 0.587168  |    |           |           |           |
| C  | 1.066242  | -4.735104 | -0.142135 |    |           |           |           |
| C  | 0.521517  | -3.498752 | 0.305732  |    |           |           |           |
| N  | -0.502367 | -2.883590 | -0.354931 |    |           |           |           |
| C  | -1.016949 | -3.441194 | -1.440991 |    |           |           |           |
| C  | -0.539443 | -4.663909 | -1.956062 |    |           |           |           |
| C  | 0.497642  | -5.304330 | -1.309255 |    |           |           |           |
| N  | 0.368464  | -1.640248 | 1.767613  |    |           |           |           |
| H  | 3.444095  | -5.090991 | 2.261836  |    |           |           |           |
| H  | 2.566366  | -6.251144 | 0.254089  |    |           |           |           |
| H  | 0.887885  | -6.246162 | -1.684299 |    |           |           |           |
| H  | -0.994017 | -5.080410 | -2.847681 |    |           |           |           |
| H  | -1.841058 | -2.908690 | -1.898550 |    |           |           |           |
| C  | 0.619267  | -0.851550 | 2.883584  |    |           |           |           |
| C  | -0.356507 | 0.271744  | 2.947503  |    |           |           |           |
| C  | -0.402445 | 1.239576  | 3.974198  |    |           |           |           |
| C  | -1.282718 | 0.304665  | 1.900513  |    |           |           |           |
| C  | -1.410267 | 2.210526  | 3.889956  |    |           |           |           |
| C  | -2.276163 | 1.267735  | 1.826155  |    |           |           |           |
| C  | -2.329591 | 2.232120  | 2.838774  |    |           |           |           |
| H  | -1.472615 | 2.968653  | 4.665951  |    |           |           |           |
| H  | -2.993831 | 1.261919  | 1.017902  |    |           |           |           |
| H  | -3.092682 | 3.003939  | 2.808959  |    |           |           |           |
| O  | 1.506975  | -1.069793 | 3.709955  |    |           |           |           |
| H  | 2.486670  | -2.943506 | 3.026113  |    |           |           |           |
| C  | 0.577655  | 1.263070  | 5.120788  |    |           |           |           |

  

|                                                |           |           |           |  |  |  |  |
|------------------------------------------------|-----------|-----------|-----------|--|--|--|--|
| <b>21s</b>                                     |           |           |           |  |  |  |  |
| Energy = -3357.05633278 ZPE = -3355.979789 H = |           |           |           |  |  |  |  |
| -3355.909122 G = -3356.085633                  |           |           |           |  |  |  |  |
| C                                              | -2.184212 | 1.146290  | -2.637004 |  |  |  |  |
| C                                              | -2.373669 | 2.093768  | -3.641850 |  |  |  |  |
| C                                              | -1.350669 | 2.351036  | -4.588243 |  |  |  |  |
| C                                              | -0.153205 | 1.666508  | -4.601162 |  |  |  |  |
| C                                              | 0.082606  | 0.674388  | -3.613875 |  |  |  |  |
| C                                              | -0.913892 | 0.464607  | -2.605477 |  |  |  |  |
| N                                              | -0.731116 | -0.413969 | -1.594631 |  |  |  |  |
| C                                              | 0.318008  | -1.233277 | -1.608793 |  |  |  |  |
| C                                              | 1.325922  | -1.140301 | -2.592480 |  |  |  |  |
| C                                              | 1.223968  | -0.151677 | -3.564170 |  |  |  |  |
| N                                              | -3.066766 | 0.732194  | -1.661029 |  |  |  |  |
| H                                              | -1.537605 | 3.107590  | -5.345292 |  |  |  |  |
| H                                              | 0.600961  | 1.859144  | -5.357149 |  |  |  |  |
| H                                              | 2.006434  | -0.031097 | -4.306983 |  |  |  |  |
| H                                              | 2.148160  | -1.844087 | -2.589244 |  |  |  |  |
| H                                              | 0.324249  | -2.007764 | -0.854011 |  |  |  |  |
| C                                              | -4.323771 | 1.235275  | -1.439320 |  |  |  |  |
| C                                              | -4.876466 | 0.707496  | -0.154931 |  |  |  |  |
| C                                              | -6.187397 | 0.962866  | 0.304541  |  |  |  |  |
| C                                              | -3.976316 | -0.049200 | 0.615175  |  |  |  |  |
| C                                              | -6.553924 | 0.427158  | 1.548476  |  |  |  |  |
| C                                              | -4.360774 | -0.568814 | 1.845868  |  |  |  |  |



|    |           |           |           |    |           |           |           |
|----|-----------|-----------|-----------|----|-----------|-----------|-----------|
| H  | -4.162972 | 1.525512  | -2.938790 | H  | -3.944298 | 4.966862  | -1.993938 |
| H  | -1.982417 | 0.340592  | -2.600229 | H  | -1.923974 | 4.435537  | -3.370664 |
| C  | -1.132251 | -2.492353 | 2.361061  | H  | -0.108834 | 3.027835  | -2.346709 |
| C  | 0.114835  | -3.092282 | 1.816451  | C  | -0.866004 | 1.144212  | 3.078661  |
| C  | 0.968127  | -3.962641 | 2.524177  | C  | 0.397584  | 0.340271  | 3.070879  |
| C  | 0.414086  | -2.712919 | 0.502165  | C  | 0.920180  | -0.351324 | 4.187297  |
| C  | 2.095274  | -4.443300 | 1.842691  | C  | 1.077278  | 0.283584  | 1.860298  |
| C  | 1.535701  | -3.190824 | -0.165199 | C  | 2.140407  | -1.024055 | 4.009425  |
| C  | 2.373968  | -4.075369 | 0.522519  | C  | 2.245533  | -0.428734 | 1.660886  |
| H  | 2.772268  | -5.118089 | 2.359805  | C  | 2.801239  | -1.063162 | 2.779933  |
| H  | 1.769452  | -2.866210 | -1.172220 | H  | 2.569391  | -1.553847 | 4.855958  |
| H  | 3.256786  | -4.475352 | 0.031216  | H  | 2.689455  | -0.506912 | 0.678504  |
| O  | -1.600050 | -2.689731 | 3.483217  | H  | 3.731800  | -1.613787 | 2.684189  |
| H  | -3.569275 | -1.605612 | 3.466082  | O  | -1.667656 | 1.137595  | 4.021057  |
| C  | 0.714801  | -4.356476 | 3.956847  | H  | -3.296086 | 2.442666  | 3.364415  |
| H  | -0.257839 | -4.842110 | 4.072915  | C  | 0.206255  | -0.427460 | 5.513423  |
| H  | 1.495594  | -5.033018 | 4.315001  | H  | 0.837125  | -0.917784 | 6.260834  |
| H  | 0.692352  | -3.470055 | 4.597358  | H  | -0.084844 | 0.560030  | 5.878162  |
| Co | -0.853258 | -1.491377 | -0.253702 | H  | -0.716796 | -1.004264 | 5.399604  |
| C  | 4.899367  | -0.743913 | -0.628259 | Co | 0.462059  | 1.813709  | 0.460967  |
| O  | 3.904676  | -0.856868 | -1.332382 | C  | 0.906421  | 0.016425  | -2.094197 |
| O  | 5.118875  | 0.310454  | 0.157294  | O  | 1.132153  | 0.891674  | -1.234975 |
| C  | 5.994642  | -1.808794 | -0.518404 | O  | 0.166339  | -1.022966 | -1.877198 |
| C  | 7.376234  | -1.155624 | -0.727087 | C  | 1.468780  | 0.174934  | -3.514352 |
| H  | 8.159300  | -1.916925 | -0.648265 | C  | 2.077897  | -1.159098 | -3.993519 |
| H  | 7.449434  | -0.696222 | -1.718665 | H  | 2.471279  | -1.031041 | -5.007204 |
| H  | 7.564715  | -0.384119 | 0.022861  | H  | 2.893288  | -1.466542 | -3.336439 |
| C  | 5.913718  | -2.421145 | 0.898966  | H  | 1.331090  | -1.957064 | -4.024176 |
| H  | 4.939264  | -2.890445 | 1.067750  | C  | 0.288384  | 0.567702  | -4.436669 |
| H  | 6.684985  | -3.189840 | 1.013604  | H  | -0.195161 | 1.491406  | -4.102854 |
| H  | 6.070096  | -1.657387 | 1.665473  | H  | 0.664440  | 0.737347  | -5.450175 |
| C  | 5.754550  | -2.895315 | -1.575899 | H  | -0.468954 | -0.219301 | -4.490555 |
| H  | 6.513485  | -3.678483 | -1.483200 | C  | 2.534535  | 1.282010  | -3.527623 |
| H  | 4.767813  | -3.349119 | -1.456421 | H  | 2.951365  | 1.376232  | -4.535473 |
| H  | 5.809401  | -2.479588 | -2.586447 | H  | 2.107721  | 2.246781  | -3.240271 |
| O  | -1.922306 | -3.030422 | -1.386324 | H  | 3.335345  | 1.048102  | -2.824743 |
| C  | -2.142068 | -3.042035 | -2.603729 | O  | 1.726587  | 3.248870  | 0.579590  |
| O  | -1.371530 | -2.403809 | -3.468301 | C  | 2.876967  | 3.404773  | -0.006433 |
| C  | -3.355674 | -3.725445 | -3.215187 | O  | 3.712964  | 2.511270  | -0.191982 |
| C  | -4.324365 | -2.585472 | -3.622176 | C  | 3.154550  | 4.847395  | -0.478536 |
| H  | -5.231349 | -3.020489 | -4.052496 | C  | 4.538756  | 4.935536  | -1.134596 |
| H  | -4.612092 | -1.982753 | -2.754612 | H  | 4.731050  | 5.960891  | -1.468527 |
| H  | -3.867561 | -1.926806 | -4.365582 | H  | 5.325564  | 4.646441  | -0.432195 |
| C  | -2.939209 | -4.534461 | -4.459278 | H  | 4.604831  | 4.270683  | -2.000524 |
| H  | -2.467572 | -3.895665 | -5.209366 | C  | 2.060315  | 5.234863  | -1.495978 |
| H  | -2.238108 | -5.332053 | -4.193103 | H  | 2.080904  | 4.571476  | -2.368162 |
| H  | -3.826118 | -4.995533 | -4.904300 | H  | 1.068009  | 5.173743  | -1.042718 |
| C  | -4.020822 | -4.634284 | -2.171680 | H  | 2.221360  | 6.259129  | -1.849288 |
| H  | -3.338633 | -5.424581 | -1.844603 | C  | 3.079538  | 5.786668  | 0.742977  |
| H  | -4.327523 | -4.064569 | -1.290770 | H  | 2.098062  | 5.724189  | 1.219870  |
| H  | -4.907198 | -5.103199 | -2.608816 | H  | 3.841335  | 5.527083  | 1.486433  |
| C  | -2.142314 | 2.574656  | 1.572438  | H  | 3.251552  | 6.822262  | 0.430201  |
| C  | -3.264885 | 2.835918  | 2.360269  | H  | 4.417522  | 1.008093  | 0.032710  |
| C  | -4.346612 | 3.594195  | 1.857734  | H  | -0.661019 | -1.906291 | -2.965180 |
| C  | -4.349473 | 4.119152  | 0.583169  |    |           |           |           |
| C  | -3.233903 | 3.882768  | -0.260769 |    |           |           |           |
| C  | -2.147171 | 3.102878  | 0.232502  |    |           |           |           |
| N  | -1.071329 | 2.817791  | -0.551778 |    |           |           |           |
| C  | -1.003068 | 3.285418  | -1.790327 |    |           |           |           |
| C  | -2.023380 | 4.075164  | -2.353175 |    |           |           |           |
| C  | -3.133912 | 4.368311  | -1.587635 |    |           |           |           |
| N  | -1.000614 | 1.866451  | 1.911181  |    |           |           |           |
| H  | -5.198954 | 3.764313  | 2.509228  |    |           |           |           |
| H  | -5.183507 | 4.707626  | 0.214159  |    |           |           |           |

  

|                                                |          |           |           |
|------------------------------------------------|----------|-----------|-----------|
| <b>21t</b>                                     |          |           |           |
| Energy = -3357.07732638 ZPE = -3356.002148 H = |          |           |           |
| -3355.930821 G = -3356.110764                  |          |           |           |
| C                                              | 3.129513 | -0.479691 | -2.773285 |
| C                                              | 3.695946 | -1.115519 | -3.880815 |
| C                                              | 3.052648 | -1.074788 | -5.138389 |
| C                                              | 1.866060 | -0.399545 | -5.339189 |
| C                                              | 1.260542 | 0.271943  | -4.246280 |
| C                                              | 1.882194 | 0.205469  | -2.965110 |



|    |           |           |           |    |           |           |           |
|----|-----------|-----------|-----------|----|-----------|-----------|-----------|
| N  | 1.334668  | 0.809205  | -1.867292 | C  | -4.439756 | 2.717623  | -0.304195 |
| C  | 0.246697  | 1.548869  | -2.008205 | N  | -3.105785 | 2.560351  | -0.055937 |
| C  | -0.425588 | 1.687884  | -3.240653 | C  | -2.355572 | 3.622572  | 0.205443  |
| C  | 0.067124  | 1.032413  | -4.347786 | C  | -2.889019 | 4.924675  | 0.260686  |
| N  | 3.627065  | -0.410836 | -1.487323 | C  | -4.241354 | 5.103954  | 0.048069  |
| H  | 3.523752  | -1.588167 | -5.972230 | N  | -4.383281 | 0.385828  | -0.727721 |
| H  | 1.394010  | -0.363139 | -6.316110 | H  | -8.227086 | 2.982006  | -1.002100 |
| H  | -0.437732 | 1.101025  | -5.307370 | H  | -6.958565 | 5.039621  | -0.450444 |
| H  | -1.324194 | 2.293201  | -3.289981 | H  | -4.682407 | 6.095342  | 0.096688  |
| H  | -0.131499 | 2.016454  | -1.111625 | H  | -2.235037 | 5.760995  | 0.478726  |
| C  | 4.758988  | -1.029654 | -1.029551 | H  | -1.304081 | 3.435072  | 0.391601  |
| C  | 4.847143  | -0.931886 | 0.457173  | C  | -4.769701 | -0.791490 | -1.350698 |
| C  | 5.920024  | -1.447531 | 1.218343  | C  | -3.563322 | -1.625899 | -1.579406 |
| C  | 3.741131  | -0.326351 | 1.077172  | C  | -3.523847 | -2.850742 | -2.276181 |
| C  | 5.837321  | -1.332831 | 2.613805  | C  | -2.383100 | -1.039355 | -1.126224 |
| C  | 3.677102  | -0.238927 | 2.464536  | C  | -2.256400 | -3.400432 | -2.522056 |
| C  | 4.733522  | -0.742771 | 3.231529  | C  | -1.130117 | -1.558192 | -1.390539 |
| H  | 6.650075  | -1.720126 | 3.223199  | C  | -1.084012 | -2.761634 | -2.109140 |
| H  | 2.814847  | 0.200270  | 2.950260  | H  | -2.187554 | -4.340146 | -3.063229 |
| H  | 4.693233  | -0.680772 | 4.316549  | H  | -0.226827 | -1.075024 | -1.052641 |
| O  | 5.592018  | -1.608082 | -1.747092 | H  | -0.118513 | -3.204105 | -2.336820 |
| H  | 4.636252  | -1.632553 | -3.760898 | O  | -5.919086 | -1.065641 | -1.697481 |
| C  | 7.125181  | -2.111942 | 0.595596  | H  | -7.105491 | 0.782077  | -1.152697 |
| H  | 7.617116  | -1.451652 | -0.123769 | C  | -4.775034 | -3.539219 | -2.760695 |
| H  | 7.846918  | -2.397971 | 1.366491  | H  | -4.527702 | -4.470633 | -3.276578 |
| H  | 6.836424  | -3.003342 | 0.031786  | H  | -5.447306 | -3.767464 | -1.927860 |
| Co | 2.427516  | 0.273717  | -0.189267 | H  | -5.341800 | -2.895113 | -3.438614 |
| C  | 1.152113  | -2.236030 | 0.697455  | Co | -2.621825 | 0.524000  | -0.000566 |
| O  | 1.758450  | -1.521758 | -0.173083 | C  | 0.027537  | 1.041889  | 1.552111  |
| O  | 0.280577  | -1.810967 | 1.490291  | O  | -0.832165 | 0.801268  | 0.664720  |
| C  | 1.604564  | -3.711553 | 0.758107  | O  | 1.276798  | 1.060770  | 1.277239  |
| C  | 0.386546  | -4.641642 | 0.890732  | C  | -0.365261 | 1.339298  | 3.018207  |
| H  | 0.718779  | -5.684367 | 0.933854  | C  | -0.264956 | 0.011835  | 3.806705  |
| H  | -0.182395 | -4.427713 | 1.797141  | H  | -0.441388 | 0.219084  | 4.867563  |
| H  | -0.288470 | -4.534730 | 0.034939  | H  | -1.009874 | -0.705408 | 3.462743  |
| C  | 2.440418  | -4.098272 | -0.472139 | H  | 0.718366  | -0.448127 | 3.694212  |
| H  | 3.323470  | -3.462661 | -0.563905 | C  | 0.608278  | 2.364870  | 3.633677  |
| H  | 2.764761  | -5.141147 | -0.385473 | H  | 0.643502  | 3.290149  | 3.049276  |
| H  | 1.861178  | -3.998718 | -1.395297 | H  | 0.270527  | 2.618966  | 4.642745  |
| C  | 2.485033  | -3.812379 | 2.027365  | H  | 1.622485  | 1.969248  | 3.718205  |
| H  | 2.839174  | -4.841551 | 2.152620  | C  | -1.797455 | 1.885631  | 3.136456  |
| H  | 3.354849  | -3.152002 | 1.953717  | H  | -2.040983 | 2.011983  | 4.196183  |
| H  | 1.913374  | -3.530932 | 2.916753  | H  | -1.900174 | 2.861672  | 2.656745  |
| O  | 3.393621  | 1.997790  | -0.362057 | H  | -2.528161 | 1.200098  | 2.708421  |
| C  | 3.711432  | 2.794502  | 0.537438  | O  | -3.089200 | -0.823478 | 1.702847  |
| O  | 3.081519  | 2.866396  | 1.685061  | C  | -3.079468 | -2.020407 | 2.023440  |
| C  | 4.936589  | 3.680533  | 0.395922  | O  | -2.013052 | -2.776016 | 1.990394  |
| C  | 4.710575  | 5.047721  | 1.064705  | C  | -4.353736 | -2.698695 | 2.528865  |
| H  | 5.621794  | 5.647247  | 0.980210  | C  | -4.140537 | -4.195356 | 2.796696  |
| H  | 3.897116  | 5.594710  | 0.577113  | H  | -5.074539 | -4.638831 | 3.155866  |
| H  | 4.466106  | 4.938392  | 2.123631  | H  | -3.838550 | -4.720136 | 1.885893  |
| C  | 6.066070  | 2.904185  | 1.125969  | H  | -3.367783 | -4.358629 | 3.552373  |
| H  | 5.833547  | 2.777025  | 2.186922  | C  | -4.758146 | -1.971184 | 3.831560  |
| H  | 6.210421  | 1.913912  | 0.682448  | H  | -3.991669 | -2.089946 | 4.604797  |
| H  | 7.000968  | 3.465930  | 1.038645  | H  | -4.904230 | -0.903196 | 3.648967  |
| C  | 5.292792  | 3.849073  | -1.089285 | H  | -5.693960 | -2.392301 | 4.212048  |
| H  | 5.465516  | 2.880809  | -1.564431 | C  | -5.447662 | -2.495214 | 1.460080  |
| H  | 4.489957  | 4.357833  | -1.632035 | H  | -5.601054 | -1.433471 | 1.256472  |
| H  | 6.202109  | 4.450559  | -1.178489 | H  | -5.177038 | -2.986132 | 0.520371  |
| C  | -5.167108 | 1.535413  | -0.649641 | H  | -6.390096 | -2.926479 | 1.811215  |
| C  | -6.532267 | 1.659496  | -0.892645 | H  | -1.138927 | -2.309498 | 1.726859  |
| C  | -7.159901 | 2.926268  | -0.808719 | H  | 2.332762  | 2.194875  | 1.683630  |
| C  | -6.463313 | 4.075242  | -0.500033 |    |           |           |           |
| C  | -5.069196 | 3.991973  | -0.246744 |    |           |           |           |

22n

Energy = -3357.11078072 ZPE = -3356.037496 H =  
-3355.966768 G = -3356.141539

|    |           |           |           |    |           |           |           |
|----|-----------|-----------|-----------|----|-----------|-----------|-----------|
| C  | -2.352992 | -1.727396 | -1.417449 | H  | -1.725930 | -5.295713 | 2.602333  |
| C  | -2.807798 | -2.718898 | -2.352881 | H  | -0.984257 | -3.485349 | 4.181982  |
| C  | -3.632103 | -3.750209 | -1.944942 | H  | 0.339466  | -1.570732 | 3.273919  |
| C  | -4.033499 | -3.875867 | -0.607110 | C  | 1.767420  | -1.808207 | -2.407242 |
| C  | -3.670012 | -2.895711 | 0.350710  | C  | 2.623795  | -0.569617 | -2.461706 |
| C  | -2.847366 | -1.804786 | -0.067004 | C  | 3.921755  | -0.789568 | -1.930507 |
| N  | -2.486603 | -0.816555 | 0.794766  | C  | 2.258542  | 0.671778  | -3.033751 |
| C  | -2.914085 | -0.873061 | 2.085402  | C  | 4.848833  | 0.251434  | -1.903850 |
| C  | -3.693438 | -1.906103 | 2.570169  | C  | 3.236091  | 1.694129  | -2.949019 |
| C  | -4.067383 | -2.947360 | 1.707208  | C  | 4.496597  | 1.499868  | -2.403353 |
| N  | -1.551131 | -0.646855 | -1.701119 | H  | 5.839851  | 0.081066  | -1.493128 |
| H  | -3.953189 | -4.491356 | -2.670261 | H  | 2.993960  | 2.688993  | -3.294510 |
| H  | -4.657227 | -4.708191 | -0.294563 | H  | 5.198629  | 2.327765  | -2.365545 |
| H  | -4.677972 | -3.774251 | 2.055316  | O  | 1.836108  | -2.620842 | -3.334028 |
| H  | -3.995102 | -1.906539 | 3.612156  | H  | 0.280556  | -4.006349 | -2.854562 |
| H  | -2.609995 | -0.047218 | 2.709778  | C  | 4.331930  | -2.159779 | -1.432518 |
| C  | -0.853294 | -0.580719 | -2.889607 | H  | 5.355646  | -2.140398 | -1.050612 |
| C  | -0.377124 | 0.760253  | -3.411430 | H  | 3.679430  | -2.504973 | -0.627092 |
| C  | -1.446471 | 1.532238  | -3.932941 | H  | 4.279674  | -2.896649 | -2.239961 |
| C  | 0.973299  | 1.094987  | -3.722401 | Co | 1.351891  | -0.663084 | 0.429632  |
| C  | -1.187751 | 2.568784  | -4.834536 | C  | 0.114109  | 1.118005  | 2.691317  |
| C  | 1.156999  | 2.076005  | -4.724150 | O  | 1.061886  | 0.380988  | 2.338919  |
| C  | 0.109441  | 2.801640  | -5.275625 | O  | -0.844044 | 1.461740  | 1.905430  |
| H  | -2.015382 | 3.151017  | -5.230428 | C  | 0.054523  | 1.605034  | 4.155262  |
| H  | 2.158715  | 2.276686  | -5.083910 | C  | -0.048003 | 3.141967  | 4.203026  |
| H  | 0.310400  | 3.548052  | -6.038398 | H  | -0.188244 | 3.468009  | 5.238791  |
| O  | -0.730401 | -1.511107 | -3.694491 | H  | 0.867250  | 3.610142  | 3.828696  |
| H  | -2.482925 | -2.651172 | -3.377885 | H  | -0.890761 | 3.512048  | 3.613829  |
| C  | -2.892115 | 1.235506  | -3.577644 | C  | -1.205464 | 0.990649  | 4.806865  |
| H  | -3.088748 | 1.380131  | -2.511457 | H  | -1.216982 | -0.100147 | 4.709973  |
| H  | -3.560646 | 1.893728  | -4.138767 | H  | -1.223131 | 1.235122  | 5.873644  |
| H  | -3.166749 | 0.202201  | -3.815988 | H  | -2.120284 | 1.387579  | 4.358001  |
| Co | -1.385516 | 0.678466  | -0.098707 | C  | 1.310156  | 1.148289  | 4.913663  |
| C  | 1.021356  | 2.318725  | -0.426261 | H  | 1.275109  | 1.515380  | 5.944623  |
| O  | -0.161406 | 2.101487  | -0.799391 | H  | 1.386057  | 0.057716  | 4.939043  |
| O  | 1.816373  | 1.387564  | -0.058876 | H  | 2.215561  | 1.533893  | 4.437610  |
| C  | 1.451940  | 3.793768  | -0.371681 | C  | -5.136074 | 2.817329  | 0.888743  |
| C  | 2.945281  | 3.965626  | -0.066995 | C  | -5.884858 | 1.477320  | 1.112968  |
| H  | 3.204106  | 5.028986  | -0.091903 | H  | -5.638921 | 1.045844  | 2.088364  |
| H  | 3.195495  | 3.587512  | 0.927959  | H  | -6.964121 | 1.653684  | 1.074760  |
| H  | 3.565377  | 3.442164  | -0.796746 | H  | -5.621742 | 0.750718  | 0.338581  |
| C  | 1.081763  | 4.474225  | -1.705092 | C  | -5.461216 | 3.370436  | -0.510400 |
| H  | 0.015089  | 4.362042  | -1.910435 | H  | -6.535048 | 3.565874  | -0.586251 |
| H  | 1.320352  | 5.541369  | -1.650496 | H  | -4.929924 | 4.310065  | -0.694608 |
| H  | 1.629605  | 4.044227  | -2.545819 | H  | -5.179339 | 2.659036  | -1.289847 |
| C  | 0.617151  | 4.433513  | 0.762472  | C  | -5.524789 | 3.830395  | 1.976813  |
| H  | 0.843612  | 5.502641  | 0.830304  | H  | -5.330633 | 3.435961  | 2.976796  |
| H  | -0.452570 | 4.307035  | 0.577650  | H  | -4.966872 | 4.765109  | 1.863438  |
| H  | 0.852111  | 3.973359  | 1.723818  | H  | -6.592062 | 4.058218  | 1.896386  |
| C  | 0.380397  | -3.094497 | -0.914544 | C  | -3.658758 | 2.454481  | 0.958391  |
| C  | -0.004891 | -4.108607 | -1.821139 | O  | -3.080013 | 1.958176  | -0.021535 |
| C  | -0.733495 | -5.220930 | -1.388376 | O  | -3.077470 | 2.626018  | 2.123424  |
| C  | -1.133202 | -5.360621 | -0.067110 | H  | -2.130085 | 2.236207  | 2.110748  |
| C  | -0.779095 | -4.373637 | 0.886080  | C  | 5.269739  | -0.460044 | 2.485008  |
| C  | -0.028752 | -3.236376 | 0.459399  | C  | 5.313097  | -1.977942 | 2.709914  |
| N  | 0.331044  | -2.254745 | 1.334364  | H  | 5.386035  | -2.514909 | 1.760182  |
| C  | -0.001825 | -2.371575 | 2.632315  | H  | 6.184154  | -2.232378 | 3.321039  |
| C  | -0.733394 | -3.449626 | 3.127580  | H  | 4.414061  | -2.325871 | 3.226226  |
| C  | -1.144936 | -4.448127 | 2.252719  | C  | 5.128982  | 0.278713  | 3.836073  |
| N  | 1.115102  | -1.959207 | -1.206009 | H  | 5.984652  | 0.035519  | 4.473458  |
| H  | -1.012523 | -5.976954 | -2.116201 | H  | 5.099297  | 1.361610  | 3.691955  |
| H  | -1.704395 | -6.225261 | 0.256606  | H  | 4.216305  | -0.026884 | 4.357742  |
|    |           |           |           | C  | 6.547550  | 0.012207  | 1.757312  |
|    |           |           |           | H  | 6.667471  | -0.502865 | 0.798730  |

|                         |                    |           |           |    |           |           |           |
|-------------------------|--------------------|-----------|-----------|----|-----------|-----------|-----------|
| H                       | 6.521471           | 1.088286  | 1.570404  | C  | 0.183685  | -3.021936 | -1.202957 |
| H                       | 7.421976           | -0.214117 | 2.375028  | N  | 0.671909  | -2.761387 | 0.044095  |
| C                       | 4.061233           | -0.097006 | 1.631292  | C  | 0.703632  | -3.717925 | 0.964676  |
| O                       | 3.253299           | -0.954723 | 1.241160  | C  | 0.208093  | -5.011068 | 0.713169  |
| O                       | 3.953251           | 1.179450  | 1.352308  | C  | -0.322266 | -5.297230 | -0.527554 |
| H                       | 3.135816           | 1.363274  | 0.780544  | N  | 0.854097  | -0.783283 | -1.646312 |
|                         |                    |           |           | H  | -1.222066 | -3.604217 | -4.738248 |
|                         |                    |           |           | H  | -1.271389 | -5.477613 | -3.105382 |
| <b>22q</b>              |                    |           |           | H  | -0.723217 | -6.282787 | -0.746390 |
| Energy = -3357.17350583 | ZPE = -3356.095024 | H =       |           | H  | 0.247085  | -5.756020 | 1.499710  |
| -3356.02493             | G = -3356.197746   |           |           | H  | 1.121766  | -3.441244 | 1.923045  |
| C                       | -2.499558          | 0.234205  | -2.359351 | C  | 1.037156  | 0.282303  | -2.483820 |
| C                       | -2.969294          | 0.297192  | -3.674812 | C  | 2.154448  | 1.275748  | -2.236717 |
| C                       | -3.740658          | -0.742796 | -4.235645 | C  | 3.411873  | 0.738388  | -2.616002 |
| C                       | -4.065899          | -1.875249 | -3.522750 | C  | 1.996778  | 2.677075  | -2.046667 |
| C                       | -3.617312          | -1.993906 | -2.185311 | C  | 4.496253  | 1.587753  | -2.850695 |
| C                       | -2.843690          | -0.941229 | -1.603330 | C  | 3.100901  | 3.487191  | -2.400854 |
| N                       | -2.384070          | -1.036411 | -0.320301 | C  | 4.328631  | 2.966381  | -2.788552 |
| C                       | -2.644011          | -2.126339 | 0.393030  | H  | 5.455029  | 1.163211  | -3.135786 |
| C                       | -3.397448          | -3.204615 | -0.103167 | H  | 2.989626  | 4.564719  | -2.372651 |
| C                       | -3.883943          | -3.133588 | -1.389469 | H  | 5.145505  | 3.635936  | -3.041668 |
| N                       | -1.727279          | 1.188387  | -1.697089 | O  | 0.504084  | 0.411583  | -3.594075 |
| H                       | -4.074381          | -0.638901 | -5.264575 | H  | -0.313266 | -1.404500 | -4.135771 |
| H                       | -4.650268          | -2.677668 | -3.962340 | C  | 3.594571  | -0.747649 | -2.862437 |
| H                       | -4.464103          | -3.948503 | -1.813017 | H  | 4.619440  | -0.957606 | -3.179653 |
| H                       | -3.569442          | -4.070094 | 0.526290  | H  | 3.374490  | -1.342015 | -1.973747 |
| H                       | -2.233502          | -2.153099 | 1.391217  | H  | 2.923286  | -1.099629 | -3.654254 |
| C                       | -1.243546          | 2.283740  | -2.348323 | Co | 1.242172  | -0.930700 | 0.287289  |
| C                       | -0.531832          | 3.269238  | -1.454262 | C  | -0.065726 | -0.985019 | 2.819370  |
| C                       | -1.419556          | 4.153272  | -0.787260 | O  | 1.053332  | -1.154573 | 2.258089  |
| C                       | 0.870483           | 3.437072  | -1.370865 | O  | -1.067186 | -0.453602 | 2.235089  |
| C                       | -0.915538          | 5.181780  | 0.008801  | C  | -0.263354 | -1.485946 | 4.260260  |
| C                       | 1.318050           | 4.489977  | -0.538867 | C  | -0.798119 | -0.333566 | 5.137795  |
| C                       | 0.459407           | 5.344334  | 0.138499  | H  | -0.979991 | -0.701822 | 6.152285  |
| H                       | -1.601547          | 5.853043  | 0.518519  | H  | -0.078928 | 0.488429  | 5.203634  |
| H                       | 2.381198           | 4.632130  | -0.409406 | H  | -1.737451 | 0.068626  | 4.751161  |
| H                       | 0.867806           | 6.131567  | 0.765671  | C  | -1.312433 | -2.622613 | 4.203722  |
| O                       | -1.423642          | 2.614628  | -3.529999 | H  | -0.991369 | -3.427385 | 3.533513  |
| H                       | -2.708115          | 1.157494  | -4.269379 | H  | -1.444788 | -3.048876 | 5.202924  |
| C                       | -2.919432          | 4.006451  | -0.945569 | H  | -2.285196 | -2.258772 | 3.862564  |
| H                       | -3.273844          | 3.077452  | -0.491606 | C  | 1.050819  | -2.027562 | 4.842815  |
| H                       | -3.440034          | 4.841621  | -0.469504 | H  | 0.881745  | -2.375398 | 5.866698  |
| H                       | -3.203830          | 3.983094  | -2.002344 | H  | 1.430190  | -2.867583 | 4.254925  |
| Co                      | -1.388052          | 0.757678  | 0.296612  | H  | 1.826359  | -1.258260 | 4.864123  |
| C                       | 1.201322           | 1.757488  | 1.419480  | C  | -5.439933 | 0.942762  | 1.801906  |
| O                       | -0.038484          | 1.912799  | 1.308837  | C  | -5.786524 | 0.269016  | 0.447567  |
| O                       | 1.867913           | 0.935585  | 0.683691  | H  | -5.521523 | -0.793438 | 0.453170  |
| C                       | 1.960384           | 2.494250  | 2.544227  | H  | -6.862395 | 0.353075  | 0.267520  |
| C                       | 2.487968           | 1.408745  | 3.513843  | H  | -5.253749 | 0.753156  | -0.375278 |
| H                       | 3.005940           | 1.894919  | 4.346602  | C  | -5.774975 | 2.445341  | 1.738472  |
| H                       | 1.672374           | 0.813598  | 3.922985  | H  | -6.847022 | 2.571759  | 1.560198  |
| H                       | 3.184759           | 0.730282  | 3.018349  | H  | -5.524553 | 2.943980  | 2.680541  |
| C                       | 3.168188           | 3.293065  | 2.012191  | H  | -5.227126 | 2.936356  | 0.931464  |
| H                       | 2.845593           | 4.201591  | 1.507374  | C  | -6.206476 | 0.262202  | 2.945275  |
| H                       | 3.799595           | 3.587530  | 2.856663  | H  | -5.998752 | -0.810008 | 2.980764  |
| H                       | 3.783852           | 2.712908  | 1.322593  | H  | -5.938514 | 0.694083  | 3.914123  |
| C                       | 1.005770           | 3.431964  | 3.298824  | H  | -7.281236 | 0.400411  | 2.793968  |
| H                       | 1.552104           | 3.951607  | 4.092859  | C  | -3.935350 | 0.773285  | 1.948680  |
| H                       | 0.575723           | 4.176318  | 2.624929  | O  | -3.150161 | 1.429174  | 1.242503  |
| H                       | 0.184224           | 2.871116  | 3.753213  | O  | -3.526224 | -0.143107 | 2.793219  |
| C                       | 0.233870           | -1.942825 | -2.138822 | H  | -2.515584 | -0.258983 | 2.701757  |
| C                       | -0.288968          | -2.198569 | -3.409737 | C  | 5.771096  | -1.582148 | 0.690807  |
| C                       | -0.819802          | -3.466756 | -3.738844 | C  | 5.686135  | -3.090670 | 0.421587  |
| C                       | -0.856529          | -4.510426 | -2.840181 | H  | 5.276326  | -3.289436 | -0.572993 |
| C                       | -0.343703          | -4.303512 | -1.536194 |    |           |           |           |

|                                                |           |           |           |    |           |           |           |
|------------------------------------------------|-----------|-----------|-----------|----|-----------|-----------|-----------|
| H                                              | 6.686051  | -3.531609 | 0.478007  | H  | 1.278254  | 3.527132  | 4.410392  |
| H                                              | 5.046335  | -3.587981 | 1.155689  | H  | 0.472157  | 3.852312  | 2.860881  |
| C                                              | 6.315317  | -1.318259 | 2.113967  | H  | -0.112048 | 2.545189  | 3.904075  |
| H                                              | 7.316973  | -1.749253 | 2.208494  | C  | -0.007066 | -0.934861 | -2.735690 |
| H                                              | 6.377222  | -0.246361 | 2.318163  | C  | -0.626406 | -0.681098 | -3.958924 |
| H                                              | 5.673941  | -1.779594 | 2.872771  | C  | -1.427168 | -1.670917 | -4.575882 |
| C                                              | 6.681966  | -0.901138 | -0.353784 | C  | -1.613179 | -2.922974 | -4.025567 |
| H                                              | 6.307668  | -1.065827 | -1.368958 | C  | -1.017682 | -3.217567 | -2.773616 |
| H                                              | 6.745377  | 0.175542  | -0.181013 | C  | -0.265191 | -2.196282 | -2.129596 |
| H                                              | 7.689079  | -1.324916 | -0.290061 | N  | 0.256543  | -2.371174 | -0.881981 |
| C                                              | 4.379422  | -0.963893 | 0.610389  | C  | 0.188567  | -3.558847 | -0.295029 |
| O                                              | 3.353548  | -1.632998 | 0.448560  | C  | -0.490372 | -4.641873 | -0.887812 |
| O                                              | 4.362363  | 0.349383  | 0.743032  | C  | -1.117709 | -4.461812 | -2.103912 |
| H                                              | 3.400279  | 0.670592  | 0.716565  | N  | 0.874736  | -0.130621 | -2.005410 |
| <b>22s</b>                                     |           |           |           |    |           |           |           |
| Energy = -3357.12666708 ZPE = -3356.044919 H = |           |           |           |    |           |           |           |
| -3355.976145 G = -3356.142774                  |           |           |           |    |           |           |           |
| C                                              | -2.454531 | 1.017920  | -1.775808 | H  | 0.669884  | -3.643006 | 0.669558  |
| C                                              | -3.110938 | 1.740258  | -2.775565 | C  | 1.609285  | 0.799259  | -2.680015 |
| C                                              | -4.224890 | 1.199792  | -3.453508 | C  | 2.807482  | 1.350941  | -1.960907 |
| C                                              | -4.717110 | -0.060684 | -3.179672 | C  | 3.971933  | 0.580750  | -2.219587 |
| C                                              | -4.106117 | -0.822488 | -2.154809 | C  | 2.861733  | 2.549458  | -1.216526 |
| C                                              | -2.998813 | -0.261975 | -1.454386 | C  | 5.199731  | 0.978580  | -1.696357 |
| N                                              | -2.395892 | -0.931030 | -0.428943 | C  | 4.133950  | 2.873824  | -0.675601 |
| C                                              | -2.830592 | -2.131956 | -0.069681 | C  | 5.274746  | 2.121904  | -0.907092 |
| C                                              | -3.900534 | -2.766821 | -0.726994 | H  | 6.089429  | 0.390410  | -1.902455 |
| C                                              | -4.534616 | -2.115360 | -1.762558 | H  | 4.232973  | 3.722497  | -0.015539 |
| N                                              | -1.363113 | 1.417352  | -0.998138 | H  | 6.216967  | 2.423980  | -0.458917 |
| H                                              | -4.695762 | 1.802136  | -4.225457 | O  | 1.490292  | 1.081549  | -3.881559 |
| H                                              | -5.562651 | -0.471259 | -3.722118 | H  | -0.494681 | 0.280815  | -4.425241 |
| H                                              | -5.369185 | -2.577237 | -2.281961 | C  | 3.905801  | -0.662843 | -3.080388 |
| H                                              | -4.206543 | -3.755181 | -0.404760 | H  | 4.883341  | -1.150046 | -3.127460 |
| H                                              | -2.314544 | -2.604537 | 0.752747  | H  | 3.187024  | -1.378920 | -2.674762 |
| C                                              | -0.518327 | 2.367238  | -1.507955 | H  | 3.590689  | -0.417079 | -4.098711 |
| C                                              | 0.351996  | 3.269838  | -0.641822 | Co | 0.965715  | -0.747151 | -0.126447 |
| C                                              | -0.434318 | 4.221752  | 0.061774  | C  | -0.085402 | -1.630061 | 2.379483  |
| C                                              | 1.747306  | 3.517066  | -0.856560 | O  | 0.967836  | -1.568253 | 1.690227  |
| C                                              | 0.116048  | 5.449041  | 0.444289  | O  | -1.158393 | -1.024555 | 2.037428  |
| C                                              | 2.195502  | 4.827573  | -0.567514 | C  | -0.140471 | -2.507350 | 3.633961  |
| C                                              | 1.410786  | 5.780532  | 0.066700  | C  | -0.714086 | -1.700416 | 4.817740  |
| H                                              | -0.501576 | 6.165543  | 0.978891  | H  | -0.814362 | -2.357009 | 5.687246  |
| H                                              | 3.200527  | 5.112974  | -0.849344 | H  | -0.056105 | -0.873818 | 5.098220  |
| H                                              | 1.815292  | 6.767434  | 0.271237  | H  | -1.699922 | -1.289034 | 4.588856  |
| O                                              | -0.544102 | 2.743411  | -2.688486 | C  | -1.097655 | -3.681888 | 3.315885  |
| H                                              | -2.744929 | 2.715600  | -3.056844 | H  | -0.752828 | -4.265907 | 2.456839  |
| C                                              | -1.899525 | 3.984426  | 0.363109  | H  | -1.147564 | -4.353011 | 4.178358  |
| H                                              | -2.049141 | 3.063915  | 0.925136  | H  | -2.108997 | -3.322508 | 3.105427  |
| H                                              | -2.304050 | 4.822485  | 0.937981  | C  | 1.257738  | -3.040395 | 3.977402  |
| H                                              | -2.494056 | 3.894329  | -0.553211 | H  | 1.204577  | -3.657591 | 4.879236  |
| Co                                             | -1.156820 | 0.218216  | 0.516726  | H  | 1.658270  | -3.651895 | 3.165016  |
| C                                              | 1.070481  | 1.418440  | 1.670570  | H  | 1.959070  | -2.221225 | 4.157545  |
| O                                              | -0.187069 | 1.413983  | 1.637544  | C  | -5.418776 | 0.835169  | 1.984222  |
| O                                              | 1.773809  | 0.797459  | 0.797338  | C  | -6.183170 | -0.323035 | 1.299855  |
| C                                              | 1.755931  | 2.091775  | 2.863152  | H  | -6.062506 | -1.258034 | 1.852484  |
| C                                              | 2.122973  | 0.938402  | 3.829803  | H  | -7.249051 | -0.078165 | 1.258036  |
| H                                              | 2.600032  | 1.351676  | 4.723713  | H  | -5.827524 | -0.476864 | 0.276332  |
| H                                              | 1.227568  | 0.397112  | 4.143242  | C  | -5.599119 | 2.130285  | 1.178865  |
| H                                              | 2.810606  | 0.226738  | 3.366198  | H  | -6.659409 | 2.399224  | 1.150975  |
| C                                              | 3.030364  | 2.839926  | 2.448516  | H  | -5.043774 | 2.957350  | 1.630033  |
| H                                              | 2.788930  | 3.681616  | 1.796708  | H  | -5.242943 | 2.006984  | 0.152414  |
| H                                              | 3.524171  | 3.230073  | 3.344275  | C  | -5.918548 | 1.017573  | 3.432379  |
| H                                              | 3.735791  | 2.192523  | 1.925955  | H  | -5.791405 | 0.100171  | 4.012195  |
| C                                              | 0.782850  | 3.063269  | 3.551551  | H  | -5.377447 | 1.824975  | 3.936883  |

|                                                |           |           |           |    |           |           |           |
|------------------------------------------------|-----------|-----------|-----------|----|-----------|-----------|-----------|
| H                                              | -6.981766 | 1.276625  | 3.421222  | H  | 1.882957  | 0.818666  | 5.270910  |
| C                                              | -3.943997 | 0.453431  | 2.005200  | H  | 0.536570  | 0.139099  | 4.340432  |
| O                                              | -3.081854 | 1.072120  | 1.381623  | H  | 2.197611  | -0.165532 | 3.819456  |
| O                                              | -3.666652 | -0.632340 | 2.720866  | C  | 2.901249  | 2.497725  | 3.411804  |
| H                                              | -2.697763 | -0.839837 | 2.610642  | H  | 2.951878  | 3.380765  | 2.773316  |
| C                                              | 5.010692  | -2.532285 | 0.654406  | H  | 3.159153  | 2.801707  | 4.431411  |
| C                                              | 4.911319  | -3.602425 | -0.442340 | H  | 3.658322  | 1.784580  | 3.079147  |
| H                                              | 5.032432  | -3.158861 | -1.434867 | C  | 0.473912  | 2.848838  | 4.020718  |
| H                                              | 5.696932  | -4.350441 | -0.298830 | H  | 0.770742  | 3.100770  | 5.044059  |
| H                                              | 3.941458  | -4.105778 | -0.414491 | H  | 0.414964  | 3.770691  | 3.438662  |
| C                                              | 4.785994  | -3.172528 | 2.045750  | H  | -0.522735 | 2.401751  | 4.048009  |
| H                                              | 5.558102  | -3.926065 | 2.229862  | C  | 0.078070  | -1.885250 | -1.967657 |
| H                                              | 4.837296  | -2.421082 | 2.838385  | C  | -0.801645 | -2.014436 | -3.038720 |
| H                                              | 3.809001  | -3.663175 | 2.097057  | C  | -1.367821 | -3.267301 | -3.369852 |
| C                                              | 6.386267  | -1.839408 | 0.610229  | C  | -1.075332 | -4.413610 | -2.663586 |
| H                                              | 6.551741  | -1.359560 | -0.358601 | C  | -0.162885 | -4.341251 | -1.580619 |
| H                                              | 6.472200  | -1.077695 | 1.388250  | C  | 0.414320  | -3.079610 | -1.244134 |
| H                                              | 7.174274  | -2.583367 | 0.762916  | N  | 1.319281  | -2.960969 | -0.232929 |
| C                                              | 3.897901  | -1.506020 | 0.471156  | C  | 1.677034  | -4.025829 | 0.465239  |
| O                                              | 2.929767  | -1.706165 | -0.268053 | C  | 1.150815  | -5.310191 | 0.211616  |
| O                                              | 4.032013  | -0.415408 | 1.204259  | C  | 0.231633  | -5.461416 | -0.805636 |
| H                                              | 3.229889  | 0.171805  | 1.060714  | N  | 0.725071  | -0.723542 | -1.517665 |
| <b>22se</b>                                    |           |           |           |    |           |           |           |
| Energy = -3357.18674837 ZPE = -3356.110415 H = |           |           |           |    |           |           |           |
| -3356.039395 G = -3356.21494                   |           |           |           |    |           |           |           |
| C                                              | -2.657909 | 1.123425  | -2.282409 | H  | -2.068211 | -3.309722 | -4.198851 |
| C                                              | -3.248495 | 1.742078  | -3.388035 | H  | -1.525361 | -5.367684 | -2.920585 |
| C                                              | -4.310503 | 1.135742  | -4.094287 | H  | -0.194655 | -6.435634 | -1.028768 |
| C                                              | -4.803259 | -0.103727 | -3.748984 | H  | 1.472169  | -6.152073 | 0.814718  |
| C                                              | -4.237281 | -0.780717 | -2.640763 | H  | 2.390954  | -3.856145 | 1.265021  |
| C                                              | -3.189307 | -0.155972 | -1.896813 | C  | 0.949504  | 0.310689  | -2.384194 |
| N                                              | -2.635209 | -0.769767 | -0.811724 | C  | 2.212643  | 1.131496  | -2.162110 |
| C                                              | -3.023731 | -1.990717 | -0.475862 | C  | 3.331752  | 0.492981  | -2.765268 |
| C                                              | -4.035926 | -2.686789 | -1.165186 | C  | 2.322084  | 2.459951  | -1.680750 |
| C                                              | -4.652298 | -2.072494 | -2.231169 | C  | 4.518418  | 1.200835  | -2.961947 |
| N                                              | -1.628473 | 1.629834  | -1.488348 | C  | 3.524700  | 3.148266  | -1.971015 |
| H                                              | -4.733424 | 1.666282  | -4.943058 | C  | 4.601536  | 2.543990  | -2.602797 |
| H                                              | -5.604579 | -0.574134 | -4.310596 | H  | 5.363603  | 0.706609  | -3.432920 |
| H                                              | -5.446970 | -2.570414 | -2.779826 | H  | 3.606129  | 4.192995  | -1.693646 |
| H                                              | -4.311162 | -3.685120 | -0.844628 | H  | 5.502295  | 3.115310  | -2.806922 |
| H                                              | -2.515498 | -2.436140 | 0.368158  | O  | 0.370537  | 0.498061  | -3.458396 |
| C                                              | -0.874775 | 2.680978  | -1.916937 | H  | -1.072782 | -1.135430 | -3.600771 |
| C                                              | -0.021581 | 3.314958  | -0.846988 | C  | 3.259907  | -0.953562 | -3.211604 |
| C                                              | -0.738936 | 4.184117  | 0.013874  | H  | 4.171065  | -1.237381 | -3.743901 |
| C                                              | 1.382426  | 3.218589  | -0.778569 | H  | 3.144345  | -1.617783 | -2.349564 |
| C                                              | -0.050604 | 4.941633  | 0.959488  | H  | 2.409281  | -1.130454 | -3.876558 |
| C                                              | 2.023685  | 3.956800  | 0.243159  | Co | 1.633263  | -0.893484 | 0.283188  |
| C                                              | 1.330687  | 4.814092  | 1.085680  | C  | -0.413508 | -1.694018 | 2.383964  |
| H                                              | -0.599322 | 5.620502  | 1.606865  | O  | 0.798361  | -1.606283 | 2.072400  |
| H                                              | 3.091608  | 3.839594  | 0.384020  | O  | -1.345240 | -1.057545 | 1.774299  |
| H                                              | 1.866492  | 5.376558  | 1.844713  | C  | -0.826964 | -2.657444 | 3.512671  |
| O                                              | -0.902592 | 3.234474  | -3.026580 | C  | -1.609018 | -1.899786 | 4.606007  |
| H                                              | -2.863069 | 2.693990  | -3.717933 | H  | -1.948978 | -2.609196 | 5.367364  |
| C                                              | -2.243384 | 4.316248  | -0.091639 | H  | -0.978536 | -1.156042 | 5.102034  |
| H                                              | -2.739251 | 3.406577  | 0.258016  | H  | -2.488123 | -1.390327 | 4.206570  |
| H                                              | -2.598886 | 5.157733  | 0.509279  | C  | -1.735277 | -3.734804 | 2.874916  |
| H                                              | -2.558939 | 4.479257  | -1.127209 | H  | -1.229957 | -4.237383 | 2.042570  |
| Co                                             | -1.341721 | 0.567351  | 0.265302  | H  | -1.990017 | -4.492028 | 3.623172  |
| C                                              | 1.053569  | 1.429645  | 2.005823  | H  | -2.668285 | -3.301801 | 2.503964  |
| O                                              | -0.157165 | 1.499515  | 1.696347  | C  | 0.413195  | -3.322361 | 4.127953  |
| O                                              | 1.941364  | 0.897534  | 1.233508  | H  | 0.108069  | -3.999782 | 4.932102  |
| C                                              | 1.494297  | 1.874474  | 3.412216  | H  | 0.961957  | -3.899282 | 3.379495  |
| C                                              | 1.532334  | 0.579715  | 4.261735  | H  | 1.094273  | -2.574529 | 4.542791  |
|                                                |           |           |           | C  | -5.503106 | 1.005594  | 1.718067  |
|                                                |           |           |           | C  | -6.047636 | 0.522829  | 0.347889  |
|                                                |           |           |           | H  | -5.970783 | -0.564373 | 0.250204  |
|                                                |           |           |           | H  | -7.101373 | 0.804097  | 0.258814  |

|   |           |           |           |   |           |           |           |
|---|-----------|-----------|-----------|---|-----------|-----------|-----------|
| H | -5.494486 | 0.981640  | -0.476465 | H | -1.586316 | 0.854500  | -3.520614 |
| C | -5.573888 | 2.539969  | 1.794929  | H | -0.980571 | 0.397506  | -5.115925 |
| H | -6.617516 | 2.860800  | 1.724379  | C | 3.212372  | 1.327763  | 0.546116  |
| H | -5.166514 | 2.906385  | 2.742755  | C | 4.411804  | 1.581735  | 1.220521  |
| H | -5.011824 | 3.001175  | 0.980173  | C | 4.842850  | 2.900308  | 1.480834  |
| C | -6.306061 | 0.366065  | 2.862805  | C | 4.115312  | 4.002503  | 1.081048  |
| H | -6.292053 | -0.724284 | 2.799329  | C | 2.900784  | 3.807315  | 0.376512  |
| H | -5.903240 | 0.657883  | 3.837879  | C | 2.460835  | 2.477502  | 0.096682  |
| H | -7.346086 | 0.702044  | 2.808987  | N | 1.306104  | 2.249661  | -0.601395 |
| C | -4.048155 | 0.558684  | 1.742875  | C | 0.560278  | 3.271004  | -1.003290 |
| O | -3.146579 | 1.248720  | 1.245446  | C | 0.911916  | 4.613031  | -0.752122 |
| O | -3.827600 | -0.635572 | 2.249341  | C | 2.081137  | 4.875741  | -0.072086 |
| H | -2.842423 | -0.868930 | 2.143740  | N | 2.612297  | 0.095614  | 0.322870  |
| C | 6.093179  | -0.798774 | 0.199094  | H | 5.777837  | 3.040937  | 2.016898  |
| C | 6.176519  | -1.806464 | -0.959454 | H | 4.455589  | 5.012333  | 1.289481  |
| H | 5.845685  | -1.349474 | -1.895882 | H | 2.388863  | 5.897963  | 0.130598  |
| H | 7.212755  | -2.134529 | -1.083822 | H | 0.265572  | 5.411627  | -1.099481 |
| H | 5.552102  | -2.681874 | -0.768371 | H | -0.351018 | 3.017623  | -1.537553 |
| C | 6.555657  | -1.468036 | 1.518642  | C | 3.255301  | -1.076078 | 0.524076  |
| H | 7.600800  | -1.777074 | 1.419906  | C | 2.353338  | -2.302288 | 0.551613  |
| H | 6.481084  | -0.772574 | 2.360428  | C | 2.445566  | -3.148546 | 1.680378  |
| H | 5.953796  | -2.354419 | 1.742039  | C | 1.453634  | -2.624885 | -0.498560 |
| C | 6.962730  | 0.435197  | -0.098152 | C | 1.670117  | -4.313206 | 1.724587  |
| H | 6.611369  | 0.953149  | -0.994818 | C | 0.733435  | -3.831873 | -0.443200 |
| H | 6.948377  | 1.143253  | 0.733335  | C | 0.836511  | -4.666706 | 0.666319  |
| H | 7.996534  | 0.117155  | -0.264089 | H | 1.726550  | -4.950888 | 2.602681  |
| C | 4.639616  | -0.403891 | 0.428646  | H | 0.080125  | -4.090435 | -1.264386 |
| O | 3.713264  | -1.210818 | 0.221286  | H | 0.262359  | -5.587548 | 0.705241  |
| O | 4.451953  | 0.797654  | 0.915147  | O | 4.474090  | -1.252903 | 0.718743  |
| H | 3.464258  | 0.948413  | 1.115966  | H | 5.007690  | 0.742899  | 1.549753  |

### 30bt

Energy = -2172.51637808 ZPE = -2171.854705 H =

-2171.81085 G = -2171.931954

|   |           |           |           |
|---|-----------|-----------|-----------|
| C | -3.338718 | -0.661183 | -0.726738 |
| C | -4.080047 | -1.795874 | -0.446388 |
| C | -5.342138 | -1.673950 | 0.183477  |
| C | -5.859720 | -0.447101 | 0.538066  |
| C | -5.124071 | 0.735348  | 0.258611  |
| C | -3.859034 | 0.636084  | -0.392001 |
| N | -3.098574 | 1.723946  | -0.702692 |
| C | -3.554210 | 2.919239  | -0.374299 |
| C | -4.790114 | 3.129645  | 0.284316  |
| C | -5.571350 | 2.039512  | 0.595649  |
| N | -2.062141 | -0.633386 | -1.286570 |
| H | -5.902991 | -2.578716 | 0.396685  |
| H | -6.823789 | -0.367357 | 1.031079  |
| H | -6.526727 | 2.160493  | 1.098489  |
| H | -5.103088 | 4.138147  | 0.531973  |
| H | -2.922652 | 3.767608  | -0.630035 |
| C | -1.274488 | -1.649775 | -1.737012 |
| C | 0.098856  | -1.203185 | -2.229091 |
| C | 0.111102  | -0.506504 | -3.496730 |
| C | 1.339568  | -1.744808 | -1.712723 |
| C | 1.305869  | -0.362741 | -4.188545 |
| C | 2.520990  | -1.575802 | -2.491163 |
| C | 2.509109  | -0.901494 | -3.694576 |
| H | 1.303093  | 0.154447  | -5.143400 |
| H | 3.444498  | -1.997937 | -2.109415 |
| H | 3.425350  | -0.795303 | -4.266777 |
| O | -1.655791 | -2.817595 | -1.810549 |
| H | -3.681572 | -2.767459 | -0.701850 |
| C | -1.167305 | 0.029190  | -4.104880 |
| H | -1.940224 | -0.744434 | -4.163241 |

|    |           |           |           |
|----|-----------|-----------|-----------|
| H  | -1.586316 | 0.854500  | -3.520614 |
| H  | -0.980571 | 0.397506  | -5.115925 |
| C  | 3.212372  | 1.327763  | 0.546116  |
| C  | 4.411804  | 1.581735  | 1.220521  |
| C  | 4.842850  | 2.900308  | 1.480834  |
| C  | 4.115312  | 4.002503  | 1.081048  |
| C  | 2.900784  | 3.807315  | 0.376512  |
| C  | 2.460835  | 2.477502  | 0.096682  |
| N  | 1.306104  | 2.249661  | -0.601395 |
| C  | 0.560278  | 3.271004  | -1.003290 |
| C  | 0.911916  | 4.613031  | -0.752122 |
| C  | 2.081137  | 4.875741  | -0.072086 |
| N  | 2.612297  | 0.095614  | 0.322870  |
| H  | 5.777837  | 3.040937  | 2.016898  |
| H  | 4.455589  | 5.012333  | 1.289481  |
| H  | 2.388863  | 5.897963  | 0.130598  |
| H  | 0.265572  | 5.411627  | -1.099481 |
| H  | -0.351018 | 3.017623  | -1.537553 |
| C  | 3.255301  | -1.076078 | 0.524076  |
| C  | 2.353338  | -2.302288 | 0.551613  |
| C  | 2.445566  | -3.148546 | 1.680378  |
| C  | 1.453634  | -2.624885 | -0.498560 |
| C  | 1.670117  | -4.313206 | 1.724587  |
| C  | 0.733435  | -3.831873 | -0.443200 |
| C  | 0.836511  | -4.666706 | 0.666319  |
| H  | 1.726550  | -4.950888 | 2.602681  |
| H  | 0.080125  | -4.090435 | -1.264386 |
| H  | 0.262359  | -5.587548 | 0.705241  |
| O  | 4.474090  | -1.252903 | 0.718743  |
| H  | 5.007690  | 0.742899  | 1.549753  |
| C  | 3.330857  | -2.809513 | 2.859059  |
| H  | 3.171890  | -1.778502 | 3.191980  |
| H  | 3.123784  | -3.476656 | 3.699966  |
| H  | 4.386379  | -2.889193 | 2.590077  |
| Co | 0.957235  | 0.274614  | -0.901284 |
| H  | -1.674696 | 0.304481  | -1.262652 |
| C  | -1.608764 | 0.075854  | 2.958753  |
| C  | -0.641386 | -0.142492 | 4.147573  |
| H  | 0.271338  | 0.450330  | 4.025735  |
| H  | -1.130154 | 0.170174  | 5.075472  |
| H  | -0.361469 | -1.195208 | 4.238743  |
| C  | -2.881922 | -0.774209 | 3.152225  |
| H  | -3.398874 | -0.447387 | 4.059866  |
| H  | -3.568419 | -0.658690 | 2.309122  |
| H  | -2.639387 | -1.834330 | 3.255095  |
| C  | -1.971846 | 1.562051  | 2.835056  |
| H  | -1.082299 | 2.172881  | 2.660508  |
| H  | -2.664520 | 1.731005  | 2.007878  |
| H  | -2.450852 | 1.898393  | 3.759490  |
| C  | -0.869002 | -0.378099 | 1.706041  |
| O  | -0.675151 | -1.697633 | 1.661623  |
| O  | -0.457692 | 0.385038  | 0.838756  |
| H  | -0.098645 | -1.925093 | 0.904458  |

### Ag2CO3

Energy = -557.957158949 ZPE = -555.372006 H = -555.363982 G = -555.407473

|   |           |           |           |
|---|-----------|-----------|-----------|
| C | -0.000029 | 1.012585  | -0.000023 |
| O | 1.126282  | 1.634776  | -0.000198 |
| O | -1.126526 | 1.634587  | 0.000210  |
| O | 0.000045  | -0.312221 | -0.000082 |

### AgOPiv

Energy = -493.589320787 ZPE = -492.113236 H = -

492.102261 G = -492.150509  
 C -0.708576 0.051708 -0.000564  
 O -0.101574 -1.066270 -0.000349  
 O -0.120279 1.171810 -0.000446  
 C -2.256524 0.003794 -0.000164  
 C -2.709606 -0.767848 -1.256611  
 H -2.402286 -0.246801 -2.170407  
 H -2.272773 -1.769382 -1.270411  
 H -3.801465 -0.860080 -1.272144  
 C -2.707870 -0.758013 1.263029  
 H -2.270715 -1.759301 1.284318  
 H -2.399686 -0.229517 2.172238  
 H -3.799669 -0.850567 1.280534  
 C -2.857767 1.415727 -0.005188  
 H -2.541161 1.981186 0.875659  
 H -2.542110 1.974471 -0.890703  
 H -3.952312 1.358017 -0.004480

**B**

Energy = -2172.54118572 ZPE = -2171.877591 H =  
 -2171.835217 G = -2171.949166

C -2.669433 -1.355131 -0.912574  
 C -3.570166 -2.271818 -1.460941  
 C -4.954220 -2.000878 -1.495612  
 C -5.488014 -0.834605 -0.984752  
 C -4.618193 0.126413 -0.415624  
 C -3.218578 -0.147388 -0.389171  
 N -2.334330 0.748107 0.144054  
 C -2.764533 1.895996 0.650181  
 C -4.131290 2.237735 0.660252  
 C -5.051551 1.359735 0.132664  
 N -1.275814 -1.438174 -0.888248  
 H -5.612727 -2.742908 -1.938195  
 H -6.555370 -0.640071 -1.011474  
 H -6.110914 1.599313 0.128260  
 H -4.431841 3.188648 1.084836  
 H -2.009461 2.556299 1.053080  
 C -0.692655 -2.682536 -0.941740  
 C 0.746498 -2.757613 -1.364801  
 C 1.659358 -3.589528 -0.682077  
 C 1.142837 -2.087555 -2.528205  
 C 2.959113 -3.698654 -1.192311  
 C 2.432439 -2.230071 -3.037538  
 C 3.347114 -3.037526 -2.360749  
 H 0.427314 -1.450050 -3.032692  
 H 3.680810 -4.316309 -0.663914  
 H 2.721123 -1.710435 -3.946389  
 H 4.360833 -3.150920 -2.734179  
 O -1.286018 -3.748548 -0.708136  
 H -3.202501 -3.204859 -1.862162  
 C 1.281455 -4.348623 0.568946  
 H 2.175458 -4.666327 1.112270  
 H 0.663223 -3.749259 1.242455  
 H 0.690756 -5.234788 0.319318  
 C 0.632503 2.737933 0.004283  
 C 1.309499 3.916356 0.320586  
 C 1.703329 4.811009 -0.701644  
 C 1.428629 4.576741 -2.033501  
 C 0.731728 3.396332 -2.400670  
 C 0.352983 2.478537 -1.380568  
 N -0.296692 1.312674 -1.672884  
 C -0.637008 1.037969 -2.919866  
 C -0.318661 1.899356 -3.992269  
 C 0.373155 3.062925 -3.733008

N 0.174067 1.755627 0.864633  
 H 2.234898 5.714429 -0.416162  
 H 1.730002 5.279928 -2.803572  
 H 0.643792 3.739052 -4.539113  
 H -0.614382 1.629681 -4.999906  
 H -1.172430 0.106506 -3.070722  
 C 0.353644 1.716607 2.220993  
 C -0.176526 0.429566 2.775313  
 C -0.190171 0.122130 4.152926  
 C -0.637314 -0.496660 1.810815  
 C -0.687157 -1.134937 4.532119  
 C -1.134789 -1.735844 2.223292  
 C -1.151544 -2.050977 3.589638  
 H 1.234978 -1.436081 1.716594  
 H -0.705598 -1.396054 5.587048  
 H -1.503938 -2.455564 1.500659  
 H -1.529509 -3.016311 3.916702  
 O 0.884833 2.612133 2.897140  
 H 1.526408 4.132202 1.356307  
 C 0.309814 1.073225 5.214151  
 H 0.168768 0.644531 6.210455  
 H 1.370354 1.298434 5.071638  
 H -0.208058 2.034605 5.163512  
 Co -0.507839 0.186208 0.012738  
 C 2.369911 -0.520112 0.524745  
 O 1.448219 -0.213697 -0.236999  
 O 2.197460 -1.278181 1.595944  
 C 3.774297 0.032455 0.355196  
 C 4.830630 -1.068480 0.565099  
 H 5.828568 -0.623650 0.506321  
 H 4.721543 -1.542043 1.543744  
 H 4.748609 -1.839624 -0.204433  
 C 3.915152 0.676171 -1.032232  
 H 3.195576 1.488250 -1.163474  
 H 4.924211 1.084913 -1.139512  
 H 3.749215 -0.059672 -1.822772  
 C 3.915133 1.117076 1.458167  
 H 4.899410 1.586231 1.366186  
 H 3.151397 1.893133 1.356146  
 H 3.830054 0.677854 2.455645

**BQNH**

Energy = -841.052121483 ZPE = -840.779763 H = -  
 840.762995 G = -840.82419

C 1.235563 -0.716704 -0.142968  
 C 1.589336 -2.036923 -0.371646  
 C 2.954408 -2.410492 -0.403578  
 C 3.962525 -1.492356 -0.210909  
 C 3.634588 -0.131583 0.026268  
 C 2.264534 0.266792 0.061517  
 N 1.875398 1.553848 0.282751  
 C 2.811843 2.466033 0.472343  
 C 4.198155 2.179179 0.458126  
 C 4.604439 0.882934 0.235292  
 N -0.069491 -0.218809 -0.092310  
 H 3.199658 -3.452687 -0.585140  
 H 5.006453 -1.790497 -0.236334  
 H 5.658944 0.621568 0.216453  
 H 4.915188 2.976651 0.621140  
 H 2.471499 3.485112 0.646533  
 C -1.257398 -0.893913 -0.229452  
 C -2.474050 -0.012825 -0.190494  
 C -3.649524 -0.448225 0.463656  
 C -2.451899 1.229275 -0.845202

|   |           |           |           |
|---|-----------|-----------|-----------|
| C | -4.761112 | 0.404108  | 0.448966  |
| C | -3.575994 | 2.053419  | -0.859638 |
| C | -4.734823 | 1.638054  | -0.203865 |
| H | -5.666636 | 0.091191  | 0.961926  |
| H | -3.545407 | 3.006099  | -1.379193 |
| H | -5.618132 | 2.270063  | -0.199753 |
| O | -1.329223 | -2.115481 | -0.374272 |
| H | 0.814402  | -2.774298 | -0.521316 |
| C | -3.738431 | -1.776651 | 1.178225  |
| H | -4.647318 | -1.827089 | 1.783489  |
| H | -3.746027 | -2.603303 | 0.462831  |
| H | -2.875972 | -1.943538 | 1.830014  |
| H | -0.091885 | 0.775866  | 0.112832  |
| H | -1.555293 | 1.542713  | -1.372228 |

**BQN**

Energy = -840.530392241 ZPE = -840.272647 H = -  
840.256939 G = -840.315034

|   |           |           |           |
|---|-----------|-----------|-----------|
| C | 1.155384  | -0.638909 | -0.047797 |
| C | 1.465328  | -2.013566 | -0.109159 |
| C | 2.789047  | -2.491828 | -0.078575 |
| C | 3.870864  | -1.639276 | 0.002609  |
| C | 3.637406  | -0.241400 | 0.054520  |
| C | 2.295228  | 0.276302  | 0.028613  |
| N | 2.058944  | 1.619213  | 0.070493  |
| C | 3.083379  | 2.450858  | 0.138288  |
| C | 4.436634  | 2.041380  | 0.173743  |
| C | 4.703931  | 0.692843  | 0.131268  |
| N | -0.092742 | -0.073511 | -0.023607 |
| H | 2.954310  | -3.566849 | -0.122571 |
| H | 4.891514  | -2.012476 | 0.023821  |
| H | 5.726779  | 0.323228  | 0.154452  |
| H | 5.231070  | 2.779330  | 0.231896  |
| H | 2.844185  | 3.514694  | 0.167911  |
| C | -1.217716 | -0.781405 | -0.216028 |
| C | -2.479502 | 0.067650  | -0.102026 |
| C | -3.742895 | -0.494156 | 0.208742  |
| C | -2.395238 | 1.450931  | -0.336941 |
| C | -4.858920 | 0.356279  | 0.264749  |
| C | -3.516410 | 2.277255  | -0.290903 |
| C | -4.762191 | 1.725011  | 0.012362  |
| H | -5.827785 | -0.070571 | 0.515496  |
| H | -3.417969 | 3.341985  | -0.486748 |
| H | -5.649583 | 2.351111  | 0.058259  |
| O | -1.356510 | -2.004676 | -0.488254 |
| H | 0.640161  | -2.706736 | -0.184372 |
| C | -3.949100 | -1.963713 | 0.505508  |
| H | -4.954165 | -2.135328 | 0.905449  |
| H | -3.814682 | -2.570411 | -0.393320 |
| H | -3.212774 | -2.334746 | 1.222689  |
| H | -1.413782 | 1.858736  | -0.548963 |

**B-q**

Energy = -2172.4859705 ZPE = -2171.827624 H = -  
2171.783362 G = -2171.905987

|   |           |           |          |
|---|-----------|-----------|----------|
| C | -2.739391 | 1.546188  | 0.823825 |
| C | -3.700996 | 2.560294  | 0.845358 |
| C | -5.027957 | 2.299879  | 1.250180 |
| C | -5.442432 | 1.039020  | 1.629654 |
| C | -4.508728 | -0.029382 | 1.616287 |
| C | -3.166985 | 0.233296  | 1.218577 |
| N | -2.235736 | -0.754909 | 1.176461 |
| C | -2.557259 | -1.997516 | 1.507330 |
| C | -3.855986 | -2.345355 | 1.926053 |

|    |           |           |           |
|----|-----------|-----------|-----------|
| C  | -4.825570 | -1.363005 | 1.976850  |
| N  | -1.387754 | 1.683136  | 0.526000  |
| H  | -5.736089 | 3.123123  | 1.258021  |
| H  | -6.466180 | 0.850899  | 1.937322  |
| H  | -5.838925 | -1.600730 | 2.287851  |
| H  | -4.077439 | -3.372035 | 2.194582  |
| H  | -1.760709 | -2.729996 | 1.421888  |
| C  | -0.946485 | 2.803781  | -0.170345 |
| C  | 0.459652  | 3.232228  | 0.116228  |
| C  | 1.292777  | 3.751812  | -0.900071 |
| C  | 0.921503  | 3.163999  | 1.436758  |
| C  | 2.574659  | 4.182874  | -0.538005 |
| C  | 2.196765  | 3.609627  | 1.779843  |
| C  | 3.027956  | 4.120525  | 0.782933  |
| H  | 0.260813  | 2.760855  | 2.195683  |
| H  | 3.232754  | 4.576591  | -1.308286 |
| H  | 2.536072  | 3.554080  | 2.809726  |
| H  | 4.027727  | 4.468224  | 1.026725  |
| O  | -1.642750 | 3.428218  | -0.979699 |
| H  | -3.426555 | 3.561671  | 0.543608  |
| C  | 0.864668  | 3.812439  | -2.347644 |
| H  | 1.718839  | 4.038141  | -2.991752 |
| H  | 0.431254  | 2.862293  | -2.672905 |
| H  | 0.095479  | 4.573538  | -2.500129 |
| C  | 1.351233  | -2.486437 | 0.621685  |
| C  | 2.200032  | -3.576266 | 0.397855  |
| C  | 3.196375  | -3.931884 | 1.335202  |
| C  | 3.376538  | -3.242525 | 2.515674  |
| C  | 2.536513  | -2.135600 | 2.799875  |
| C  | 1.539543  | -1.756374 | 1.851566  |
| N  | 0.722554  | -0.688296 | 2.077981  |
| C  | 0.818715  | -0.003329 | 3.206752  |
| C  | 1.765484  | -0.314882 | 4.204021  |
| C  | 2.625653  | -1.370381 | 3.991374  |
| N  | 0.346764  | -1.995329 | -0.192497 |
| H  | 3.834200  | -4.782174 | 1.108913  |
| H  | 4.140927  | -3.531003 | 3.230596  |
| H  | 3.376116  | -1.632678 | 4.732054  |
| H  | 1.807664  | 0.279163  | 5.110055  |
| H  | 0.126612  | 0.824020  | 3.326542  |
| C  | -0.026345 | -2.585138 | -1.361400 |
| C  | -1.079142 | -1.788516 | -2.098945 |
| C  | -1.815650 | -2.316285 | -3.189153 |
| C  | -1.302968 | -0.464330 | -1.704851 |
| C  | -2.740556 | -1.470690 | -3.822242 |
| C  | -2.216292 | 0.370271  | -2.339130 |
| C  | -2.938486 | -0.149150 | -3.421073 |
| H  | 0.477092  | 0.204165  | -2.323991 |
| H  | -3.317798 | -1.863416 | -4.655543 |
| H  | -2.366738 | 1.396550  | -2.015985 |
| H  | -3.656475 | 0.475803  | -3.946825 |
| O  | 0.417897  | -3.649841 | -1.828614 |
| H  | 2.078843  | -4.147823 | -0.509681 |
| C  | -1.662977 | -3.734761 | -3.688862 |
| H  | -0.673274 | -3.894821 | -4.124255 |
| H  | -1.750867 | -4.457660 | -2.874159 |
| H  | -2.423127 | -3.954589 | -4.444550 |
| Co | -0.410544 | -0.101644 | 0.366114  |
| C  | 2.123260  | 0.402760  | -1.406957 |
| O  | 1.571570  | 0.578446  | -0.322429 |
| O  | 1.442049  | 0.256461  | -2.538797 |
| C  | 3.632076  | 0.293456  | -1.568764 |
| C  | 4.108299  | 1.330575  | -2.607490 |
| H  | 5.190452  | 1.238288  | -2.741753 |



|                                                |           |           |           |                                                |           |           |           |
|------------------------------------------------|-----------|-----------|-----------|------------------------------------------------|-----------|-----------|-----------|
| H                                              | 3.624280  | 1.173627  | -3.574527 | C                                              | -0.011103 | -0.153738 | -2.794546 |
| H                                              | 3.890585  | 2.348052  | -2.270049 | C                                              | -0.021732 | 0.298796  | -4.131865 |
| C                                              | 4.309916  | 0.531752  | -0.211872 | C                                              | -0.681534 | 0.564313  | -1.785669 |
| H                                              | 3.971279  | -0.198797 | 0.528209  | C                                              | -0.727547 | 1.478772  | -4.409131 |
| H                                              | 5.393886  | 0.434443  | -0.325529 | C                                              | -1.392313 | 1.726607  | -2.086064 |
| H                                              | 4.086540  | 1.531266  | 0.169406  | C                                              | -1.400690 | 2.183351  | -3.410273 |
| C                                              | 3.932403  | -1.140313 | -2.069339 | H                                              | 1.299308  | 1.757400  | -1.453320 |
| H                                              | 5.014006  | -1.260478 | -2.186007 | H                                              | -0.747838 | 1.850672  | -5.430084 |
| H                                              | 3.578651  | -1.887975 | -1.352305 | H                                              | -1.921635 | 2.279088  | -1.318402 |
| H                                              | 3.454949  | -1.330660 | -3.033754 | H                                              | -1.937313 | 3.094513  | -3.661231 |
| <b>B-t</b>                                     |           |           |           | O                                              | 1.419135  | -2.096441 | -3.052095 |
| Energy = -2172.52076082 ZPE = -2171.859923 H = |           |           |           | H                                              | 2.342523  | -3.552319 | -1.614763 |
| -2171.816324 G = -2171.935402                  |           |           |           | C                                              | 0.694300  | -0.426636 | -5.245339 |
| C                                              | -3.019531 | 0.874676  | 0.934463  | H                                              | 0.539874  | 0.086940  | -6.198289 |
| C                                              | -4.026226 | 1.633011  | 1.534488  | H                                              | 1.767431  | -0.491892 | -5.046113 |
| C                                              | -5.379714 | 1.235569  | 1.481039  | H                                              | 0.344078  | -1.458333 | -5.336820 |
| C                                              | -5.781396 | 0.088881  | 0.827421  | Co                                             | -0.523263 | -0.233675 | -0.018593 |
| C                                              | -4.802541 | -0.719845 | 0.200581  | C                                              | 2.547336  | 0.856251  | -0.360568 |
| C                                              | -3.430871 | -0.326145 | 0.263363  | O                                              | 1.681698  | 0.447867  | 0.401255  |
| N                                              | -2.460982 | -1.078062 | -0.319676 | O                                              | 2.268461  | 1.653091  | -1.400975 |
| C                                              | -2.761399 | -2.190124 | -0.965657 | C                                              | 4.013332  | 0.456885  | -0.275130 |
| C                                              | -4.089399 | -2.655435 | -1.076877 | C                                              | 4.905996  | 1.714153  | -0.267236 |
| C                                              | -5.099975 | -1.920994 | -0.495013 | H                                              | 5.957596  | 1.411396  | -0.249585 |
| N                                              | -1.642625 | 1.129743  | 1.007426  | H                                              | 4.736992  | 2.324934  | -1.157521 |
| H                                              | -6.119527 | 1.862396  | 1.970994  | H                                              | 4.707464  | 2.327187  | 0.615799  |
| H                                              | -6.825997 | -0.203828 | 0.786616  | C                                              | 4.232944  | -0.373279 | 0.998077  |
| H                                              | -6.133416 | -2.249793 | -0.560608 | H                                              | 3.623608  | -1.280787 | 0.985055  |
| H                                              | -4.293673 | -3.575471 | -1.613128 | H                                              | 5.286046  | -0.661944 | 1.069260  |
| H                                              | -1.925915 | -2.725888 | -1.406456 | H                                              | 3.966417  | 0.203379  | 1.888048  |
| C                                              | -1.215938 | 2.428746  | 1.181788  | C                                              | 4.315051  | -0.397319 | -1.532117 |
| C                                              | 0.198338  | 2.608536  | 1.657915  | H                                              | 5.347403  | -0.757678 | -1.481938 |
| C                                              | 1.057189  | 3.544906  | 1.043672  | H                                              | 3.649528  | -1.263148 | -1.596486 |
| C                                              | 0.630360  | 1.890302  | 2.778866  | H                                              | 4.196706  | 0.192599  | -2.444767 |
| C                                              | 2.347414  | 3.695130  | 1.566054  | <b>C</b>                                       |           |           |           |
| C                                              | 1.908675  | 2.073284  | 3.302783  | Energy = -2172.52316383 ZPE = -2171.862428 H = |           |           |           |
| C                                              | 2.775164  | 2.974185  | 2.684307  | -2171.820374 G = -2171.933623                  |           |           |           |
| H                                              | -0.047630 | 1.180782  | 3.237406  | C                                              | -0.089721 | 2.671933  | 0.822625  |
| H                                              | 3.030894  | 4.390711  | 1.086050  | C                                              | -0.576102 | 3.920160  | 1.232120  |
| H                                              | 2.226798  | 1.511103  | 4.175822  | C                                              | 0.296161  | 4.944946  | 1.646516  |
| H                                              | 3.781020  | 3.119879  | 3.067985  | C                                              | 1.667668  | 4.779039  | 1.676546  |
| O                                              | -1.911306 | 3.437410  | 0.984436  | C                                              | 2.212197  | 3.535198  | 1.279704  |
| H                                              | -3.766954 | 2.547237  | 2.048970  | C                                              | 1.327369  | 2.491291  | 0.871515  |
| C                                              | 0.636459  | 4.360112  | -0.157327 | N                                              | 1.801503  | 1.266351  | 0.489573  |
| H                                              | 0.107275  | 3.755523  | -0.899679 | C                                              | 3.109105  | 1.042805  | 0.461404  |
| H                                              | -0.057545 | 5.152768  | 0.136048  | C                                              | 4.047667  | 2.023586  | 0.837134  |
| H                                              | 1.505515  | 4.815380  | -0.639600 | C                                              | 3.602037  | 3.257841  | 1.252396  |
| C                                              | 1.121216  | -2.517359 | -0.196655 | N                                              | -0.811581 | 1.625485  | 0.267447  |
| C                                              | 2.045818  | -3.488394 | -0.578473 | H                                              | -0.135037 | 5.895640  | 1.947946  |
| C                                              | 2.586037  | -4.380388 | 0.379005  | H                                              | 2.330492  | 5.577394  | 1.993957  |
| C                                              | 2.218107  | -4.345574 | 1.707385  | H                                              | 4.302876  | 4.030141  | 1.555858  |
| C                                              | 1.267241  | -3.383002 | 2.138251  | H                                              | 5.103843  | 1.783481  | 0.795751  |
| C                                              | 0.740227  | -2.468052 | 1.185237  | H                                              | 3.444653  | 0.068107  | 0.136691  |
| N                                              | -0.159881 | -1.504005 | 1.543193  | C                                              | -2.192443 | 1.602323  | 0.512505  |
| C                                              | -0.603313 | -1.438318 | 2.788418  | C                                              | -3.119986 | 1.186265  | -0.591981 |
| C                                              | -0.146429 | -2.314705 | 3.793743  | C                                              | -4.524952 | 1.112838  | -0.393480 |
| C                                              | 0.793331  | -3.271812 | 3.470251  | C                                              | -2.604144 | 0.956394  | -1.875694 |
| N                                              | 0.496876  | -1.563118 | -0.988721 | C                                              | -5.332296 | 0.826322  | -1.506100 |
| H                                              | 3.310094  | -5.116860 | 0.042653  | C                                              | -3.421226 | 0.680597  | -2.965547 |
| H                                              | 2.635352  | -5.042716 | 2.427139  | C                                              | -4.803067 | 0.621787  | -2.779388 |
| H                                              | 1.173298  | -3.953134 | 4.226241  | H                                              | -1.535643 | 0.969857  | -1.996335 |
| H                                              | -0.531912 | -2.218625 | 4.802337  | H                                              | -6.407878 | 0.764730  | -1.363285 |
| H                                              | -1.333553 | -0.661507 | 2.988874  | H                                              | -2.983500 | 0.508089  | -3.944351 |
| C                                              | 0.713475  | -1.376696 | -2.332669 | H                                              | -5.464876 | 0.408884  | -3.614113 |

|    |           |           |           |    |           |           |           |
|----|-----------|-----------|-----------|----|-----------|-----------|-----------|
| O  | -2.663828 | 2.005458  | 1.583652  | C  | 4.543277  | 0.020444  | -0.815696 |
| H  | -1.641285 | 4.106270  | 1.228922  | C  | 3.152456  | 0.260276  | -0.601293 |
| C  | -5.214668 | 1.323882  | 0.934641  | N  | 2.323096  | -0.727766 | -0.154564 |
| H  | -6.278897 | 1.085947  | 0.846651  | C  | 2.801936  | -1.937967 | 0.093077  |
| H  | -4.778000 | 0.705178  | 1.721937  | C  | 4.162636  | -2.257186 | -0.093326 |
| H  | -5.110576 | 2.357390  | 1.274858  | C  | 5.027015  | -1.285096 | -0.544607 |
| C  | 2.235150  | -1.547002 | -1.495067 | N  | 1.175096  | 1.597942  | -0.672425 |
| C  | 3.166841  | -2.486067 | -1.893779 | H  | 5.390158  | 3.134894  | -1.875098 |
| C  | 3.773616  | -2.388403 | -3.170164 | H  | 6.415336  | 0.911639  | -1.449101 |
| C  | 3.462405  | -1.360603 | -4.032809 | H  | 6.080418  | -1.502484 | -0.697894 |
| C  | 2.512941  | -0.377273 | -3.650926 | H  | 4.503588  | -3.263755 | 0.122027  |
| C  | 1.874542  | -0.493256 | -2.381724 | H  | 2.086927  | -2.668176 | 0.448345  |
| N  | 0.947731  | 0.419184  | -1.952668 | C  | 0.590278  | 2.822945  | -0.462786 |
| C  | 0.702867  | 1.483094  | -2.699536 | C  | -0.861667 | 2.979689  | -0.822938 |
| C  | 1.291881  | 1.684282  | -3.966975 | C  | -1.763523 | 3.647742  | 0.032838  |
| C  | 2.177655  | 0.746681  | -4.448685 | C  | -1.267462 | 2.598523  | -2.105336 |
| N  | 1.542216  | -1.552673 | -0.241553 | C  | -3.056573 | 3.898820  | -0.440017 |
| H  | 4.501951  | -3.138720 | -3.460720 | C  | -2.555015 | 2.872638  | -2.567749 |
| H  | 3.942768  | -1.281425 | -5.003202 | C  | -3.455693 | 3.526606  | -1.727401 |
| H  | 2.641585  | 0.864662  | -5.423586 | H  | -0.560466 | 2.080716  | -2.742410 |
| H  | 1.037313  | 2.570051  | -4.537589 | H  | -3.767474 | 4.394449  | 0.216767  |
| H  | 0.014277  | 2.208350  | -2.278639 | H  | -2.850506 | 2.574263  | -3.569830 |
| C  | 2.218633  | -1.883349 | 0.990715  | H  | -4.465665 | 3.743102  | -2.065018 |
| C  | 1.357564  | -1.521688 | 2.133850  | O  | 1.197894  | 3.832546  | -0.062921 |
| C  | 1.535271  | -2.072911 | 3.426470  | H  | 3.003009  | 3.539759  | -1.474286 |
| C  | 0.359502  | -0.562110 | 1.862501  | C  | -1.377468 | 4.041452  | 1.438335  |
| C  | 0.664883  | -1.638349 | 4.429435  | H  | -2.230931 | 4.475939  | 1.967374  |
| C  | -0.475167 | -0.130697 | 2.891652  | H  | -1.048633 | 3.155722  | 1.989311  |
| C  | -0.320577 | -0.680219 | 4.168094  | H  | -0.556841 | 4.762277  | 1.432844  |
| H  | 0.683327  | -2.329716 | -0.300180 | C  | -0.663699 | -2.703707 | -0.367103 |
| H  | 0.762079  | -2.050639 | 5.430212  | C  | -1.310832 | -3.932970 | -0.206148 |
| H  | -1.235644 | 0.619732  | 2.711127  | C  | -1.797733 | -4.640812 | -1.327858 |
| H  | -0.976268 | -0.358338 | 4.973810  | C  | -1.649253 | -4.175145 | -2.619351 |
| O  | 3.336606  | -2.374128 | 1.026399  | C  | -0.986445 | -2.939330 | -2.835355 |
| H  | 3.440913  | -3.286181 | -1.219984 | C  | -0.509861 | -2.206441 | -1.709859 |
| C  | 2.603989  | -3.093022 | 3.734584  | N  | 0.115288  | -1.002794 | -1.854237 |
| H  | 2.485984  | -3.478774 | 4.750723  | C  | 0.336560  | -0.511132 | -3.059123 |
| H  | 2.570023  | -3.933022 | 3.034011  | C  | -0.086793 | -1.173842 | -4.232694 |
| H  | 3.603052  | -2.657626 | 3.638621  | C  | -0.754620 | -2.373815 | -4.117110 |
| Co | 0.362196  | 0.028877  | 0.032314  | N  | -0.129066 | -1.887348 | 0.604289  |
| C  | -1.367250 | -2.315536 | -0.154833 | H  | -2.302592 | -5.588197 | -1.157195 |
| O  | -1.243673 | -1.052651 | -0.271165 | H  | -2.023342 | -4.737107 | -3.469809 |
| O  | -0.399967 | -3.129343 | -0.250745 | H  | -1.103777 | -2.902924 | -4.999772 |
| C  | -2.776034 | -2.855037 | 0.131804  | H  | 0.111449  | -0.728011 | -5.201404 |
| C  | -3.320419 | -2.107579 | 1.366902  | H  | 0.860295  | 0.438602  | -3.092369 |
| H  | -4.331305 | -2.459246 | 1.598772  | C  | -0.170002 | -2.099180 | 1.957249  |
| H  | -2.685748 | -2.277984 | 2.243010  | C  | 0.434173  | -0.939548 | 2.677772  |
| H  | -3.354469 | -1.033960 | 1.180514  | C  | 0.632800  | -0.910059 | 4.076705  |
| C  | -3.665411 | -2.564043 | -1.093494 | C  | 0.780148  | 0.158657  | 1.863504  |
| H  | -3.288477 | -3.079966 | -1.983693 | C  | 1.203769  | 0.245000  | 4.627932  |
| H  | -4.683972 | -2.918988 | -0.903074 | C  | 1.365283  | 1.287060  | 2.439876  |
| H  | -3.704585 | -1.495788 | -1.301872 | C  | 1.569411  | 1.327208  | 3.822662  |
| C  | -2.727194 | -4.365406 | 0.404218  | H  | 1.369938  | 0.291957  | 5.701921  |
| H  | -3.737869 | -4.735061 | 0.607249  | H  | 1.642587  | 2.139198  | 1.828918  |
| H  | -2.325913 | -4.909995 | -0.454666 | H  | 2.015097  | 2.208650  | 4.279944  |
| H  | -2.096735 | -4.591265 | 1.269153  | O  | -0.630072 | -3.117373 | 2.506405  |
|    |           |           |           | H  | -1.433810 | -4.327338 | 0.791663  |
|    |           |           |           | C  | 0.259533  | -2.058871 | 4.985818  |
|    |           |           |           | H  | 0.527015  | -1.830783 | 6.022544  |
|    |           |           |           | H  | -0.811596 | -2.273842 | 4.935179  |
|    |           |           |           | H  | 0.760112  | -2.984505 | 4.687280  |
|    |           |           |           | Co | 0.460387  | -0.169652 | 0.004601  |
|    |           |           |           | C  | -2.280088 | 0.422003  | 0.900133  |
|    |           |           |           | O  | -1.412993 | 0.281780  | -0.045358 |

**C'**  
Energy = -2172.05877666 ZPE = -2171.409342 H =  
-2171.367059 G = -2171.481229

|   |          |          |           |
|---|----------|----------|-----------|
| C | 2.554688 | 1.538582 | -0.837722 |
| C | 3.404880 | 2.553317 | -1.292821 |
| C | 4.776330 | 2.313842 | -1.514017 |
| C | 5.356172 | 1.081385 | -1.282460 |

|   |           |           |           |   |           |           |           |
|---|-----------|-----------|-----------|---|-----------|-----------|-----------|
| O | -2.090442 | 0.907286  | 2.023608  | H | -2.779921 | 1.247238  | 5.272733  |
| C | -3.695523 | -0.134032 | 0.562449  | H | -1.195601 | 2.913666  | 4.286108  |
| C | -4.759802 | 0.889967  | 0.991803  | H | -0.140734 | 2.410252  | 2.065639  |
| H | -5.767188 | 0.472729  | 0.872835  | C | -2.022226 | -2.144947 | -0.839938 |
| H | -4.616046 | 1.168807  | 2.038746  | C | -1.158808 | -1.801430 | -2.003916 |
| H | -4.690595 | 1.798787  | 0.385919  | C | -1.194352 | -2.509642 | -3.228469 |
| C | -3.853625 | -0.469537 | -0.927246 | C | -0.295847 | -0.703934 | -1.817130 |
| H | -3.127172 | -1.224514 | -1.236530 | C | -0.336595 | -2.076923 | -4.246689 |
| H | -4.862340 | -0.856133 | -1.121305 | C | 0.532295  | -0.281808 | -2.854798 |
| H | -3.699167 | 0.418936  | -1.545718 | C | 0.509179  | -0.978933 | -4.067495 |
| C | -3.848865 | -1.421923 | 1.402573  | H | -0.360190 | -2.557328 | 0.661486  |
| H | -4.833902 | -1.874553 | 1.233826  | H | -0.334609 | -2.607017 | -5.195692 |
| H | -3.083344 | -2.158030 | 1.137969  | H | 1.192011  | 0.568875  | -2.728691 |
| H | -3.747787 | -1.197016 | 2.468535  | H | 1.158116  | -0.665321 | -4.882014 |

### C1

Energy = -2172.52845393 ZPE = -2171.865182 H =  
-2171.823014 G = -2171.937057

|   |           |           |           |
|---|-----------|-----------|-----------|
| C | -0.035035 | 2.666955  | -0.966277 |
| C | 0.397600  | 3.934164  | -1.378005 |
| C | -0.508611 | 4.897370  | -1.860517 |
| C | -1.863660 | 4.646741  | -1.963019 |
| C | -2.354758 | 3.381063  | -1.566201 |
| C | -1.435000 | 2.404169  | -1.076220 |
| N | -1.860987 | 1.164850  | -0.682689 |
| C | -3.149540 | 0.853481  | -0.746069 |
| C | -4.117724 | 1.764229  | -1.212083 |
| C | -3.723670 | 3.017350  | -1.621857 |
| N | 0.725738  | 1.672615  | -0.365991 |
| H | -0.118450 | 5.866256  | -2.159896 |
| H | -2.553770 | 5.395168  | -2.338653 |
| H | -4.449124 | 3.737763  | -1.988594 |
| H | -5.156618 | 1.456388  | -1.240370 |
| H | -3.438781 | -0.136151 | -0.424143 |
| C | 2.104156  | 1.709605  | -0.592179 |
| C | 3.037455  | 1.337262  | 0.526067  |
| C | 4.440718  | 1.253760  | 0.322225  |
| C | 2.531107  | 1.187963  | 1.825606  |
| C | 5.258331  | 1.048163  | 1.445023  |
| C | 3.358563  | 0.993161  | 2.925886  |
| C | 4.739563  | 0.932932  | 2.734161  |
| H | 1.462861  | 1.209476  | 1.955746  |
| H | 6.332943  | 0.979177  | 1.298083  |
| H | 2.929374  | 0.886595  | 3.917759  |
| H | 5.408719  | 0.783998  | 3.576815  |
| O | 2.578202  | 2.130937  | -1.656588 |
| H | 1.449096  | 4.181501  | -1.327486 |
| C | 5.116901  | 1.372353  | -1.024643 |
| H | 6.167947  | 1.079405  | -0.943837 |
| H | 4.632778  | 0.750391  | -1.780668 |
| H | 5.064802  | 2.396803  | -1.402614 |
| C | -2.278678 | -1.431792 | 1.515281  |
| C | -3.216911 | -2.348653 | 1.976345  |
| C | -3.834479 | -2.168848 | 3.236822  |
| C | -3.550311 | -1.084453 | 4.038775  |
| C | -2.610506 | -0.117554 | 3.597440  |
| C | -1.954944 | -0.312732 | 2.347201  |
| N | -1.041945 | 0.585616  | 1.864669  |
| C | -0.820486 | 1.706129  | 2.533393  |
| C | -1.426858 | 1.985060  | 3.776729  |
| C | -2.302049 | 1.067201  | 4.313995  |
| N | -1.574023 | -1.476071 | 0.301321  |
| H | -4.558715 | -2.907693 | 3.566928  |
| H | -4.043941 | -0.947434 | 4.995849  |

### Co

|   |          |           |           |
|---|----------|-----------|-----------|
| C | 1.454890 | -2.216780 | 0.417720  |
| O | 1.247482 | -0.991071 | 0.376170  |
| O | 0.502250 | -3.084553 | 0.656454  |
| C | 2.847492 | -2.784531 | 0.176469  |
| C | 3.389237 | -2.129230 | -1.111996 |
| H | 4.405436 | -2.487260 | -1.302490 |
| H | 2.764381 | -2.377818 | -1.975668 |
| H | 3.409977 | -1.044273 | -1.009890 |
| C | 3.729159 | -2.392566 | 1.381710  |
| H | 3.351391 | -2.838806 | 2.307716  |
| H | 4.747002 | -2.759634 | 1.217373  |
| H | 3.766150 | -1.311022 | 1.503303  |
| C | 2.803842 | -4.312754 | 0.022137  |
| H | 3.816180 | -4.682904 | -0.166240 |
| H | 2.424015 | -4.795662 | 0.926131  |
| H | 2.167451 | -4.609501 | -0.816453 |

### C1'

Energy = -1825.450386 ZPE = -1824.93664 H = -  
1824.903271 G = -1824.999459

|   |           |           |           |
|---|-----------|-----------|-----------|
| C | -0.243530 | -2.785879 | 0.315450  |
| C | -0.511411 | -4.106449 | 0.667158  |
| C | -0.060917 | -5.163180 | -0.159134 |
| C | 0.644796  | -4.941541 | -1.325218 |
| C | 0.931448  | -3.610348 | -1.725168 |
| C | 0.479848  | -2.549925 | -0.894760 |
| N | 0.710279  | -1.239836 | -1.227127 |
| C | 1.363729  | -0.926896 | -2.338065 |
| C | 1.845247  | -1.925226 | -3.208653 |
| C | 1.632345  | -3.253803 | -2.905643 |
| N | -0.591260 | -1.610495 | 0.965958  |
| H | -0.282774 | -6.182432 | 0.143482  |
| H | 0.981096  | -5.766586 | -1.944782 |
| H | 1.994468  | -4.036606 | -3.565517 |
| H | 2.375368  | -1.627764 | -4.105848 |
| H | 1.505226  | 0.128909  | -2.530643 |
| C | -1.496797 | -1.514206 | 1.977434  |
| C | -1.825372 | -0.066066 | 2.259759  |
| C | -3.158113 | 0.395668  | 2.193020  |
| C | -0.775954 | 0.845843  | 2.485861  |
| C | -3.380235 | 1.772428  | 2.302480  |
| C | -1.026315 | 2.219973  | 2.596947  |
| C | -2.332735 | 2.683285  | 2.485646  |

|    |           |           |           |    |           |           |           |
|----|-----------|-----------|-----------|----|-----------|-----------|-----------|
| H  | 0.229494  | 0.473840  | 2.647212  | C  | 2.407021  | -2.419046 | -0.579457 |
| H  | -4.399384 | 2.143644  | 2.232584  | C  | 3.489257  | -2.675071 | 0.292597  |
| H  | -0.203427 | 2.906057  | 2.770995  | C  | 2.645380  | -1.881081 | -1.851461 |
| H  | -2.547514 | 3.745201  | 2.557224  | C  | 4.777453  | -2.343442 | -0.145951 |
| O  | -2.041513 | -2.453272 | 2.573804  | C  | 3.937953  | -1.577042 | -2.278168 |
| H  | -1.067550 | -4.307685 | 1.571489  | C  | 5.009270  | -1.805532 | -1.414274 |
| C  | -4.314336 | -0.548098 | 1.968578  | H  | 1.797206  | -1.723822 | -2.510096 |
| H  | -5.267304 | -0.016009 | 2.024109  | H  | 5.617392  | -2.510195 | 0.523375  |
| H  | -4.244487 | -1.014087 | 0.980121  | H  | 4.104321  | -1.168788 | -3.270618 |
| H  | -4.309187 | -1.355795 | 2.703111  | H  | 6.023016  | -1.566138 | -1.722172 |
| C  | 1.998531  | 2.024445  | -0.259181 | O  | 0.810363  | -3.853131 | 0.433636  |
| C  | 2.698151  | 3.165285  | -0.653634 | H  | -0.666017 | -4.699129 | -1.104888 |
| C  | 4.030220  | 3.373731  | -0.226939 | C  | 3.301377  | -3.268991 | 1.668722  |
| C  | 4.695154  | 2.477040  | 0.584300  | H  | 4.216869  | -3.169723 | 2.258505  |
| C  | 4.023096  | 1.303958  | 1.014259  | H  | 2.483904  | -2.778979 | 2.205116  |
| C  | 2.679087  | 1.090044  | 0.594487  | H  | 3.037546  | -4.327574 | 1.603391  |
| N  | 1.976539  | -0.015941 | 0.985765  | C  | -1.031441 | 2.902787  | -0.136348 |
| C  | 2.545632  | -0.925057 | 1.761982  | C  | -1.672080 | 4.126678  | 0.043962  |
| C  | 3.874302  | -0.796707 | 2.218209  | C  | -1.376248 | 5.234020  | -0.783682 |
| C  | 4.604426  | 0.312760  | 1.846668  | C  | -0.438177 | 5.158509  | -1.790003 |
| N  | 0.706444  | 1.648607  | -0.599677 | C  | 0.235135  | 3.932035  | -2.019680 |
| H  | 4.539628  | 4.274448  | -0.557944 | C  | -0.082456 | 2.800623  | -1.208642 |
| H  | 5.719057  | 2.652053  | 0.899323  | N  | 0.507006  | 1.585898  | -1.424589 |
| H  | 5.628997  | 0.440282  | 2.184783  | C  | 1.434294  | 1.465760  | -2.364178 |
| H  | 4.298907  | -1.566419 | 2.852762  | C  | 1.835693  | 2.539580  | -3.184793 |
| H  | 1.927216  | -1.775432 | 2.032320  | C  | 1.225783  | 3.763262  | -3.020054 |
| C  | -0.186426 | 2.408805  | -1.322975 | N  | -1.138213 | 1.758253  | 0.666775  |
| C  | -1.456063 | 1.643306  | -1.538666 | H  | -1.898142 | 6.169228  | -0.602338 |
| C  | -2.550658 | 2.128750  | -2.288554 | H  | -0.204091 | 6.018235  | -2.410226 |
| C  | -1.485878 | 0.358013  | -0.961684 | H  | 1.495755  | 4.609409  | -3.645657 |
| C  | -3.646796 | 1.271625  | -2.463338 | H  | 2.604404  | 2.382453  | -3.932851 |
| C  | -2.574503 | -0.483845 | -1.178639 | H  | 1.884955  | 0.486550  | -2.469197 |
| C  | -3.658571 | -0.019126 | -1.930155 | C  | -2.251733 | 1.531845  | 1.446601  |
| H  | -4.500674 | 1.620705  | -3.038531 | C  | -2.160265 | 0.244612  | 2.214152  |
| H  | -2.587013 | -1.487019 | -0.764842 | C  | -2.912963 | 0.003049  | 3.393452  |
| H  | -4.518154 | -0.663306 | -2.098684 | C  | -1.336952 | -0.767213 | 1.732624  |
| O  | 0.025848  | 3.554261  | -1.743636 | C  | -2.774249 | -1.248048 | 4.010246  |
| H  | 2.205955  | 3.887582  | -1.287972 | C  | -1.210379 | -2.014393 | 2.316834  |
| C  | -2.577929 | 3.509003  | -2.901617 | C  | -1.948320 | -2.245187 | 3.486573  |
| H  | -3.524190 | 3.678034  | -3.423766 | H  | 0.198328  | 1.855065  | 1.554183  |
| H  | -2.450043 | 4.284012  | -2.140852 | H  | -3.332254 | -1.445444 | 4.921882  |
| H  | -1.753756 | 3.645585  | -3.607306 | H  | -0.583943 | -2.790966 | 1.889981  |
| Co | 0.076315  | -0.021153 | 0.074448  | H  | -1.877756 | -3.207745 | 3.987803  |
|    |           |           |           | O  | -3.250143 | 2.260562  | 1.517045  |
|    |           |           |           | H  | -2.398398 | 4.224861  | 0.837012  |
|    |           |           |           | C  | -3.835684 | 1.033802  | 4.001831  |
|    |           |           |           | H  | -4.156622 | 0.716479  | 4.998277  |
|    |           |           |           | H  | -3.351792 | 2.010899  | 4.078954  |
|    |           |           |           | H  | -4.721164 | 1.184104  | 3.378161  |
|    |           |           |           | Co | -0.215860 | -0.059950 | -0.246518 |
|    |           |           |           | C  | 1.976086  | 1.142823  | 1.489869  |
|    |           |           |           | O  | 1.604960  | 0.115310  | 0.893932  |
|    |           |           |           | O  | 1.142548  | 2.055412  | 1.918574  |
|    |           |           |           | C  | 3.457987  | 1.419847  | 1.724496  |
|    |           |           |           | C  | 4.032504  | 0.268935  | 2.575055  |
|    |           |           |           | H  | 5.107828  | 0.418621  | 2.713816  |
|    |           |           |           | H  | 3.562537  | 0.234856  | 3.563588  |
|    |           |           |           | H  | 3.876515  | -0.688164 | 2.079028  |
|    |           |           |           | C  | 4.122242  | 1.424839  | 0.328068  |
|    |           |           |           | H  | 3.721523  | 2.232019  | -0.295108 |
|    |           |           |           | H  | 5.200020  | 1.581342  | 0.437247  |
|    |           |           |           | H  | 3.956081  | 0.475879  | -0.184327 |
|    |           |           |           | C  | 3.679963  | 2.767179  | 2.426518  |
|    |           |           |           | H  | 4.753479  | 2.931491  | 2.562562  |

**C1-q**  
Energy = -2172.48535811 ZPE = -2171.827079 H =  
-2171.783038 G = -2171.904593

|   |           |           |           |
|---|-----------|-----------|-----------|
| C | -1.190561 | -2.619209 | -1.178162 |
| C | -1.427705 | -3.981719 | -1.376090 |
| C | -2.645828 | -4.445068 | -1.918989 |
| C | -3.662365 | -3.583083 | -2.271820 |
| C | -3.477898 | -2.189463 | -2.083505 |
| C | -2.248726 | -1.716070 | -1.536378 |
| N | -2.031489 | -0.387395 | -1.322535 |
| C | -2.970016 | 0.496265  | -1.638818 |
| C | -4.205189 | 0.118670  | -2.198934 |
| C | -4.457307 | -1.220267 | -2.413380 |
| N | -0.002591 | -2.030823 | -0.751339 |
| H | -2.774358 | -5.514755 | -2.057297 |
| H | -4.596342 | -3.947726 | -2.687494 |
| H | -5.404247 | -1.546899 | -2.834055 |
| H | -4.937017 | 0.880084  | -2.443619 |
| H | -2.746168 | 1.536419  | -1.431415 |
| C | 1.007772  | -2.830542 | -0.236194 |

|                                                |           |           |           |
|------------------------------------------------|-----------|-----------|-----------|
| H                                              | 3.276923  | 3.594128  | 1.835512  |
| H                                              | 3.201362  | 2.787900  | 3.409422  |
| <b>C1-q'</b>                                   |           |           |           |
| Energy = -1825.40074586 ZPE = -1824.891906 H = |           |           |           |
| -1824.856954 G = -1824.959815                  |           |           |           |
| C                                              | -2.498418 | -1.598556 | -0.580536 |
| C                                              | -3.427599 | -2.358090 | -1.293438 |
| C                                              | -4.744068 | -2.541779 | -0.812908 |
| C                                              | -5.172176 | -1.987767 | 0.374531  |
| C                                              | -4.266857 | -1.210907 | 1.142417  |
| C                                              | -2.933334 | -1.019605 | 0.669084  |
| N                                              | -2.028166 | -0.280938 | 1.380604  |
| C                                              | -2.385906 | 0.269833  | 2.529794  |
| C                                              | -3.682038 | 0.134715  | 3.070814  |
| C                                              | -4.615188 | -0.603131 | 2.375919  |
| N                                              | -1.187324 | -1.310318 | -0.940263 |
| H                                              | -5.431749 | -3.138585 | -1.405905 |
| H                                              | -6.185825 | -2.135444 | 0.734626  |
| H                                              | -5.623366 | -0.729662 | 2.760854  |
| H                                              | -3.922712 | 0.608621  | 4.016011  |
| H                                              | -1.621040 | 0.844150  | 3.045348  |
| C                                              | -0.508484 | -1.966343 | -1.921172 |
| C                                              | 0.911513  | -1.457150 | -2.060301 |
| C                                              | 2.011248  | -2.328893 | -1.911653 |
| C                                              | 1.128215  | -0.093159 | -2.305717 |
| C                                              | 3.299073  | -1.786195 | -1.983284 |
| C                                              | 2.422776  | 0.427490  | -2.387225 |
| C                                              | 3.512046  | -0.423816 | -2.214807 |
| H                                              | 0.271889  | 0.562360  | -2.428593 |
| H                                              | 4.153587  | -2.442955 | -1.841523 |
| H                                              | 2.571167  | 1.487762  | -2.568897 |
| H                                              | 4.525110  | -0.034394 | -2.257538 |
| O                                              | -0.918235 | -2.892142 | -2.641256 |
| H                                              | -3.119679 | -2.812356 | -2.223860 |
| C                                              | 1.812879  | -3.797831 | -1.627224 |
| H                                              | 2.772044  | -4.318310 | -1.562952 |
| H                                              | 1.291213  | -3.933064 | -0.673432 |
| H                                              | 1.199338  | -4.266716 | -2.400019 |
| C                                              | 0.982982  | 2.721404  | 0.293906  |
| C                                              | 1.796505  | 3.870405  | 0.483385  |
| C                                              | 1.342852  | 5.139414  | 0.105646  |
| C                                              | 0.096856  | 5.325130  | -0.477364 |
| C                                              | -0.763454 | 4.212558  | -0.699569 |
| C                                              | -0.329669 | 2.917573  | -0.310403 |
| N                                              | -1.092127 | 1.816709  | -0.497297 |
| C                                              | -2.284272 | 1.945099  | -1.071686 |
| C                                              | -2.798476 | 3.184315  | -1.495456 |
| C                                              | -2.037861 | 4.321541  | -1.304620 |
| N                                              | 1.257268  | 1.446870  | 0.622286  |
| H                                              | 1.987894  | 5.996309  | 0.271403  |
| H                                              | -0.233560 | 6.315575  | -0.774891 |
| H                                              | -2.401236 | 5.296573  | -1.615243 |
| H                                              | -3.776352 | 3.230151  | -1.961101 |
| H                                              | -2.852439 | 1.029548  | -1.200173 |
| C                                              | 2.538803  | 0.981099  | 1.027351  |
| C                                              | 2.522934  | -0.459680 | 1.386096  |
| C                                              | 3.717402  | -1.136679 | 1.764712  |
| C                                              | 1.268337  | -1.120841 | 1.334173  |
| C                                              | 3.603152  | -2.481181 | 2.125864  |
| C                                              | 1.212090  | -2.461745 | 1.742028  |
| C                                              | 2.366465  | -3.141281 | 2.126105  |
| H                                              | 4.497761  | -3.025309 | 2.418435  |
| H                                              | 0.261994  | -2.993182 | 1.715442  |

|                                                |           |           |           |
|------------------------------------------------|-----------|-----------|-----------|
| H                                              | 2.322400  | -4.190193 | 2.411939  |
| O                                              | 3.535209  | 1.704078  | 1.054574  |
| H                                              | 2.772766  | 3.744184  | 0.926027  |
| C                                              | 5.081656  | -0.490145 | 1.786464  |
| H                                              | 5.844717  | -1.218251 | 2.077548  |
| H                                              | 5.338890  | -0.081775 | 0.804648  |
| H                                              | 5.116481  | 0.354785  | 2.479928  |
| Co                                             | -0.163799 | -0.083939 | 0.322315  |
| <b>C1-t</b>                                    |           |           |           |
| Energy = -2172.51055608 ZPE = -2171.850222 H = |           |           |           |
| -2171.806732 G = -2171.926481                  |           |           |           |
| C                                              | -0.067790 | 2.870464  | 0.273263  |
| C                                              | -0.624909 | 4.141906  | 0.443344  |
| C                                              | 0.176217  | 5.271724  | 0.705666  |
| C                                              | 1.549925  | 5.187402  | 0.818836  |
| C                                              | 2.170324  | 3.923530  | 0.669782  |
| C                                              | 1.361529  | 2.776160  | 0.402975  |
| N                                              | 1.916080  | 1.543524  | 0.271620  |
| C                                              | 3.222791  | 1.374578  | 0.373518  |
| C                                              | 4.099802  | 2.453124  | 0.615397  |
| C                                              | 3.571273  | 3.716864  | 0.767081  |
| N                                              | -0.757603 | 1.721006  | -0.106787 |
| H                                              | -0.313660 | 6.235033  | 0.818073  |
| H                                              | 2.157569  | 6.064617  | 1.017370  |
| H                                              | 4.217109  | 4.568069  | 0.964147  |
| H                                              | 5.166770  | 2.272687  | 0.684376  |
| H                                              | 3.590327  | 0.358390  | 0.267230  |
| C                                              | -2.130621 | 1.687050  | 0.181659  |
| C                                              | -3.061290 | 1.106917  | -0.842879 |
| C                                              | -4.466857 | 1.077019  | -0.637374 |
| C                                              | -2.542193 | 0.628973  | -2.055904 |
| C                                              | -5.271312 | 0.562740  | -1.667198 |
| C                                              | -3.356069 | 0.117104  | -3.059179 |
| C                                              | -4.737408 | 0.085915  | -2.863233 |
| H                                              | -1.473313 | 0.638732  | -2.189333 |
| H                                              | -6.347531 | 0.534711  | -1.519204 |
| H                                              | -2.916464 | -0.251953 | -3.981160 |
| H                                              | -5.396164 | -0.306222 | -3.632908 |
| O                                              | -2.581543 | 2.159818  | 1.233024  |
| H                                              | -1.697522 | 4.267726  | 0.370326  |
| C                                              | -5.160884 | 1.564787  | 0.613450  |
| H                                              | -6.241339 | 1.418514  | 0.524072  |
| H                                              | -4.807397 | 1.037843  | 1.503206  |
| H                                              | -4.959267 | 2.623317  | 0.794719  |
| C                                              | 2.185717  | -1.914971 | -1.265497 |
| C                                              | 3.010860  | -2.998483 | -1.540718 |
| C                                              | 3.515059  | -3.203315 | -2.847581 |
| C                                              | 3.225464  | -2.341077 | -3.883721 |
| C                                              | 2.397513  | -1.214276 | -3.641962 |
| C                                              | 1.862122  | -1.024759 | -2.335289 |
| N                                              | 1.064012  | 0.044184  | -2.035103 |
| C                                              | 0.829756  | 0.966268  | -2.957174 |
| C                                              | 1.319961  | 0.860318  | -4.274902 |
| C                                              | 2.086038  | -0.233859 | -4.617704 |
| N                                              | 1.604727  | -1.585274 | -0.030632 |
| H                                              | 4.153058  | -4.063767 | -3.026387 |
| H                                              | 3.630041  | -2.500471 | -4.878313 |
| H                                              | 2.472120  | -0.347997 | -5.626592 |
| H                                              | 1.086427  | 1.636307  | -4.994838 |
| H                                              | 0.228605  | 1.811336  | -2.637610 |
| C                                              | 2.244023  | -1.837168 | 1.179341  |
| C                                              | 1.482884  | -1.186558 | 2.283216  |
| C                                              | 1.660806  | -1.490240 | 3.651582  |

|    |           |           |           |   |           |           |           |
|----|-----------|-----------|-----------|---|-----------|-----------|-----------|
| C  | 0.550366  | -0.219599 | 1.887018  | C | -2.845622 | 3.321553  | -1.720522 |
| C  | 0.862736  | -0.801261 | 4.573526  | H | -3.907009 | 3.576227  | -1.662228 |
| C  | -0.220695 | 0.478179  | 2.808208  | H | -2.378321 | 3.590651  | -0.768485 |
| C  | -0.060863 | 0.163158  | 4.163507  | H | -2.372519 | 3.935048  | -2.490896 |
| H  | 0.274413  | -2.702393 | 0.229538  | C | -0.177622 | -2.854873 | 0.330333  |
| H  | 0.968334  | -1.024489 | 5.631863  | C | -0.581632 | -4.148825 | 0.649621  |
| H  | -0.939031 | 1.227718  | 2.497965  | C | 0.164748  | -5.262104 | 0.194514  |
| H  | -0.665807 | 0.678093  | 4.905684  | C | 1.302549  | -5.123607 | -0.572866 |
| O  | 3.279325  | -2.492380 | 1.319355  | C | 1.746420  | -3.822773 | -0.926204 |
| H  | 3.276762  | -3.677661 | -0.743016 | C | 1.000111  | -2.700750 | -0.469676 |
| C  | 2.656953  | -2.519320 | 4.128680  | N | 1.362810  | -1.419968 | -0.778995 |
| H  | 2.557489  | -2.678713 | 5.205892  | C | 2.436015  | -1.200859 | -1.523995 |
| H  | 2.519843  | -3.474554 | 3.614183  | C | 3.237922  | -2.252880 | -2.013483 |
| H  | 3.681936  | -2.205328 | 3.912075  | C | 2.893727  | -3.554734 | -1.715498 |
| Co | 0.416291  | 0.059398  | -0.049168 | N | -0.765888 | -1.647272 | 0.695310  |
| C  | -1.551649 | -2.330620 | 0.397291  | H | -0.179759 | -6.255809 | 0.466083  |
| O  | -1.400963 | -1.223854 | -0.130272 | H | 1.862612  | -5.989097 | -0.912584 |
| O  | -0.552380 | -3.182100 | 0.536717  | H | 3.491508  | -4.384526 | -2.081735 |
| C  | -2.903404 | -2.761150 | 0.950630  | H | 4.107922  | -2.022741 | -2.617920 |
| C  | -3.269536 | -1.722919 | 2.037894  | H | 2.667137  | -0.163513 | -1.740742 |
| H  | -4.259781 | -1.952593 | 2.443372  | C | -2.020186 | -1.517745 | 1.273102  |
| H  | -2.546812 | -1.738738 | 2.860244  | C | -2.317960 | -0.078201 | 1.539002  |
| H  | -3.282957 | -0.715401 | 1.617595  | C | -3.473073 | 0.385949  | 2.204302  |
| C  | -3.925263 | -2.687867 | -0.204047 | C | -1.330546 | 0.819208  | 1.106846  |
| H  | -3.685917 | -3.414017 | -0.988361 | C | -3.569368 | 1.765472  | 2.440107  |
| H  | -4.924517 | -2.918376 | 0.178664  | C | -1.432528 | 2.181293  | 1.365443  |
| H  | -3.941201 | -1.690242 | -0.645140 | C | -2.564317 | 2.649861  | 2.043228  |
| C  | -2.858453 | -4.173860 | 1.548832  | H | -4.446333 | 2.150219  | 2.954034  |
| H  | -3.847427 | -4.435189 | 1.937930  | H | -0.660654 | 2.869108  | 1.036617  |
| H  | -2.579345 | -4.916400 | 0.795819  | H | -2.667526 | 3.711277  | 2.253830  |
| H  | -2.138744 | -4.235541 | 2.369748  | O | -2.769127 | -2.458730 | 1.547188  |

### C1-e'

Energy = -1825.44490374 ZPE = -1824.933217 H =  
-1824.898997 G = -1824.999581

|   |           |           |           |
|---|-----------|-----------|-----------|
| C | 1.885423  | 2.077257  | -0.458835 |
| C | 2.591778  | 3.113600  | -1.067783 |
| C | 3.814936  | 3.574542  | -0.527638 |
| C | 4.362515  | 3.031703  | 0.614913  |
| C | 3.682933  | 1.975197  | 1.273193  |
| C | 2.450087  | 1.503810  | 0.735129  |
| N | 1.763214  | 0.489238  | 1.332929  |
| C | 2.226298  | -0.078527 | 2.433653  |
| C | 3.435870  | 0.327507  | 3.035997  |
| C | 4.157303  | 1.348061  | 2.454309  |
| N | 0.681552  | 1.507643  | -0.879056 |
| H | 4.329814  | 4.383151  | -1.038413 |
| H | 5.300866  | 3.397143  | 1.020394  |
| H | 5.093672  | 1.683941  | 2.890784  |
| H | 3.778752  | -0.166077 | 3.938279  |
| H | 1.625807  | -0.883552 | 2.847248  |
| C | -0.139319 | 2.078015  | -1.819424 |
| C | -1.379902 | 1.263306  | -2.091941 |
| C | -2.661371 | 1.852740  | -2.015423 |
| C | -1.252041 | -0.099030 | -2.404470 |
| C | -3.775833 | 1.025970  | -2.197080 |
| C | -2.378061 | -0.903296 | -2.595044 |
| C | -3.645898 | -0.338852 | -2.473516 |
| H | -0.262781 | -0.527987 | -2.520554 |
| H | -4.768666 | 1.460786  | -2.115545 |
| H | -2.258305 | -1.956201 | -2.831235 |
| H | -4.533885 | -0.950288 | -2.604641 |
| O | 0.059151  | 3.148714  | -2.408084 |
| H | 2.188369  | 3.569363  | -1.959312 |

|    |           |           |           |
|----|-----------|-----------|-----------|
| C  | -2.845622 | 3.321553  | -1.720522 |
| H  | -3.907009 | 3.576227  | -1.662228 |
| H  | -2.378321 | 3.590651  | -0.768485 |
| H  | -2.372519 | 3.935048  | -2.490896 |
| C  | -0.177622 | -2.854873 | 0.330333  |
| C  | -0.581632 | -4.148825 | 0.649621  |
| C  | 0.164748  | -5.262104 | 0.194514  |
| C  | 1.302549  | -5.123607 | -0.572866 |
| C  | 1.746420  | -3.822773 | -0.926204 |
| C  | 1.000111  | -2.700750 | -0.469676 |
| N  | 1.362810  | -1.419968 | -0.778995 |
| C  | 2.436015  | -1.200859 | -1.523995 |
| C  | 3.237922  | -2.252880 | -2.013483 |
| C  | 2.893727  | -3.554734 | -1.715498 |
| N  | -0.765888 | -1.647272 | 0.695310  |
| H  | -0.179759 | -6.255809 | 0.466083  |
| H  | 1.862612  | -5.989097 | -0.912584 |
| H  | 3.491508  | -4.384526 | -2.081735 |
| H  | 4.107922  | -2.022741 | -2.617920 |
| H  | 2.667137  | -0.163513 | -1.740742 |
| C  | -2.020186 | -1.517745 | 1.273102  |
| C  | -2.317960 | -0.078201 | 1.539002  |
| C  | -3.473073 | 0.385949  | 2.204302  |
| C  | -1.330546 | 0.819208  | 1.106846  |
| C  | -3.569368 | 1.765472  | 2.440107  |
| C  | -1.432528 | 2.181293  | 1.365443  |
| C  | -2.564317 | 2.649861  | 2.043228  |
| H  | -4.446333 | 2.150219  | 2.954034  |
| H  | -0.660654 | 2.869108  | 1.036617  |
| H  | -2.667526 | 3.711277  | 2.253830  |
| O  | -2.769127 | -2.458730 | 1.547188  |
| H  | -1.470917 | -4.294023 | 1.244759  |
| C  | -4.577932 | -0.535324 | 2.661807  |
| H  | -5.371729 | 0.032664  | 3.154867  |
| H  | -5.007686 | -1.084671 | 1.819291  |
| H  | -4.201483 | -1.294218 | 3.353360  |
| Co | 0.105057  | -0.050008 | 0.151407  |

### C2

Energy = -2172.497545 ZPE = -2171.8355 H = -  
2171.792391 G = -2171.909814

|   |           |           |           |
|---|-----------|-----------|-----------|
| C | -1.474034 | 2.734800  | 0.199769  |
| C | -2.067507 | 3.977697  | -0.004069 |
| C | -1.742975 | 5.061896  | 0.843921  |
| C | -0.849794 | 4.937461  | 1.888892  |
| C | -0.231470 | 3.684082  | 2.133367  |
| C | -0.555823 | 2.593749  | 1.280650  |
| N | -0.001569 | 1.353230  | 1.460733  |
| C | 0.868755  | 1.149713  | 2.438576  |
| C | 1.235721  | 2.179455  | 3.329172  |
| C | 0.692860  | 3.436558  | 3.178832  |
| N | -1.658089 | 1.556436  | -0.502479 |
| H | -2.217084 | 6.020994  | 0.657359  |
| H | -0.612936 | 5.779759  | 2.530795  |
| H | 0.966412  | 4.244518  | 3.850865  |
| H | 1.948915  | 1.958972  | 4.114830  |
| H | 1.319717  | 0.169053  | 2.523798  |
| C | -2.689096 | 1.302664  | -1.352192 |
| C | -2.738949 | -0.153500 | -1.723669 |
| C | -3.926398 | -0.893169 | -1.542420 |
| C | -1.552233 | -0.786811 | -2.146657 |
| C | -3.877093 | -2.271363 | -1.775737 |
| C | -1.550577 | -2.167420 | -2.402235 |
| C | -2.707226 | -2.910553 | -2.201193 |

|    |           |           |           |   |           |           |           |
|----|-----------|-----------|-----------|---|-----------|-----------|-----------|
| H  | -0.673246 | -0.194092 | -2.427580 | C | -1.987347 | 2.488767  | -1.074175 |
| H  | -4.775494 | -2.861279 | -1.614498 | C | -2.331052 | 3.427982  | -2.048675 |
| H  | -0.649338 | -2.654956 | -2.757480 | C | -2.742281 | 4.732439  | -1.692879 |
| H  | -2.710152 | -3.981662 | -2.377836 | C | -2.827920 | 5.139590  | -0.378215 |
| O  | -3.524939 | 2.125820  | -1.748582 | C | -2.494158 | 4.223985  | 0.653027  |
| H  | -2.774263 | 4.098283  | -0.811901 | C | -2.077165 | 2.902617  | 0.307178  |
| C  | -5.201328 | -0.246017 | -1.060686 | N | -1.748398 | 1.986814  | 1.266528  |
| H  | -5.047569 | 0.224091  | -0.083871 | C | -1.815725 | 2.322328  | 2.543967  |
| H  | -5.524714 | 0.541631  | -1.744510 | C | -2.216647 | 3.604417  | 2.978741  |
| H  | -5.999340 | -0.985908 | -0.960272 | C | -2.552540 | 4.548341  | 2.033051  |
| C  | 1.922510  | -1.724754 | -0.163375 | N | -1.551937 | 1.185880  | -1.269932 |
| C  | 2.069702  | -1.911423 | -1.516964 | H | -2.995460 | 5.428999  | -2.487827 |
| C  | 3.353743  | -2.130185 | -2.068431 | H | -3.145798 | 6.144569  | -0.116851 |
| C  | 4.476249  | -2.151050 | -1.268886 | H | -2.864425 | 5.546520  | 2.328665  |
| C  | 4.355527  | -1.939861 | 0.129286  | H | -2.252630 | 3.826638  | 4.039736  |
| C  | 3.060816  | -1.728814 | 0.692080  | H | -1.537509 | 1.551149  | 3.257623  |
| N  | 2.860479  | -1.514719 | 2.023806  | C | -1.712462 | 0.504400  | -2.439663 |
| C  | 3.914452  | -1.498827 | 2.820190  | C | -1.234511 | -0.927001 | -2.326845 |
| C  | 5.240316  | -1.697487 | 2.364364  | C | -2.116105 | -2.001615 | -2.575224 |
| C  | 5.457157  | -1.917455 | 1.022648  | C | 0.085746  | -1.177750 | -1.922900 |
| N  | 0.651231  | -1.494245 | 0.467293  | C | -1.639816 | -3.303229 | -2.384664 |
| H  | 3.445422  | -2.270553 | -3.140385 | C | 0.543821  | -2.488674 | -1.748797 |
| H  | 5.461201  | -2.314006 | -1.696024 | C | -0.326330 | -3.553050 | -1.971503 |
| H  | 6.460140  | -2.071651 | 0.635061  | H | 0.796470  | -0.365550 | -1.769995 |
| H  | 6.060887  | -1.671682 | 3.072826  | H | -2.317696 | -4.138120 | -2.547554 |
| H  | 3.723578  | -1.319505 | 3.875992  | H | 1.570845  | -2.628201 | -1.422792 |
| C  | -0.328725 | -2.622409 | 0.461952  | H | 0.006453  | -4.577629 | -1.825740 |
| C  | -1.583793 | -2.163361 | 1.071100  | O | -2.215527 | 0.925499  | -3.496188 |
| C  | -2.538684 | -3.052125 | 1.622864  | H | -2.283849 | 3.135991  | -3.087629 |
| C  | -1.771205 | -0.766678 | 1.076591  | C | -3.553145 | -1.762916 | -2.972479 |
| C  | -3.644942 | -2.479891 | 2.254935  | H | -4.085828 | -1.239108 | -2.170540 |
| C  | -2.884183 | -0.230822 | 1.722440  | H | -3.617235 | -1.135800 | -3.864647 |
| C  | -3.808064 | -1.090474 | 2.320610  | H | -4.072238 | -2.707528 | -3.158056 |
| H  | -4.390793 | -3.128843 | 2.705304  | C | 1.432838  | -0.928038 | 1.861765  |
| H  | -3.045290 | 0.842502  | 1.738586  | C | 2.327547  | -1.706469 | 2.645865  |
| H  | -4.677162 | -0.680295 | 2.828675  | C | 3.562921  | -1.188526 | 3.041993  |
| O  | -0.031058 | -3.708552 | 0.019532  | C | 3.969300  | 0.088416  | 2.675707  |
| H  | 1.211821  | -1.836876 | -2.168665 | C | 3.126245  | 0.910356  | 1.877204  |
| C  | -2.386968 | -4.548909 | 1.536279  | C | 1.861673  | 0.410766  | 1.474024  |
| H  | -3.180812 | -5.052249 | 2.093845  | N | 1.005067  | 1.136514  | 0.726391  |
| H  | -2.426949 | -4.877180 | 0.492801  | C | 1.368974  | 2.348977  | 0.324363  |
| H  | -1.418642 | -4.879562 | 1.924142  | C | 2.601259  | 2.930618  | 0.667848  |
| Co | -0.467621 | 0.172524  | 0.028547  | C | 3.480867  | 2.210778  | 1.451934  |
| C  | 1.502121  | 1.176314  | -2.067362 | N | 0.198271  | -1.250776 | 1.455926  |
| O  | 1.004390  | 0.644624  | -3.076397 | H | 4.220238  | -1.803722 | 3.648579  |
| O  | 1.074715  | 1.056654  | -0.859888 | H | 4.936448  | 0.470632  | 2.987511  |
| C  | 2.740859  | 2.101058  | -2.187712 | H | 4.442702  | 2.624724  | 1.739946  |
| C  | 3.807829  | 1.660267  | -1.166983 | H | 2.844998  | 3.925459  | 0.312573  |
| H  | 4.681062  | 2.320815  | -1.220932 | H | 0.648976  | 2.883169  | -0.287168 |
| H  | 3.406257  | 1.691478  | -0.151504 | C | -0.383400 | -2.536354 | 1.575697  |
| H  | 4.142277  | 0.637439  | -1.366455 | C | -1.837294 | -2.517276 | 1.265420  |
| C  | 3.315627  | 2.043178  | -3.608724 | C | -2.628641 | -3.695504 | 1.365614  |
| H  | 2.568180  | 2.344222  | -4.347486 | C | -2.385784 | -1.269623 | 0.873675  |
| H  | 4.181647  | 2.709233  | -3.696426 | C | -3.995507 | -3.575026 | 1.098955  |
| H  | 3.636656  | 1.026646  | -3.857186 | C | -3.768208 | -1.207510 | 0.644910  |
| C  | 2.271245  | 3.534080  | -1.856621 | C | -4.568285 | -2.345244 | 0.750483  |
| H  | 3.112734  | 4.234777  | -1.906306 | H | -4.625969 | -4.458359 | 1.169455  |
| H  | 1.508072  | 3.872153  | -2.567062 | H | -4.221365 | -0.264100 | 0.341977  |
| H  | 1.842760  | 3.572639  | -0.850869 | H | -5.636643 | -2.292124 | 0.548859  |
| H  | 0.876048  | -1.358016 | 1.461193  | O | 0.260492  | -3.539640 | 1.890709  |
|    |           |           |           | H | 2.029771  | -2.704230 | 2.931684  |
|    |           |           |           | C | -2.074982 | -5.052156 | 1.732100  |
|    |           |           |           | H | -2.873205 | -5.800917 | 1.745043  |
|    |           |           |           | H | -1.305817 | -5.367297 | 1.020669  |

**C2-q'**  
Energy = -2171.97918803 ZPE = -2171.335433 H =  
-2171.290804 G = -2171.415638

|    |           |           |           |   |           |           |           |
|----|-----------|-----------|-----------|---|-----------|-----------|-----------|
| H  | -1.586458 | -5.038602 | 2.710604  | C | -3.309963 | -2.625516 | 0.672933  |
| Co | -0.970201 | 0.144200  | 0.378486  | N | 0.007763  | 0.661746  | 1.670240  |
| C  | 3.680753  | -0.299903 | -1.255777 | H | -3.679700 | 0.062958  | 4.431558  |
| O  | 3.477025  | -1.369695 | -0.612755 | H | -4.538276 | -1.758775 | 2.987279  |
| O  | 2.812646  | 0.478687  | -1.734134 | H | -4.220313 | -3.181183 | 0.879936  |
| C  | 5.187542  | 0.049168  | -1.544031 | H | -2.854596 | -3.664747 | -1.154737 |
| C  | 5.348545  | 1.520118  | -1.950853 | H | -0.775438 | -2.314263 | -1.567115 |
| H  | 6.393223  | 1.744207  | -2.204480 | C | 0.685224  | 1.707674  | 2.242376  |
| H  | 4.718178  | 1.753343  | -2.811940 | C | 2.004346  | 1.896400  | 1.558877  |
| H  | 5.045406  | 2.183844  | -1.134064 | C | 2.965707  | 2.853272  | 1.955807  |
| C  | 6.052739  | -0.248856 | -0.310094 | C | 2.261270  | 1.001568  | 0.502255  |
| H  | 5.893289  | -1.276299 | 0.023513  | C | 4.198475  | 2.849198  | 1.288432  |
| H  | 7.118647  | -0.104809 | -0.530426 | C | 3.510357  | 0.996740  | -0.116538 |
| H  | 5.789236  | 0.414241  | 0.521030  | C | 4.477907  | 1.925352  | 0.278147  |
| C  | 5.629863  | -0.863857 | -2.706648 | H | 4.955810  | 3.574489  | 1.576299  |
| H  | 6.683272  | -0.695147 | -2.965668 | H | 3.727818  | 0.287602  | -0.909354 |
| H  | 5.505998  | -1.916471 | -2.432516 | H | 5.451457  | 1.936120  | -0.206775 |
| H  | 5.027319  | -0.673616 | -3.602703 | O | 0.283397  | 2.384228  | 3.202458  |

### C2'

Energy = -2172.02837793 ZPE = -2171.379883 H =  
-2171.336824 G = -2171.454192

|   |           |           |           |
|---|-----------|-----------|-----------|
| C | 2.065601  | -2.038751 | -1.417001 |
| C | 2.619246  | -2.864182 | -2.393562 |
| C | 3.243325  | -4.077560 | -2.020951 |
| C | 3.336873  | -4.488638 | -0.705242 |
| C | 2.796788  | -3.671226 | 0.321578  |
| C | 2.165490  | -2.454227 | -0.052157 |
| N | 1.633043  | -1.609647 | 0.885488  |
| C | 1.696892  | -1.906451 | 2.175176  |
| C | 2.306574  | -3.096239 | 2.623794  |
| C | 2.848922  | -3.972065 | 1.707147  |
| N | 1.421230  | -0.824201 | -1.554287 |
| H | 3.661418  | -4.702870 | -2.804735 |
| H | 3.821516  | -5.423046 | -0.440992 |
| H | 3.321867  | -4.893630 | 2.033812  |
| H | 2.336884  | -3.301416 | 3.687674  |
| H | 1.252816  | -1.190518 | 2.854712  |
| C | 1.454774  | -0.027570 | -2.657314 |
| C | 0.922808  | 1.339536  | -2.306822 |
| C | 1.693029  | 2.497305  | -2.549412 |
| C | -0.292886 | 1.430575  | -1.595311 |
| C | 1.239512  | 3.705977  | -2.010313 |
| C | -0.732088 | 2.662813  | -1.084967 |
| C | 0.053356  | 3.794523  | -1.269677 |
| H | -1.014272 | 0.611716  | -1.573631 |
| H | 1.835666  | 4.601779  | -2.168535 |
| H | -1.702088 | 2.680848  | -0.591889 |
| H | -0.259238 | 4.755716  | -0.870597 |
| O | 1.909946  | -0.327491 | -3.770731 |
| H | 2.565918  | -2.560534 | -3.429445 |
| C | 2.993329  | 2.447796  | -3.315875 |
| H | 3.753100  | 1.896008  | -2.751854 |
| H | 2.869844  | 1.933485  | -4.270710 |
| H | 3.376068  | 3.456099  | -3.495862 |
| C | -1.195966 | 0.131612  | 2.102454  |
| C | -1.933332 | 0.464879  | 3.238383  |
| C | -3.131639 | -0.223684 | 3.538024  |
| C | -3.617482 | -1.239493 | 2.740295  |
| C | -2.904047 | -1.603815 | 1.568681  |
| C | -1.703769 | -0.909646 | 1.255924  |
| N | -0.975728 | -1.202128 | 0.137645  |
| C | -1.389760 | -2.146094 | -0.688968 |
| C | -2.558313 | -2.897323 | -0.448514 |

|    |           |           |           |
|----|-----------|-----------|-----------|
| C  | -3.309963 | -2.625516 | 0.672933  |
| N  | 0.007763  | 0.661746  | 1.670240  |
| H  | -3.679700 | 0.062958  | 4.431558  |
| H  | -4.538276 | -1.758775 | 2.987279  |
| H  | -4.220313 | -3.181183 | 0.879936  |
| H  | -2.854596 | -3.664747 | -1.154737 |
| H  | -0.775438 | -2.314263 | -1.567115 |
| C  | 0.685224  | 1.707674  | 2.242376  |
| C  | 2.004346  | 1.896400  | 1.558877  |
| C  | 2.965707  | 2.853272  | 1.955807  |
| C  | 2.261270  | 1.001568  | 0.502255  |
| C  | 4.198475  | 2.849198  | 1.288432  |
| C  | 3.510357  | 0.996740  | -0.116538 |
| C  | 4.477907  | 1.925352  | 0.278147  |
| H  | 4.955810  | 3.574489  | 1.576299  |
| H  | 3.727818  | 0.287602  | -0.909354 |
| H  | 5.451457  | 1.936120  | -0.206775 |
| O  | 0.283397  | 2.384228  | 3.202458  |
| H  | -1.576082 | 1.255799  | 3.881545  |
| C  | 2.718535  | 3.857348  | 3.057577  |
| H  | 3.580951  | 4.521064  | 3.172311  |
| H  | 1.830709  | 4.461887  | 2.852276  |
| H  | 2.524197  | 3.360039  | 4.012039  |
| Co | 0.759440  | -0.118130 | 0.109308  |
| C  | -3.921070 | 0.758992  | -1.036933 |
| O  | -3.654311 | 1.691957  | -0.226412 |
| O  | -3.111678 | 0.134687  | -1.776589 |
| C  | -5.443091 | 0.386300  | -1.161114 |
| C  | -5.642436 | -0.892516 | -1.984212 |
| H  | -6.709832 | -1.131794 | -2.082949 |
| H  | -5.215389 | -0.782206 | -2.984506 |
| H  | -5.141005 | -1.740462 | -1.507731 |
| C  | -6.043273 | 0.203993  | 0.243233  |
| H  | -5.852681 | 1.093093  | 0.848791  |
| H  | -7.126777 | 0.032881  | 0.191930  |
| H  | -5.589039 | -0.650413 | 0.755731  |
| C  | -6.139701 | 1.572618  | -1.857600 |
| H  | -7.221056 | 1.403943  | -1.945698 |
| H  | -5.975194 | 2.491766  | -1.287247 |
| H  | -5.740086 | 1.723776  | -2.867917 |

### C2-t'

Energy = -2172.02159241 ZPE = -2171.374936 H =  
-2171.330992 G = -2171.454977

|   |           |           |           |
|---|-----------|-----------|-----------|
| C | -2.023096 | 2.117098  | -1.349018 |
| C | -2.432372 | 2.901958  | -2.427402 |
| C | -2.847223 | 4.240447  | -2.237939 |
| C | -2.871865 | 4.832345  | -0.993148 |
| C | -2.464550 | 4.078996  | 0.137072  |
| C | -2.042276 | 2.729459  | -0.045086 |
| N | -1.635804 | 1.971512  | 1.011325  |
| C | -1.628729 | 2.470436  | 2.234865  |
| C | -2.035926 | 3.793892  | 2.507945  |
| C | -2.448439 | 4.590064  | 1.461001  |
| N | -1.575719 | 0.794898  | -1.382394 |
| H | -3.154268 | 4.811025  | -3.109948 |
| H | -3.195400 | 5.860362  | -0.861948 |
| H | -2.764072 | 5.615071  | 1.634675  |
| H | -2.014657 | 4.163766  | 3.526943  |
| H | -1.281296 | 1.806541  | 3.021454  |
| C | -1.751990 | -0.033397 | -2.466461 |
| C | -1.196308 | -1.416237 | -2.254372 |
| C | -1.995014 | -2.555911 | -2.502032 |
| C | 0.114365  | -1.565847 | -1.774397 |



|    |           |           |           |                         |                  |           |           |
|----|-----------|-----------|-----------|-------------------------|------------------|-----------|-----------|
| C  | -1.460585 | -3.810742 | -2.188658 | Energy = -1680.92852448 | ZPE = -1680.4037 | H = -     |           |
| C  | 0.634500  | -2.831318 | -1.484580 | 1680.370662             | G = -1680.467268 |           |           |
| C  | -0.167279 | -3.954792 | -1.673279 | C                       | 2.196213         | 1.549423  | -0.709715 |
| H  | 0.792035  | -0.719417 | -1.677098 | C                       | 3.159285         | 2.539375  | -0.611542 |
| H  | -2.074255 | -4.694347 | -2.348492 | C                       | 4.422779         | 2.371083  | -1.225714 |
| H  | 1.656171  | -2.883294 | -1.113635 | C                       | 4.727830         | 1.234194  | -1.940024 |
| H  | 0.209833  | -4.947194 | -1.439344 | C                       | 3.766462         | 0.195958  | -2.054637 |
| O  | -2.322687 | 0.272402  | -3.523087 | C                       | 2.489787         | 0.342359  | -1.429227 |
| H  | -2.435827 | 2.469735  | -3.416428 | N                       | 1.542913         | -0.637413 | -1.473850 |
| C  | -3.394826 | -2.451930 | -3.060281 | C                       | 1.813275         | -1.749512 | -2.133862 |
| H  | -4.025716 | -1.814308 | -2.433822 | C                       | 3.038548         | -1.986566 | -2.799498 |
| H  | -3.387045 | -2.002973 | -4.056566 | C                       | 4.011258         | -1.013956 | -2.754409 |
| H  | -3.862740 | -3.438604 | -3.117940 | N                       | 0.930866         | 1.625008  | -0.114781 |
| C  | 1.261131  | -0.144976 | 2.143170  | H                       | 5.156418         | 3.166012  | -1.131794 |
| C  | 2.038329  | -0.469952 | 3.251262  | H                       | 5.696545         | 1.113577  | -2.415793 |
| C  | 3.245819  | 0.224905  | 3.501092  | H                       | 4.970360         | -1.157824 | -3.244221 |
| C  | 3.698853  | 1.232067  | 2.674830  | H                       | 3.196020         | -2.922606 | -3.324176 |
| C  | 2.941822  | 1.584592  | 1.526710  | H                       | 1.030723         | -2.505937 | -2.140710 |
| C  | 1.728652  | 0.891145  | 1.273504  | C                       | 0.605285         | 2.265443  | 1.050502  |
| N  | 0.950171  | 1.171403  | 0.187614  | C                       | -0.650571        | 1.715659  | 1.681343  |
| C  | 1.339706  | 2.090888  | -0.677586 | C                       | -1.820500        | 2.495815  | 1.705598  |
| C  | 2.521876  | 2.838607  | -0.499421 | C                       | -0.624892        | 0.413106  | 2.225561  |
| C  | 3.315306  | 2.588957  | 0.598098  | C                       | -2.976629        | 1.945805  | 2.269882  |
| N  | 0.043172  | -0.693695 | 1.749571  | C                       | -1.799438        | -0.098969 | 2.797851  |
| H  | 3.827046  | -0.052449 | 4.375952  | C                       | -2.967633        | 0.659436  | 2.810289  |
| H  | 4.627927  | 1.754167  | 2.881379  | H                       | -3.891676        | 2.531567  | 2.281581  |
| H  | 4.234744  | 3.144789  | 0.758353  | H                       | -1.791181        | -1.096560 | 3.223661  |
| H  | 2.793733  | 3.587926  | -1.234084 | H                       | -3.872435        | 0.249245  | 3.249016  |
| H  | 0.692432  | 2.250132  | -1.532699 | O                       | 1.270774         | 3.162797  | 1.567131  |
| C  | -0.536375 | -1.827430 | 2.295769  | H                       | 2.934844         | 3.437884  | -0.054056 |
| C  | -1.895296 | -2.033839 | 1.711940  | C                       | -1.842442        | 3.873124  | 1.084866  |
| C  | -2.785708 | -3.053545 | 2.113330  | H                       | -0.995909        | 4.473935  | 1.426787  |
| C  | -2.269405 | -1.084685 | 0.748050  | H                       | -1.772406        | 3.806509  | -0.007559 |
| C  | -4.064465 | -3.054088 | 1.538258  | H                       | -2.768586        | 4.399902  | 1.326974  |
| C  | -3.553237 | -1.086267 | 0.211645  | C                       | -2.196174        | -1.549996 | -0.708159 |
| C  | -4.452083 | -2.079270 | 0.615729  | C                       | -3.159059        | -2.540103 | -0.609128 |
| H  | -4.772144 | -3.826130 | 1.829536  | C                       | -4.422667        | -2.372586 | -1.223357 |
| H  | -3.848571 | -0.338326 | -0.516401 | C                       | -4.727939        | -1.236312 | -1.938584 |
| H  | -5.457567 | -2.099334 | 0.202525  | C                       | -3.766763        | -0.197958 | -2.054019 |
| O  | -0.019362 | -2.537080 | 3.163481  | C                       | -2.490049        | -0.343530 | -1.428496 |
| H  | 1.714123  | -1.259003 | 3.913772  | N                       | -1.543438        | 0.636395  | -1.473969 |
| C  | -2.412807 | -4.110906 | 3.124558  | C                       | -1.814062        | 1.747850  | -2.134863 |
| H  | -3.238402 | -4.814022 | 3.267752  | C                       | -3.039389        | 1.984126  | -2.800638 |
| H  | -1.525442 | -4.666298 | 2.808029  | C                       | -4.011882        | 1.011346  | -2.754763 |
| H  | -2.156552 | -3.663827 | 4.089371  | N                       | -0.930740        | -1.625087 | -0.113393 |
| Co | -0.837504 | 0.138500  | 0.299297  | H                       | -5.156119        | -3.167618 | -1.128804 |
| C  | 3.791288  | -0.877401 | -1.183075 | H                       | -5.696678        | -1.116281 | -2.414466 |
| O  | 3.524181  | -1.858195 | -0.429608 | H                       | -4.971026        | 1.154567  | -3.244708 |
| O  | 2.978873  | -0.195199 | -1.864356 | H                       | -3.197088        | 2.919717  | -3.326043 |
| C  | 5.317704  | -0.522002 | -1.309325 | H                       | -1.031682        | 2.504450  | -2.142388 |
| C  | 5.529750  | 0.788080  | -2.078117 | C                       | -0.604985        | -2.264533 | 1.052413  |
| H  | 6.600143  | 1.011097  | -2.182998 | C                       | 0.650884         | -1.714151 | 1.682755  |
| H  | 5.086078  | 0.729505  | -3.075661 | C                       | 1.820881         | -2.494191 | 1.707697  |
| H  | 5.052520  | 1.624318  | -1.558272 | C                       | 0.625066         | -0.411179 | 2.225933  |
| C  | 5.935466  | -0.411791 | 0.095004  | C                       | 2.976954         | -1.943582 | 2.271627  |
| H  | 5.736682  | -1.323784 | 0.662936  | C                       | 1.799488         | 0.101491  | 2.797845  |
| H  | 7.021181  | -0.256489 | 0.039780  | C                       | 2.967762         | -0.656751 | 2.810989  |
| H  | 5.501706  | 0.426781  | 0.649789  | H                       | 3.892063         | -2.529267 | 2.283853  |
| C  | 5.988297  | -1.686692 | -2.065209 | H                       | 1.791108         | 1.099405  | 3.222841  |
| H  | 7.071861  | -1.532978 | -2.154399 | H                       | 3.872503         | -0.246151 | 3.249460  |
| H  | 5.810785  | -2.627689 | -1.536249 | O                       | -1.270337        | -3.161553 | 1.569836  |
| H  | 5.578731  | -1.784007 | -3.078200 | H                       | -2.934341        | -3.438144 | -0.050961 |
|    |           |           |           | C                       | 1.843103         | -3.871950 | 1.087897  |
|    |           |           |           | H                       | 0.995730         | -4.472126 | 1.428840  |

di-BQNH

|   |           |           |           |
|---|-----------|-----------|-----------|
| H | 1.774857  | -3.805903 | -0.004687 |
| H | 2.768600  | -4.399033 | 1.331814  |
| H | -0.224622 | -0.986204 | -0.485900 |
| H | 0.224560  | 0.986015  | -0.486823 |

**5-q**

Energy = -2171.32653618 ZPE = -2170.689795 H =  
-2170.646802 G = -2170.766018

|    |           |           |           |
|----|-----------|-----------|-----------|
| Co | -0.009867 | 0.670717  | -0.197200 |
| O  | -0.787400 | -2.256547 | -3.136459 |
| O  | 0.542800  | 2.444337  | 0.982999  |
| O  | 0.201913  | -0.961936 | 3.486865  |
| O  | 0.012983  | 2.673524  | -1.153168 |
| N  | 2.090607  | 0.628846  | -0.698123 |
| N  | -0.972355 | -0.640996 | -1.458237 |
| N  | 0.852373  | -0.588481 | 1.304099  |
| N  | -2.026942 | 1.067925  | 0.295741  |
| C  | -4.556334 | -0.448064 | -2.621216 |
| H  | -5.190975 | -0.852389 | -3.405201 |
| C  | -2.312583 | -0.302969 | -1.652640 |
| C  | 1.982326  | -2.523501 | -1.874770 |
| C  | 2.690927  | -3.747102 | 0.109692  |
| C  | 0.419904  | -2.919677 | -0.034475 |
| C  | -4.262634 | 0.890445  | -0.638657 |
| C  | -2.872717 | 0.570329  | -0.650686 |
| C  | -2.650133 | -0.981355 | 3.552865  |
| H  | -2.232312 | 0.022135  | 3.432851  |
| H  | -2.180323 | -1.409839 | 4.441990  |
| H  | -3.723827 | -0.886584 | 3.732901  |
| C  | 4.281064  | 0.148170  | 0.225066  |
| C  | 1.415127  | -3.627250 | 0.654069  |
| H  | 1.188602  | -4.054101 | 1.626731  |
| C  | 5.029257  | -0.445452 | 1.280903  |
| C  | 2.971550  | -3.188046 | -1.139860 |
| H  | 3.972081  | -3.273913 | -1.555165 |
| C  | 4.380750  | -1.074587 | 2.337586  |
| C  | 0.704091  | -2.379271 | -1.307423 |
| C  | 2.987417  | -1.144305 | 2.397462  |
| H  | 2.501212  | -1.641883 | 3.225746  |
| C  | -0.420777 | -1.721760 | -2.077264 |
| C  | 2.188147  | -0.552016 | 1.383750  |
| C  | -3.180837 | -0.777964 | -2.636161 |
| H  | -2.788476 | -1.423370 | -3.407547 |
| C  | 2.864828  | 0.097659  | 0.272686  |
| C  | -5.104989 | 0.360379  | -1.650005 |
| H  | -6.163224 | 0.603382  | -1.645593 |
| C  | 0.030078  | -1.177168 | 2.292740  |
| C  | -4.728019 | 1.729467  | 0.405842  |
| H  | -5.783134 | 1.986127  | 0.445886  |
| C  | -1.116697 | -1.958911 | 1.740018  |
| C  | -2.486594 | 1.860261  | 1.251697  |
| H  | -1.742640 | 2.243820  | 1.942020  |
| C  | -2.395458 | -1.836463 | 2.334119  |
| C  | 0.374569  | 3.178820  | -0.045181 |
| C  | -3.468470 | -2.504613 | 1.733733  |
| H  | -4.460220 | -2.399945 | 2.164276  |
| C  | -3.290422 | -3.289283 | 0.594840  |
| H  | -4.140541 | -3.795819 | 0.147502  |
| C  | -2.024924 | -3.423338 | 0.029158  |
| H  | -1.878792 | -4.027065 | -0.860687 |
| C  | -0.930493 | -2.755127 | 0.586333  |
| C  | -3.848516 | 2.212029  | 1.351101  |
| H  | 3.469116  | -4.269587 | 0.657651  |
| H  | 4.965716  | -1.528745 | 3.130364  |

|   |           |           |           |
|---|-----------|-----------|-----------|
| H | 6.113375  | -0.407751 | 1.244098  |
| C | 4.873413  | 0.785294  | -0.891764 |
| C | 4.065304  | 1.333402  | -1.868797 |
| C | 2.668119  | 1.240961  | -1.727915 |
| H | 5.955305  | 0.838662  | -0.966099 |
| H | 4.485440  | 1.831717  | -2.734764 |
| H | 1.991235  | 1.686441  | -2.448451 |
| C | 2.288181  | -1.960634 | -3.242141 |
| H | 3.360495  | -1.991861 | -3.451256 |
| H | 1.761173  | -2.525857 | -4.016407 |
| H | 1.953090  | -0.922503 | -3.328112 |
| C | 0.645499  | 4.684510  | 0.079942  |
| C | 2.144142  | 4.855100  | 0.411804  |
| H | 2.386590  | 5.916521  | 0.532445  |
| H | 2.396929  | 4.331505  | 1.337561  |
| H | 2.771586  | 4.452544  | -0.391825 |
| C | -0.212451 | 5.234185  | 1.237269  |
| H | -1.280515 | 5.104979  | 1.028253  |
| H | 0.017357  | 4.712402  | 2.169505  |
| H | -0.020703 | 6.303614  | 1.377039  |
| C | 0.308745  | 5.414871  | -1.226920 |
| H | 0.898515  | 5.021499  | -2.059384 |
| H | -0.748615 | 5.297804  | -1.482142 |
| H | 0.522556  | 6.484525  | -1.124872 |
| H | -4.180147 | 2.855966  | 2.158037  |

**5**

Energy = -2171.34222069 ZPE = -2170.701082 H =  
-2170.659888 G = -2170.770951

|    |           |           |           |
|----|-----------|-----------|-----------|
| Co | 0.031607  | 0.735551  | -0.008750 |
| O  | -0.271932 | -1.660890 | -3.322005 |
| O  | 0.478435  | 2.390315  | 1.014589  |
| O  | 0.040526  | -1.650112 | 3.326877  |
| O  | -0.199955 | 2.434456  | -1.046162 |
| N  | 1.892938  | 0.683327  | -0.495248 |
| N  | -0.654147 | -0.399904 | -1.423269 |
| N  | 0.571821  | -0.461618 | 1.417561  |
| N  | -1.819640 | 0.915428  | 0.479981  |
| C  | -4.212025 | -0.266443 | -2.662283 |
| H  | -4.809667 | -0.579353 | -3.513773 |
| C  | -2.005787 | -0.128810 | -1.636690 |
| C  | 2.315320  | -2.355764 | -1.835970 |
| C  | 2.767105  | -3.710415 | 0.134970  |
| C  | 0.542835  | -2.815589 | -0.205783 |
| C  | -4.040191 | 0.752514  | -0.484343 |
| C  | -2.638574 | 0.527622  | -0.538183 |
| C  | -3.005528 | -1.426250 | 3.151924  |
| H  | -2.428692 | -0.525775 | 3.369814  |
| H  | -2.829474 | -2.119400 | 3.982095  |
| H  | -4.066844 | -1.164058 | 3.147344  |
| C  | 4.073475  | 0.284478  | 0.491110  |
| C  | 1.439933  | -3.584125 | 0.544674  |
| H  | 1.095510  | -4.066881 | 1.454169  |
| C  | 4.803463  | -0.204608 | 1.603846  |
| C  | 3.195652  | -3.108112 | -1.047648 |
| H  | 4.227602  | -3.222563 | -1.368798 |
| C  | 4.113279  | -0.715196 | 2.684360  |
| C  | 0.997258  | -2.178945 | -1.378353 |
| C  | 2.700569  | -0.786702 | 2.721558  |
| H  | 2.197771  | -1.203294 | 3.581039  |
| C  | -0.006485 | -1.370967 | -2.148330 |
| C  | 1.944325  | -0.343236 | 1.637672  |
| C  | -2.816929 | -0.498351 | -2.708705 |
| H  | -2.373213 | -0.981683 | -3.565878 |

|   |           |           |           |   |           |           |           |
|---|-----------|-----------|-----------|---|-----------|-----------|-----------|
| C | 2.655162  | 0.220556  | 0.535509  | C | 0.470087  | -2.905062 | -0.079717 |
| C | -4.830556 | 0.333895  | -1.584461 | C | -4.267667 | 0.821445  | -0.596816 |
| H | -5.902827 | 0.500074  | -1.567719 | C | -2.871909 | 0.529090  | -0.625388 |
| C | -0.185977 | -1.343618 | 2.149128  | C | -2.647862 | -1.090435 | 3.532222  |
| C | -4.544331 | 1.385269  | 0.680921  | H | -2.240039 | -0.080061 | 3.439529  |
| H | -5.611186 | 1.571634  | 0.762908  | H | -2.181850 | -1.534533 | 4.415743  |
| C | -1.273294 | -2.038852 | 1.383399  | H | -3.724157 | -1.011490 | 3.704204  |
| C | -2.305571 | 1.515189  | 1.555558  | C | 4.288662  | 0.194047  | 0.265447  |
| H | -1.584034 | 1.816744  | 2.304752  | C | 1.474774  | -3.608859 | 0.598694  |
| C | -2.602370 | -2.064455 | 1.843079  | H | 1.252571  | -4.057925 | 1.562288  |
| C | 0.194781  | 3.086318  | -0.021317 | C | 5.035602  | -0.417449 | 1.312120  |
| C | -3.561825 | -2.721059 | 1.061649  | C | 3.029467  | -3.109502 | -1.181557 |
| H | -4.599416 | -2.718947 | 1.384967  | H | 4.032717  | -3.170667 | -1.594640 |
| C | -3.204678 | -3.375423 | -0.117244 | C | 4.387421  | -1.082085 | 2.348255  |
| H | -3.964078 | -3.875934 | -0.710903 | C | 0.749020  | -2.337849 | -1.342488 |
| C | -1.872353 | -3.400961 | -0.528392 | C | 2.996099  | -1.169783 | 2.396349  |
| H | -1.584660 | -3.926497 | -1.433828 | H | 2.509558  | -1.692172 | 3.209007  |
| C | -0.894055 | -2.732293 | 0.216320  | C | -0.387756 | -1.690534 | -2.103992 |
| C | -3.686876 | 1.760124  | 1.694070  | C | 2.194458  | -0.554898 | 1.394695  |
| H | 3.465694  | -4.287766 | 0.733569  | C | -3.169312 | -0.789982 | -2.632566 |
| H | 4.665457  | -1.081079 | 3.545359  | H | -2.770142 | -1.413599 | -3.418341 |
| H | 5.887737  | -0.161121 | 1.593873  | C | 2.872653  | 0.128786  | 0.301180  |
| C | 4.654883  | 0.840173  | -0.677300 | C | -5.107589 | 0.291034  | -1.609999 |
| C | 3.853090  | 1.294301  | -1.703606 | H | -6.170473 | 0.512329  | -1.592933 |
| C | 2.451930  | 1.207921  | -1.574587 | C | 0.041895  | -1.219386 | 2.285270  |
| H | 5.736526  | 0.904734  | -0.751154 | C | -4.740144 | 1.634866  | 0.464970  |
| H | 4.275853  | 1.719269  | -2.606375 | H | -5.799609 | 1.870390  | 0.518058  |
| H | 1.774863  | 1.576458  | -2.335305 | C | -1.089260 | -2.005849 | 1.707507  |
| C | 2.790522  | -1.777047 | -3.148574 | C | -2.493903 | 1.795102  | 1.293647  |
| H | 3.868563  | -1.596574 | -3.127122 | H | -1.752083 | 2.181828  | 1.984736  |
| H | 2.579840  | -2.473102 | -3.968466 | C | -2.373067 | -1.914719 | 2.296638  |
| H | 2.288718  | -0.840451 | -3.396721 | C | 0.315427  | 3.196136  | -0.034587 |
| C | 0.355829  | 4.594191  | -0.017574 | C | -3.432768 | -2.585351 | 1.675735  |
| C | 1.864762  | 4.885830  | 0.156328  | H | -4.428351 | -2.504151 | 2.102463  |
| H | 2.028237  | 5.967689  | 0.179402  | C | -3.236928 | -3.343066 | 0.521736  |
| H | 2.239983  | 4.455751  | 1.088677  | H | -4.077037 | -3.852101 | 0.058636  |
| H | 2.444264  | 4.469496  | -0.674578 | C | -1.966498 | -3.447053 | -0.038897 |
| C | -0.433009 | 5.156821  | 1.183673  | H | -1.806732 | -4.029145 | -0.940662 |
| H | -1.502654 | 4.942172  | 1.087067  | C | -0.885137 | -2.774503 | 0.538287  |
| H | -0.078233 | 4.721782  | 2.121377  | C | -3.861646 | 2.119803  | 1.409715  |
| H | -0.305197 | 6.242606  | 1.231474  | H | 3.539578  | -4.215047 | 0.597963  |
| C | -0.158916 | 5.190119  | -1.335543 | H | 4.972937  | -1.549158 | 3.133053  |
| H | 0.385223  | 4.782414  | -2.191816 | H | 6.119402  | -0.365270 | 1.285154  |
| H | -1.222271 | 4.976027  | -1.477142 | C | 4.883742  | 0.865185  | -0.830045 |
| H | -0.024487 | 6.276050  | -1.324547 | C | 4.077997  | 1.430384  | -1.798998 |
| H | -4.050731 | 2.242309  | 2.593751  | C | 2.680912  | 1.318551  | -1.672859 |

### 5-t

Energy = -2171.32531902 ZPE = -2170.68872 H = -  
2170.645684 G = -2170.764437

|    |           |           |           |   |           |           |           |
|----|-----------|-----------|-----------|---|-----------|-----------|-----------|
| Co | -0.004249 | 0.678013  | -0.199611 | H | 4.499857  | 1.955439  | -2.648173 |
| O  | -0.749848 | -2.221597 | -3.166459 | H | 2.004237  | 1.772920  | -2.388284 |
| O  | 0.542100  | 2.471752  | 0.987437  | C | 2.329326  | -1.858209 | -3.265040 |
| O  | 0.201927  | -1.026845 | 3.484888  | H | 3.400796  | -1.880513 | -3.479373 |
| O  | -0.060298 | 2.675492  | -1.132204 | H | 1.801006  | -2.409817 | -4.048175 |
| N  | 2.102087  | 0.674298  | -0.663528 | H | 1.989637  | -0.819810 | -3.327948 |
| N  | -0.954607 | -0.626708 | -1.470810 | C | 0.524790  | 4.713086  | 0.080323  |
| N  | 0.861765  | -0.592725 | 1.318578  | C | 2.017555  | 4.950826  | 0.394740  |
| N  | -2.027651 | 1.026154  | 0.322393  | H | 2.215162  | 6.022374  | 0.508037  |
| C  | -4.551229 | -0.489502 | -2.599670 | H | 2.302304  | 4.442934  | 1.319863  |
| H  | -5.184612 | -0.893459 | -3.384882 | H | 2.653625  | 4.571869  | -0.413574 |
| C  | -2.303274 | -0.313863 | -1.648046 | C | -0.343122 | 5.228387  | 1.246310  |
| C  | 2.031214  | -2.449946 | -1.908272 | H | -1.406944 | 5.052534  | 1.049936  |
| C  | 2.754203  | -3.696161 | 0.056957  | H | -0.080006 | 4.718871  | 2.176573  |
|    |           |           |           | H | -0.196312 | 6.305418  | 1.382044  |
|    |           |           |           | C | 0.140314  | 5.423606  | -1.224251 |
|    |           |           |           | H | 0.736837  | 5.053852  | -2.062802 |

|   |           |          |           |
|---|-----------|----------|-----------|
| H | -0.913739 | 5.259024 | -1.466380 |
| H | 0.307846  | 6.502075 | -1.128100 |
| H | -4.198338 | 2.744858 | 2.229343  |

**6-d**

Energy = -1824.86033217 ZPE = -1824.358961 H =  
-1824.325265 G = -1824.423763

|   |           |           |           |
|---|-----------|-----------|-----------|
| C | 2.550346  | 0.421521  | 0.973231  |
| C | 3.836415  | 0.007902  | 1.316033  |
| C | 4.950096  | 0.849879  | 1.089305  |
| C | 4.823221  | 2.104609  | 0.530581  |
| C | 3.533147  | 2.571658  | 0.171131  |
| C | 2.411353  | 1.726580  | 0.404415  |
| N | 1.141044  | 2.120595  | 0.083461  |
| C | 0.936430  | 3.306942  | -0.478382 |
| C | 1.992035  | 4.197230  | -0.754517 |
| C | 3.281282  | 3.832687  | -0.424712 |
| N | 1.357908  | -0.299286 | 1.058827  |
| H | 5.934928  | 0.483656  | 1.364882  |
| H | 5.687890  | 2.737290  | 0.357352  |
| H | 4.113871  | 4.502145  | -0.621135 |
| H | 1.774531  | 5.152666  | -1.217867 |
| H | -0.091371 | 3.557231  | -0.715470 |
| C | 1.263106  | -1.462187 | 1.771866  |
| C | 0.010449  | -2.260757 | 1.498015  |
| C | -0.956665 | -2.454791 | 2.500692  |
| C | -0.142646 | -2.836244 | 0.223996  |
| C | -2.085330 | -3.225038 | 2.194593  |
| C | -1.275160 | -3.610207 | -0.052252 |
| C | -2.243823 | -3.802110 | 0.932233  |
| H | -2.847533 | -3.374183 | 2.955050  |
| H | -1.399576 | -4.039300 | -1.041838 |
| H | -3.125324 | -4.399259 | 0.717013  |
| O | 2.097831  | -1.897395 | 2.577493  |
| H | 3.976967  | -0.966795 | 1.758604  |
| C | -0.788520 | -1.821715 | 3.862022  |
| H | 0.126331  | -2.177782 | 4.344081  |
| H | -0.698229 | -0.732004 | 3.777487  |
| H | -1.639428 | -2.042859 | 4.511130  |
| C | -2.621294 | -0.162419 | -0.979564 |
| C | -3.721985 | -0.380685 | -1.642320 |
| C | -5.009157 | 0.188946  | -1.497247 |
| C | -5.242014 | 1.298071  | -0.711329 |
| C | -4.156710 | 1.883255  | -0.011267 |
| C | -2.863977 | 1.302552  | -0.151175 |
| N | -1.782904 | 1.804819  | 0.516464  |
| C | -1.921041 | 2.860672  | 1.312073  |
| C | -3.161772 | 3.499390  | 1.497515  |
| C | -4.271979 | 3.011095  | 0.839081  |
| N | -1.293178 | -0.280302 | -0.979523 |
| H | -5.835838 | -0.271576 | -2.030777 |
| H | -6.235042 | 1.724990  | -0.613222 |
| H | -5.243015 | 3.480401  | 0.968244  |
| H | -3.225450 | 4.358109  | 2.155712  |
| H | -1.022808 | 3.206641  | 1.812911  |
| C | -0.839951 | -1.102604 | -1.972020 |
| C | 0.574748  | -1.608772 | -1.833547 |
| C | 1.555016  | -1.208048 | -2.760407 |
| C | 0.877350  | -2.535688 | -0.823599 |
| C | 2.837321  | -1.759562 | -2.656593 |
| C | 2.165504  | -3.080714 | -0.748429 |
| C | 3.140975  | -2.696878 | -1.666585 |
| H | 3.606109  | -1.448838 | -3.359524 |
| H | 2.399894  | -3.783498 | 0.045249  |

|    |           |           |           |
|----|-----------|-----------|-----------|
| H  | 4.140612  | -3.117440 | -1.605542 |
| O  | -1.483966 | -1.459236 | -2.971433 |
| H  | -3.584157 | -1.240164 | -2.279958 |
| C  | 1.236552  | -0.178300 | -3.819368 |
| H  | 0.442008  | -0.533296 | -4.481760 |
| H  | 0.876401  | 0.751313  | -3.362031 |
| H  | 2.118277  | 0.058902  | -4.420054 |
| Co | -0.191148 | 0.679232  | 0.391762  |

**6-quar**

Energy = -1824.88233945 ZPE = -1824.380744 H =  
-1824.347144 G = -1824.445696

|   |           |           |           |
|---|-----------|-----------|-----------|
| C | 2.586071  | 0.424017  | 1.182581  |
| C | 3.717502  | 0.101638  | 1.932690  |
| C | 4.949727  | 0.762866  | 1.722527  |
| C | 5.097273  | 1.753380  | 0.776561  |
| C | 3.978665  | 2.122577  | -0.013345 |
| C | 2.731041  | 1.462075  | 0.193035  |
| N | 1.633313  | 1.792299  | -0.554362 |
| C | 1.712318  | 2.731812  | -1.488344 |
| C | 2.906154  | 3.428259  | -1.755246 |
| C | 4.030319  | 3.122162  | -1.016978 |
| N | 1.323067  | -0.164752 | 1.253634  |
| H | 5.799782  | 0.471823  | 2.333150  |
| H | 6.047616  | 2.254961  | 0.623267  |
| H | 4.967991  | 3.640799  | -1.195972 |
| H | 2.924287  | 4.187057  | -2.529073 |
| H | 0.801257  | 2.937167  | -2.042040 |
| C | 1.039872  | -1.233255 | 2.049678  |
| C | -0.310817 | -1.857517 | 1.765278  |
| C | -1.331690 | -1.778305 | 2.733234  |
| C | -0.531369 | -2.518902 | 0.539462  |
| C | -2.567099 | -2.373648 | 2.455826  |
| C | -1.776043 | -3.116891 | 0.296851  |
| C | -2.788107 | -3.044141 | 1.250391  |
| H | -3.364241 | -2.309224 | 3.191858  |
| H | -1.948427 | -3.614520 | -0.652272 |
| H | -3.752069 | -3.504863 | 1.054679  |
| O | 1.759840  | -1.728588 | 2.930225  |
| H | 3.636906  | -0.670783 | 2.682499  |
| C | -1.104650 | -1.031636 | 4.027174  |
| H | -0.258415 | -1.452500 | 4.576898  |
| H | -0.864949 | 0.020645  | 3.831930  |
| H | -1.992055 | -1.063665 | 4.664141  |
| C | -2.582906 | 0.412791  | -1.191563 |
| C | -3.712070 | 0.087578  | -1.943874 |
| C | -4.944953 | 0.749573  | -1.740049 |
| C | -5.095434 | 1.743599  | -0.798249 |
| C | -3.979241 | 2.115811  | -0.006345 |
| C | -2.730902 | 1.454743  | -0.206518 |
| N | -1.635531 | 1.788113  | 0.542945  |
| C | -1.717514 | 2.730945  | 1.473273  |
| C | -2.912369 | 3.427899  | 1.734231  |
| C | -4.034163 | 3.118967  | 0.993555  |
| N | -1.319748 | -0.176644 | -1.256378 |
| H | -5.793097 | 0.456184  | -2.352205 |
| H | -6.046261 | 2.245677  | -0.649651 |
| H | -4.972479 | 3.638062  | 1.167769  |
| H | -2.933002 | 4.189467  | 2.505266  |
| H | -0.808048 | 2.938737  | 2.028677  |
| C | -1.037446 | -1.254305 | -2.040430 |
| C | 0.310993  | -1.879604 | -1.747470 |
| C | 1.332742  | -1.816176 | -2.715603 |
| C | 0.528142  | -2.527539 | -0.513824 |

|    |           |           |           |
|----|-----------|-----------|-----------|
| C  | 2.565435  | -2.413566 | -2.430505 |
| C  | 1.770000  | -3.128259 | -0.263611 |
| C  | 2.782882  | -3.071108 | -1.217358 |
| H  | 3.363178  | -2.361265 | -3.166852 |
| H  | 1.939724  | -3.615562 | 0.691331  |
| H  | 3.744670  | -3.533829 | -1.015755 |
| O  | -1.757481 | -1.757822 | -2.916295 |
| H  | -3.629230 | -0.687961 | -2.690202 |
| C  | 1.109881  | -1.083909 | -4.018490 |
| H  | 0.261113  | -1.506402 | -4.562998 |
| H  | 0.876446  | -0.027920 | -3.836017 |
| H  | 1.997037  | -1.128947 | -4.654998 |
| Co | 0.000823  | 0.666053  | -0.004704 |

**1-d**

Energy = -1827.30404233 ZPE = -1825.552782 H =  
-1825.517981 G = -1825.62042

|   |           |           |           |
|---|-----------|-----------|-----------|
| C | -1.543035 | 2.326215  | 0.282074  |
| C | -2.128842 | 3.590642  | 0.255151  |
| C | -3.359538 | 3.827550  | 0.913057  |
| C | -4.020773 | 2.842134  | 1.615139  |
| C | -3.457126 | 1.541458  | 1.679189  |
| C | -2.232392 | 1.293020  | 0.997358  |
| N | -1.647536 | 0.056982  | 1.009119  |
| C | -2.197078 | -0.927843 | 1.703374  |
| C | -3.396491 | -0.763034 | 2.424711  |
| C | -4.029103 | 0.461655  | 2.399161  |
| N | -0.347815 | 1.907724  | -0.307602 |
| H | -3.784026 | 4.826302  | 0.863343  |
| H | -4.956923 | 3.043535  | 2.126478  |
| H | -4.962377 | 0.616074  | 2.933267  |
| H | -3.806631 | -1.602058 | 2.975039  |
| H | -1.675286 | -1.876990 | 1.676469  |
| C | 0.534818  | 2.764322  | -0.903353 |
| C | 1.754695  | 2.049998  | -1.427301 |
| C | 3.049716  | 2.438806  | -1.028651 |
| C | 1.584411  | 0.933745  | -2.260413 |
| C | 4.126120  | 1.632232  | -1.420710 |
| C | 2.671795  | 0.151553  | -2.656490 |
| C | 3.947696  | 0.493516  | -2.211630 |
| H | 0.593690  | 0.718696  | -2.644989 |
| H | 5.127008  | 1.899189  | -1.091538 |
| H | 2.518295  | -0.709431 | -3.299671 |
| H | 4.805916  | -0.111053 | -2.489400 |
| O | 0.427380  | 3.996491  | -0.999904 |
| H | -1.627960 | 4.390863  | -0.268545 |
| C | 3.296258  | 3.673995  | -0.194711 |
| H | 2.572725  | 3.775467  | 0.618092  |
| H | 4.301495  | 3.659001  | 0.234495  |
| H | 3.194391  | 4.576151  | -0.806022 |
| C | 1.557893  | -2.287580 | 0.332039  |
| C | 2.167964  | -3.540874 | 0.319566  |
| C | 3.405348  | -3.746227 | 0.975609  |
| C | 4.049877  | -2.740380 | 1.663962  |
| C | 3.461577  | -1.450109 | 1.713947  |
| C | 2.231269  | -1.232838 | 1.031178  |
| N | 1.625745  | -0.007220 | 1.026887  |
| C | 2.156763  | 0.995883  | 1.709265  |
| C | 3.358423  | 0.861477  | 2.432877  |
| C | 4.013797  | -0.351508 | 2.420676  |
| N | 0.351814  | -1.900141 | -0.258517 |
| H | 3.848484  | -4.737319 | 0.936160  |
| H | 4.990983  | -2.917919 | 2.175042  |
| H | 4.950339  | -0.482206 | 2.955394  |

|    |           |           |           |
|----|-----------|-----------|-----------|
| H  | 3.753316  | 1.714157  | 2.973279  |
| H  | 1.618765  | 1.935594  | 1.668385  |
| C  | -0.515830 | -2.786264 | -0.832575 |
| C  | -1.753853 | -2.113364 | -1.368253 |
| C  | -3.037645 | -2.526689 | -0.958231 |
| C  | -1.614999 | -1.016172 | -2.231641 |
| C  | -4.136745 | -1.763500 | -1.374083 |
| C  | -2.723672 | -0.276730 | -2.649544 |
| C  | -3.990210 | -0.643177 | -2.196886 |
| H  | -0.630416 | -0.781229 | -2.620142 |
| H  | -5.129903 | -2.050074 | -1.038030 |
| H  | -2.593936 | 0.570069  | -3.316400 |
| H  | -4.865122 | -0.072072 | -2.492866 |
| O  | -0.383017 | -4.017883 | -0.904023 |
| H  | 1.680794  | -4.357652 | -0.191138 |
| C  | -3.250989 | -3.744413 | -0.090119 |
| H  | -2.512820 | -3.815473 | 0.712601  |
| H  | -4.249746 | -3.735148 | 0.354230  |
| H  | -3.144804 | -4.659587 | -0.681204 |
| Co | -0.004712 | 0.005475  | -0.137132 |

**1-quar**

Energy = -1827.32847823 ZPE = -1825.571101 H =  
-1825.535889 G = -1825.639044

|   |           |           |           |
|---|-----------|-----------|-----------|
| C | -2.031803 | 1.930868  | -0.080173 |
| C | -2.864919 | 2.919695  | -0.598453 |
| C | -4.231177 | 2.987912  | -0.238630 |
| C | -4.797799 | 2.096922  | 0.646200  |
| C | -3.990485 | 1.077357  | 1.213321  |
| C | -2.616399 | 0.991664  | 0.842942  |
| N | -1.812810 | 0.006939  | 1.351551  |
| C | -2.300520 | -0.872391 | 2.216323  |
| C | -3.639875 | -0.845162 | 2.647944  |
| C | -4.478865 | 0.124265  | 2.140783  |
| N | -0.684140 | 1.719735  | -0.377856 |
| H | -4.841455 | 3.772263  | -0.677307 |
| H | -5.845803 | 2.161556  | 0.921701  |
| H | -5.521792 | 0.167635  | 2.441971  |
| H | -3.990708 | -1.586702 | 3.356383  |
| H | -1.609842 | -1.630902 | 2.570781  |
| C | 0.106158  | 2.645314  | -0.994401 |
| C | 1.517968  | 2.151036  | -1.219650 |
| C | 2.605768  | 2.793302  | -0.593129 |
| C | 1.740027  | 1.042131  | -2.045301 |
| C | 3.888777  | 2.274682  | -0.799049 |
| C | 3.029034  | 0.547865  | -2.253637 |
| C | 4.106177  | 1.163095  | -1.618838 |
| H | 0.893177  | 0.560796  | -2.521404 |
| H | 4.732041  | 2.743166  | -0.298182 |
| H | 3.182167  | -0.321028 | -2.885759 |
| H | 5.112744  | 0.777502  | -1.751171 |
| O | -0.213176 | 3.793373  | -1.337865 |
| H | -2.448939 | 3.643950  | -1.283261 |
| C | 2.388424  | 3.979690  | 0.314946  |
| H | 1.696878  | 3.729360  | 1.128201  |
| H | 3.328579  | 4.314016  | 0.760836  |
| H | 1.937401  | 4.812144  | -0.231664 |
| C | 2.031556  | -1.931365 | -0.081798 |
| C | 2.863976  | -2.920555 | -0.600536 |
| C | 4.230239  | -2.989842 | -0.240879 |
| C | 4.797548  | -2.099541 | 0.644210  |
| C | 3.990958  | -1.079607 | 1.211736  |
| C | 2.616893  | -0.992850 | 0.841535  |
| N | 1.814053  | -0.007753 | 1.350531  |

|    |           |           |           |
|----|-----------|-----------|-----------|
| C  | 2.302446  | 0.870963  | 2.215498  |
| C  | 3.641802  | 0.842672  | 2.647026  |
| C  | 4.480089  | -0.127172 | 2.139503  |
| N  | 0.683983  | -1.719314 | -0.379177 |
| H  | 4.839934  | -3.774463 | -0.679892 |
| H  | 5.845534  | -2.164982 | 0.919606  |
| H  | 5.523014  | -0.171382 | 2.440611  |
| H  | 3.993198  | 1.583727  | 3.355693  |
| H  | 1.612372  | 1.629907  | 2.570191  |
| C  | -0.106872 | -2.644234 | -0.995938 |
| C  | -1.518553 | -2.149389 | -1.220791 |
| C  | -2.606495 | -2.791568 | -0.594384 |
| C  | -1.740398 | -1.040157 | -2.046108 |
| C  | -3.889363 | -2.272595 | -0.800093 |
| C  | -3.029343 | -0.545556 | -2.254248 |
| C  | -4.106577 | -1.160758 | -1.619576 |
| H  | -0.893447 | -0.558844 | -2.522079 |
| H  | -4.732699 | -2.741005 | -0.299295 |
| H  | -3.182305 | 0.323565  | -2.886104 |
| H  | -5.113058 | -0.774898 | -1.751737 |
| O  | 0.211873  | -3.792298 | -1.340021 |
| H  | 2.447440  | -3.644305 | -1.285544 |
| C  | -2.389375 | -3.978258 | 0.313313  |
| H  | -1.697580 | -3.728401 | 1.126500  |
| H  | -3.329546 | -4.312393 | 0.759301  |
| H  | -1.938745 | -4.810711 | -0.233622 |
| Co | 0.000375  | 0.000148  | 0.367592  |

#### CoOPiv2-d

Energy = -838.060705763 ZPE = -837.786821 H = -837.767705 G = -837.83456

|    |           |           |           |
|----|-----------|-----------|-----------|
| C  | -2.312948 | 0.027042  | 0.008241  |
| O  | -1.627451 | -1.056606 | 0.004472  |
| O  | -1.633509 | 1.111424  | 0.005842  |
| C  | -3.829208 | -0.000890 | 0.002755  |
| C  | -4.273552 | -0.673819 | -1.316586 |
| H  | -3.948708 | -0.091502 | -2.185112 |
| H  | -3.858905 | -1.681752 | -1.399787 |
| H  | -5.365569 | -0.742904 | -1.341250 |
| C  | -4.295522 | -0.851992 | 1.204072  |
| H  | -3.879666 | -1.861259 | 1.152084  |
| H  | -3.987609 | -0.398635 | 2.152030  |
| H  | -5.387623 | -0.923359 | 1.199525  |
| C  | -4.393359 | 1.423843  | 0.096755  |
| H  | -4.075622 | 1.913911  | 1.021419  |
| H  | -4.059014 | 2.037592  | -0.744020 |
| H  | -5.486995 | 1.385867  | 0.084353  |
| Co | 0.000003  | 0.028020  | -0.000435 |
| C  | 2.312955  | 0.026999  | -0.008949 |
| O  | 1.627436  | -1.056630 | -0.005333 |
| O  | 1.633536  | 1.111399  | -0.006651 |
| C  | 3.829207  | -0.000919 | -0.002449 |
| C  | 4.272314  | -0.668982 | 1.319843  |
| H  | 3.946445  | -0.083579 | 2.185907  |
| H  | 3.857814  | -1.676714 | 1.406289  |
| H  | 5.364324  | -0.737740 | 1.345876  |
| C  | 4.296713  | -0.856376 | -1.200136 |
| H  | 3.880741  | -1.865417 | -1.144958 |
| H  | 3.989816  | -0.406430 | -2.150047 |
| H  | 5.388806  | -0.927771 | -1.194195 |
| C  | 4.393382  | 1.423494  | -0.101035 |
| H  | 4.076422  | 1.910215  | -1.027740 |
| H  | 4.058264  | 2.040207  | 0.737245  |
| H  | 5.487009  | 1.385628  | -0.087567 |

#### CoOPiv2-quar

Energy = -838.076737519 ZPE = -837.804355 H = -837.784434 G = -837.854561

|    |           |           |           |
|----|-----------|-----------|-----------|
| C  | -2.416232 | 0.031380  | 0.019031  |
| O  | -1.750709 | -1.061377 | 0.014736  |
| O  | -1.764573 | 1.128765  | 0.021812  |
| C  | -3.940152 | -0.004319 | 0.001321  |
| C  | -4.369756 | -0.659034 | -1.331625 |
| H  | -4.037356 | -0.063391 | -2.188578 |
| H  | -3.949803 | -1.663878 | -1.425087 |
| H  | -5.461395 | -0.731853 | -1.371299 |
| C  | -4.416913 | -0.874939 | 1.183264  |
| H  | -3.993876 | -1.880516 | 1.121000  |
| H  | -4.121801 | -0.434555 | 2.141671  |
| H  | -5.508811 | -0.952668 | 1.167396  |
| C  | -4.520596 | 1.412547  | 0.109923  |
| H  | -4.214437 | 1.893343  | 1.043425  |
| H  | -4.184355 | 2.041152  | -0.718955 |
| H  | -5.614173 | 1.366001  | 0.088115  |
| Co | -0.000110 | 0.033409  | 0.001305  |
| C  | 2.416247  | 0.032207  | -0.017961 |
| O  | 1.750185  | -1.060323 | -0.013025 |
| O  | 1.765094  | 1.129741  | -0.020280 |
| C  | 3.940171  | -0.004462 | -0.002364 |
| C  | 4.371791  | -0.665177 | 1.326871  |
| H  | 4.041437  | -0.073003 | 2.186999  |
| H  | 3.951241  | -1.670083 | 1.416772  |
| H  | 5.463453  | -0.738946 | 1.364185  |
| C  | 4.414388  | -0.870346 | -1.188947 |
| H  | 3.991020  | -1.876003 | -1.130091 |
| H  | 4.117692  | -0.425777 | -2.144938 |
| H  | 5.506280  | -0.948588 | -1.175410 |
| C  | 4.521380  | 1.412471  | -0.106045 |
| H  | 4.213855  | 1.897437  | -1.036927 |
| H  | 4.187101  | 2.037781  | 0.726118  |
| H  | 5.614963  | 1.365082  | -0.086377 |

#### C-q

Energy = -2172.48833307 ZPE = -2171.82981 H = -2171.78564 G = -2171.90769

|   |           |           |           |
|---|-----------|-----------|-----------|
| C | -0.623275 | -2.724728 | -1.197170 |
| C | -0.653073 | -4.108349 | -1.388840 |
| C | -1.773063 | -4.743535 | -1.967680 |
| C | -2.887726 | -4.036267 | -2.366779 |
| C | -2.912364 | -2.629284 | -2.185473 |
| C | -1.788468 | -1.983416 | -1.593587 |
| N | -1.772076 | -0.636738 | -1.373728 |
| C | -2.809015 | 0.102681  | -1.749224 |
| C | -3.950912 | -0.448121 | -2.360890 |
| C | -4.003924 | -1.810664 | -2.567403 |
| N | 0.447186  | -1.965566 | -0.742641 |
| H | -1.743701 | -5.821277 | -2.099366 |
| H | -3.743285 | -4.532577 | -2.813740 |
| H | -4.876189 | -2.269916 | -3.023881 |
| H | -4.769514 | 0.201804  | -2.648087 |
| H | -2.747935 | 1.165443  | -1.547589 |
| C | 1.577511  | -2.592203 | -0.226757 |
| C | 2.886599  | -1.963432 | -0.590680 |
| C | 4.028480  | -2.094540 | 0.232588  |
| C | 2.992025  | -1.323764 | -1.834983 |
| C | 5.231343  | -1.537177 | -0.221420 |
| C | 4.203707  | -0.796807 | -2.278397 |
| C | 5.328929  | -0.899121 | -1.459368 |

|    |           |           |           |   |           |           |           |
|----|-----------|-----------|-----------|---|-----------|-----------|-----------|
| H  | 2.106147  | -1.263179 | -2.458578 | C | 2.370884  | 1.957048  | -0.845466 |
| H  | 6.111378  | -1.606737 | 0.412538  | C | 3.193401  | 3.085513  | -0.907092 |
| H  | 4.266771  | -0.312471 | -3.248299 | C | 4.480719  | 3.028131  | -1.483183 |
| H  | 6.280304  | -0.484400 | -1.779791 | C | 5.000077  | 1.859465  | -2.002906 |
| O  | 1.537205  | -3.621117 | 0.458150  | C | 4.216458  | 0.679111  | -1.950949 |
| H  | 0.195826  | -4.705593 | -1.086237 | C | 2.913180  | 0.733407  | -1.371587 |
| C  | 3.997525  | -2.795766 | 1.569990  | N | 2.134060  | -0.376657 | -1.275579 |
| H  | 4.901699  | -2.570139 | 2.142376  | C | 2.567889  | -1.539740 | -1.732188 |
| H  | 3.125197  | -2.499814 | 2.158132  | C | 3.834063  | -1.684624 | -2.336960 |
| H  | 3.925877  | -3.878970 | 1.439378  | C | 4.652262  | -0.579100 | -2.440126 |
| C  | -1.546985 | 2.827701  | 0.016040  | N | 1.049134  | 1.919578  | -0.413775 |
| C  | -2.416389 | 3.889553  | 0.176065  | H | 5.073145  | 3.938702  | -1.513203 |
| C  | -2.317218 | 5.031588  | -0.653137 | H | 5.992581  | 1.826277  | -2.441807 |
| C  | -1.337546 | 5.123413  | -1.616528 | H | 5.637791  | -0.657964 | -2.891255 |
| C  | -0.433255 | 4.048140  | -1.815145 | H | 4.147502  | -2.656226 | -2.703083 |
| C  | -0.559431 | 2.873851  | -1.011997 | H | 1.894006  | -2.379915 | -1.597919 |
| N  | 0.241104  | 1.780127  | -1.214919 | C | 0.578853  | 2.917884  | 0.413402  |
| C  | 1.199235  | 1.846603  | -2.128579 | C | -0.868810 | 3.288370  | 0.236700  |
| C  | 1.427513  | 2.984396  | -2.930528 | C | -1.717119 | 3.539472  | 1.337230  |
| C  | 0.600968  | 4.074905  | -2.784683 | C | -1.331267 | 3.502697  | -1.066204 |
| N  | -1.523307 | 1.678815  | 0.848581  | C | -3.009510 | 4.008201  | 1.078186  |
| H  | -3.013002 | 5.851059  | -0.504403 | C | -2.621017 | 3.982425  | -1.306020 |
| H  | -1.243936 | 6.010377  | -2.235578 | C | -3.462812 | 4.238080  | -0.225031 |
| H  | 0.728085  | 4.959998  | -3.401232 | H | -0.657621 | 3.307368  | -1.894638 |
| H  | 2.234803  | 2.973104  | -3.653634 | H | -3.678643 | 4.190517  | 1.915514  |
| H  | 1.821034  | 0.965396  | -2.232588 | H | -2.960106 | 4.151567  | -2.324024 |
| C  | -2.677395 | 1.048946  | 1.306503  | H | -4.471917 | 4.605813  | -0.389371 |
| C  | -2.373924 | -0.205807 | 2.053531  | O | 1.270658  | 3.539736  | 1.234274  |
| C  | -3.216016 | -0.686095 | 3.087542  | H | 2.836240  | 4.023605  | -0.503211 |
| C  | -1.269103 | -0.958389 | 1.653651  | C | -1.278508 | 3.258019  | 2.753075  |
| C  | -2.875123 | -1.904831 | 3.684563  | H | -2.096375 | 3.433391  | 3.457719  |
| C  | -0.944340 | -2.176821 | 2.229998  | H | -0.963255 | 2.213505  | 2.838839  |
| C  | -1.765422 | -2.644050 | 3.264336  | H | -0.425568 | 3.880327  | 3.032756  |
| H  | -0.685686 | 1.681429  | 1.499120  | C | -0.909313 | -2.719162 | -0.729590 |
| H  | -3.494494 | -2.285573 | 4.492227  | C | -1.459101 | -4.009207 | -0.695047 |
| H  | -0.100014 | -2.764150 | 1.883651  | C | -2.397877 | -4.430742 | -1.661510 |
| H  | -1.538530 | -3.593306 | 3.743873  | C | -2.819411 | -3.613462 | -2.691099 |
| O  | -3.811915 | 1.438126  | 1.042807  | C | -2.290599 | -2.301297 | -2.783253 |
| H  | -3.172957 | 3.839053  | 0.947998  | C | -1.345772 | -1.860421 | -1.807501 |
| C  | -4.438378 | 0.073030  | 3.547178  | N | -0.824510 | -0.603168 | -1.851698 |
| H  | -4.826155 | -0.348659 | 4.478423  | C | -1.169969 | 0.231450  | -2.818562 |
| H  | -4.217645 | 1.132245  | 3.708010  | C | -2.089978 | -0.120797 | -3.827660 |
| H  | -5.227076 | 0.034985  | 2.790379  | C | -2.649682 | -1.380164 | -3.801358 |
| Co | -0.083245 | -0.104071 | -0.164457 | N | -0.006228 | -2.142204 | 0.131483  |
| C  | 1.667222  | 1.360764  | 1.675384  | H | -2.798101 | -5.438568 | -1.582386 |
| O  | 1.496455  | 0.274885  | 1.003880  | H | -3.541008 | -3.953384 | -3.427855 |
| O  | 0.736371  | 2.027181  | 2.183489  | H | -3.369717 | -1.683495 | -4.556789 |
| C  | 3.124714  | 1.835613  | 1.838088  | H | -2.347585 | 0.598876  | -4.596990 |
| C  | 3.886458  | 0.778719  | 2.662498  | H | -0.713524 | 1.214944  | -2.781818 |
| H  | 4.933137  | 1.079566  | 2.783199  | C | 0.579376  | -2.807700 | 1.166046  |
| H  | 3.449066  | 0.666634  | 3.660936  | C | 1.505983  | -1.923949 | 1.959699  |
| H  | 3.860621  | -0.187831 | 2.160251  | C | 2.283952  | -2.385543 | 3.051977  |
| C  | 3.749255  | 1.947464  | 0.432745  | C | 1.578718  | -0.579401 | 1.605335  |
| H  | 3.226176  | 2.698404  | -0.170436 | C | 3.085918  | -1.450012 | 3.725216  |
| H  | 4.799471  | 2.250139  | 0.511102  | C | 2.361355  | 0.350467  | 2.272644  |
| H  | 3.700193  | 0.991337  | -0.089482 | C | 3.128347  | -0.104352 | 3.353925  |
| C  | 3.171931  | 3.194407  | 2.549940  | H | 3.688633  | -1.788417 | 4.564841  |
| H  | 4.211506  | 3.522947  | 2.658528  | H | 2.371683  | 1.396906  | 1.978719  |
| H  | 2.627124  | 3.954875  | 1.982621  | H | 3.755943  | 0.590217  | 3.908728  |
| H  | 2.721603  | 3.134996  | 3.544495  | O | 0.411960  | -4.008441 | 1.459411  |
|    |           |           |           | H | -1.152476 | -4.677182 | 0.095469  |
|    |           |           |           | C | 2.288881  | -3.822502 | 3.522578  |
|    |           |           |           | H | 2.978614  | -3.945511 | 4.363826  |
|    |           |           |           | H | 1.290271  | -4.142964 | 3.830552  |

C-q'

Energy = -2172.00195166 ZPE = -2171.356518 H =  
-2171.312556 G = -2171.433861

|    |           |           |           |   |           |           |           |
|----|-----------|-----------|-----------|---|-----------|-----------|-----------|
| H  | 2.583092  | -4.504435 | 2.720211  | C | 2.198122  | -0.989938 | -4.466911 |
| Co | 0.327192  | -0.014974 | -0.133452 | N | 1.819179  | -1.596131 | 0.322021  |
| C  | -2.044666 | -0.194866 | 1.708723  | H | 4.784502  | -4.105011 | -2.216020 |
| O  | -1.226944 | 0.487936  | 0.972611  | H | 4.067344  | -2.985105 | -4.306918 |
| O  | -1.738220 | -0.762794 | 2.765351  | H | 2.626598  | -1.231363 | -5.435238 |
| C  | -3.533834 | -0.219745 | 1.260239  | H | 0.938467  | 0.601013  | -5.187628 |
| C  | -4.331873 | 0.559795  | 2.326959  | H | 0.018530  | 1.093360  | -2.905630 |
| H  | -5.405743 | 0.521386  | 2.107743  | C | 2.572320  | -1.193654 | 1.448651  |
| H  | -4.161135 | 0.132116  | 3.318923  | C | 1.694508  | -0.489460 | 2.421240  |
| H  | -4.028319 | 1.612167  | 2.346449  | C | 1.951441  | -0.452230 | 3.811413  |
| C  | -3.745669 | 0.423955  | -0.115452 | C | 0.605937  | 0.213057  | 1.891132  |
| H  | -3.234019 | -0.140224 | -0.897506 | C | 1.066200  | 0.277347  | 4.611712  |
| H  | -4.815694 | 0.444962  | -0.358344 | C | -0.253774 | 0.961674  | 2.681741  |
| H  | -3.364008 | 1.445337  | -0.132756 | C | -0.014565 | 0.972904  | 4.061172  |
| C  | -4.001620 | -1.687559 | 1.234647  | H | 0.998331  | -2.233783 | 0.633281  |
| H  | -5.071346 | -1.744347 | 0.999177  | H | 1.228112  | 0.305892  | 5.685600  |
| H  | -3.455423 | -2.260556 | 0.477891  | H | -1.089554 | 1.505971  | 2.255105  |
| H  | -3.830391 | -2.159669 | 2.205588  | H | -0.681171 | 1.532176  | 4.712447  |

### C-t

Energy = -2172.50539983 ZPE = -2171.846139 H =  
-2171.802738 G = -2171.921189

|   |           |           |           |
|---|-----------|-----------|-----------|
| C | -0.489412 | 2.839223  | -0.283867 |
| C | -1.147662 | 4.074494  | -0.284972 |
| C | -0.434930 | 5.288875  | -0.246290 |
| C | 0.945500  | 5.328666  | -0.202103 |
| C | 1.664757  | 4.109561  | -0.177032 |
| C | 0.943811  | 2.875897  | -0.196248 |
| N | 1.594816  | 1.681023  | -0.133160 |
| C | 2.918766  | 1.638329  | -0.108445 |
| C | 3.706812  | 2.806006  | -0.128937 |
| C | 3.080367  | 4.033101  | -0.145958 |
| N | -1.070022 | 1.594112  | -0.455936 |
| H | -0.997646 | 6.218204  | -0.263401 |
| H | 1.485778  | 6.269861  | -0.191706 |
| H | 3.659720  | 4.952001  | -0.139381 |
| H | 4.787272  | 2.718962  | -0.115850 |
| H | 3.379919  | 0.659445  | -0.062040 |
| C | -2.413722 | 1.455497  | -0.112159 |
| C | -3.267773 | 0.579493  | -0.983755 |
| C | -4.665746 | 0.451530  | -0.769581 |
| C | -2.682820 | -0.094704 | -2.067508 |
| C | -5.398009 | -0.349673 | -1.660771 |
| C | -3.424879 | -0.889390 | -2.933089 |
| C | -4.799758 | -1.015722 | -2.728816 |
| H | -1.617744 | -0.006074 | -2.205507 |
| H | -6.468744 | -0.452350 | -1.505363 |
| H | -2.935102 | -1.403713 | -3.754773 |
| H | -5.403246 | -1.628051 | -3.392935 |
| O | -2.907659 | 2.047904  | 0.858578  |
| H | -2.229161 | 4.098065  | -0.325881 |
| C | -5.423940 | 1.123698  | 0.351839  |
| H | -6.488404 | 0.880352  | 0.283443  |
| H | -5.053335 | 0.809485  | 1.330738  |
| H | -5.304692 | 2.209328  | 0.321588  |
| C | 2.459557  | -2.018204 | -0.879975 |
| C | 3.441330  | -2.984890 | -0.944586 |
| C | 4.016986  | -3.338309 | -2.189529 |
| C | 3.619019  | -2.719994 | -3.354303 |
| C | 2.622294  | -1.709497 | -3.321178 |
| C | 2.027236  | -1.367665 | -2.070102 |
| N | 1.074860  | -0.387434 | -1.973882 |
| C | 0.737384  | 0.294410  | -3.058501 |
| C | 1.267710  | 0.017356  | -4.335785 |

|    |           |           |           |
|----|-----------|-----------|-----------|
| H  | 3.053877  | -1.177764 | 5.512711  |
| H  | 3.191864  | -2.206865 | 4.070415  |
| H  | 4.068646  | -0.691974 | 4.137318  |
| Co | 0.299432  | 0.071189  | -0.044658 |
| C  | -1.198688 | -2.299405 | 0.959454  |
| O  | -1.175140 | -1.219419 | 0.265625  |
| O  | -0.188204 | -3.008691 | 1.192338  |
| C  | -2.574607 | -2.705630 | 1.515047  |
| C  | -3.130665 | -1.513737 | 2.322436  |
| H  | -4.121730 | -1.761582 | 2.718315  |
| H  | -2.476495 | -1.271144 | 3.167209  |
| H  | -3.213425 | -0.624633 | 1.695842  |
| C  | -3.502735 | -3.004418 | 0.319626  |
| H  | -3.125891 | -3.849643 | -0.267557 |
| H  | -4.503683 | -3.264703 | 0.681393  |
| H  | -3.584573 | -2.136404 | -0.334629 |
| C  | -2.449200 | -3.943399 | 2.413573  |
| H  | -3.435113 | -4.224417 | 2.799640  |
| H  | -2.039080 | -4.792741 | 1.860191  |
| H  | -1.788891 | -3.748495 | 3.263878  |

### C-t'

Energy = -2172.03350728 ZPE = -2171.386271 H =  
-2171.342999 G = -2171.46199

|   |           |           |           |
|---|-----------|-----------|-----------|
| C | -2.807354 | 1.399019  | 0.631772  |
| C | -3.785251 | 2.379413  | 0.836813  |
| C | -5.115616 | 2.044187  | 1.159950  |
| C | -5.534095 | 0.733468  | 1.278723  |
| C | -4.593513 | -0.303782 | 1.069174  |
| C | -3.240601 | 0.030942  | 0.746287  |
| N | -2.314116 | -0.937107 | 0.523373  |
| C | -2.640980 | -2.214104 | 0.607331  |
| C | -3.947500 | -2.637202 | 0.934393  |
| C | -4.915388 | -1.683327 | 1.160486  |
| N | -1.450287 | 1.627867  | 0.431675  |
| H | -5.826750 | 2.850967  | 1.318074  |
| H | -6.561992 | 0.485285  | 1.525374  |
| H | -5.933504 | -1.971788 | 1.408277  |
| H | -4.169607 | -3.696986 | 0.998086  |
| H | -1.843385 | -2.921590 | 0.403330  |
| C | -1.060986 | 2.814449  | -0.138970 |
| C | 0.332103  | 3.287702  | 0.189290  |
| C | 1.224716  | 3.761108  | -0.797133 |



|    |           |           |           |
|----|-----------|-----------|-----------|
| C  | 0.688244  | 3.356609  | 1.540349  |
| C  | 2.461169  | 4.266637  | -0.378042 |
| C  | 1.921525  | 3.872818  | 1.942121  |
| C  | 2.816892  | 4.323920  | 0.972833  |
| H  | -0.019334 | 3.003376  | 2.282359  |
| H  | 3.164901  | 4.617086  | -1.129499 |
| H  | 2.176559  | 3.920572  | 2.997181  |
| H  | 3.784813  | 4.724870  | 1.261444  |
| O  | -1.781404 | 3.535654  | -0.854135 |
| H  | -3.512556 | 3.422110  | 0.746409  |
| C  | 0.925492  | 3.652048  | -2.273217 |
| H  | 1.601041  | 4.287646  | -2.854213 |
| H  | 1.076131  | 2.615548  | -2.596618 |
| H  | -0.105132 | 3.933485  | -2.491508 |
| C  | 1.128763  | -2.485180 | 0.859416  |
| C  | 1.918943  | -3.635965 | 0.922001  |
| C  | 2.552852  | -4.011821 | 2.128465  |
| C  | 2.418324  | -3.280666 | 3.290834  |
| C  | 1.620855  | -2.106356 | 3.280592  |
| C  | 0.990546  | -1.709823 | 2.065805  |
| N  | 0.232462  | -0.575688 | 1.994355  |
| C  | 0.036343  | 0.160349  | 3.073647  |
| C  | 0.611396  | -0.162872 | 4.321609  |
| C  | 1.405925  | -1.285229 | 4.417985  |
| N  | 0.440444  | -1.977669 | -0.223228 |
| H  | 3.163541  | -4.910844 | 2.129893  |
| H  | 2.908405  | -3.585531 | 4.210486  |
| H  | 1.871819  | -1.556649 | 5.361513  |
| H  | 0.426979  | 0.475171  | 5.178931  |
| H  | -0.593251 | 1.032129  | 2.935359  |
| C  | 0.386928  | -2.531774 | -1.474209 |
| C  | -0.430994 | -1.662744 | -2.376695 |
| C  | -0.753253 | -1.993101 | -3.712220 |
| C  | -0.876073 | -0.451464 | -1.824801 |
| C  | -1.528422 | -1.079856 | -4.440817 |
| C  | -1.657197 | 0.440814  | -2.550881 |
| C  | -1.975708 | 0.115955  | -3.874674 |
| H  | -1.788149 | -1.314255 | -5.470334 |
| H  | -1.996554 | 1.375135  | -2.117971 |
| H  | -2.575979 | 0.801639  | -4.468449 |
| O  | 0.922610  | -3.598108 | -1.820843 |
| H  | 2.037684  | -4.232244 | 0.029281  |
| C  | -0.296090 | -3.274224 | -4.370245 |
| H  | -0.672868 | -3.333303 | -5.395897 |
| H  | 0.795031  | -3.342826 | -4.388438 |
| H  | -0.639303 | -4.152296 | -3.816035 |
| Co | -0.338712 | -0.166794 | 0.016865  |
| C  | 2.327549  | 0.463833  | -1.250333 |
| O  | 1.452937  | 0.675988  | -0.330070 |
| O  | 2.120465  | 0.486374  | -2.475681 |
| C  | 3.777932  | 0.172296  | -0.765562 |
| C  | 4.711885  | 1.212947  | -1.412876 |
| H  | 5.759292  | 1.000475  | -1.166152 |
| H  | 4.596652  | 1.201204  | -2.499869 |
| H  | 4.475796  | 2.221742  | -1.055512 |
| C  | 3.908713  | 0.232412  | 0.762127  |
| H  | 3.258517  | -0.502927 | 1.241174  |
| H  | 4.944051  | 0.023678  | 1.060322  |
| H  | 3.634574  | 1.220130  | 1.142722  |
| C  | 4.145336  | -1.239881 | -1.267164 |
| H  | 5.176863  | -1.490774 | -0.990910 |
| H  | 3.482414  | -1.994929 | -0.831228 |
| H  | 4.051703  | -1.292318 | -2.355333 |

| <b>D</b>                                       |           |           |           |
|------------------------------------------------|-----------|-----------|-----------|
| Energy = -2172.50422707 ZPE = -2171.841816 H = |           |           |           |
| -2171.798871 G = -2171.915795                  |           |           |           |
| C                                              | -1.468511 | -2.149829 | 0.115242  |
| C                                              | -1.494778 | -2.718708 | 1.368677  |
| C                                              | -2.727437 | -2.923087 | 2.035600  |
| C                                              | -3.922405 | -2.553767 | 1.459852  |
| C                                              | -3.929782 | -1.970378 | 0.165940  |
| C                                              | -2.693462 | -1.784626 | -0.521518 |
| N                                              | -2.619657 | -1.251549 | -1.770626 |
| C                                              | -3.736596 | -0.864860 | -2.356984 |
| C                                              | -5.013732 | -0.983593 | -1.755322 |
| C                                              | -5.107422 | -1.542990 | -0.500628 |
| N                                              | -0.270016 | -1.810652 | -0.603409 |
| H                                              | -2.715193 | -3.369577 | 3.024565  |
| H                                              | -4.863082 | -2.699388 | 1.982281  |
| H                                              | -6.068988 | -1.658958 | -0.008755 |
| H                                              | -5.893708 | -0.640196 | -2.287983 |
| H                                              | -3.639665 | -0.435675 | -3.352142 |
| C                                              | 0.760526  | -2.846462 | -0.819123 |
| C                                              | 2.008783  | -2.235444 | -1.292377 |
| C                                              | 3.022335  | -2.992977 | -1.935718 |
| C                                              | 2.167309  | -0.859145 | -1.008743 |
| C                                              | 4.185903  | -2.318209 | -2.307043 |
| C                                              | 3.355942  | -0.226006 | -1.379952 |
| C                                              | 4.351707  | -0.953687 | -2.031697 |
| H                                              | 4.976549  | -2.863738 | -2.814759 |
| H                                              | 3.495190  | 0.826849  | -1.157792 |
| H                                              | 5.273641  | -0.460241 | -2.330516 |
| O                                              | 0.529828  | -4.015176 | -0.576907 |
| H                                              | -0.576374 | -2.997266 | 1.863399  |
| C                                              | 2.873532  | -4.467301 | -2.219934 |
| H                                              | 2.842680  | -5.043559 | -1.290345 |
| H                                              | 1.936652  | -4.683614 | -2.742836 |
| H                                              | 3.706162  | -4.828540 | -2.829162 |
| C                                              | 1.069817  | 2.693686  | -0.641573 |
| C                                              | 1.294108  | 4.065850  | -0.498423 |
| C                                              | 0.901785  | 4.968252  | -1.511690 |
| C                                              | 0.307528  | 4.545371  | -2.682476 |
| C                                              | 0.067581  | 3.160811  | -2.874666 |
| C                                              | 0.423072  | 2.245125  | -1.840739 |
| N                                              | 0.189675  | 0.900204  | -1.954341 |
| C                                              | -0.301771 | 0.430372  | -3.090788 |
| C                                              | -0.662247 | 1.258037  | -4.174151 |
| C                                              | -0.497778 | 2.619705  | -4.056861 |
| N                                              | 1.410826  | 1.677357  | 0.231288  |
| H                                              | 1.090898  | 6.027250  | -1.358449 |
| H                                              | 0.028568  | 5.247605  | -3.461949 |
| H                                              | -0.780461 | 3.288195  | -4.865209 |
| H                                              | -1.068734 | 0.808858  | -5.073289 |
| H                                              | -0.439318 | -0.640715 | -3.171593 |
| C                                              | 1.966430  | 1.863244  | 1.467834  |
| C                                              | 2.104765  | 0.556335  | 2.178113  |
| C                                              | 2.777341  | 0.422705  | 3.414584  |
| C                                              | 1.533662  | -0.551479 | 1.503012  |
| C                                              | 2.892513  | -0.864668 | 3.955878  |
| C                                              | 1.716977  | -1.821746 | 2.067771  |
| C                                              | 2.381162  | -1.976453 | 3.287465  |
| H                                              | 3.403763  | -0.995336 | 4.906208  |
| H                                              | 1.375390  | -2.713789 | 1.556420  |
| H                                              | 2.506460  | -2.968954 | 3.713081  |
| O                                              | 2.315342  | 2.957153  | 1.943273  |
| H                                              | 1.779786  | 4.423194  | 0.396703  |
| C                                              | 3.376096  | 1.590880  | 4.162835  |

|    |           |           |           |   |           |           |           |
|----|-----------|-----------|-----------|---|-----------|-----------|-----------|
| H  | 3.865024  | 1.246357  | 5.078886  | C | -0.815058 | -1.376925 | -1.708493 |
| H  | 4.106301  | 2.124685  | 3.548841  | N | -0.604956 | -0.106355 | -1.248263 |
| H  | 2.612357  | 2.328227  | 4.424063  | C | -1.356359 | 0.888447  | -1.689417 |
| Co | 0.689500  | -0.037471 | -0.172940 | C | -2.391164 | 0.689767  | -2.629453 |
| H  | -0.613701 | -1.523886 | -1.529374 | C | -2.640924 | -0.582808 | -3.093759 |
| C  | -2.844334 | 1.741167  | 1.911640  | N | 1.034686  | -1.926615 | -0.351313 |
| C  | -3.561970 | 2.024970  | 0.583242  | H | -1.331262 | -5.025882 | -2.874393 |
| H  | -3.917146 | 1.100175  | 0.120339  | H | -2.826018 | -3.255959 | -3.758500 |
| H  | -4.425354 | 2.671118  | 0.767646  | H | -3.438028 | -0.767303 | -3.808934 |
| H  | -2.896231 | 2.524693  | -0.124745 | H | -2.981582 | 1.537657  | -2.958358 |
| C  | -2.319378 | 3.062212  | 2.528434  | H | -1.145063 | 1.866317  | -1.272564 |
| H  | -3.163304 | 3.731830  | 2.719844  | C | 2.002203  | -2.671794 | 0.266864  |
| H  | -1.800989 | 2.877075  | 3.473098  | C | 2.830468  | -1.797428 | 1.156506  |
| H  | -1.628182 | 3.566329  | 1.844765  | C | 3.939788  | -2.267204 | 1.898040  |
| C  | -3.789371 | 1.028785  | 2.899165  | C | 2.423502  | -0.443185 | 1.211822  |
| H  | -4.142420 | 0.078564  | 2.487355  | C | 4.630993  | -1.343304 | 2.693983  |
| H  | -3.292052 | 0.827288  | 3.850672  | C | 3.140137  | 0.446946  | 2.017916  |
| H  | -4.658593 | 1.665356  | 3.090098  | C | 4.239320  | -0.002169 | 2.754544  |
| C  | -1.615081 | 0.886359  | 1.647462  | H | 5.488183  | -1.680735 | 3.272606  |
| O  | -1.150274 | 0.732309  | 0.517860  | H | 2.836711  | 1.489289  | 2.068865  |
| O  | -1.057300 | 0.364101  | 2.730798  | H | 4.796966  | 0.690779  | 3.382171  |
| H  | -0.225882 | -0.093838 | 2.465391  | O | 2.176209  | -3.897465 | 0.116614  |

#### D'

Energy = -2172.05573653 ZPE = -2171.406846 H =  
-2171.364093 G = -2171.48205

|   |           |           |           |
|---|-----------|-----------|-----------|
| C | 1.523298  | 2.644319  | -0.382461 |
| C | 1.617566  | 4.040191  | -0.359130 |
| C | 2.427100  | 4.718302  | -1.296862 |
| C | 3.152773  | 4.055118  | -2.268291 |
| C | 3.087669  | 2.639218  | -2.334546 |
| C | 2.274955  | 1.945009  | -1.392754 |
| N | 2.167820  | 0.582279  | -1.403048 |
| C | 2.829057  | -0.125529 | -2.303573 |
| C | 3.657308  | 0.478867  | -3.274606 |
| C | 3.785253  | 1.851243  | -3.288048 |
| N | 0.799083  | 1.813012  | 0.439759  |
| H | 2.475117  | 5.803146  | -1.244706 |
| H | 3.769133  | 4.595696  | -2.980327 |
| H | 4.416431  | 2.343837  | -4.022814 |
| H | 4.179326  | -0.143539 | -3.993446 |
| H | 2.697385  | -1.201470 | -2.248698 |
| C | -0.037131 | 2.203563  | 1.448587  |
| C | -0.617644 | 0.998718  | 2.127141  |
| C | -1.524145 | 1.075078  | 3.211902  |
| C | -0.184957 | -0.246580 | 1.605912  |
| C | -1.956230 | -0.128273 | 3.786071  |
| C | -0.642958 | -1.424107 | 2.212813  |
| C | -1.516416 | -1.363488 | 3.301434  |
| H | -2.313851 | -0.202155 | 0.861118  |
| H | -2.654518 | -0.094729 | 4.619145  |
| H | -0.325832 | -2.387549 | 1.824292  |
| H | -1.872545 | -2.279979 | 3.767529  |
| O | -0.281485 | 3.382134  | 1.770558  |
| H | 1.059604  | 4.585577  | 0.388114  |
| C | -2.064802 | 2.382022  | 3.741517  |
| H | -1.262369 | 3.055337  | 4.051771  |
| H | -2.617195 | 2.909764  | 2.958634  |
| H | -2.735426 | 2.205755  | 4.588691  |
| C | 0.069460  | -2.398614 | -1.210161 |
| C | -0.148514 | -3.708917 | -1.652415 |
| C | -1.193586 | -3.994972 | -2.557788 |
| C | -2.034062 | -3.016635 | -3.055159 |
| C | -1.852017 | -1.673125 | -2.638784 |

|    |           |           |           |
|----|-----------|-----------|-----------|
| C  | -0.815058 | -1.376925 | -1.708493 |
| N  | -0.604956 | -0.106355 | -1.248263 |
| C  | -1.356359 | 0.888447  | -1.689417 |
| C  | -2.391164 | 0.689767  | -2.629453 |
| C  | -2.640924 | -0.582808 | -3.093759 |
| N  | 1.034686  | -1.926615 | -0.351313 |
| H  | -1.331262 | -5.025882 | -2.874393 |
| H  | -2.826018 | -3.255959 | -3.758500 |
| H  | -3.438028 | -0.767303 | -3.808934 |
| H  | -2.981582 | 1.537657  | -2.958358 |
| H  | -1.145063 | 1.866317  | -1.272564 |
| C  | 2.002203  | -2.671794 | 0.266864  |
| C  | 2.830468  | -1.797428 | 1.156506  |
| C  | 3.939788  | -2.267204 | 1.898040  |
| C  | 2.423502  | -0.443185 | 1.211822  |
| C  | 4.630993  | -1.343304 | 2.693983  |
| C  | 3.140137  | 0.446946  | 2.017916  |
| C  | 4.239320  | -0.002169 | 2.754544  |
| H  | 5.488183  | -1.680735 | 3.272606  |
| H  | 2.836711  | 1.489289  | 2.068865  |
| H  | 4.796966  | 0.690779  | 3.382171  |
| O  | 2.176209  | -3.897465 | 0.116614  |
| H  | 0.501115  | -4.492786 | -1.291085 |
| C  | 4.404127  | -3.706099 | 1.867327  |
| H  | 5.287460  | -3.838279 | 2.500564  |
| H  | 3.618420  | -4.385091 | 2.210787  |
| H  | 4.646394  | -4.027610 | 0.850338  |
| Co | 0.942406  | -0.061772 | 0.075782  |
| C  | -3.986740 | 0.528074  | 0.317076  |
| O  | -3.192779 | -0.521558 | 0.568753  |
| O  | -3.618243 | 1.684708  | 0.432051  |
| C  | -5.413493 | 0.122389  | -0.064982 |
| C  | -5.957319 | 1.140005  | -1.082198 |
| H  | -7.009444 | 0.927662  | -1.296996 |
| H  | -5.874428 | 2.158072  | -0.695103 |
| H  | -5.398664 | 1.086382  | -2.022225 |
| C  | -5.474549 | -1.299887 | -0.646855 |
| H  | -5.135717 | -2.042809 | 0.078804  |
| H  | -6.506291 | -1.536308 | -0.927756 |
| H  | -4.846231 | -1.388079 | -1.537708 |
| C  | -6.236104 | 0.193285  | 1.243962  |
| H  | -7.278789 | -0.072700 | 1.041107  |
| H  | -5.843646 | -0.503242 | 1.992045  |
| H  | -6.211174 | 1.202898  | 1.665092  |

#### D'-AQBr

Energy = -2197.17598093 ZPE = -2196.547882 H =  
-2196.501956 G = -2196.628048

|   |          |           |           |
|---|----------|-----------|-----------|
| C | 1.875071 | -0.036725 | -2.201832 |
| C | 2.231292 | -0.318443 | -3.525223 |
| C | 3.244343 | -1.256935 | -3.802635 |
| C | 3.927028 | -1.937316 | -2.811282 |
| C | 3.604406 | -1.690657 | -1.454347 |
| C | 2.576755 | -0.739280 | -1.155042 |
| N | 2.202565 | -0.445132 | 0.123747  |
| C | 2.793689 | -1.042606 | 1.142319  |
| C | 3.819058 | -1.994673 | 0.964153  |
| C | 4.203652 | -2.299856 | -0.319406 |
| N | 0.923362 | 0.836583  | -1.736146 |
| H | 3.496666 | -1.450748 | -4.841814 |
| H | 4.701410 | -2.653098 | -3.057526 |
| H | 4.279290 | -2.463392 | 1.824783  |
| H | 2.448592 | -0.760881 | 2.131507  |
| C | 0.088087 | 1.604966  | -2.504433 |

|    |           |           |           |                           |                |              |                  |
|----|-----------|-----------|-----------|---------------------------|----------------|--------------|------------------|
| C  | -0.786538 | 2.445489  | -1.624572 | Br                        | 5.639770       | -3.634367    | -0.557569        |
| C  | -1.771653 | 3.332051  | -2.123368 | Br                        | -3.924264      | -3.857502    | 1.170726         |
| C  | -0.558606 | 2.293465  | -0.234200 |                           |                |              |                  |
| C  | -2.492350 | 4.093381  | -1.193796 | <b>D<sup>2</sup>-AQCI</b> |                |              |                  |
| C  | -1.301175 | 3.078053  | 0.658494  | Energy =                  | -3091.24231211 | ZPE =        | -3090.612924 H = |
| C  | -2.256265 | 3.977682  | 0.179197  | -3090.567525              | G =            | -3090.691588 |                  |
| H  | -2.518745 | 1.239468  | -0.505556 | C                         | -1.823143      | 0.795036     | -2.212549        |
| H  | -3.257202 | 4.778017  | -1.552528 | C                         | -2.094707      | 1.256467     | -3.505346        |
| H  | -1.142399 | 2.975113  | 1.727773  | C                         | -3.030243      | 2.290177     | -3.708801        |
| H  | -2.834501 | 4.581606  | 0.875380  | C                         | -3.715383      | 2.894523     | -2.670629        |
| O  | 0.060084  | 1.617535  | -3.748204 | C                         | -3.473719      | 2.464568     | -1.342897        |
| H  | 1.715319  | 0.195484  | -4.322777 | C                         | -2.528299      | 1.416478     | -1.118519        |
| C  | -2.101016 | 3.452585  | -3.591919 | N                         | -2.238500      | 0.948483     | 0.130719         |
| H  | -1.225226 | 3.733880  | -4.181407 | C                         | -2.843366      | 1.463424     | 1.186439         |
| H  | -2.435936 | 2.487894  | -3.983869 | C                         | -3.792443      | 2.499458     | 1.079627         |
| H  | -2.892731 | 4.192227  | -3.748191 | C                         | -4.095300      | 2.986160     | -0.172539        |
| C  | -0.478030 | 0.140896  | 2.566419  | N                         | -0.955326      | -0.193328    | -1.817330        |
| C  | -0.923393 | 0.016927  | 3.887720  | H                         | -3.217390      | 2.622430     | -4.726553        |
| C  | -1.925441 | -0.916814 | 4.215124  | H                         | -4.429119      | 3.687076     | -2.859155        |
| C  | -2.503050 | -1.754778 | 3.278771  | H                         | -4.267187      | 2.898534     | 1.967587         |
| C  | -2.084773 | -1.674618 | 1.928561  | H                         | -2.570054      | 1.042136     | 2.147996         |
| C  | -1.087369 | -0.710527 | 1.574162  | C                         | -0.130268      | -0.918163    | -2.636403        |
| N  | -0.651153 | -0.548262 | 0.290782  | C                         | 0.640029       | -1.919314    | -1.830019        |
| C  | -1.118915 | -1.322074 | -0.671403 | C                         | 1.581687       | -2.814765    | -2.392388        |
| C  | -2.080800 | -2.325452 | -0.430008 | C                         | 0.353703       | -1.916388    | -0.441878        |
| C  | -2.552731 | -2.474081 | 0.850817  | C                         | 2.199062       | -3.733808    | -1.533340        |
| N  | 0.487935  | 0.977094  | 2.062324  | C                         | 0.993732       | -2.855080    | 0.378424         |
| H  | -2.250467 | -0.982497 | 5.250097  | C                         | 1.904536       | -3.762910    | -0.167236        |
| H  | -3.263569 | -2.471011 | 3.563608  | H                         | 2.408313       | -1.004380    | -0.441540        |
| H  | -2.437971 | -2.938631 | -1.247160 | H                         | 2.927534       | -4.430259    | -1.941658        |
| H  | -0.743606 | -1.136130 | -1.670312 | H                         | 0.789533       | -2.866146    | 1.444922         |
| C  | 1.220923  | 1.889758  | 2.777789  | H                         | 2.402894       | -4.487478    | 0.473365         |
| C  | 2.118984  | 2.656301  | 1.858759  | O                         | -0.032810      | -0.778318    | -3.869258        |
| C  | 3.038919  | 3.634753  | 2.304169  | H                         | -1.573784      | 0.806250     | -4.337482        |
| C  | 1.983548  | 2.339261  | 0.486774  | C                         | 1.966904       | -2.794993    | -3.852674        |
| C  | 3.817631  | 4.284755  | 1.337123  | H                         | 1.098434       | -2.931074    | -4.501553        |
| C  | 2.777575  | 3.011496  | -0.447062 | H                         | 2.396694       | -1.825670    | -4.121597        |
| C  | 3.691054  | 3.979488  | -0.021797 | H                         | 2.701783       | -3.577647    | -4.066323        |
| H  | 4.533178  | 5.039941  | 1.654672  | C                         | 0.271814       | -0.101727    | 2.593481         |
| H  | 2.679808  | 2.779196  | -1.504026 | C                         | 0.654937       | -0.157482    | 3.939047         |
| H  | 4.309922  | 4.503213  | -0.748067 | C                         | 1.697505       | 0.660685     | 4.416447         |
| O  | 1.152976  | 2.060857  | 4.009609  | C                         | 2.377651       | 1.554653     | 3.609184         |
| H  | -0.480995 | 0.646814  | 4.645362  | C                         | 2.023735       | 1.652747     | 2.241835         |
| C  | 3.214793  | 3.999449  | 3.760747  | C                         | 0.985448       | 0.811555     | 1.735384         |
| H  | 3.992714  | 4.761165  | 3.874893  | N                         | 0.607485       | 0.827730     | 0.422988         |
| H  | 2.283649  | 4.377305  | 4.192442  | C                         | 1.182410       | 1.666436     | -0.420153        |
| H  | 3.484330  | 3.126001  | 4.361361  | C                         | 2.197487       | 2.558461     | -0.020881        |
| Co | 0.730244  | 0.942333  | 0.164595  | C                         | 2.611942       | 2.535253     | 1.290788         |
| C  | -3.910098 | 0.295001  | -1.394464 | N                         | -0.717074      | -0.807427    | 1.952360         |
| O  | -3.417226 | 0.902675  | -0.306497 | H                         | 1.970700       | 0.586654     | 5.465809         |
| O  | -3.278273 | 0.172520  | -2.430650 | H                         | 3.168236       | 2.178195     | 4.008251         |
| C  | -5.357522 | -0.174416 | -1.221562 | H                         | 2.647369       | 3.228288     | -0.742683        |
| C  | -5.523187 | -1.526139 | -1.938542 | H                         | 0.849160       | 1.621957     | -1.449798        |
| H  | -6.575400 | -1.827783 | -1.925404 | C                         | -1.538440      | -1.747190    | 2.521140         |
| H  | -5.188404 | -1.458194 | -2.976093 | C                         | -2.436912      | -2.337418    | 1.480167         |
| H  | -4.941899 | -2.307267 | -1.438709 | C                         | -3.434477      | -3.299016    | 1.766362         |
| C  | -5.754992 | -0.302080 | 0.258223  | C                         | -2.218678      | -1.867923    | 0.163601         |
| H  | -5.685746 | 0.658402  | 0.774173  | C                         | -4.208593      | -3.772872    | 0.698448         |
| H  | -6.787833 | -0.658795 | 0.329382  | C                         | -3.012475      | -2.365180    | -0.874404        |
| H  | -5.111634 | -1.015126 | 0.780220  | C                         | -4.003563      | -3.312948    | -0.606234        |
| C  | -6.231087 | 0.898768  | -1.914384 | H                         | -4.982549      | -4.511839    | 0.893607         |
| H  | -7.287057 | 0.617629  | -1.845737 | H                         | -2.854613      | -2.011770    | -1.889831        |
| H  | -6.104950 | 1.876273  | -1.437163 | H                         | -4.621926      | -3.700309    | -1.413932        |
| H  | -5.964267 | 0.993335  | -2.971136 | O                         | -1.541233      | -2.067219    | 3.724992         |

|    |           |           |           |   |           |           |           |
|----|-----------|-----------|-----------|---|-----------|-----------|-----------|
| H  | 0.134155  | -0.835378 | 4.599224  | C | 1.932546  | 1.136839  | 2.727712  |
| C  | -3.695465 | -3.827810 | 3.158578  | C | 0.905697  | 0.474815  | 1.994637  |
| H  | -4.516853 | -4.551430 | 3.147124  | N | 0.615187  | 0.801116  | 0.698139  |
| H  | -2.805532 | -4.308458 | 3.574670  | C | 1.279259  | 1.779976  | 0.110065  |
| H  | -3.945532 | -3.020565 | 3.853028  | C | 2.288476  | 2.507193  | 0.771927  |
| Co | -0.863250 | -0.534640 | 0.063438  | C | 2.636857  | 2.199323  | 2.073200  |
| C  | 3.935845  | -0.064900 | -1.080266 | N | -0.875636 | -1.055451 | 1.746541  |
| O  | 3.305375  | -0.766254 | -0.128143 | H | 1.629069  | -0.620829 | 5.628013  |
| O  | 3.412533  | 0.236394  | -2.139754 | H | 2.969748  | 1.191013  | 4.640290  |
| C  | 5.388557  | 0.263199  | -0.723639 | H | 2.794814  | 3.305148  | 0.238765  |
| C  | 5.721248  | 1.666202  | -1.261376 | H | 1.015672  | 1.985638  | -0.921025 |
| H  | 6.785646  | 1.877280  | -1.117327 | C | -1.779637 | -2.038955 | 2.045687  |
| H  | 5.488202  | 1.738436  | -2.326156 | C | -2.653712 | -2.308624 | 0.860103  |
| H  | 5.149218  | 2.434399  | -0.731531 | C | -3.717535 | -3.241073 | 0.871259  |
| C  | 5.644706  | 0.194310  | 0.791240  | C | -2.340010 | -1.558051 | -0.297797 |
| H  | 5.464947  | -0.810747 | 1.179702  | C | -4.457970 | -3.400936 | -0.308153 |
| H  | 6.685571  | 0.464218  | 0.998006  | C | -3.103297 | -1.747235 | -1.454408 |
| H  | 4.997925  | 0.887488  | 1.335589  | C | -4.157952 | -2.663759 | -1.458191 |
| C  | 6.248132  | -0.797334 | -1.452753 | H | -5.281130 | -4.112028 | -0.323370 |
| H  | 7.309273  | -0.613205 | -1.255506 | H | -2.870747 | -1.177745 | -2.350433 |
| H  | 6.004668  | -1.806537 | -1.104422 | H | -4.751765 | -2.810705 | -2.358716 |
| H  | 6.083086  | -0.755321 | -2.533452 | O | -1.870810 | -2.629342 | 3.140539  |
| Cl | -5.275944 | 4.280483  | -0.313081 | H | -0.197380 | -1.721719 | 4.360045  |
| Cl | 3.897614  | 3.625968  | 1.788571  | C | -4.084890 | -4.060500 | 2.087987  |

#### D<sup>+</sup>-AQMe

Energy = -2250.70581691 ZPE = -2250.001209 H =

-2249.955209 G = -2250.079246

|   |           |           |           |
|---|-----------|-----------|-----------|
| C | -1.666647 | 1.557849  | -1.953266 |
| C | -1.844337 | 2.328789  | -3.107287 |
| C | -2.707750 | 3.443063  | -3.089343 |
| C | -3.405815 | 3.825764  | -1.958238 |
| C | -3.257224 | 3.080199  | -0.759182 |
| C | -2.387510 | 1.951848  | -0.769003 |
| N | -2.185745 | 1.182395  | 0.343391  |
| C | -2.810941 | 1.486282  | 1.466611  |
| C | -3.689606 | 2.583858  | 1.564623  |
| C | -3.928410 | 3.391176  | 0.467741  |
| N | -0.879293 | 0.443607  | -1.777163 |
| H | -2.824672 | 4.019066  | -4.004026 |
| H | -4.060593 | 4.689328  | -1.984511 |
| H | -4.176227 | 2.786095  | 2.513762  |
| H | -2.608065 | 0.837228  | 2.312642  |
| C | -0.052143 | -0.116080 | -2.711074 |
| C | 0.615524  | -1.332310 | -2.140967 |
| C | 1.533238  | -2.131165 | -2.866420 |
| C | 0.253720  | -1.641678 | -0.805707 |
| C | 2.048571  | -3.269461 | -2.232357 |
| C | 0.793590  | -2.791675 | -0.213462 |
| C | 1.678661  | -3.603472 | -0.926008 |
| H | 2.344019  | -0.845236 | -0.588773 |
| H | 2.757214  | -3.896736 | -2.768175 |
| H | 0.530234  | -3.043511 | 0.809737  |
| H | 2.098309  | -4.493441 | -0.461214 |
| O | 0.123123  | 0.306093  | -3.870299 |
| H | -1.309431 | 2.053856  | -4.004655 |
| C | 2.001963  | -1.786884 | -4.260302 |
| H | 1.165380  | -1.688585 | -4.955918 |
| H | 2.512448  | -0.819250 | -4.260811 |
| H | 2.693342  | -2.549726 | -4.632591 |
| C | 0.101839  | -0.567103 | 2.582502  |
| C | 0.391621  | -0.941852 | 3.899878  |
| C | 1.428676  | -0.301938 | 4.608059  |
| C | 2.188062  | 0.715696  | 4.058807  |

|    |           |           |           |
|----|-----------|-----------|-----------|
| C  | 1.932546  | 1.136839  | 2.727712  |
| C  | 0.905697  | 0.474815  | 1.994637  |
| N  | 0.615187  | 0.801116  | 0.698139  |
| C  | 1.279259  | 1.779976  | 0.110065  |
| C  | 2.288476  | 2.507193  | 0.771927  |
| C  | 2.636857  | 2.199323  | 2.073200  |
| N  | -0.875636 | -1.055451 | 1.746541  |
| H  | 1.629069  | -0.620829 | 5.628013  |
| H  | 2.969748  | 1.191013  | 4.640290  |
| H  | 2.794814  | 3.305148  | 0.238765  |
| H  | 1.015672  | 1.985638  | -0.921025 |
| C  | -1.779637 | -2.038955 | 2.045687  |
| C  | -2.653712 | -2.308624 | 0.860103  |
| C  | -3.717535 | -3.241073 | 0.871259  |
| C  | -2.340010 | -1.558051 | -0.297797 |
| C  | -4.457970 | -3.400936 | -0.308153 |
| C  | -3.103297 | -1.747235 | -1.454408 |
| C  | -4.157952 | -2.663759 | -1.458191 |
| H  | -5.281130 | -4.112028 | -0.323370 |
| H  | -2.870747 | -1.177745 | -2.350433 |
| H  | -4.751765 | -2.810705 | -2.358716 |
| O  | -1.870810 | -2.629342 | 3.140539  |
| H  | -0.197380 | -1.721719 | 4.360045  |
| C  | -4.084890 | -4.060500 | 2.087987  |
| H  | -4.943350 | -4.704923 | 1.872272  |
| H  | -3.248197 | -4.683143 | 2.416978  |
| H  | -4.328320 | -3.421107 | 2.941398  |
| Co | -0.903099 | -0.336539 | -0.027899 |
| C  | 3.960628  | 0.108633  | -0.906298 |
| O  | 3.230214  | -0.747921 | -0.181629 |
| O  | 3.540455  | 0.661039  | -1.909370 |
| C  | 5.388885  | 0.280706  | -0.378274 |
| C  | 5.774599  | 1.766626  | -0.491221 |
| H  | 6.827454  | 1.899829  | -0.222735 |
| H  | 5.620925  | 2.129232  | -1.510169 |
| H  | 5.170132  | 2.379270  | 0.184358  |
| C  | 5.530871  | -0.200228 | 1.075049  |
| H  | 5.330253  | -1.270775 | 1.162206  |
| H  | 6.550170  | -0.009991 | 1.426893  |
| H  | 4.833402  | 0.324192  | 1.733545  |
| C  | 6.291375  | -0.565463 | -1.307037 |
| H  | 7.336721  | -0.470570 | -0.995205 |
| H  | 6.016419  | -1.624624 | -1.264172 |
| H  | 6.205414  | -0.227857 | -2.343983 |
| C  | -4.865191 | 4.566269  | 0.552956  |
| H  | -4.345677 | 5.501011  | 0.313029  |
| H  | -5.686990 | 4.465754  | -0.165081 |
| H  | -5.293549 | 4.659244  | 1.553428  |
| C  | 3.719024  | 2.960873  | 2.791149  |
| H  | 3.332795  | 3.421967  | 3.707025  |
| H  | 4.538458  | 2.297150  | 3.089529  |
| H  | 4.133282  | 3.749385  | 2.158900  |

#### D<sup>+</sup>-AQN<sub>2</sub>

Energy = -2282.79333008 ZPE = -2282.110596 H =

|              |                 |          |           |
|--------------|-----------------|----------|-----------|
| -2282.064968 | G = -2282.18842 |          |           |
| C            | -1.680939       | 1.902502 | -1.631781 |
| C            | -1.841054       | 2.877842 | -2.622210 |
| C            | -2.693074       | 3.978581 | -2.403449 |
| C            | -3.405364       | 4.139024 | -1.229129 |
| C            | -3.287139       | 3.167787 | -0.200605 |
| C            | -2.417816       | 2.061889 | -0.402829 |
| N            | -2.222821       | 1.094055 | 0.545625  |
| C            | -2.870255       | 1.186202 | 1.696378  |



|    |           |           |           |   |           |           |           |
|----|-----------|-----------|-----------|---|-----------|-----------|-----------|
| H  | 0.936438  | 2.225257  | -0.383490 | C | -1.542930 | 2.774461  | 0.893333  |
| C  | -1.756898 | -2.483555 | 1.491054  | H | -2.472882 | 0.078730  | 0.399408  |
| C  | -2.613408 | -2.490624 | 0.262062  | H | -0.227505 | 1.523716  | 2.035743  |
| C  | -3.647664 | -3.429591 | 0.037923  | H | -1.780724 | 3.430549  | 1.723669  |
| C  | -2.313192 | -1.479964 | -0.682213 | O | -0.900345 | 0.268298  | -3.555759 |
| C  | -4.372359 | -3.328964 | -1.157765 | H | 0.171884  | -1.450102 | -4.566052 |
| C  | -3.060258 | -1.414209 | -1.863084 | C | -2.578729 | 2.379433  | -2.799134 |
| C  | -4.085000 | -2.334576 | -2.098391 | H | -1.853560 | 2.536073  | -3.599527 |
| H  | -5.173212 | -4.039027 | -1.352563 | H | -3.131870 | 1.473040  | -3.055924 |
| H  | -2.838180 | -0.643253 | -2.596602 | H | -3.268468 | 3.221965  | -2.765432 |
| H  | -4.666230 | -2.283031 | -3.017515 | C | 0.113777  | -1.396016 | 2.673923  |
| O  | -1.834090 | -3.322223 | 2.411571  | C | 0.066964  | -1.505402 | 4.067729  |
| H  | -0.174091 | -2.702381 | 3.816310  | C | -0.962979 | -2.241496 | 4.694295  |
| C  | -4.000137 | -4.520874 | 1.023712  | C | -1.953352 | -2.887140 | 3.979148  |
| H  | -4.838158 | -5.119343 | 0.651692  | C | -1.946379 | -2.808826 | 2.562879  |
| H  | -3.148204 | -5.180877 | 1.209753  | C | -0.922192 | -2.054561 | 1.922791  |
| H  | -4.268244 | -4.106379 | 1.999856  | N | -0.871872 | -1.924331 | 0.561576  |
| Co | -0.926999 | -0.309510 | -0.105636 | C | -1.770374 | -2.534129 | -0.194461 |
| C  | 3.997371  | 0.394966  | -0.751303 | C | -2.809233 | -3.316007 | 0.355797  |
| O  | 3.271075  | -0.593391 | -0.209559 | C | -2.901452 | -3.442299 | 1.724092  |
| O  | 3.543960  | 1.192589  | -1.553642 | N | 1.034175  | -0.734852 | 1.888993  |
| C  | 5.460820  | 0.355275  | -0.303056 | H | -0.965525 | -2.299736 | 5.779735  |
| C  | 6.098736  | 1.730188  | -0.549218 | H | -2.732392 | -3.454613 | 4.479177  |
| H  | 7.161705  | 1.699978  | -0.289558 | H | -3.699707 | -4.024532 | 2.176150  |
| H  | 6.000495  | 2.026582  | -1.596071 | H | -3.528239 | -3.787023 | -0.305212 |
| H  | 5.617275  | 2.498315  | 0.065160  | H | -1.681545 | -2.374378 | -1.262231 |
| C  | 5.587977  | -0.034283 | 1.181713  | C | 2.107142  | -0.019075 | 2.340253  |
| H  | 5.131253  | -1.006392 | 1.379414  | C | 2.829205  | 0.603830  | 1.176231  |
| H  | 6.647657  | -0.089024 | 1.453128  | C | 4.017140  | 1.369651  | 1.327467  |
| H  | 5.110584  | 0.703743  | 1.832125  | C | 2.227875  | 0.371643  | -0.080197 |
| C  | 6.145215  | -0.717435 | -1.184982 | C | 4.550572  | 1.880985  | 0.138934  |
| H  | 7.205461  | -0.792107 | -0.921581 | C | 2.821299  | 0.915245  | -1.222331 |
| H  | 5.681535  | -1.697377 | -1.037665 | C | 3.987096  | 1.673204  | -1.119435 |
| H  | 6.072325  | -0.457516 | -2.246036 | H | 2.376417  | 0.749984  | -2.199223 |
| O  | -4.900810 | 4.124867  | 1.459172  | H | 4.453275  | 2.098273  | -2.002167 |
| H  | -5.306914 | 4.015629  | 2.330847  | O | 2.440315  | 0.106716  | 3.533476  |
| O  | 3.585247  | 2.091256  | 3.343457  | H | 0.833524  | -1.019299 | 4.653263  |
| H  | 3.991958  | 2.890531  | 2.978898  | C | 4.645810  | 1.603125  | 2.680554  |

#### D<sup>+</sup>-ArBr

Energy = -2197.1810963 ZPE = -2196.553199 H = -2196.506945 G = -2196.63485

|   |           |           |           |
|---|-----------|-----------|-----------|
| C | 0.873254  | -1.804852 | -2.576050 |
| C | 0.776906  | -2.090934 | -3.941492 |
| C | 1.459113  | -3.199914 | -4.489738 |
| C | 2.240286  | -4.043107 | -3.723299 |
| C | 2.369094  | -3.793848 | -2.332416 |
| C | 1.686107  | -2.677584 | -1.770049 |
| N | 1.768732  | -2.382654 | -0.437572 |
| C | 2.496763  | -3.142260 | 0.363858  |
| C | 3.206489  | -4.268039 | -0.107903 |
| C | 3.142498  | -4.589666 | -1.446621 |
| N | 0.285805  | -0.783719 | -1.861532 |
| H | 1.359481  | -3.388615 | -5.555589 |
| H | 2.756481  | -4.890497 | -4.164239 |
| H | 3.679062  | -5.449746 | -1.837954 |
| H | 3.789837  | -4.861326 | 0.587871  |
| H | 2.516421  | -2.846005 | 1.407697  |
| C | -0.547036 | 0.173783  | -2.366999 |
| C | -0.963004 | 1.117625  | -1.269107 |
| C | -1.885614 | 2.179972  | -1.474667 |
| C | -0.374909 | 0.849563  | -0.011501 |
| C | -2.134576 | 2.977381  | -0.352140 |
| C | -0.667095 | 1.702776  | 1.059529  |

|    |           |           |           |
|----|-----------|-----------|-----------|
| C  | -1.542930 | 2.774461  | 0.893333  |
| H  | -2.472882 | 0.078730  | 0.399408  |
| H  | -0.227505 | 1.523716  | 2.035743  |
| H  | -1.780724 | 3.430549  | 1.723669  |
| O  | -0.900345 | 0.268298  | -3.555759 |
| H  | 0.171884  | -1.450102 | -4.566052 |
| C  | -2.578729 | 2.379433  | -2.799134 |
| H  | -1.853560 | 2.536073  | -3.599527 |
| H  | -3.131870 | 1.473040  | -3.055924 |
| H  | -3.268468 | 3.221965  | -2.765432 |
| C  | 0.113777  | -1.396016 | 2.673923  |
| C  | 0.066964  | -1.505402 | 4.067729  |
| C  | -0.962979 | -2.241496 | 4.694295  |
| C  | -1.953352 | -2.887140 | 3.979148  |
| C  | -1.946379 | -2.808826 | 2.562879  |
| C  | -0.922192 | -2.054561 | 1.922791  |
| N  | -0.871872 | -1.924331 | 0.561576  |
| C  | -1.770374 | -2.534129 | -0.194461 |
| C  | -2.809233 | -3.316007 | 0.355797  |
| C  | -2.901452 | -3.442299 | 1.724092  |
| N  | 1.034175  | -0.734852 | 1.888993  |
| H  | -0.965525 | -2.299736 | 5.779735  |
| H  | -2.732392 | -3.454613 | 4.479177  |
| H  | -3.699707 | -4.024532 | 2.176150  |
| H  | -3.528239 | -3.787023 | -0.305212 |
| H  | -1.681545 | -2.374378 | -1.262231 |
| C  | 2.107142  | -0.019075 | 2.340253  |
| C  | 2.829205  | 0.603830  | 1.176231  |
| C  | 4.017140  | 1.369651  | 1.327467  |
| C  | 2.227875  | 0.371643  | -0.080197 |
| C  | 4.550572  | 1.880985  | 0.138934  |
| C  | 2.821299  | 0.915245  | -1.222331 |
| C  | 3.987096  | 1.673204  | -1.119435 |
| H  | 2.376417  | 0.749984  | -2.199223 |
| H  | 4.453275  | 2.098273  | -2.002167 |
| O  | 2.440315  | 0.106716  | 3.533476  |
| H  | 0.833524  | -1.019299 | 4.653263  |
| C  | 4.645810  | 1.603125  | 2.680554  |
| H  | 5.561912  | 2.186821  | 2.599078  |
| H  | 3.948721  | 2.121270  | 3.343300  |
| H  | 4.868365  | 0.652187  | 3.170123  |
| Co | 0.684891  | -0.737441 | 0.008349  |
| C  | -4.229645 | -0.234971 | -0.258123 |
| O  | -3.386483 | 0.057505  | 0.746975  |
| O  | -3.849947 | -0.514730 | -1.381501 |
| C  | -5.690968 | -0.159239 | 0.183557  |
| C  | -6.594091 | -0.557448 | -0.991166 |
| H  | -7.644513 | -0.498309 | -0.689108 |
| H  | -6.440395 | 0.105653  | -1.846883 |
| H  | -6.384527 | -1.579927 | -1.318606 |
| C  | -5.905948 | -1.117012 | 1.375199  |
| H  | -5.266906 | -0.846085 | 2.218937  |
| H  | -6.950759 | -1.071656 | 1.699656  |
| H  | -5.678696 | -2.150635 | 1.095025  |
| C  | -5.982527 | 1.295419  | 0.616879  |
| H  | -7.030503 | 1.386620  | 0.921008  |
| H  | -5.348744 | 1.588445  | 1.457399  |
| H  | -5.801093 | 1.996466  | -0.204446 |
| Br | 6.228823  | 2.991299  | 0.142031  |
| Br | -3.440001 | 4.502546  | -0.429561 |

#### D<sup>+</sup>-ArCl

Energy = -3091.24566004 ZPE = -3090.616256 H = -3090.570718 G = -3090.695831

|    |           |           |           |    |           |           |           |
|----|-----------|-----------|-----------|----|-----------|-----------|-----------|
| C  | 1.031751  | -1.528877 | -2.495909 | C  | -4.088837 | -0.058828 | -0.360924 |
| C  | 0.938386  | -1.883870 | -3.845504 | O  | -3.298826 | 0.358449  | 0.642671  |
| C  | 1.651851  | -2.996747 | -4.343486 | O  | -3.655884 | -0.402978 | -1.446685 |
| C  | 2.463011  | -3.777000 | -3.542138 | C  | -5.567365 | -0.029410 | 0.026343  |
| C  | 2.591274  | -3.455911 | -2.166025 | C  | -6.401959 | -0.603846 | -1.125972 |
| C  | 1.876256  | -2.335401 | -1.653948 | H  | -7.464677 | -0.575974 | -0.865242 |
| N  | 1.957615  | -1.972479 | -0.338355 | H  | -6.253216 | -0.027646 | -2.043180 |
| C  | 2.714788  | -2.667829 | 0.493709  | H  | -6.123244 | -1.641174 | -1.333380 |
| C  | 3.456912  | -3.792857 | 0.072715  | C  | -5.772268 | -0.865385 | 1.307688  |
| C  | 3.394732  | -4.182468 | -1.247920 | H  | -5.186399 | -0.464271 | 2.138098  |
| N  | 0.413732  | -0.494967 | -1.827965 | H  | -6.830343 | -0.853382 | 1.589374  |
| H  | 1.552803  | -3.240313 | -5.398244 | H  | -5.471037 | -1.906277 | 1.151046  |
| H  | 3.003322  | -4.628442 | -3.944800 | C  | -5.957242 | 1.443080  | 0.289239  |
| H  | 3.955686  | -5.043783 | -1.600446 | H  | -7.016916 | 1.501661  | 0.558614  |
| H  | 4.063221  | -4.332223 | 0.792376  | H  | -5.365740 | 1.865736  | 1.105107  |
| H  | 2.731906  | -2.319140 | 1.521239  | H  | -5.796721 | 2.057928  | -0.602675 |
| C  | -0.431924 | 0.425301  | -2.379726 | Cl | 6.048456  | 3.466307  | -0.029528 |
| C  | -0.879336 | 1.402733  | -1.326148 | Cl | -3.303496 | 4.595845  | -0.653342 |
| C  | -1.825476 | 2.430198  | -1.580472 |    |           |           |           |
| C  | -0.292823 | 1.203568  | -0.054328 |    |           |           |           |
| C  | -2.113903 | 3.274565  | -0.497440 |    |           |           |           |
| C  | -0.620122 | 2.090978  | 0.978227  |    |           |           |           |
| C  | -1.522540 | 3.129448  | 0.759388  |    |           |           |           |
| H  | -2.375478 | 0.404470  | 0.322964  |    |           |           |           |
| H  | -0.183207 | 1.963095  | 1.963576  |    |           |           |           |
| H  | -1.788464 | 3.814600  | 1.558201  |    |           |           |           |
| O  | -0.771393 | 0.467448  | -3.575703 |    |           |           |           |
| H  | 0.311430  | -1.292412 | -4.496592 |    |           |           |           |
| C  | -2.516750 | 2.562913  | -2.915308 |    |           |           |           |
| H  | -1.791771 | 2.711858  | -3.717603 |    |           |           |           |
| H  | -3.041607 | 1.632404  | -3.144828 |    |           |           |           |
| H  | -3.231402 | 3.385719  | -2.916824 |    |           |           |           |
| C  | 0.302159  | -0.902787 | 2.735685  |    |           |           |           |
| C  | 0.278959  | -0.957242 | 4.133523  |    |           |           |           |
| C  | -0.711081 | -1.708277 | 4.804835  |    |           |           |           |
| C  | -1.684320 | -2.421640 | 4.131601  |    |           |           |           |
| C  | -1.700321 | -2.400503 | 2.713346  |    |           |           |           |
| C  | -0.716340 | -1.632915 | 2.027469  |    |           |           |           |
| N  | -0.688609 | -1.557958 | 0.661385  |    |           |           |           |
| C  | -1.572271 | -2.232815 | -0.055455 |    |           |           |           |
| C  | -2.573096 | -3.030054 | 0.541998  |    |           |           |           |
| C  | -2.641098 | -3.104894 | 1.915598  |    |           |           |           |
| N  | 1.184549  | -0.239412 | 1.911078  |    |           |           |           |
| H  | -0.696075 | -1.722735 | 5.891675  |    |           |           |           |
| H  | -2.432850 | -2.998909 | 4.665907  |    |           |           |           |
| H  | -3.409111 | -3.699257 | 2.402998  |    |           |           |           |
| H  | -3.282358 | -3.554517 | -0.088704 |    |           |           |           |
| H  | -1.505953 | -2.111800 | -1.129841 |    |           |           |           |
| C  | 2.235765  | 0.534556  | 2.316256  |    |           |           |           |
| C  | 2.924063  | 1.127510  | 1.118288  |    |           |           |           |
| C  | 4.080530  | 1.943877  | 1.220526  |    |           |           |           |
| C  | 2.323199  | 0.812225  | -0.120631 |    |           |           |           |
| C  | 4.596467  | 2.424670  | 0.007200  |    |           |           |           |
| C  | 2.889778  | 1.322727  | -1.291661 |    |           |           |           |
| C  | 4.025039  | 2.128230  | -1.232659 |    |           |           |           |
| H  | 2.445438  | 1.093932  | -2.255839 |    |           |           |           |
| H  | 4.471998  | 2.529841  | -2.137009 |    |           |           |           |
| O  | 2.576242  | 0.726424  | 3.498961  |    |           |           |           |
| H  | 1.033587  | -0.417720 | 4.686911  |    |           |           |           |
| C  | 4.714472  | 2.271205  | 2.552311  |    |           |           |           |
| H  | 5.604117  | 2.888969  | 2.431836  |    |           |           |           |
| H  | 4.003239  | 2.790860  | 3.198893  |    |           |           |           |
| H  | 4.983705  | 1.356489  | 3.085811  |    |           |           |           |
| Co | 0.820288  | -0.344984 | 0.035580  |    |           |           |           |

**D'-ArMe**

Energy = -2250.69527672 ZPE = -2249.990897 H =  
-2249.944913 G = -2250.0696

|   |           |           |           |
|---|-----------|-----------|-----------|
| C | 1.181659  | -1.907838 | -2.084059 |
| C | 1.129071  | -2.596232 | -3.301877 |
| C | 1.878539  | -3.778337 | -3.489340 |
| C | 2.688183  | -4.309357 | -2.503107 |
| C | 2.775483  | -3.648342 | -1.250684 |
| C | 2.023408  | -2.454812 | -1.050323 |
| N | 2.063534  | -1.771298 | 0.132454  |
| C | 2.814405  | -2.214381 | 1.127035  |
| C | 3.592020  | -3.387843 | 1.016862  |
| C | 3.572043  | -4.098073 | -0.164378 |
| N | 0.527643  | -0.757067 | -1.711503 |
| H | 1.809948  | -4.282824 | -4.449996 |
| H | 3.256973  | -5.219544 | -2.668038 |
| H | 4.160854  | -5.004329 | -0.278470 |
| H | 4.191930  | -3.712491 | 1.860331  |
| H | 2.797136  | -1.618189 | 2.033883  |
| C | -0.334957 | -0.033522 | -2.489421 |
| C | -0.829476 | 1.165270  | -1.731122 |
| C | -1.793112 | 2.070297  | -2.241492 |
| C | -0.260428 | 1.317878  | -0.442231 |
| C | -2.156063 | 3.181136  | -1.448715 |
| C | -0.630940 | 2.435520  | 0.312429  |
| C | -1.555235 | 3.350532  | -0.192525 |
| H | -2.337851 | 0.606988  | 0.019246  |
| H | -0.209997 | 2.583377  | 1.302987  |
| H | -1.840545 | 4.210907  | 0.410989  |
| O | -0.652287 | -0.315520 | -3.660309 |
| H | 0.504799  | -2.205851 | -4.092244 |
| C | -2.463598 | 1.825773  | -3.575547 |
| H | -1.733474 | 1.785130  | -4.387172 |
| H | -2.957160 | 0.850212  | -3.565623 |
| H | -3.206329 | 2.590168  | -3.808047 |
| C | 0.316114  | 0.004515  | 2.803371  |
| C | 0.260376  | 0.303895  | 4.170309  |
| C | -0.724789 | -0.283486 | 4.993636  |
| C | -1.663332 | -1.174687 | 4.508470  |
| C | -1.647190 | -1.512457 | 3.130877  |
| C | -0.669265 | -0.911346 | 2.287507  |
| N | -0.614325 | -1.180339 | 0.947829  |
| C | -1.465200 | -2.039025 | 0.410826  |
| C | -2.454634 | -2.694860 | 1.175445  |
| C | -2.548842 | -2.426560 | 2.523204  |

|                                                |           |           |           |    |           |           |           |
|------------------------------------------------|-----------|-----------|-----------|----|-----------|-----------|-----------|
| N                                              | 1.201164  | 0.460708  | 1.853880  | H  | -4.196536 | 3.692989  | 1.878536  |
| H                                              | -0.734720 | -0.022212 | 6.048963  | H  | -2.772341 | 1.619014  | 2.052735  |
| H                                              | -2.407826 | -1.622150 | 5.160153  | C  | 0.290324  | 0.012436  | -2.513206 |
| H                                              | -3.309064 | -2.905782 | 3.134130  | C  | 0.826961  | -1.169999 | -1.749165 |
| H                                              | -3.134805 | -3.384164 | 0.687292  | C  | 1.795456  | -2.070545 | -2.253177 |
| H                                              | -1.379495 | -2.187353 | -0.658993 | C  | 0.280425  | -1.309853 | -0.447052 |
| C                                              | 2.225563  | 1.344698  | 2.065173  | C  | 2.174254  | -3.164751 | -1.441598 |
| C                                              | 2.933856  | 1.629368  | 0.773579  | C  | 0.668869  | -2.415795 | 0.315767  |
| C                                              | 4.072776  | 2.465608  | 0.673486  | C  | 1.590636  | -3.338708 | -0.178048 |
| C                                              | 2.368830  | 0.992892  | -0.356714 | H  | 2.313576  | -0.577115 | 0.039611  |
| C                                              | 4.651894  | 2.662689  | -0.599897 | H  | 0.256551  | -2.553752 | 1.311300  |
| C                                              | 2.962315  | 1.203400  | -1.602054 | H  | 1.890831  | -4.191361 | 0.429782  |
| C                                              | 4.084134  | 2.025933  | -1.713871 | O  | 0.559410  | 0.286563  | -3.700045 |
| H                                              | 2.547815  | 0.726803  | -2.486536 | H  | -0.607122 | 2.153416  | -4.124757 |
| H                                              | 4.537532  | 2.183491  | -2.691829 | C  | 2.503811  | -1.906391 | -3.578330 |
| O                                              | 2.525813  | 1.841577  | 3.168967  | H  | 2.285857  | -2.744853 | -4.256536 |
| H                                              | 0.987295  | 0.989355  | 4.580704  | H  | 2.202335  | -0.988358 | -4.073620 |
| C                                              | 4.666285  | 3.135864  | 1.895496  | H  | 3.590411  | -1.900521 | -3.423313 |
| H                                              | 5.559810  | 3.712883  | 1.653114  | C  | -0.266276 | 0.032522  | 2.794254  |
| H                                              | 3.939662  | 3.802652  | 2.368403  | C  | -0.181889 | -0.251245 | 4.163173  |
| H                                              | 4.923780  | 2.399168  | 2.661213  | C  | 0.809123  | 0.357996  | 4.963394  |
| Co                                             | 0.884115  | -0.125240 | 0.059546  | C  | 1.726147  | 1.257181  | 4.453157  |
| C                                              | -4.050345 | -0.099826 | -0.427626 | C  | 1.680644  | 1.580649  | 3.072856  |
| O                                              | -3.247066 | 0.603937  | 0.384513  | C  | 0.697029  | 0.957183  | 2.252480  |
| O                                              | -3.646056 | -0.705214 | -1.405077 | N  | 0.616620  | 1.211962  | 0.911523  |
| C                                              | -5.513159 | -0.026786 | 0.014780  | C  | 1.445498  | 2.077529  | 0.352135  |
| C                                              | -6.363252 | -0.921244 | -0.897243 | C  | 2.438281  | 2.755149  | 1.092992  |
| H                                              | -7.414140 | -0.869028 | -0.595146 | C  | 2.559250  | 2.500968  | 2.441200  |
| H                                              | -6.284947 | -0.605465 | -1.941113 | N  | -1.160155 | -0.448849 | 1.863599  |
| H                                              | -6.037014 | -1.963774 | -0.838188 | H  | 0.840999  | 0.107166  | 6.020830  |
| C                                              | -5.626260 | -0.495643 | 1.481040  | H  | 2.475706  | 1.721628  | 5.086976  |
| H                                              | -5.016553 | 0.124388  | 2.142343  | H  | 3.323372  | 2.995730  | 3.034616  |
| H                                              | -6.669602 | -0.434291 | 1.807681  | H  | 3.100401  | 3.448880  | 0.586647  |
| H                                              | -5.294152 | -1.532986 | 1.588536  | H  | 1.339100  | 2.214402  | -0.717358 |
| C                                              | -5.967822 | 1.445740  | -0.103622 | C  | -2.174640 | -1.333483 | 2.107383  |
| H                                              | -7.016706 | 1.534970  | 0.198225  | C  | -2.901282 | -1.653450 | 0.828372  |
| H                                              | -5.364258 | 2.095099  | 0.535362  | C  | -4.025550 | -2.510570 | 0.740964  |
| H                                              | -5.879275 | 1.801844  | -1.135908 | C  | -2.358436 | -1.018762 | -0.315871 |
| C                                              | 5.870495  | 3.541315  | -0.802827 | C  | -4.620236 | -2.704668 | -0.527067 |
| H                                              | 5.693785  | 4.576196  | -0.485908 | C  | -2.966299 | -1.242934 | -1.551698 |
| H                                              | 6.740306  | 3.182103  | -0.239445 | C  | -4.086472 | -2.068409 | -1.657300 |
| H                                              | 6.154513  | 3.567391  | -1.858933 | H  | -2.567803 | -0.764598 | -2.442548 |
| C                                              | -3.199589 | 4.182120  | -1.900514 | H  | -4.558383 | -2.229787 | -2.626178 |
| H                                              | -2.943112 | 4.648771  | -2.858554 | O  | -2.449257 | -1.797597 | 3.233995  |
| H                                              | -4.184742 | 3.715983  | -2.026639 | H  | -0.891056 | -0.942204 | 4.594307  |
| H                                              | -3.310595 | 4.983053  | -1.163899 | C  | -4.637128 | -3.240389 | 1.917137  |
|                                                |           |           |           | H  | -4.744988 | -4.309032 | 1.690668  |
|                                                |           |           |           | H  | -4.034827 | -3.116645 | 2.812653  |
|                                                |           |           |           | H  | -5.648787 | -2.865097 | 2.134643  |
|                                                |           |           |           | Co | -0.879013 | 0.121864  | 0.059642  |
|                                                |           |           |           | C  | 4.031997  | 0.107641  | -0.432965 |
|                                                |           |           |           | O  | 3.227317  | -0.573763 | 0.396197  |
|                                                |           |           |           | O  | 3.628005  | 0.705794  | -1.414666 |
|                                                |           |           |           | C  | 5.496886  | 0.026091  | 0.002258  |
|                                                |           |           |           | C  | 6.359864  | 0.843523  | -0.968067 |
|                                                |           |           |           | H  | 7.410991  | 0.790210  | -0.666800 |
|                                                |           |           |           | H  | 6.271442  | 0.462265  | -1.989210 |
|                                                |           |           |           | H  | 6.053966  | 1.893692  | -0.975807 |
|                                                |           |           |           | C  | 5.626746  | 0.585736  | 1.435297  |
|                                                |           |           |           | H  | 5.003314  | 0.024865  | 2.135696  |
|                                                |           |           |           | H  | 6.669204  | 0.519266  | 1.764030  |
|                                                |           |           |           | H  | 5.320882  | 1.635877  | 1.476154  |
|                                                |           |           |           | C  | 5.922346  | -1.459244 | -0.022173 |
|                                                |           |           |           | H  | 6.975961  | -1.546953 | 0.263475  |
| <b>D<sup>+</sup>-ArNH<sub>2</sub></b>          |           |           |           |    |           |           |           |
| Energy = -2282.77292751 ZPE = -2282.090227 H = |           |           |           |    |           |           |           |
| -2282.044746 G = -2282.168144                  |           |           |           |    |           |           |           |
| C                                              | -1.238761 | 1.872555  | -2.099493 |    |           |           |           |
| C                                              | -1.220276 | 2.545596  | -3.326925 |    |           |           |           |
| C                                              | -1.989094 | 3.715083  | -3.515445 |    |           |           |           |
| C                                              | -2.786024 | 4.248598  | -2.520612 |    |           |           |           |
| C                                              | -2.839678 | 3.603247  | -1.258243 |    |           |           |           |
| C                                              | -2.067982 | 2.422281  | -1.056737 |    |           |           |           |
| N                                              | -2.077209 | 1.754846  | 0.135607  |    |           |           |           |
| C                                              | -2.814327 | 2.202342  | 1.138345  |    |           |           |           |
| C                                              | -3.609062 | 3.364244  | 1.027906  |    |           |           |           |
| C                                              | -3.621029 | 4.058072  | -0.163039 |    |           |           |           |
| N                                              | -0.559877 | 0.735431  | -1.724165 |    |           |           |           |
| H                                              | -1.946013 | 4.207124  | -4.484002 |    |           |           |           |
| H                                              | -3.370109 | 5.148983  | -2.686080 |    |           |           |           |
| H                                              | -4.223393 | 4.955238  | -0.278308 |    |           |           |           |



|   |           |           |           |
|---|-----------|-----------|-----------|
| H | 5.321576  | -2.049613 | 0.673878  |
| H | 5.802377  | -1.888634 | -1.022565 |
| N | 3.203242  | -4.035431 | -1.863864 |
| N | -5.711859 | -3.595200 | -0.671659 |
| H | -6.363093 | -3.569075 | 0.104454  |
| H | -6.221568 | -3.441654 | -1.534221 |
| H | 3.205533  | -4.220136 | -2.859911 |
| H | 3.205230  | -4.913530 | -1.358395 |

**D'-ArOH**

Energy = -2322.49893882 ZPE = -2321.842056 H =  
-2321.796571 G = -2321.919784

|   |           |           |           |
|---|-----------|-----------|-----------|
| C | -1.272730 | 2.348324  | -1.547955 |
| C | -1.238109 | 3.328212  | -2.547164 |
| C | -2.058680 | 4.473801  | -2.454878 |
| C | -2.922638 | 4.686152  | -1.397254 |
| C | -2.993993 | 3.722016  | -0.358683 |
| C | -2.169698 | 2.562773  | -0.440780 |
| N | -2.189855 | 1.597877  | 0.526858  |
| C | -2.991009 | 1.725285  | 1.571392  |
| C | -3.841777 | 2.840475  | 1.734404  |
| C | -3.841886 | 3.830710  | 0.775459  |
| N | -0.554484 | 1.179196  | -1.457438 |
| H | -2.002443 | 5.211294  | -3.251756 |
| H | -3.545748 | 5.574005  | -1.346158 |
| H | -4.486157 | 4.700327  | 0.873999  |
| H | -4.480727 | 2.901859  | 2.608887  |
| H | -2.955215 | 0.917131  | 2.295318  |
| C | 0.376971  | 0.734763  | -2.355911 |
| C | 0.933563  | -0.585160 | -1.906920 |
| C | 1.976321  | -1.250471 | -2.592137 |
| C | 0.349388  | -1.100398 | -0.723897 |
| C | 2.399342  | -2.484903 | -2.068920 |
| C | 0.783398  | -2.349511 | -0.267095 |
| C | 1.794292  | -3.040947 | -0.937474 |
| H | 2.292115  | -0.394265 | 0.168692  |
| H | 0.349821  | -2.778518 | 0.631770  |
| H | 2.143474  | -4.003973 | -0.566925 |
| O | 0.708304  | 1.325474  | -3.400850 |
| H | -0.572502 | 3.190931  | -3.386928 |
| C | 2.683139  | -0.663103 | -3.791115 |
| H | 1.981461  | -0.443777 | -4.598552 |
| H | 3.142248  | 0.290251  | -3.514619 |
| H | 3.457749  | -1.338556 | -4.156916 |
| C | -0.356256 | -0.709071 | 2.717119  |
| C | -0.289963 | -1.358453 | 3.956019  |
| C | 0.660986  | -0.963735 | 4.922156  |
| C | 1.555145  | 0.067995  | 4.706506  |
| C | 1.525874  | 0.759754  | 3.468500  |
| C | 0.578944  | 0.361307  | 2.481925  |
| N | 0.511477  | 0.977814  | 1.262445  |
| C | 1.320191  | 1.988284  | 0.986590  |
| C | 2.280960  | 2.455617  | 1.909852  |
| C | 2.388054  | 1.839075  | 3.136729  |
| N | -1.207665 | -0.945328 | 1.662321  |
| H | 0.681287  | -1.495845 | 5.870058  |
| H | 2.275618  | 0.359163  | 5.464999  |
| H | 3.127531  | 2.168034  | 3.861934  |
| H | 2.930351  | 3.278496  | 1.632121  |
| H | 1.225096  | 2.415430  | -0.004531 |
| C | -2.175640 | -1.911978 | 1.609506  |
| C | -2.844488 | -1.895549 | 0.266952  |
| C | -3.923797 | -2.748398 | -0.063994 |
| C | -2.306012 | -0.963090 | -0.649989 |

|    |           |           |           |
|----|-----------|-----------|-----------|
| C  | -4.453567 | -2.636507 | -1.362164 |
| C  | -2.866092 | -0.889612 | -1.926244 |
| C  | -3.932543 | -1.719032 | -2.281328 |
| H  | -2.470705 | -0.184070 | -2.651974 |
| H  | -4.368607 | -1.660395 | -3.278280 |
| O  | -2.461483 | -2.696183 | 2.535640  |
| H  | -0.980884 | -2.164159 | 4.156899  |
| C  | -4.518026 | -3.748756 | 0.902627  |
| H  | -5.352699 | -4.282723 | 0.446353  |
| H  | -3.766316 | -4.472402 | 1.229329  |
| H  | -4.865564 | -3.254082 | 1.813844  |
| Co | -0.903544 | 0.097571  | 0.084706  |
| C  | 4.008614  | 0.296551  | -0.287347 |
| O  | 3.223710  | -0.506296 | 0.448577  |
| O  | 3.573301  | 1.159230  | -1.029348 |
| C  | 5.491393  | -0.006618 | -0.071011 |
| C  | 6.327791  | 0.876993  | -1.005857 |
| H  | 7.393276  | 0.682112  | -0.847249 |
| H  | 6.090187  | 0.672963  | -2.053931 |
| H  | 6.136101  | 1.937322  | -0.819932 |
| C  | 5.836994  | 0.294882  | 1.404217  |
| H  | 5.238983  | -0.320697 | 2.081119  |
| H  | 6.896153  | 0.084798  | 1.586416  |
| H  | 5.651618  | 1.347366  | 1.644434  |
| C  | 5.740133  | -1.500620 | -0.377171 |
| H  | 6.810004  | -1.719960 | -0.294422 |
| H  | 5.199449  | -2.137823 | 0.326678  |
| H  | 5.408097  | -1.763134 | -1.387077 |
| O  | -5.508873 | -3.461030 | -1.705608 |
| O  | 3.451558  | -3.125197 | -2.695937 |
| H  | -5.759707 | -3.272801 | -2.619293 |
| H  | 3.676364  | -3.915945 | -2.188439 |

**D1**

Energy = -2172.50366193 ZPE = -2171.84002 H = -  
2171.797245 G = -2171.913785

|   |           |           |           |
|---|-----------|-----------|-----------|
| C | -2.227658 | -1.529734 | 0.134567  |
| C | -2.275202 | -2.164005 | 1.354814  |
| C | -3.491127 | -2.255642 | 2.071468  |
| C | -4.649806 | -1.695067 | 1.581112  |
| C | -4.631319 | -1.018028 | 0.335357  |
| C | -3.410848 | -0.945468 | -0.405457 |
| N | -3.326791 | -0.318119 | -1.612835 |
| C | -4.411766 | 0.253435  | -2.103962 |
| C | -5.665156 | 0.246087  | -1.446404 |
| C | -5.770920 | -0.390922 | -0.230989 |
| N | -1.014492 | -1.383457 | -0.628297 |
| H | -3.495739 | -2.765598 | 3.029433  |
| H | -5.579803 | -1.754285 | 2.138507  |
| H | -6.714605 | -0.419587 | 0.306365  |
| H | -6.516287 | 0.737981  | -1.904166 |
| H | -4.304243 | 0.753382  | -3.064370 |
| C | -0.437401 | -2.606060 | -1.223487 |
| C | 0.864092  | -2.310377 | -1.838871 |
| C | 1.418528  | -3.145251 | -2.841929 |
| C | 1.546071  | -1.177596 | -1.333273 |
| C | 2.673273  | -2.796105 | -3.344396 |
| C | 2.813172  | -0.882809 | -1.846626 |
| C | 3.361242  | -1.681524 | -2.851624 |
| H | 3.121069  | -3.404133 | -4.125587 |
| H | 3.374599  | -0.034533 | -1.471970 |
| H | 4.340775  | -1.438591 | -3.256605 |
| O | -1.013025 | -3.672933 | -1.144883 |
| H | -1.372055 | -2.571928 | 1.785107  |

|                                                 |           |           |           |    |           |           |           |
|-------------------------------------------------|-----------|-----------|-----------|----|-----------|-----------|-----------|
| C                                               | 0.704405  | -4.366905 | -3.366767 | C  | -3.068040 | 1.025731  | -1.545324 |
| H                                               | 0.637180  | -5.141319 | -2.596760 | N  | -1.889670 | 1.348999  | -2.151419 |
| H                                               | -0.324714 | -4.138034 | -3.659975 | C  | -1.700292 | 2.603282  | -2.521249 |
| H                                               | 1.231784  | -4.778535 | -4.231252 | C  | -2.655813 | 3.630913  | -2.337672 |
| C                                               | 2.328828  | 2.045945  | -0.317120 | C  | -3.854591 | 3.317852  | -1.739645 |
| C                                               | 3.438248  | 2.888975  | -0.307415 | N  | -2.210466 | -1.209410 | -1.370261 |
| C                                               | 3.525016  | 3.972508  | -1.211090 | H  | -6.370462 | -0.024428 | 0.232515  |
| C                                               | 2.522073  | 4.251484  | -2.113845 | H  | -6.075615 | 2.331262  | -0.489769 |
| C                                               | 1.374226  | 3.419328  | -2.155602 | H  | -4.616415 | 4.075618  | -1.579141 |
| C                                               | 1.290486  | 2.305463  | -1.269730 | H  | -2.432511 | 4.639658  | -2.667711 |
| N                                               | 0.220103  | 1.448397  | -1.280907 | H  | -0.747055 | 2.835328  | -2.991204 |
| C                                               | -0.784817 | 1.692962  | -2.110953 | C  | -1.969556 | -2.450804 | -0.828684 |
| C                                               | -0.795355 | 2.784084  | -3.005785 | C  | -0.633355 | -3.026891 | -1.193186 |
| C                                               | 0.284326  | 3.636369  | -3.035875 | C  | -0.562379 | -4.389132 | -1.571215 |
| N                                               | 2.065016  | 0.964421  | 0.529826  | C  | 0.513911  | -2.206796 | -1.097305 |
| H                                               | 4.407914  | 4.604208  | -1.174435 | C  | 0.694089  | -4.917875 | -1.887510 |
| H                                               | 2.591023  | 5.096605  | -2.791681 | C  | 1.753999  | -2.802283 | -1.407903 |
| H                                               | 0.314508  | 4.478371  | -3.721647 | C  | 1.848354  | -4.135041 | -1.807039 |
| H                                               | -1.650815 | 2.926491  | -3.656606 | H  | 0.767163  | -5.956394 | -2.200936 |
| H                                               | -1.628925 | 1.012806  | -2.076261 | H  | 2.668787  | -2.214263 | -1.329008 |
| C                                               | 2.959820  | 0.478588  | 1.473415  | H  | 2.814442  | -4.570466 | -2.051696 |
| C                                               | 2.522916  | -0.852764 | 1.973878  | O  | -2.782254 | -3.037232 | -0.107370 |
| C                                               | 3.202088  | -1.535847 | 3.011155  | H  | -4.585629 | -1.702818 | -0.156240 |
| C                                               | 1.434027  | -1.429508 | 1.280663  | C  | -1.783295 | -5.278198 | -1.658517 |
| C                                               | 2.784672  | -2.837257 | 3.314311  | H  | -2.163382 | -5.520233 | -0.662083 |
| C                                               | 1.097408  | -2.755191 | 1.575454  | H  | -2.605658 | -4.789761 | -2.190306 |
| C                                               | 1.760021  | -3.448768 | 2.591625  | H  | -1.544430 | -6.211334 | -2.176483 |
| H                                               | 3.284311  | -3.383311 | 4.110305  | C  | 3.467714  | 0.746221  | -0.028503 |
| H                                               | 0.336098  | -3.279762 | 1.011619  | C  | 4.767466  | 1.057217  | 0.361641  |
| H                                               | 1.477901  | -4.474471 | 2.817133  | C  | 5.659371  | 1.714903  | -0.518073 |
| O                                               | 3.984390  | 1.068534  | 1.837721  | C  | 5.288899  | 2.074197  | -1.794351 |
| H                                               | 4.224612  | 2.710998  | 0.410055  | C  | 3.976995  | 1.776306  | -2.243804 |
| C                                               | 4.347742  | -0.929928 | 3.787642  | C  | 3.067995  | 1.119938  | -1.360569 |
| H                                               | 5.211023  | -0.747146 | 3.141718  | N  | 1.798280  | 0.810482  | -1.766224 |
| H                                               | 4.077802  | 0.043081  | 4.206874  | C  | 1.399431  | 1.101552  | -2.997552 |
| H                                               | 4.650535  | -1.594892 | 4.602004  | C  | 2.231918  | 1.753697  | -3.927216 |
| Co                                              | 0.625322  | -0.210879 | 0.021318  | C  | 3.513554  | 2.090914  | -3.545798 |
| H                                               | -1.269158 | -0.799940 | -1.433095 | N  | 2.467077  | 0.131812  | 0.748537  |
| C                                               | -2.199359 | 2.532016  | 2.090196  | H  | 6.662178  | 1.936457  | -0.164704 |
| C                                               | -3.074698 | 1.580637  | 2.928660  | H  | 5.980246  | 2.575229  | -2.464736 |
| H                                               | -2.630785 | 1.404005  | 3.913955  | H  | 4.184569  | 2.592963  | -4.237022 |
| H                                               | -4.062642 | 2.027726  | 3.075555  | H  | 1.857575  | 1.976056  | -4.919945 |
| H                                               | -3.196785 | 0.618732  | 2.428087  | H  | 0.384580  | 0.807000  | -3.245267 |
| C                                               | -2.858557 | 2.759311  | 0.705709  | C  | 2.733746  | -0.473621 | 1.955709  |
| H                                               | -3.835873 | 3.231901  | 0.842405  | C  | 1.485209  | -1.040674 | 2.598250  |
| H                                               | -2.246297 | 3.412043  | 0.074999  | C  | 1.064357  | -0.632383 | 3.890271  |
| H                                               | -2.999768 | 1.810052  | 0.183729  | C  | 0.682145  | -1.938860 | 1.927212  |
| C                                               | -1.998948 | 3.871533  | 2.813156  | C  | -0.139953 | -1.154509 | 4.382307  |
| H                                               | -1.500056 | 3.730790  | 3.776595  | C  | -0.500254 | -2.485060 | 2.379736  |
| H                                               | -1.397515 | 4.561206  | 2.215664  | C  | -0.916820 | -2.060027 | 3.649256  |
| H                                               | -2.973575 | 4.334219  | 2.996516  | H  | -0.481689 | -0.839145 | 5.364395  |
| C                                               | -0.876096 | 1.837928  | 1.796051  | H  | -1.095109 | -3.168088 | 1.781618  |
| O                                               | -0.836733 | 0.665603  | 1.414803  | H  | -1.847836 | -2.434839 | 4.066663  |
| O                                               | 0.214561  | 2.577924  | 1.909518  | O  | 3.823157  | -0.552839 | 2.531407  |
| H                                               | 0.972541  | 2.022087  | 1.582221  | H  | 5.092917  | 0.783962  | 1.354144  |
| <b>D1-q</b>                                     |           |           |           | C  | 1.857382  | 0.377165  | 4.684739  |
| Energy = -2172.4437743 ZPE = -2171.784609 H = - |           |           |           | H  | 2.889687  | 0.046008  | 4.817289  |
| 2171.740082 G = -2171.862562                    |           |           |           | H  | 1.890673  | 1.336224  | 4.155354  |
| C                                               | -3.262871 | -0.330765 | -1.111901 | H  | 1.404709  | 0.546506  | 5.664945  |
| C                                               | -4.448032 | -0.682910 | -0.484017 | Co | 0.774634  | -0.342882 | -0.376599 |
| C                                               | -5.456260 | 0.284317  | -0.265435 | H  | -1.470645 | -0.801821 | -1.929592 |
| C                                               | -5.299300 | 1.592486  | -0.664813 | C  | -1.608697 | 2.223372  | 2.327696  |
| C                                               | -4.099831 | 1.987250  | -1.312542 | C  | -2.834808 | 1.297661  | 2.322650  |
|                                                 |           |           |           | H  | -2.606830 | 0.348150  | 2.816165  |

|   |           |          |          |
|---|-----------|----------|----------|
| H | -3.655484 | 1.780791 | 2.861121 |
| H | -3.166160 | 1.081608 | 1.307721 |
| C | -1.924408 | 3.537455 | 1.570452 |
| H | -2.758720 | 4.044567 | 2.064853 |
| H | -1.061816 | 4.210430 | 1.571357 |
| H | -2.211433 | 3.335953 | 0.535339 |
| C | -1.176548 | 2.533687 | 3.773512 |
| H | -0.919215 | 1.614574 | 4.307745 |
| H | -0.312955 | 3.201512 | 3.801331 |
| H | -2.005373 | 3.016677 | 4.299780 |
| C | -0.473321 | 1.560586 | 1.564167 |
| O | -0.670141 | 0.678916 | 0.714972 |
| O | 0.731781  | 2.027272 | 1.836563 |
| H | 1.416185  | 1.467509 | 1.366021 |

**D1-t**

Energy = -2172.49200828 ZPE = -2171.830721 H =  
-2171.787125 G = -2171.906135

|   |           |           |           |
|---|-----------|-----------|-----------|
| C | -3.118557 | -0.904024 | -0.834862 |
| C | -3.963009 | -1.763943 | -0.150431 |
| C | -5.173258 | -1.281379 | 0.402875  |
| C | -5.551353 | 0.036564  | 0.278155  |
| C | -4.712622 | 0.942224  | -0.423123 |
| C | -3.486130 | 0.476451  | -0.985611 |
| N | -2.632995 | 1.293667  | -1.662430 |
| C | -2.954994 | 2.567548  | -1.795722 |
| C | -4.147498 | 3.130382  | -1.281668 |
| C | -5.023056 | 2.315350  | -0.600466 |
| N | -1.886232 | -1.255935 | -1.390049 |
| H | -5.810183 | -1.979130 | 0.937928  |
| H | -6.481193 | 0.397505  | 0.707178  |
| H | -5.947891 | 2.707944  | -0.187231 |
| H | -4.352581 | 4.185321  | -1.427491 |
| H | -2.245421 | 3.195215  | -2.331546 |
| C | -1.300983 | -2.498022 | -1.485052 |
| C | 0.117827  | -2.472508 | -1.969026 |
| C | 0.523977  | -3.403422 | -2.956317 |
| C | 1.037882  | -1.581982 | -1.387131 |
| C | 1.865579  | -3.410856 | -3.347786 |
| C | 2.383790  | -1.644202 | -1.780191 |
| C | 2.792397  | -2.544482 | -2.762697 |
| H | 2.189656  | -4.108647 | -4.115221 |
| H | 3.119340  | -0.988159 | -1.320825 |
| H | 3.834355  | -2.576582 | -3.070732 |
| O | -1.880777 | -3.536575 | -1.165654 |
| H | -3.691832 | -2.804663 | -0.050592 |
| C | -0.449263 | -4.368885 | -3.594458 |
| H | -0.766728 | -5.132120 | -2.879008 |
| H | -1.359165 | -3.862409 | -3.932242 |
| H | 0.007369  | -4.863803 | -4.455619 |
| C | 3.051093  | 1.612070  | 0.130599  |
| C | 4.267996  | 2.186202  | 0.477372  |
| C | 4.801979  | 3.258086  | -0.276099 |
| C | 4.141524  | 3.774144  | -1.369847 |
| C | 2.899453  | 3.212570  | -1.765708 |
| C | 2.358838  | 2.127226  | -1.015423 |
| N | 1.173444  | 1.530422  | -1.372969 |
| C | 0.508540  | 1.980730  | -2.429446 |
| C | 0.966046  | 3.058012  | -3.214339 |
| C | 2.157228  | 3.667741  | -2.884087 |
| N | 2.381771  | 0.582529  | 0.805762  |
| H | 5.754342  | 3.682300  | 0.027941  |
| H | 4.554864  | 4.600756  | -1.939322 |
| H | 2.540894  | 4.496002  | -3.473040 |

|    |           |           |           |
|----|-----------|-----------|-----------|
| H  | 0.378316  | 3.384102  | -4.064907 |
| H  | -0.427975 | 1.482124  | -2.653677 |
| C  | 3.034163  | -0.419433 | 1.518159  |
| C  | 2.046289  | -1.471312 | 1.913216  |
| C  | 2.248983  | -2.342478 | 3.008670  |
| C  | 0.842629  | -1.497677 | 1.182985  |
| C  | 1.197704  | -3.197426 | 3.362218  |
| C  | -0.193376 | -2.346762 | 1.563740  |
| C  | -0.011747 | -3.191032 | 2.662777  |
| H  | 1.324623  | -3.867538 | 4.208490  |
| H  | -1.135050 | -2.355230 | 1.029299  |
| H  | -0.816421 | -3.853447 | 2.972170  |
| O  | 4.237538  | -0.439242 | 1.789792  |
| H  | 4.804045  | 1.798292  | 1.332058  |
| C  | 3.529525  | -2.356426 | 3.809842  |
| H  | 4.374847  | -2.682565 | 3.197530  |
| H  | 3.787403  | -1.355735 | 4.168772  |
| H  | 3.436995  | -3.027226 | 4.668562  |
| Co | 0.757261  | -0.084319 | -0.161225 |
| H  | -1.421949 | -0.475975 | -1.840804 |
| C  | -1.865383 | 1.603548  | 2.934880  |
| C  | -2.774153 | 0.354852  | 2.948893  |
| H  | -2.261996 | -0.497895 | 3.406879  |
| H  | -3.676497 | 0.567916  | 3.529694  |
| H  | -3.067489 | 0.073170  | 1.936749  |
| C  | -2.587638 | 2.770636  | 2.223748  |
| H  | -3.515758 | 3.002427  | 2.755285  |
| H  | -1.965894 | 3.672099  | 2.212963  |
| H  | -2.835204 | 2.504874  | 1.195078  |
| C  | -1.475374 | 2.004143  | 4.364806  |
| H  | -0.950289 | 1.191655  | 4.875235  |
| H  | -0.827685 | 2.884666  | 4.370287  |
| H  | -2.380431 | 2.238659  | 4.933457  |
| C  | -0.645949 | 1.261918  | 2.090526  |
| O  | -0.781897 | 0.781470  | 0.953960  |
| O  | 0.530418  | 1.506314  | 2.622714  |
| H  | 1.255790  | 1.227318  | 1.977252  |

**D-t'**

Energy = -2172.0086182 ZPE = -2171.362189 H = -  
2171.318305 G = -2171.44123

|   |           |           |           |
|---|-----------|-----------|-----------|
| C | 0.615059  | -2.554893 | -1.319493 |
| C | 0.710846  | -3.855042 | -1.827161 |
| C | -0.157902 | -4.304889 | -2.846594 |
| C | -1.131627 | -3.494039 | -3.393337 |
| C | -1.275370 | -2.165903 | -2.913220 |
| C | -0.416472 | -1.703617 | -1.872108 |
| N | -0.537137 | -0.439785 | -1.361221 |
| C | -1.439205 | 0.391470  | -1.856751 |
| C | -2.315229 | 0.024351  | -2.900367 |
| C | -2.236026 | -1.250706 | -3.417261 |
| N | 1.390626  | -1.955092 | -0.353962 |
| H | -0.043764 | -5.323094 | -3.210141 |
| H | -1.786855 | -3.849725 | -4.182944 |
| H | -2.903732 | -1.570501 | -4.213049 |
| H | -3.043096 | 0.740438  | -3.265894 |
| H | -1.488312 | 1.367226  | -1.387972 |
| C | 2.346347  | -2.565823 | 0.404632  |
| C | 2.941189  | -1.588185 | 1.387678  |
| C | 4.071467  | -1.891361 | 2.187534  |
| C | 2.334901  | -0.315034 | 1.470405  |
| C | 4.562247  | -0.894896 | 3.042705  |
| C | 2.846030  | 0.656596  | 2.331359  |
| C | 3.964865  | 0.367180  | 3.114475  |

|              |                |              |              |     |           |           |           |
|--------------|----------------|--------------|--------------|-----|-----------|-----------|-----------|
| H            | 5.431005       | -1.112029    | 3.659926     | C   | -2.416519 | -2.272675 | 0.855663  |
| H            | 2.361142       | 1.627436     | 2.389003     | C   | -3.711618 | -2.354657 | 1.419573  |
| H            | 4.370660       | 1.118063     | 3.789373     | C   | -4.763851 | -1.637306 | 0.893469  |
| O            | 2.704644       | -3.757479    | 0.324462     | C   | -4.555720 | -0.806913 | -0.238014 |
| H            | 1.470052       | -4.509316    | -1.422733    | C   | -3.251805 | -0.728150 | -0.816782 |
| C            | 4.775041       | -3.229615    | 2.148675     | N   | -2.978145 | 0.044741  | -1.905742 |
| H            | 4.104372       | -4.041388    | 2.442608     | C   | -3.957281 | 0.757053  | -2.433500 |
| H            | 5.108253       | -3.476109    | 1.136681     | C   | -5.280631 | 0.759202  | -1.930037 |
| H            | 5.642493       | -3.225306    | 2.816526     | C   | -5.576268 | -0.024514 | -0.837718 |
| C            | 0.903256       | 2.903839     | -0.589526    | N   | -0.879099 | -1.311353 | -0.823237 |
| C            | 0.623815       | 4.262937     | -0.783171    | H   | -3.866372 | -2.991123 | 2.285200  |
| C            | 1.300853       | 5.010899     | -1.771141    | H   | -5.755217 | -1.695134 | 1.332926  |
| C            | 2.265628       | 4.453659     | -2.587312    | H   | -6.580014 | -0.051068 | -0.422990 |
| C            | 2.595738       | 3.082219     | -2.429854    | H   | -6.036944 | 1.371920  | -2.408216 |
| C            | 1.918562       | 2.312979     | -1.435779    | H   | -3.702905 | 1.367856  | -3.297251 |
| N            | 2.211126       | 0.993884     | -1.239643    | C   | -0.270570 | -2.538091 | -1.436172 |
| C            | 3.131374       | 0.400354     | -1.981983    | C   | 1.172650  | -2.404535 | -1.528898 |
| C            | 3.844073       | 1.080810     | -2.992329    | C   | 1.837676  | -2.802340 | -2.720139 |
| C            | 3.575006       | 2.415010     | -3.210877    | C   | 1.873040  | -1.720133 | -0.445263 |
| N            | 0.336431       | 2.029569     | 0.298999     | C   | 3.171435  | -2.453677 | -2.893077 |
| H            | 1.046324       | 6.061683     | -1.887611    | C   | 3.256636  | -1.406766 | -0.698927 |
| H            | 2.776022       | 5.042331     | -3.343890    | C   | 3.862266  | -1.743146 | -1.885887 |
| H            | 4.106592       | 2.970509     | -3.979193    | H   | 3.682686  | -2.723193 | -3.812246 |
| H            | 4.588075       | 0.550080     | -3.576724    | H   | 3.843485  | -0.927660 | 0.075906  |
| H            | 3.302465       | -0.650760    | -1.767974    | H   | 4.906499  | -1.482570 | -2.040484 |
| C            | -0.494375      | 2.362221     | 1.318478     | O   | -0.996925 | -3.425950 | -1.856983 |
| C            | -0.852141      | 1.139114     | 2.133730     | H   | -1.598248 | -2.827723 | 1.295107  |
| C            | -1.835273      | 1.159111     | 3.156048     | C   | 1.109786  | -3.532224 | -3.825576 |
| C            | -0.172534      | -0.061965    | 1.821841     | H   | 0.750556  | -4.507644 | -3.486779 |
| C            | -2.088202      | -0.030658    | 3.853520     | H   | 0.223790  | -2.980159 | -4.156752 |
| C            | -0.446928      | -1.228092    | 2.545086     | H   | 1.767560  | -3.677126 | -4.686413 |
| C            | -1.403940      | -1.213002    | 3.560886     | C   | 2.538617  | 1.804747  | 0.219366  |
| H            | -2.846302      | -0.030229    | 4.633202     | C   | 3.676594  | 2.545275  | 0.509709  |
| H            | 0.088282       | -2.143062    | 2.304478     | C   | 4.087768  | 3.576250  | -0.367680 |
| H            | -1.625682      | -2.118785    | 4.121024     | C   | 3.375199  | 3.885970  | -1.507821 |
| O            | -0.913314      | 3.504192     | 1.599844     | C   | 2.209891  | 3.143311  | -1.835906 |
| H            | -0.124272      | 4.727239     | -0.156245    | C   | 1.809317  | 2.085904  | -0.973710 |
| C            | -2.658808      | 2.382552     | 3.485654     | N   | 0.717977  | 1.286419  | -1.236353 |
| H            | -2.033843      | 3.212998     | 3.821661     | C   | -0.013033 | 1.562677  | -2.312573 |
| H            | -3.182300      | 2.738039     | 2.594195     | C   | 0.297557  | 2.609552  | -3.206344 |
| H            | -3.394718      | 2.148944     | 4.262032     | C   | 1.409390  | 3.389465  | -2.980376 |
| Co           | 0.914419       | -0.032810    | 0.180933     | N   | 1.956333  | 0.785970  | 0.970636  |
| C            | -5.300482      | -0.417766    | -0.027884    | H   | 4.981515  | 4.142320  | -0.122115 |
| C            | -6.163232      | 0.641289     | -0.727669    | H   | 3.690671  | 4.691338  | -2.163876 |
| H            | -5.732699      | 0.919431     | -1.694659    | H   | 1.679735  | 4.191722  | -3.660811 |
| H            | -7.170203      | 0.247564     | -0.898486    | H   | -0.346524 | 2.776207  | -4.062536 |
| H            | -6.239828      | 1.547888     | -0.122192    | H   | -0.897444 | 0.957394  | -2.477583 |
| C            | -5.913513      | -0.788817    | 1.342850     | C   | 2.594245  | 0.038549  | 1.908243  |
| H            | -6.914251      | -1.209092    | 1.198473     | C   | 1.826707  | -1.246787 | 2.125990  |
| H            | -5.296459      | -1.528858    | 1.859653     | C   | 1.488831  | -1.640258 | 3.439693  |
| H            | -6.003183      | 0.093942     | 1.984806     | C   | 1.484533  | -2.056310 | 0.997672  |
| C            | -5.181434      | -1.678884    | -0.907405    | C   | 0.849599  | -2.866004 | 3.631221  |
| H            | -4.712040      | -1.445001    | -1.867727    | C   | 0.878230  | -3.309094 | 1.256281  |
| H            | -4.582601      | -2.449179    | -0.416283    | C   | 0.570226  | -3.706479 | 2.549726  |
| H            | -6.179406      | -2.085539    | -1.102138    | H   | 0.586353  | -3.177142 | 4.638292  |
| C            | -3.913666      | 0.166873     | 0.246085     | H   | 0.686630  | -3.983715 | 0.430179  |
| O            | -3.623905      | 1.346617     | 0.145656     | H   | 0.117192  | -4.678516 | 2.721151  |
| O            | -3.039597      | -0.768997    | 0.648404     | O   | 3.652528  | 0.292161  | 2.493933  |
| H            | -2.191054      | -0.336325    | 0.878362     | H   | 4.232494  | 2.326141  | 1.411202  |
|              |                |              |              | C   | 1.790743  | -0.743967 | 4.618479  |
|              |                |              |              | H   | 2.868041  | -0.608903 | 4.740512  |
| E            |                |              |              | H   | 1.361814  | 0.253878  | 4.473136  |
| Energy =     | -2172.47093528 | ZPE =        | -2171.809393 | H = | 1.377143  | -1.161102 | 5.539726  |
| -2171.765977 | G =            | -2171.885026 |              | Co  | 0.551129  | -0.189135 | 0.110459  |
| C            | -2.183652      | -1.472233    | -0.238140    |     |           |           |           |

|                                                |           |           |           |                                                |           |           |           |
|------------------------------------------------|-----------|-----------|-----------|------------------------------------------------|-----------|-----------|-----------|
| H                                              | -1.050545 | -0.714610 | -1.640601 | N                                              | -1.621929 | -1.726635 | -0.393396 |
| C                                              | -2.293487 | 2.901156  | 1.514807  | H                                              | -5.385422 | -4.091023 | -1.796222 |
| C                                              | -3.587114 | 2.152141  | 1.874796  | H                                              | -6.496381 | -1.991670 | -2.493480 |
| H                                              | -3.599909 | 1.879518  | 2.935244  | H                                              | -6.399735 | 0.580571  | -2.656032 |
| H                                              | -4.452029 | 2.792814  | 1.677006  | H                                              | -5.086022 | 2.663861  | -2.207860 |
| H                                              | -3.685992 | 1.239454  | 1.286468  | H                                              | -2.811226 | 2.477203  | -1.167909 |
| C                                              | -2.306566 | 3.285610  | 0.012654  | C                                              | -1.199865 | -2.436207 | 0.680292  |
| H                                              | -3.145740 | 3.960598  | -0.183633 | C                                              | -0.112265 | -1.732047 | 1.474418  |
| H                                              | -1.380291 | 3.794558  | -0.272770 | C                                              | 1.148782  | -2.339091 | 1.602681  |
| H                                              | -2.419999 | 2.397875  | -0.614496 | C                                              | -0.360905 | -0.463374 | 2.070051  |
| C                                              | -2.137191 | 4.161383  | 2.381254  | C                                              | 2.154336  | -1.681504 | 2.330966  |
| H                                              | -2.079542 | 3.906046  | 3.444141  | C                                              | 0.669940  | 0.162543  | 2.788766  |
| H                                              | -1.237355 | 4.721161  | 2.115838  | C                                              | 1.920230  | -0.439127 | 2.915769  |
| H                                              | -3.004374 | 4.812987  | 2.234453  | H                                              | 3.133750  | -2.145055 | 2.410434  |
| C                                              | -1.107676 | 1.954942  | 1.665523  | H                                              | 0.482135  | 1.130478  | 3.242061  |
| O                                              | -1.169996 | 0.755327  | 1.402905  | H                                              | 2.711841  | 0.061650  | 3.465812  |
| O                                              | 0.036851  | 2.542897  | 2.011265  | O                                              | -1.636906 | -3.533467 | 1.079723  |
| H                                              | 0.755944  | 1.872751  | 1.875122  | H                                              | -3.113464 | -4.065837 | -0.782874 |
| <b>E*</b>                                      |           |           |           | C                                              | 1.494477  | -3.655511 | 0.940626  |
| Energy = -2172.01981138 ZPE = -2171.371483 H = |           |           |           | H                                              | 1.630151  | -4.443497 | 1.691224  |
| -2171.328239 G = -2171.446588                  |           |           |           | H                                              | 0.718609  | -3.992586 | 0.253040  |
| C                                              | 0.773777  | 2.266854  | -0.684862 | H                                              | 2.438464  | -3.551631 | 0.396595  |
| C                                              | 1.409249  | 3.505897  | -0.715950 | Co                                             | -1.019973 | 0.121329  | -0.555341 |
| C                                              | 2.588817  | 3.672537  | -1.477504 | C                                              | 6.155886  | -0.313753 | 0.071376  |
| C                                              | 3.150866  | 2.633057  | -2.196700 | C                                              | 7.188666  | -1.400231 | -0.256668 |
| C                                              | 2.559226  | 1.342544  | -2.153071 | H                                              | 6.993101  | -1.844537 | -1.236733 |
| C                                              | 1.380558  | 1.174462  | -1.379467 | H                                              | 8.192953  | -0.965129 | -0.267604 |
| N                                              | 0.754261  | -0.049776 | -1.227067 | H                                              | 7.165208  | -2.202554 | 0.485944  |
| C                                              | 1.311606  | -1.118797 | -1.814951 | C                                              | 6.434019  | 0.286001  | 1.468149  |
| C                                              | 2.459918  | -1.026864 | -2.623149 | H                                              | 7.435947  | 0.727106  | 1.485208  |
| C                                              | 3.080700  | 0.193492  | -2.807919 | H                                              | 5.707093  | 1.063987  | 1.713770  |
| N                                              | -0.416241 | 1.905319  | -0.057322 | H                                              | 6.389474  | -0.485358 | 2.244538  |
| H                                              | 3.057255  | 4.653183  | -1.503481 | C                                              | 6.196644  | 0.802767  | -0.993693 |
| H                                              | 4.050175  | 2.784068  | -2.786701 | H                                              | 6.013443  | 0.396207  | -1.993145 |
| H                                              | 3.970015  | 0.283206  | -3.424250 | H                                              | 5.443610  | 1.569322  | -0.797984 |
| H                                              | 2.855233  | -1.929216 | -3.077841 | H                                              | 7.185931  | 1.272285  | -0.993660 |
| H                                              | 0.808409  | -2.062086 | -1.636286 | C                                              | 4.758995  | -0.937032 | 0.090982  |
| C                                              | -0.775122 | 2.392716  | 1.154626  | O                                              | 4.512718  | -2.116242 | -0.093854 |
| C                                              | -1.889143 | 1.576082  | 1.792368  | O                                              | 3.806980  | -0.028110 | 0.363540  |
| C                                              | -3.137845 | 2.190141  | 1.998144  | H                                              | 2.946976  | -0.485570 | 0.409168  |
| C                                              | -1.710066 | 0.197352  | 2.083678  | <b>E-q</b>                                     |           |           |           |
| C                                              | -4.215114 | 1.414524  | 2.447555  | Energy = -2172.48306436 ZPE = -2171.823083 H = |           |           |           |
| C                                              | -2.810361 | -0.546044 | 2.543563  | -2171.779552 G = -2171.898197                  |           |           |           |
| C                                              | -4.057372 | 0.052814  | 2.704056  | C                                              | -3.270409 | 0.714865  | -1.130253 |
| H                                              | -5.185235 | 1.883936  | 2.590247  | C                                              | -4.390834 | -0.035507 | -1.433017 |
| H                                              | -2.678293 | -1.600418 | 2.765307  | C                                              | -5.564105 | 0.110722  | -0.652330 |
| H                                              | -4.901221 | -0.537580 | 3.050753  | C                                              | -5.622286 | 0.986369  | 0.409609  |
| O                                              | -0.289937 | 3.377079  | 1.746136  | C                                              | -4.487095 | 1.774715  | 0.738530  |
| H                                              | 0.985649  | 4.330974  | -0.158913 | C                                              | -3.301100 | 1.648404  | -0.040681 |
| C                                              | -3.335099 | 3.661750  | 1.708288  | N                                              | -2.166788 | 2.358023  | 0.215789  |
| H                                              | -2.642669 | 4.270240  | 2.295181  | C                                              | -2.165149 | 3.192134  | 1.239663  |
| H                                              | -3.134685 | 3.891468  | 0.655843  | C                                              | -3.287944 | 3.390713  | 2.080088  |
| H                                              | -4.359957 | 3.971831  | 1.929742  | C                                              | -4.444713 | 2.688018  | 1.824709  |
| C                                              | -2.889263 | -1.942994 | -0.934067 | N                                              | -2.032111 | 0.637754  | -1.773086 |
| C                                              | -3.577899 | -3.142130 | -1.099722 | H                                              | -6.431254 | -0.491915 | -0.903855 |
| C                                              | -4.874227 | -3.140557 | -1.665492 | H                                              | -6.525067 | 1.083279  | 1.004974  |
| C                                              | -5.501868 | -1.972932 | -2.056627 | H                                              | -5.325719 | 2.815279  | 2.447372  |
| C                                              | -4.844277 | -0.725738 | -1.880888 | H                                              | -3.222900 | 4.088979  | 2.907368  |
| C                                              | -3.539614 | -0.728677 | -1.316778 | H                                              | -1.238599 | 3.734560  | 1.417965  |
| N                                              | -2.832909 | 0.430067  | -1.072323 | C                                              | -1.507282 | -0.384684 | -2.509604 |
| C                                              | -3.402266 | 1.596885  | -1.391014 | C                                              | -0.005538 | -0.261928 | -2.738403 |
| C                                              | -4.681550 | 1.684863  | -1.971272 | C                                              | 0.418945  | 0.804269  | -3.581388 |
| C                                              | -5.407062 | 0.535227  | -2.217109 | C                                              | 0.943994  | -1.226072 | -2.260889 |

|    |           |           |           |
|----|-----------|-----------|-----------|
| C  | 1.767687  | 0.903765  | -3.928093 |
| C  | 2.287761  | -1.088316 | -2.677054 |
| C  | 2.695264  | -0.039191 | -3.487505 |
| H  | 2.088312  | 1.716816  | -4.572308 |
| H  | 3.012064  | -1.822064 | -2.345130 |
| H  | 3.735561  | 0.038295  | -3.786978 |
| O  | -2.184168 | -1.289555 | -2.989622 |
| H  | -4.355911 | -0.741097 | -2.251140 |
| C  | -0.554482 | 1.824265  | -4.133735 |
| H  | -1.489046 | 1.362754  | -4.464021 |
| H  | -0.812174 | 2.582447  | -3.386464 |
| H  | -0.111582 | 2.343435  | -4.986318 |
| C  | 3.296276  | 0.410191  | 0.980645  |
| C  | 4.533196  | 0.117509  | 1.585863  |
| C  | 5.382871  | 1.157287  | 1.965434  |
| C  | 5.019866  | 2.490764  | 1.761776  |
| C  | 3.784509  | 2.824919  | 1.164580  |
| C  | 2.916461  | 1.757644  | 0.765764  |
| N  | 1.689095  | 2.022167  | 0.160146  |
| C  | 1.293581  | 3.333926  | -0.033700 |
| C  | 2.087521  | 4.394736  | 0.338595  |
| C  | 3.345893  | 4.167651  | 0.937846  |
| N  | 2.319561  | -0.566796 | 0.620284  |
| H  | 6.338197  | 0.923582  | 2.427776  |
| H  | 5.687786  | 3.293797  | 2.063558  |
| H  | 3.983268  | 4.994881  | 1.233623  |
| H  | 1.734065  | 5.407146  | 0.165303  |
| H  | 0.319717  | 3.459023  | -0.494515 |
| C  | 2.646270  | -1.813041 | 0.156938  |
| C  | 1.435468  | -2.659241 | -0.216899 |
| C  | 1.143301  | -3.758535 | 0.617788  |
| C  | 0.628068  | -2.383543 | -1.352471 |
| C  | 0.046807  | -4.570622 | 0.310547  |
| C  | -0.436125 | -3.250622 | -1.652023 |
| C  | -0.728370 | -4.328327 | -0.823235 |
| H  | -0.190178 | -5.408502 | 0.960580  |
| H  | -1.028726 | -3.070467 | -2.537286 |
| H  | -1.557488 | -4.985821 | -1.066844 |
| O  | 3.779317  | -2.294135 | 0.048541  |
| H  | 4.813707  | -0.916100 | 1.737136  |
| C  | 1.973708  | -4.042191 | 1.848722  |
| H  | 3.025324  | -4.182619 | 1.587871  |
| H  | 1.922000  | -3.205408 | 2.553959  |
| H  | 1.613134  | -4.936012 | 2.363006  |
| Co | 0.755771  | 0.370784  | -0.240122 |
| H  | -1.413794 | 1.366388  | -1.432308 |
| C  | -1.969509 | -1.546628 | 2.529374  |
| C  | -3.024735 | -1.976077 | 1.495991  |
| H  | -2.638918 | -2.771177 | 0.850732  |
| H  | -3.908570 | -2.351867 | 2.019768  |
| H  | -3.326069 | -1.141353 | 0.863815  |
| C  | -2.503026 | -0.360588 | 3.373602  |
| H  | -3.410940 | -0.675396 | 3.896894  |
| H  | -1.767338 | -0.043324 | 4.118722  |
| H  | -2.751522 | 0.494207  | 2.739212  |
| C  | -1.596045 | -2.729470 | 3.440497  |
| H  | -1.178907 | -3.554092 | 2.854301  |
| H  | -0.862629 | -2.439566 | 4.195763  |
| H  | -2.495242 | -3.089037 | 3.949193  |
| C  | -0.741059 | -1.019847 | 1.807732  |
| O  | -0.833474 | -0.481300 | 0.683890  |
| O  | 0.392739  | -1.123631 | 2.456119  |
| H  | 1.174146  | -0.849903 | 1.860128  |

| E-s                                            |           |           |           |
|------------------------------------------------|-----------|-----------|-----------|
| Energy = -2172.47093528 ZPE = -2171.809393 H = |           |           |           |
| -2171.765977 G = -2171.885026                  |           |           |           |
| C                                              | -2.183652 | -1.472233 | -0.238140 |
| C                                              | -2.416519 | -2.272675 | 0.855663  |
| C                                              | -3.711618 | -2.354657 | 1.419573  |
| C                                              | -4.763851 | -1.637306 | 0.893469  |
| C                                              | -4.555720 | -0.806913 | -0.238014 |
| C                                              | -3.251805 | -0.728150 | -0.816782 |
| N                                              | -2.978145 | 0.044741  | -1.905742 |
| C                                              | -3.957281 | 0.757053  | -2.433500 |
| C                                              | -5.280631 | 0.759202  | -1.930037 |
| C                                              | -5.576268 | -0.024514 | -0.837718 |
| N                                              | -0.879099 | -1.311353 | -0.823237 |
| H                                              | -3.866372 | -2.991123 | 2.285200  |
| H                                              | -5.755217 | -1.695134 | 1.332926  |
| H                                              | -6.580014 | -0.051068 | -0.422990 |
| H                                              | -6.036944 | 1.371920  | -2.408216 |
| H                                              | -3.702905 | 1.367856  | -3.297251 |
| C                                              | -0.270570 | -2.538091 | -1.436172 |
| C                                              | 1.172650  | -2.404535 | -1.528898 |
| C                                              | 1.837676  | -2.802340 | -2.720139 |
| C                                              | 1.873040  | -1.720133 | -0.445263 |
| C                                              | 3.171435  | -2.453677 | -2.893077 |
| C                                              | 3.256636  | -1.406766 | -0.698927 |
| C                                              | 3.862266  | -1.743146 | -1.885887 |
| H                                              | 3.682686  | -2.723193 | -3.812246 |
| H                                              | 3.843485  | -0.927660 | 0.075906  |
| H                                              | 4.906499  | -1.482570 | -2.040484 |
| O                                              | -0.996925 | -3.425950 | -1.856983 |
| H                                              | -1.598248 | -2.827723 | 1.295107  |
| C                                              | 1.109786  | -3.532224 | -3.825576 |
| H                                              | 0.750556  | -4.507644 | -3.486779 |
| H                                              | 0.223790  | -2.980159 | -4.156752 |
| H                                              | 1.767560  | -3.677126 | -4.686413 |
| C                                              | 2.538617  | 1.804747  | 0.219366  |
| C                                              | 3.676594  | 2.545275  | 0.509709  |
| C                                              | 4.087768  | 3.576250  | -0.367680 |
| C                                              | 3.375199  | 3.885970  | -1.507821 |
| C                                              | 2.209891  | 3.143311  | -1.835906 |
| C                                              | 1.809317  | 2.085904  | -0.973710 |
| N                                              | 0.717977  | 1.286419  | -1.236353 |
| C                                              | -0.013033 | 1.562677  | -2.312573 |
| C                                              | 0.297557  | 2.609552  | -3.206344 |
| C                                              | 1.409390  | 3.389465  | -2.980376 |
| N                                              | 1.956333  | 0.785970  | 0.970636  |
| H                                              | 4.981515  | 4.142320  | -0.122115 |
| H                                              | 3.690671  | 4.691338  | -2.163876 |
| H                                              | 1.679735  | 4.191722  | -3.660811 |
| H                                              | -0.346524 | 2.776207  | -4.062536 |
| H                                              | -0.897444 | 0.957394  | -2.477583 |
| C                                              | 2.594245  | 0.038549  | 1.908243  |
| C                                              | 1.826707  | -1.246787 | 2.125990  |
| C                                              | 1.488831  | -1.640258 | 3.439693  |
| C                                              | 1.484533  | -2.056310 | 0.997672  |
| C                                              | 0.849599  | -2.866004 | 3.631221  |
| C                                              | 0.878230  | -3.309094 | 1.256281  |
| C                                              | 0.570226  | -3.706479 | 2.549726  |
| H                                              | 0.586353  | -3.177142 | 4.638292  |
| H                                              | 0.686630  | -3.983715 | 0.430179  |
| H                                              | 0.117192  | -4.678516 | 2.721151  |
| O                                              | 3.652528  | 0.292161  | 2.493933  |
| H                                              | 4.232494  | 2.326141  | 1.411202  |
| C                                              | 1.790743  | -0.743967 | 4.618479  |

|    |           |           |           |   |           |           |           |
|----|-----------|-----------|-----------|---|-----------|-----------|-----------|
| H  | 2.868041  | -0.608903 | 4.740512  | N | 1.479945  | 2.165725  | -0.063365 |
| H  | 1.361814  | 0.253878  | 4.473136  | C | 0.878895  | 3.339700  | -0.227860 |
| H  | 1.377143  | -1.161102 | 5.539726  | C | 1.501025  | 4.564890  | 0.086745  |
| Co | 0.551129  | -0.189135 | 0.110459  | C | 2.793000  | 4.551856  | 0.566265  |
| H  | -1.050545 | -0.714610 | -1.640601 | N | 2.497313  | -0.257216 | 0.435992  |
| C  | -2.293487 | 2.901156  | 1.514807  | H | 6.402394  | 1.904429  | 1.740272  |
| C  | -3.587114 | 2.152141  | 1.874796  | H | 5.348257  | 4.132408  | 1.463502  |
| H  | -3.599909 | 1.879518  | 2.935244  | H | 3.308557  | 5.478374  | 0.802998  |
| H  | -4.452029 | 2.792814  | 1.677006  | H | 0.961223  | 5.493446  | -0.062754 |
| H  | -3.685992 | 1.239454  | 1.286468  | H | -0.130246 | 3.303366  | -0.628518 |
| C  | -2.306566 | 3.285610  | 0.012654  | C | 2.927151  | -1.546941 | 0.321415  |
| H  | -3.145740 | 3.960598  | -0.183633 | C | 1.784646  | -2.551120 | 0.250548  |
| H  | -1.380291 | 3.794558  | -0.272770 | C | 1.648779  | -3.460986 | 1.317503  |
| H  | -2.419999 | 2.397875  | -0.614496 | C | 0.865107  | -2.565321 | -0.826802 |
| C  | -2.137191 | 4.161383  | 2.381254  | C | 0.603741  | -4.392277 | 1.284839  |
| H  | -2.079542 | 3.906046  | 3.444141  | C | -0.145376 | -3.537741 | -0.847234 |
| H  | -1.237355 | 4.721161  | 2.115838  | C | -0.277172 | -4.440672 | 0.205421  |
| H  | -3.004374 | 4.812987  | 2.234453  | H | 0.486160  | -5.085991 | 2.113208  |
| C  | -1.107676 | 1.954942  | 1.665523  | H | -0.827123 | -3.572871 | -1.685565 |
| O  | -1.169996 | 0.755327  | 1.402905  | H | -1.068534 | -5.184504 | 0.181610  |
| O  | 0.036851  | 2.542897  | 2.011265  | O | 4.098433  | -1.954305 | 0.294864  |
| H  | 0.755944  | 1.872751  | 1.875122  | H | 5.147031  | -0.171282 | 1.240393  |

**E-t**

Energy = -2172.52830396 ZPE = -2171.86683 H = -2171.823228 G = -2171.942555

|   |           |           |           |
|---|-----------|-----------|-----------|
| C | -3.443842 | 0.130782  | -1.105831 |
| C | -4.440768 | -0.807401 | -1.310057 |
| C | -5.680923 | -0.677789 | -0.639385 |
| C | -5.930826 | 0.365031  | 0.224867  |
| C | -4.931103 | 1.348751  | 0.448117  |
| C | -3.680414 | 1.246133  | -0.230119 |
| N | -2.674954 | 2.152397  | -0.064881 |
| C | -2.869978 | 3.158965  | 0.767720  |
| C | -4.068768 | 3.349359  | 1.496567  |
| C | -5.095654 | 2.447499  | 1.331104  |
| N | -2.160664 | 0.091916  | -1.650990 |
| H | -6.443754 | -1.430635 | -0.813173 |
| H | -6.881954 | 0.448777  | 0.741915  |
| H | -6.031987 | 2.559887  | 1.870562  |
| H | -4.161720 | 4.195494  | 2.168690  |
| H | -2.046503 | 3.860814  | 0.884134  |
| C | -1.499183 | -0.960166 | -2.213832 |
| C | -0.014029 | -0.723402 | -2.472278 |
| C | 0.283673  | 0.149502  | -3.581635 |
| C | 1.026878  | -1.580852 | -1.950476 |
| C | 1.561143  | 0.155292  | -4.128420 |
| C | 2.294023  | -1.557080 | -2.596159 |
| C | 2.560156  | -0.708771 | -3.652694 |
| H | 1.774865  | 0.817047  | -4.962623 |
| H | 3.067451  | -2.222260 | -2.229122 |
| H | 3.539359  | -0.716479 | -4.121311 |
| O | -2.058661 | -1.991720 | -2.582863 |
| H | -4.254205 | -1.646000 | -1.965523 |
| C | -0.782773 | 1.036878  | -4.186827 |
| H | -1.674761 | 0.464859  | -4.462409 |
| H | -1.106602 | 1.817574  | -3.491564 |
| H | -0.403289 | 1.526207  | -5.086527 |
| C | 3.356680  | 0.827754  | 0.645947  |
| C | 4.672998  | 0.789727  | 1.100170  |
| C | 5.379076  | 1.981216  | 1.383422  |
| C | 4.801162  | 3.223647  | 1.231472  |
| C | 3.467810  | 3.317899  | 0.755908  |
| C | 2.754937  | 2.121811  | 0.443682  |

|    |           |           |           |
|----|-----------|-----------|-----------|
| C  | 0.878895  | 3.339700  | -0.227860 |
| C  | 1.501025  | 4.564890  | 0.086745  |
| C  | 2.793000  | 4.551856  | 0.566265  |
| N  | 2.497313  | -0.257216 | 0.435992  |
| H  | 6.402394  | 1.904429  | 1.740272  |
| H  | 5.348257  | 4.132408  | 1.463502  |
| H  | 3.308557  | 5.478374  | 0.802998  |
| H  | 0.961223  | 5.493446  | -0.062754 |
| H  | -0.130246 | 3.303366  | -0.628518 |
| C  | 2.927151  | -1.546941 | 0.321415  |
| C  | 1.784646  | -2.551120 | 0.250548  |
| C  | 1.648779  | -3.460986 | 1.317503  |
| C  | 0.865107  | -2.565321 | -0.826802 |
| C  | 0.603741  | -4.392277 | 1.284839  |
| C  | -0.145376 | -3.537741 | -0.847234 |
| C  | -0.277172 | -4.440672 | 0.205421  |
| H  | 0.486160  | -5.085991 | 2.113208  |
| H  | -0.827123 | -3.572871 | -1.685565 |
| H  | -1.068534 | -5.184504 | 0.181610  |
| O  | 4.098433  | -1.954305 | 0.294864  |
| H  | 5.147031  | -0.171282 | 1.240393  |
| C  | 2.571290  | -3.400037 | 2.513668  |
| H  | 3.616043  | -3.508381 | 2.213702  |
| H  | 2.476851  | -2.430818 | 3.017017  |
| H  | 2.324731  | -4.180603 | 3.237765  |
| Co | 0.857472  | 0.368603  | -0.768623 |
| H  | -1.607250 | 0.865497  | -1.296757 |
| C  | -1.588769 | -0.987260 | 2.807268  |
| C  | -2.632483 | -1.786680 | 2.007938  |
| H  | -2.187972 | -2.691961 | 1.582814  |
| H  | -3.453405 | -2.080882 | 2.669483  |
| H  | -3.040349 | -1.194016 | 1.188770  |
| C  | -2.228043 | 0.309373  | 3.360411  |
| H  | -3.051644 | 0.052309  | 4.034243  |
| H  | -1.498111 | 0.901138  | 3.922164  |
| H  | -2.626442 | 0.925692  | 2.550302  |
| C  | -1.031365 | -1.842576 | 3.958309  |
| H  | -0.536571 | -2.738730 | 3.570822  |
| H  | -0.307371 | -1.285664 | 4.557357  |
| H  | -1.852487 | -2.156672 | 4.610712  |
| C  | -0.469147 | -0.548407 | 1.866715  |
| O  | -0.673728 | -0.311323 | 0.672051  |
| O  | 0.717581  | -0.401243 | 2.425950  |
| H  | 1.397796  | -0.246393 | 1.680464  |

**E-t'**

Energy = -2172.05422214 ZPE = -2171.406884 H = -2171.362983 G = -2171.485405

|   |          |           |          |
|---|----------|-----------|----------|
| C | 1.553511 | -0.715500 | 2.215905 |
| C | 2.495190 | -1.458163 | 2.933300 |
| C | 3.661896 | -0.851001 | 3.451789 |
| C | 3.925255 | 0.491700  | 3.282242 |
| C | 3.004626 | 1.290959  | 2.555654 |
| C | 1.829214 | 0.687134  | 2.020755 |
| N | 0.925796 | 1.402971  | 1.280690 |
| C | 1.137435 | 2.698762  | 1.078701 |
| C | 2.264938 | 3.379583  | 1.579879 |
| C | 3.197740 | 2.676676  | 2.313081 |
| N | 0.362673 | -1.159680 | 1.647464 |
| H | 4.365662 | -1.470723 | 4.001963 |
| H | 4.823647 | 0.948384  | 3.687557 |
| H | 4.084614 | 3.165919  | 2.706836 |
| H | 2.386639 | 4.438388  | 1.376322 |

|    |           |           |           |                         |                   |           |           |
|----|-----------|-----------|-----------|-------------------------|-------------------|-----------|-----------|
| H  | 0.385654  | 3.213613  | 0.488511  | O                       | 1.970148          | 1.745383  | -1.850158 |
| C  | -0.104398 | -2.419710 | 1.807781  | O                       | 2.463352          | -0.190708 | -0.811600 |
| C  | -1.469906 | -2.621719 | 1.178228  | H                       | 1.493504          | -0.202002 | -0.661481 |
| C  | -2.594109 | -2.728139 | 2.022314  |                         |                   |           |           |
| C  | -1.616972 | -2.688893 | -0.219539 | <b>F-q</b>              |                   |           |           |
| C  | -3.858694 | -2.890459 | 1.447247  | Energy = -491.521764213 | ZPE = -491.386181 | H = -     |           |
| C  | -2.898627 | -2.855299 | -0.768077 | 491.375395              | G = -491.424179   |           |           |
| C  | -4.013561 | -2.952714 | 0.059795  | C                       | -0.146567         | 0.022693  | -0.001507 |
| H  | -4.730424 | -2.964799 | 2.092897  | O                       | 0.496321          | -1.081744 | -0.001704 |
| H  | -3.009811 | -2.885929 | -1.847365 | O                       | 0.513387          | 1.113740  | -0.001812 |
| H  | -5.002222 | -3.080660 | -0.372248 | C                       | -1.675075         | 0.011326  | 0.000042  |
| O  | 0.420582  | -3.373746 | 2.416047  | C                       | -2.143299         | -0.750801 | -1.258420 |
| H  | 2.313168  | -2.511270 | 3.088140  | H                       | -1.822033         | -0.238676 | -2.171842 |
| C  | -2.432109 | -2.625431 | 3.521197  | H                       | -1.737459         | -1.765482 | -1.271211 |
| H  | -1.741487 | -3.388231 | 3.891709  | H                       | -3.236460         | -0.811205 | -1.269771 |
| H  | -2.005157 | -1.653405 | 3.797738  | C                       | -2.139635         | -0.741789 | 1.265414  |
| H  | -3.391048 | -2.734203 | 4.034701  | H                       | -1.733689         | -1.756345 | 1.284325  |
| C  | -2.655898 | 1.261533  | -1.370039 | H                       | -1.815740         | -0.223046 | 2.174161  |
| C  | -3.474786 | 1.581531  | -2.461302 | H                       | -3.232753         | -0.802170 | 1.280359  |
| C  | -4.449099 | 2.600248  | -2.380512 | C                       | -2.230430         | 1.442307  | -0.004155 |
| C  | -4.650955 | 3.331596  | -1.229621 | H                       | -1.897206         | 1.997225  | 0.877247  |
| C  | -3.853392 | 3.053539  | -0.090788 | H                       | -1.900200         | 1.990861  | -0.890683 |
| C  | -2.863889 | 2.025124  | -0.162226 | H                       | -3.325009         | 1.414594  | -0.002263 |
| N  | -2.072585 | 1.723694  | 0.914295  | Co                      | 2.319738          | 0.001328  | 0.000354  |
| C  | -2.218635 | 2.412310  | 2.043443  |                         |                   |           |           |
| C  | -3.168211 | 3.440826  | 2.198917  | <b>F-s</b>              |                   |           |           |
| C  | -3.985229 | 3.757994  | 1.134816  | Energy = -491.488831502 | ZPE = -491.352741 | H = -     |           |
| N  | -1.643428 | 0.301393  | -1.310868 | 491.343137              | G = -491.386448   |           |           |
| H  | -5.052990 | 2.806176  | -3.260988 | C                       | -0.094518         | 0.022984  | 0.000375  |
| H  | -5.403464 | 4.113308  | -1.177449 | O                       | 0.575405          | -1.069389 | 0.000462  |
| H  | -4.730597 | 4.544592  | 1.215870  | O                       | 0.594361          | 1.100776  | 0.000554  |
| H  | -3.242119 | 3.964711  | 3.146277  | C                       | -1.614462         | 0.011720  | -0.000133 |
| H  | -1.548067 | 2.139083  | 2.853317  | C                       | -2.079506         | -0.749284 | -1.261235 |
| C  | -1.481538 | -0.598823 | -2.311372 | H                       | -1.757563         | -0.234883 | -2.172740 |
| C  | -0.358099 | -1.601599 | -2.122924 | H                       | -1.672296         | -1.763448 | -1.275075 |
| C  | 0.723491  | -1.592160 | -3.030126 | H                       | -3.172423         | -0.811188 | -1.272584 |
| C  | -0.434478 | -2.593903 | -1.124200 | C                       | -2.080206         | -0.744060 | 1.263946  |
| C  | 1.727990  | -2.556537 | -2.897020 | H                       | -1.672817         | -1.758087 | 1.282367  |
| C  | 0.597832  | -3.537696 | -1.006121 | H                       | -1.759016         | -0.225693 | 2.173466  |
| C  | 1.675622  | -3.517921 | -1.886855 | H                       | -3.173122         | -0.806160 | 1.274785  |
| H  | 2.568823  | -2.541308 | -3.585579 | C                       | -2.163275         | 1.445309  | -0.003228 |
| H  | 0.543368  | -4.281316 | -0.217254 | H                       | -1.830030         | 1.997086  | 0.880134  |
| H  | 2.469024  | -4.254392 | -1.793527 | H                       | -1.829697         | 1.993346  | -0.888806 |
| O  | -2.149058 | -0.711655 | -3.363053 | H                       | -3.257629         | 1.420638  | -0.003411 |
| H  | -3.350337 | 1.025958  | -3.377445 | Co                      | 2.183639          | 0.000640  | -0.000171 |
| C  | 0.820249  | -0.537284 | -4.108331 |                         |                   |           |           |
| H  | -0.055134 | -0.568668 | -4.762023 | <b>F-t</b>              |                   |           |           |
| H  | 0.860154  | 0.462653  | -3.664310 | Energy = -491.545263612 | ZPE = -491.409903 | H = -     |           |
| H  | 1.722132  | -0.675154 | -4.711358 | 491.399984              | G = -491.445237   |           |           |
| Co | -0.678573 | 0.273982  | 0.585470  | C                       | -0.133314         | 0.025404  | -0.000484 |
| C  | 4.294746  | 1.008446  | -1.753239 | O                       | 0.489201          | -1.085928 | -0.000353 |
| C  | 4.624411  | 2.398406  | -2.314600 | O                       | 0.507747          | 1.123158  | -0.000379 |
| H  | 4.376834  | 3.180274  | -1.589906 | C                       | -1.670235         | 0.011107  | -0.000081 |
| H  | 5.693125  | 2.463721  | -2.542332 | C                       | -2.139200         | -0.750409 | -1.257714 |
| H  | 4.059360  | 2.597992  | -3.228708 | H                       | -1.821140         | -0.235185 | -2.170942 |
| C  | 4.633009  | -0.085261 | -2.792584 | H                       | -1.724538         | -1.761445 | -1.272523 |
| H  | 5.703615  | -0.058358 | -3.020951 | H                       | -3.232504         | -0.819285 | -1.271676 |
| H  | 4.380288  | -1.077877 | -2.411384 | C                       | -2.137888         | -0.742835 | 1.262673  |
| H  | 4.080963  | 0.073636  | -3.725001 | H                       | -1.723127         | -1.753743 | 1.283223  |
| C  | 5.084833  | 0.756803  | -0.452875 | H                       | -1.818978         | -0.222005 | 2.172416  |
| H  | 4.841488  | 1.506439  | 0.305375  | H                       | -3.231170         | -0.811750 | 1.278120  |
| H  | 4.861232  | -0.227662 | -0.036347 | C                       | -2.235851         | 1.437916  | -0.004030 |
| H  | 6.158660  | 0.812253  | -0.660596 | H                       | -1.905144         | 1.994452  | 0.877360  |
| C  | 2.791431  | 0.923130  | -1.479293 | H                       | -1.906463         | 1.989024  | -0.889345 |



|    |           |          |           |
|----|-----------|----------|-----------|
| H  | -3.331100 | 1.407092 | -0.003180 |
| Co | 2.319167  | 0.001034 | 0.000008  |

**TS1-q**

Energy = -2172.48189731 ZPE = -2171.828445 H =  
 -2171.784851 G = -2171.90529  
 Imaginary frequency: -794.27

**HOPIV**

Energy = -347.054090746 ZPE = -346.906939 H = -  
 346.898734 G = -346.937488

|   |           |           |           |
|---|-----------|-----------|-----------|
| C | -0.570422 | 0.029707  | -0.000043 |
| C | -1.098529 | -0.685479 | 1.262962  |
| H | -0.741846 | -0.193405 | 2.173960  |
| H | -2.192800 | -0.661679 | 1.269689  |
| H | -0.770562 | -1.727913 | 1.282194  |
| C | -1.099392 | -0.688832 | -1.260746 |
| H | -2.193671 | -0.665220 | -1.266705 |
| H | -0.743482 | -0.199094 | -2.173304 |
| H | -0.771272 | -1.731255 | -1.277518 |
| C | -1.011312 | 1.501028  | -0.001814 |
| H | -0.642901 | 2.028640  | 0.882244  |
| H | -0.643306 | 2.026370  | -0.887397 |
| H | -2.104807 | 1.553402  | -0.001637 |
| C | 0.951848  | -0.131478 | -0.000201 |
| O | 1.518560  | -1.208663 | -0.000141 |
| O | 1.630630  | 1.034751  | -0.000160 |
| H | 2.577973  | 0.811778  | -0.000068 |

|   |           |           |           |
|---|-----------|-----------|-----------|
| C | -2.203971 | -2.159544 | -0.505519 |
| C | -2.875643 | -3.394335 | -0.368185 |
| C | -4.202012 | -3.541262 | -0.798298 |
| C | -4.906044 | -2.486635 | -1.361091 |
| C | -4.283030 | -1.216745 | -1.514977 |
| C | -2.936895 | -1.060427 | -1.095115 |
| N | -2.285906 | 0.119171  | -1.199986 |
| C | -2.909496 | 1.177241  | -1.705014 |
| C | -4.240421 | 1.116582  | -2.158216 |
| C | -4.926031 | -0.079954 | -2.062674 |
| N | -0.914905 | -1.902224 | -0.171283 |
| H | -4.684366 | -4.506673 | -0.685146 |
| H | -5.932440 | -2.617147 | -1.688895 |
| H | -5.956137 | -0.159057 | -2.396898 |
| H | -4.709645 | 2.003613  | -2.567987 |
| H | -2.329916 | 2.094781  | -1.732626 |
| C | -0.203230 | -2.802996 | 0.657352  |
| C | 1.200343  | -3.073954 | 0.255180  |
| C | 2.184846  | -3.424019 | 1.210191  |
| C | 1.532506  | -2.988214 | -1.104831 |
| C | 3.483051  | -3.666418 | 0.743169  |
| C | 2.824780  | -3.250635 | -1.547842 |
| C | 3.806065  | -3.586909 | -0.613511 |
| H | 0.760259  | -2.711918 | -1.812973 |
| H | 4.258537  | -3.918970 | 1.461061  |
| H | 3.064594  | -3.183179 | -2.604303 |
| H | 4.824157  | -3.783860 | -0.936563 |
| O | -0.722192 | -3.280460 | 1.663753  |
| H | -2.358836 | -4.235112 | 0.076125  |
| C | 1.901055  | -3.497261 | 2.691173  |
| H | 2.829952  | -3.632601 | 3.251079  |
| H | 1.413417  | -2.582502 | 3.040731  |
| H | 1.223811  | -4.322503 | 2.924101  |
| C | 0.915404  | 2.675312  | -0.904362 |
| C | 1.580800  | 3.898872  | -0.787322 |
| C | 2.521499  | 4.310461  | -1.758564 |
| C | 2.819250  | 3.541778  | -2.864410 |
| C | 2.167094  | 2.292566  | -3.034563 |
| C | 1.228968  | 1.856259  | -2.051932 |
| N | 0.591229  | 0.653349  | -2.163604 |
| C | 0.813869  | -0.114118 | -3.217864 |
| C | 1.714037  | 0.241695  | -4.244664 |
| C | 2.393340  | 1.436230  | -4.143163 |
| N | -0.023558 | 2.129892  | -0.053329 |
| H | 3.018451  | 5.267354  | -1.622182 |
| H | 3.539302  | 3.872911  | -3.606609 |
| H | 3.103455  | 1.738582  | -4.908101 |
| H | 1.862265  | -0.426305 | -5.085939 |
| H | 0.264108  | -1.049767 | -3.257326 |
| C | -0.543148 | 2.750442  | 1.040301  |
| C | -1.545869 | 1.867261  | 1.749824  |
| C | -2.708528 | 2.417236  | 2.335016  |
| C | -1.294922 | 0.474363  | 1.768851  |
| C | -3.623473 | 1.532042  | 2.922946  |
| C | -2.234844 | -0.369567 | 2.380507  |
| C | -3.394671 | 0.153849  | 2.954201  |
| H | 0.166071  | 0.130737  | 2.079858  |
| H | -4.534611 | 1.933478  | 3.361105  |
| H | -2.056902 | -1.441938 | 2.405996  |

**NaOPiv**

Energy = -508.958114038 ZPE = -508.711313 H = -  
 508.700433 G = -508.74762

|    |           |           |           |
|----|-----------|-----------|-----------|
| C  | -0.423159 | 0.028159  | -0.007001 |
| O  | -1.009219 | -1.099390 | -0.008774 |
| O  | -1.026368 | 1.143624  | -0.009061 |
| C  | 1.130199  | 0.010623  | 0.000991  |
| C  | 1.592230  | -0.739796 | 1.266198  |
| H  | 1.276075  | -0.212071 | 2.173633  |
| H  | 1.166205  | -1.745786 | 1.291122  |
| H  | 2.685281  | -0.821076 | 1.288967  |
| C  | 1.607100  | -0.754173 | -1.249859 |
| H  | 1.181882  | -1.760614 | -1.268037 |
| H  | 1.301314  | -0.237279 | -2.167022 |
| H  | 2.700389  | -0.835045 | -1.258994 |
| C  | 1.708376  | 1.431597  | -0.003638 |
| H  | 1.387316  | 1.983744  | -0.891413 |
| H  | 1.376011  | 1.994021  | 0.873385  |
| H  | 2.804278  | 1.396393  | 0.003406  |
| Na | -3.025684 | 0.002308  | 0.005226  |

**OPiv**

Energy = -346.553675072 ZPE = -346.420057 H = -  
 346.411144 G = -346.452523

|   |           |           |           |
|---|-----------|-----------|-----------|
| C | -0.523560 | 0.010156  | -0.000030 |
| C | -0.993145 | -0.748411 | 1.255157  |
| H | -0.698088 | -0.216531 | 2.168507  |
| H | -2.085741 | -0.859641 | 1.272086  |
| H | -0.537475 | -1.741788 | 1.282882  |
| C | -0.994051 | -0.749768 | -1.254039 |
| H | -2.086661 | -0.860994 | -1.270072 |
| H | -0.699638 | -0.218900 | -2.168187 |
| H | -0.538396 | -1.743172 | -1.280995 |
| C | -1.110285 | 1.426886  | -0.000558 |
| H | -0.778566 | 1.986044  | 0.879443  |
| H | -0.779381 | 1.985079  | -0.881490 |
| H | -2.208554 | 1.398983  | -0.000070 |
| C | 1.051778  | 0.032002  | -0.000537 |
| O | 1.608782  | -1.101983 | -0.000102 |
| O | 1.619728  | 1.157699  | -0.000155 |

|    |           |           |           |   |           |           |           |
|----|-----------|-----------|-----------|---|-----------|-----------|-----------|
| H  | -4.122105 | -0.503101 | 3.426124  | C | 1.063396  | 4.874369  | -1.362948 |
| O  | -0.282058 | 3.899391  | 1.442644  | C | 1.287477  | 4.312677  | -2.603788 |
| H  | 1.356983  | 4.528412  | 0.061561  | C | 0.964749  | 2.947023  | -2.819088 |
| C  | -3.014938 | 3.898346  | 2.318783  | C | 0.436995  | 2.198213  | -1.732905 |
| H  | -2.320696 | 4.451177  | 2.956961  | N | 0.118225  | 0.875881  | -1.868503 |
| H  | -2.902516 | 4.319598  | 1.315355  | C | 0.244034  | 0.268851  | -3.034953 |
| H  | -4.036534 | 4.085108  | 2.663552  | C | 0.739253  | 0.945458  | -4.170228 |
| Co | -0.368344 | 0.119035  | -0.284640 | C | 1.111441  | 2.268573  | -4.057253 |
| C  | 2.052910  | 0.076074  | 1.459545  | N | -0.367356 | 1.914848  | 0.458562  |
| O  | 1.693407  | -0.146417 | 0.289017  | H | 1.307641  | 5.919779  | -1.198263 |
| O  | 1.227317  | 0.086525  | 2.466777  | H | 1.697046  | 4.898103  | -3.420717 |
| C  | 3.504591  | 0.436332  | 1.776503  | H | 1.509831  | 2.806554  | -4.912597 |
| C  | 4.007959  | -0.401135 | 2.966747  | H | 0.829047  | 0.410909  | -5.108878 |
| H  | 5.022397  | -0.088813 | 3.235109  | H | -0.047461 | -0.774460 | -3.061485 |
| H  | 3.362194  | -0.273784 | 3.838781  | C | -0.882584 | 2.227146  | 1.683953  |
| H  | 4.036570  | -1.464135 | 2.709249  | C | -1.537032 | 1.017139  | 2.286704  |
| C  | 4.386171  | 0.202251  | 0.541473  | C | -2.613423 | 1.104879  | 3.184719  |
| H  | 4.045440  | 0.806622  | -0.303388 | C | -1.062712 | -0.235916 | 1.814192  |
| H  | 5.421212  | 0.475381  | 0.771193  | C | -3.215913 | -0.101591 | 3.581729  |
| H  | 4.362480  | -0.847884 | 0.237655  | C | -1.698968 | -1.416329 | 2.235032  |
| C  | 3.497119  | 1.939574  | 2.146444  | C | -2.773093 | -1.344221 | 3.120518  |
| H  | 4.517884  | 2.268220  | 2.367723  | H | 0.231096  | -0.301936 | 1.971811  |
| H  | 3.112652  | 2.544458  | 1.317992  | H | -4.058570 | -0.060708 | 4.267520  |
| H  | 2.872652  | 2.121411  | 3.025120  | H | -1.342339 | -2.377943 | 1.878447  |

#### TS1-s

Energy = -2172.51805871 ZPE = -2171.859976 H =

-2171.818121 G = -2171.93056

Imaginary frequency: -996.27

|   |           |           |           |
|---|-----------|-----------|-----------|
| C | -1.721357 | -2.191540 | -1.013580 |
| C | -2.172014 | -3.454944 | -1.402092 |
| C | -3.495983 | -3.649476 | -1.847629 |
| C | -4.408195 | -2.614373 | -1.916462 |
| C | -4.002243 | -1.315350 | -1.527152 |
| C | -2.663694 | -1.123918 | -1.073726 |
| N | -2.220137 | 0.103917  | -0.672046 |
| C | -3.025949 | 1.155001  | -0.719077 |
| C | -4.359531 | 1.050391  | -1.161899 |
| C | -4.845431 | -0.176047 | -1.558219 |
| N | -0.420315 | -1.830717 | -0.663794 |
| H | -3.797388 | -4.649896 | -2.144923 |
| H | -5.424467 | -2.776430 | -2.260779 |
| H | -5.870950 | -0.284104 | -1.899242 |
| H | -4.979329 | 1.939364  | -1.179625 |
| H | -2.610448 | 2.099368  | -0.394896 |
| C | 0.400354  | -2.799355 | -0.117601 |
| C | 1.881079  | -2.651314 | -0.313154 |
| C | 2.795522  | -3.027403 | 0.695975  |
| C | 2.350022  | -2.288090 | -1.581279 |
| C | 4.160430  | -3.019919 | 0.381851  |
| C | 3.711545  | -2.304755 | -1.880984 |
| C | 4.622097  | -2.675099 | -0.891454 |
| H | 1.630394  | -2.007452 | -2.340248 |
| H | 4.876426  | -3.296963 | 1.151467  |
| H | 4.055059  | -2.030693 | -2.874107 |
| H | 5.687538  | -2.690433 | -1.102509 |
| O | -0.022028 | -3.817485 | 0.452029  |
| H | -1.497067 | -4.298613 | -1.358893 |
| C | 2.348592  | -3.413501 | 2.086821  |
| H | 3.203050  | -3.449625 | 2.768395  |
| H | 1.628108  | -2.692050 | 2.480842  |
| H | 1.858325  | -4.390065 | 2.082036  |
| C | 0.194618  | 2.792706  | -0.452724 |
| C | 0.513454  | 4.138151  | -0.286125 |

|    |           |           |           |
|----|-----------|-----------|-----------|
| C  | 1.063396  | 4.874369  | -1.362948 |
| C  | 1.287477  | 4.312677  | -2.603788 |
| C  | 0.964749  | 2.947023  | -2.819088 |
| C  | 0.436995  | 2.198213  | -1.732905 |
| N  | 0.118225  | 0.875881  | -1.868503 |
| C  | 0.244034  | 0.268851  | -3.034953 |
| C  | 0.739253  | 0.945458  | -4.170228 |
| C  | 1.111441  | 2.268573  | -4.057253 |
| N  | -0.367356 | 1.914848  | 0.458562  |
| H  | 1.307641  | 5.919779  | -1.198263 |
| H  | 1.697046  | 4.898103  | -3.420717 |
| H  | 1.509831  | 2.806554  | -4.912597 |
| H  | 0.829047  | 0.410909  | -5.108878 |
| H  | -0.047461 | -0.774460 | -3.061485 |
| C  | -0.882584 | 2.227146  | 1.683953  |
| C  | -1.537032 | 1.017139  | 2.286704  |
| C  | -2.613423 | 1.104879  | 3.184719  |
| C  | -1.062712 | -0.235916 | 1.814192  |
| C  | -3.215913 | -0.101591 | 3.581729  |
| C  | -1.698968 | -1.416329 | 2.235032  |
| C  | -2.773093 | -1.344221 | 3.120518  |
| H  | 0.231096  | -0.301936 | 1.971811  |
| H  | -4.058570 | -0.060708 | 4.267520  |
| H  | -1.342339 | -2.377943 | 1.878447  |
| H  | -3.270289 | -2.250103 | 3.455994  |
| O  | -0.867052 | 3.350736  | 2.207187  |
| H  | 0.328810  | 4.607631  | 0.669389  |
| C  | -3.152850 | 2.418762  | 3.697949  |
| H  | -4.057270 | 2.259018  | 4.291311  |
| H  | -2.411370 | 2.933686  | 4.314419  |
| H  | -3.386691 | 3.099106  | 2.874287  |
| Co | -0.355238 | 0.095985  | -0.126415 |
| C  | 2.084345  | 0.232474  | 1.323073  |
| O  | 1.563868  | 0.183799  | 0.170037  |
| O  | 1.472424  | -0.145512 | 2.373061  |
| C  | 3.465975  | 0.872493  | 1.475337  |
| C  | 4.311145  | 0.073652  | 2.482163  |
| H  | 5.266917  | 0.581976  | 2.645220  |
| H  | 3.795789  | -0.016080 | 3.441346  |
| H  | 4.517224  | -0.931530 | 2.104821  |
| C  | 4.178222  | 0.973183  | 0.119283  |
| H  | 3.590791  | 1.564642  | -0.587779 |
| H  | 5.151512  | 1.456632  | 0.253305  |
| H  | 4.337320  | -0.016403 | -0.314463 |
| C  | 3.185997  | 2.293378  | 2.027643  |
| H  | 4.134300  | 2.823836  | 2.162564  |
| H  | 2.565993  | 2.869450  | 1.333055  |
| H  | 2.673611  | 2.245762  | 2.992597  |

#### TS1-t

Energy = -2172.48692415 ZPE = -2171.83181 H = -

2171.789773 G = -2171.903595

Imaginary frequency: -1011.16

|   |           |           |          |
|---|-----------|-----------|----------|
| C | -2.164319 | 2.003011  | 0.754857 |
| C | -2.791363 | 3.243702  | 0.875366 |
| C | -4.148337 | 3.347825  | 1.249497 |
| C | -4.924392 | 2.236273  | 1.505910 |
| C | -4.338231 | 0.951505  | 1.396596 |
| C | -2.964384 | 0.844148  | 1.024122 |
| N | -2.359454 | -0.366758 | 0.897620 |
| C | -3.035483 | -1.478546 | 1.125665 |
| C | -4.395362 | -1.469957 | 1.503243 |
| C | -5.039602 | -0.258897 | 1.634828 |
| N | -0.800208 | 1.797377  | 0.503391 |



|    |           |           |           |   |           |           |           |
|----|-----------|-----------|-----------|---|-----------|-----------|-----------|
| C  | 1.716534  | -1.551027 | 3.831752  | O | -2.658192 | 2.038750  | 1.580661  |
| C  | 0.326212  | -0.292180 | 2.305670  | H | -1.627824 | 4.125797  | 1.200760  |
| C  | 0.862322  | -1.126558 | 4.857557  | C | -5.201473 | 1.289953  | 0.969424  |
| C  | -0.510075 | 0.154927  | 3.312370  | H | -6.258751 | 1.018041  | 0.897125  |
| C  | -0.226587 | -0.285054 | 4.612990  | H | -4.735051 | 0.691155  | 1.754918  |
| H  | 0.488844  | -2.207953 | 0.170776  | H | -5.126215 | 2.328761  | 1.301235  |
| H  | 1.058862  | -1.459413 | 5.873279  | C | 2.235402  | -1.545478 | -1.485835 |
| H  | -1.337002 | 0.830251  | 3.117476  | C | 3.169303  | -2.483540 | -1.883856 |
| H  | -0.858471 | 0.033415  | 5.438716  | C | 3.775229  | -2.387278 | -3.160654 |
| O  | 3.501161  | -1.663984 | 1.446591  | C | 3.462091  | -1.362280 | -4.025991 |
| H  | 3.773279  | -3.045085 | -0.425291 | C | 2.511251  | -0.379811 | -3.645561 |
| C  | 2.895489  | -2.440162 | 4.151012  | C | 1.873676  | -0.494170 | -2.375774 |
| H  | 2.820131  | -2.824238 | 5.172139  | N | 0.946506  | 0.418611  | -1.947994 |
| H  | 2.961571  | -3.285082 | 3.460082  | C | 0.700072  | 1.480972  | -2.696561 |
| H  | 3.835994  | -1.891072 | 4.050952  | C | 1.287788  | 1.680004  | -3.964891 |
| Co | 0.107329  | 0.322609  | -0.000122 | C | 2.174094  | 0.742218  | -4.445248 |
| C  | -1.487067 | -2.175291 | -0.296072 | N | 1.540793  | -1.549144 | -0.235436 |
| O  | -1.545979 | -0.938248 | -0.060722 | H | 4.504830  | -3.137006 | -3.449727 |
| O  | -0.453198 | -2.894114 | -0.044284 | H | 3.941872  | -1.284522 | -4.996774 |
| C  | -2.690433 | -2.860082 | -0.950478 | H | 2.637298  | 0.858769  | -5.420671 |
| C  | -3.907066 | -2.704127 | -0.017213 | H | 1.032151  | 2.564482  | -4.537039 |
| H  | -4.791171 | -3.149513 | -0.485238 | H | 0.012014  | 2.206943  | -2.276145 |
| H  | -3.738321 | -3.208806 | 0.940260  | C | 2.206066  | -1.891608 | 0.994856  |
| H  | -4.109423 | -1.650910 | 0.173051  | C | 1.343858  | -1.526123 | 2.137367  |
| C  | -2.951400 | -2.116236 | -2.279793 | C | 1.513071  | -2.081198 | 3.429278  |
| H  | -2.094896 | -2.209855 | -2.957097 | C | 0.352730  | -0.559874 | 1.865269  |
| H  | -3.826883 | -2.546194 | -2.777442 | C | 0.642237  | -1.642843 | 4.430535  |
| H  | -3.135714 | -1.055960 | -2.100105 | C | -0.482815 | -0.125041 | 2.892289  |
| C  | -2.409262 | -4.345287 | -1.217275 | C | -0.336081 | -0.677858 | 4.168334  |
| H  | -3.280968 | -4.803090 | -1.696374 | H | 0.661812  | -2.342854 | -0.302813 |
| H  | -1.546385 | -4.472598 | -1.877001 | H | 0.733576  | -2.057947 | 5.430728  |
| H  | -2.204211 | -4.884064 | -0.287985 | H | -1.238059 | 0.630493  | 2.710907  |

#### TS2-s

Energy = -2172.5231586 ZPE = -2171.863642 H = -  
2171.82208 G = -2171.933789

Imaginary frequency: -159.13

|   |           |          |           |
|---|-----------|----------|-----------|
| C | -0.082578 | 2.679892 | 0.811909  |
| C | -0.563586 | 3.934685 | 1.207609  |
| C | 0.312548  | 4.959582 | 1.613373  |
| C | 1.683096  | 4.787106 | 1.648535  |
| C | 2.222334  | 3.536795 | 1.265187  |
| C | 1.333456  | 2.493360 | 0.864302  |
| N | 1.803114  | 1.263048 | 0.494071  |
| C | 3.109648  | 1.032587 | 0.473455  |
| C | 4.051701  | 2.012085 | 0.843769  |
| C | 3.610867  | 3.252531 | 1.245183  |
| N | -0.809711 | 1.630860 | 0.267660  |
| H | -0.114746 | 5.915367 | 1.904079  |
| H | 2.349147  | 5.585196 | 1.959843  |
| H | 4.314415  | 4.024358 | 1.543534  |
| H | 5.106760  | 1.766123 | 0.808839  |
| H | 3.441578  | 0.053244 | 0.159459  |
| C | -2.189224 | 1.615562 | 0.515907  |
| C | -3.121397 | 1.184153 | -0.578934 |
| C | -4.523169 | 1.092745 | -0.366812 |
| C | -2.615038 | 0.964625 | -1.868141 |
| C | -5.338012 | 0.800938 | -1.472451 |
| C | -3.439667 | 0.684489 | -2.951337 |
| C | -4.818876 | 0.609163 | -2.751963 |
| H | -1.547823 | 0.992269 | -1.998996 |
| H | -6.411256 | 0.725035 | -1.319276 |
| H | -3.009789 | 0.521610 | -3.935254 |
| H | -5.486294 | 0.392483 | -3.581234 |

|    |           |           |           |
|----|-----------|-----------|-----------|
| O  | -2.658192 | 2.038750  | 1.580661  |
| H  | -1.627824 | 4.125797  | 1.200760  |
| C  | -5.201473 | 1.289953  | 0.969424  |
| H  | -6.258751 | 1.018041  | 0.897125  |
| H  | -4.735051 | 0.691155  | 1.754918  |
| H  | -5.126215 | 2.328761  | 1.301235  |
| C  | 2.235402  | -1.545478 | -1.485835 |
| C  | 3.169303  | -2.483540 | -1.883856 |
| C  | 3.775229  | -2.387278 | -3.160654 |
| C  | 3.462091  | -1.362280 | -4.025991 |
| C  | 2.511251  | -0.379811 | -3.645561 |
| C  | 1.873676  | -0.494170 | -2.375774 |
| N  | 0.946506  | 0.418611  | -1.947994 |
| C  | 0.700072  | 1.480972  | -2.696561 |
| C  | 1.287788  | 1.680004  | -3.964891 |
| C  | 2.174094  | 0.742218  | -4.445248 |
| N  | 1.540793  | -1.549144 | -0.235436 |
| H  | 4.504830  | -3.137006 | -3.449727 |
| H  | 3.941872  | -1.284522 | -4.996774 |
| H  | 2.637298  | 0.858769  | -5.420671 |
| H  | 1.032151  | 2.564482  | -4.537039 |
| H  | 0.012014  | 2.206943  | -2.276145 |
| C  | 2.206066  | -1.891608 | 0.994856  |
| C  | 1.343858  | -1.526123 | 2.137367  |
| C  | 1.513071  | -2.081198 | 3.429278  |
| C  | 0.352730  | -0.559874 | 1.865269  |
| C  | 0.642237  | -1.642843 | 4.430535  |
| C  | -0.482815 | -0.125041 | 2.892289  |
| C  | -0.336081 | -0.677858 | 4.168334  |
| H  | 0.661812  | -2.342854 | -0.302813 |
| H  | 0.733576  | -2.057947 | 5.430728  |
| H  | -1.238059 | 0.630493  | 2.710907  |
| H  | -0.992284 | -0.353306 | 4.972576  |
| O  | 3.318442  | -2.396811 | 1.036609  |
| H  | 3.445169  | -3.281745 | -1.208704 |
| C  | 2.573073  | -3.109792 | 3.739533  |
| H  | 2.449932  | -3.494522 | 4.755485  |
| H  | 2.533592  | -3.949441 | 3.038858  |
| H  | 3.575825  | -2.682715 | 3.645213  |
| Co | 0.361848  | 0.030604  | 0.034911  |
| C  | -1.364792 | -2.313772 | -0.166125 |
| O  | -1.246555 | -1.052011 | -0.270463 |
| O  | -0.388855 | -3.121680 | -0.265888 |
| C  | -2.767628 | -2.869540 | 0.111493  |
| C  | -3.321280 | -2.135713 | 1.350802  |
| H  | -4.330264 | -2.496605 | 1.576185  |
| H  | -2.688293 | -2.308374 | 2.227646  |
| H  | -3.362521 | -1.061149 | 1.171647  |
| C  | -3.655564 | -2.575984 | -1.114226 |
| H  | -3.272370 | -3.082311 | -2.007191 |
| H  | -4.671754 | -2.940047 | -0.928927 |
| H  | -3.702224 | -1.506500 | -1.314344 |
| C  | -2.706160 | -4.381504 | 0.372330  |
| H  | -3.714223 | -4.760678 | 0.570304  |
| H  | -2.298995 | -4.916360 | -0.489890 |
| H  | -2.075925 | -4.608826 | 1.237019  |

#### TS2-t

Energy = -2172.504207 ZPE = -2171.848432 H = -  
2171.805393 G = -2171.922950

Imaginary frequency: -960.02

|   |           |          |          |
|---|-----------|----------|----------|
| C | -0.149035 | 2.775972 | 0.849819 |
| C | -0.685243 | 3.988282 | 1.297201 |
| C | 0.135982  | 5.021639 | 1.790731 |



|                                                |           |           |           |    |           |           |           |
|------------------------------------------------|-----------|-----------|-----------|----|-----------|-----------|-----------|
| N                                              | -0.088789 | -1.402208 | 0.564571  | C  | 1.606506  | -0.577707 | 1.589338  |
| H                                              | -4.621332 | -2.342502 | 1.234856  | C  | 4.161797  | -1.590510 | 2.127471  |
| H                                              | -5.076160 | -0.004239 | 1.915827  | C  | 1.787573  | -1.937663 | 1.922546  |
| H                                              | -4.176450 | 2.342586  | 2.351521  | C  | 3.054068  | -2.444494 | 2.181435  |
| H                                              | -2.203889 | 3.880951  | 2.347954  | H  | 0.617223  | -0.159688 | 2.221133  |
| H                                              | 0.006023  | 3.013313  | 1.545012  | H  | 5.152389  | -1.994945 | 2.320679  |
| C                                              | 0.283198  | -2.422438 | -0.455157 | H  | 0.918604  | -2.584047 | 2.003572  |
| C                                              | 1.591728  | -2.120081 | -1.039969 | H  | 3.191980  | -3.492511 | 2.431986  |
| C                                              | 2.300228  | -3.073060 | -1.824249 | O  | 3.228200  | 2.632139  | 1.403378  |
| C                                              | 2.080775  | -0.808951 | -0.840558 | H  | 2.200939  | 4.383150  | 0.338669  |
| C                                              | 3.507366  | -2.662243 | -2.388307 | C  | 5.276322  | 0.639461  | 1.756477  |
| C                                              | 3.279022  | -0.430165 | -1.445418 | H  | 5.345079  | 1.142196  | 0.786998  |
| C                                              | 3.987175  | -1.357359 | -2.209003 | H  | 5.250329  | 1.431271  | 2.508697  |
| H                                              | 4.081388  | -3.367339 | -2.982795 | H  | 6.177419  | 0.037544  | 1.903138  |
| H                                              | 3.662791  | 0.574283  | -1.305293 | C  | -1.475092 | -1.825327 | 0.376994  |
| H                                              | 4.927329  | -1.068988 | -2.672906 | C  | -2.145247 | -3.006728 | 0.612025  |
| O                                              | -0.475205 | -3.329035 | -0.739441 | C  | -3.276016 | -3.012047 | 1.466457  |
| H                                              | -2.324177 | -3.054186 | 0.613372  | C  | -3.750052 | -1.846289 | 2.028745  |
| C                                              | 1.795578  | -4.475355 | -2.054949 | C  | -3.088292 | -0.615458 | 1.786280  |
| H                                              | 2.550458  | -5.074852 | -2.570067 | C  | -1.920541 | -0.617432 | 0.976945  |
| H                                              | 1.535743  | -4.969169 | -1.113647 | N  | -1.195136 | 0.521313  | 0.753776  |
| H                                              | 0.881817  | -4.469029 | -2.656901 | C  | -1.612762 | 1.667983  | 1.253698  |
| Co                                             | 0.922250  | 0.282177  | 0.204194  | C  | -2.796154 | 1.772935  | 2.019924  |
| C                                              | 0.015635  | 0.300093  | 4.121602  | C  | -3.516344 | 0.635884  | 2.302837  |
| O                                              | 0.397579  | -0.540585 | 3.214019  | N  | -0.361214 | -1.651449 | -0.544443 |
| O                                              | 0.421155  | 1.468706  | 4.210869  | H  | -3.784068 | -3.952077 | 1.654724  |
| C                                              | -0.978990 | -0.255463 | 5.174650  | H  | -4.633024 | -1.853836 | 2.660641  |
| C                                              | -1.984342 | 0.845885  | 5.549952  | H  | -4.410118 | 0.679611  | 2.918074  |
| H                                              | -2.645034 | 0.504380  | 6.355008  | H  | -3.097421 | 2.742100  | 2.399476  |
| H                                              | -1.460878 | 1.746224  | 5.879047  | H  | -0.978222 | 2.527266  | 1.081021  |
| H                                              | -2.607379 | 1.115268  | 4.690499  | C  | 0.688389  | -2.701176 | -0.731267 |
| C                                              | -1.723324 | -1.494377 | 4.654320  | C  | 1.860901  | -2.096566 | -1.373719 |
| H                                              | -1.023071 | -2.287641 | 4.382154  | C  | 2.836559  | -2.872753 | -2.050128 |
| H                                              | -2.402606 | -1.878284 | 5.424588  | C  | 1.977259  | -0.696070 | -1.228519 |
| H                                              | -2.316895 | -1.255140 | 3.767358  | C  | 3.912172  | -2.186396 | -2.616435 |
| C                                              | -0.134318 | -0.632963 | 6.411428  | C  | 3.071417  | -0.050503 | -1.805044 |
| H                                              | -0.776753 | -1.018233 | 7.211632  | C  | 4.026235  | -0.795150 | -2.500405 |
| H                                              | 0.599014  | -1.407802 | 6.161792  | H  | 4.673181  | -2.744877 | -3.154333 |
| H                                              | 0.405191  | 0.240064  | 6.791574  | H  | 3.186863  | 1.023784  | -1.703120 |
| H                                              | 0.328528  | -1.667999 | 1.466012  | H  | 4.877576  | -0.292541 | -2.953061 |
| <b>TS3ns_2</b>                                 |           |           |           | O  | 0.505301  | -3.846338 | -0.380719 |
| Energy = -2172.46260515 ZPE = -2171.805663 H = |           |           |           | H  | -1.807997 | -3.921166 | 0.144037  |
| -2171.76319 G = -2171.878455                   |           |           |           | C  | 2.742168  | -4.373846 | -2.161591 |
| Imaginary frequency: -703.83                   |           |           |           | H  | 3.522850  | -4.761847 | -2.820773 |
| C                                              | 1.139657  | 2.774248  | -0.588136 | H  | 2.848426  | -4.844246 | -1.179026 |
| C                                              | 1.540441  | 4.105695  | -0.469491 | H  | 1.767844  | -4.689863 | -2.547093 |
| C                                              | 1.088667  | 5.067709  | -1.399876 | Co | 0.564021  | 0.090470  | -0.193904 |
| C                                              | 0.255741  | 4.742344  | -2.452293 | C  | -0.120238 | 1.103339  | 3.911098  |
| C                                              | -0.167976 | 3.398816  | -2.614156 | O  | -0.216905 | -0.059411 | 3.363667  |
| C                                              | 0.273048  | 2.425824  | -1.672275 | O  | 0.431781  | 2.092212  | 3.395771  |
| N                                              | -0.094424 | 1.107926  | -1.768050 | C  | -0.708348 | 1.226078  | 5.344352  |
| C                                              | -0.862164 | 0.722006  | -2.776368 | C  | -1.415225 | 2.584547  | 5.485596  |
| C                                              | -1.339071 | 1.616839  | -3.754982 | H  | -1.758654 | 2.735690  | 6.515605  |
| C                                              | -1.000229 | 2.949362  | -3.669890 | H  | -0.737274 | 3.397087  | 5.214936  |
| N                                              | 1.473375  | 1.700361  | 0.209570  | H  | -2.289037 | 2.640068  | 4.827045  |
| H                                              | 1.415204  | 6.096258  | -1.275752 | C  | -1.688827 | 0.086453  | 5.657372  |
| H                                              | -0.076781 | 5.493249  | -3.161727 | H  | -1.199269 | -0.886656 | 5.573261  |
| H                                              | -1.357705 | 3.662246  | -4.407038 | H  | -2.084001 | 0.192598  | 6.674766  |
| H                                              | -1.965447 | 1.239197  | -4.554767 | H  | -2.532089 | 0.094100  | 4.959542  |
| H                                              | -1.123729 | -0.328075 | -2.841572 | C  | 0.494002  | 1.165892  | 6.310945  |
| C                                              | 2.517579  | 1.668155  | 1.089787  | H  | 0.160563  | 1.277043  | 7.349419  |
| C                                              | 2.748450  | 0.264887  | 1.562272  | H  | 1.018450  | 0.207640  | 6.223185  |
| C                                              | 4.039680  | -0.224495 | 1.830010  | H  | 1.205700  | 1.966540  | 6.087310  |
|                                                |           |           |           | H  | -0.749492 | -1.522524 | -1.480422 |

**TS3-q**

Energy = -2172.43855544 ZPE = -2171.784454 H =

-2171.740457 G = -2171.862838

Imaginary frequency: -1066.54

|   |           |           |           |
|---|-----------|-----------|-----------|
| C | 1.663300  | 3.230592  | -0.745906 |
| C | 2.425818  | 4.391382  | -0.894521 |
| C | 2.071319  | 5.365834  | -1.855440 |
| C | 0.972808  | 5.221872  | -2.678621 |
| C | 0.168212  | 4.057149  | -2.568672 |
| C | 0.523165  | 3.068963  | -1.608451 |
| N | -0.205786 | 1.930073  | -1.454979 |
| C | -1.288931 | 1.724542  | -2.192808 |
| C | -1.716742 | 2.651873  | -3.163367 |
| C | -0.987164 | 3.809396  | -3.351895 |
| N | 1.850161  | 2.179240  | 0.132735  |
| H | 2.688498  | 6.255678  | -1.937597 |
| H | 0.711070  | 5.984228  | -3.405710 |
| H | -1.290940 | 4.541473  | -4.094847 |
| H | -2.607050 | 2.444530  | -3.746348 |
| H | -1.825011 | 0.800306  | -2.001016 |
| C | 2.893375  | 2.072452  | 1.033853  |
| C | 2.819578  | 0.782806  | 1.801978  |
| C | 3.963395  | 0.160331  | 2.340338  |
| C | 1.541980  | 0.184214  | 1.892676  |
| C | 3.786785  | -1.095895 | 2.946768  |
| C | 1.411254  | -1.062780 | 2.518083  |
| C | 2.536050  | -1.708882 | 3.035070  |
| H | 0.363383  | 0.994242  | 2.181258  |
| H | 4.657967  | -1.605110 | 3.351500  |
| H | 0.432085  | -1.529345 | 2.590421  |
| H | 2.444855  | -2.687087 | 3.499145  |
| O | 3.793716  | 2.905310  | 1.188281  |
| H | 3.289712  | 4.535124  | -0.262385 |
| C | 5.347033  | 0.762233  | 2.267340  |
| H | 5.604731  | 1.045321  | 1.242665  |
| H | 5.408387  | 1.680079  | 2.858286  |
| H | 6.094910  | 0.054803  | 2.636423  |
| C | -1.631681 | -2.648654 | 0.311880  |
| C | -1.654860 | -3.380116 | 1.488329  |
| C | -2.890203 | -3.724523 | 2.087010  |
| C | -4.092318 | -3.349874 | 1.528972  |
| C | -4.103249 | -2.598051 | 0.324298  |
| C | -2.867955 | -2.241351 | -0.295732 |
| N | -2.806218 | -1.531538 | -1.457502 |
| C | -3.940315 | -1.160130 | -2.024862 |
| C | -5.217630 | -1.455296 | -1.490703 |
| C | -5.294408 | -2.172667 | -0.318606 |
| N | -0.476461 | -2.250233 | -0.361278 |
| H | -2.876344 | -4.297562 | 3.009044  |
| H | -5.035403 | -3.617530 | 1.995689  |
| H | -6.254565 | -2.419372 | 0.125844  |
| H | -6.109281 | -1.114914 | -2.005825 |
| H | -3.858345 | -0.593574 | -2.950589 |
| C | 0.802959  | -2.750895 | -0.241016 |
| C | 1.778132  | -2.069459 | -1.155361 |
| C | 2.732836  | -2.834419 | -1.865156 |
| C | 1.728401  | -0.672315 | -1.291727 |
| C | 3.598796  | -2.156233 | -2.731748 |
| C | 2.612794  | -0.022138 | -2.158438 |
| C | 3.541032  | -0.769698 | -2.886644 |
| H | 4.329175  | -2.728152 | -3.297930 |
| H | 2.589482  | 1.058455  | -2.262257 |
| H | 4.225265  | -0.272352 | -3.569360 |

|    |           |           |           |
|----|-----------|-----------|-----------|
| O  | 1.106218  | -3.653821 | 0.536017  |
| H  | -0.723519 | -3.700031 | 1.932962  |
| C  | 2.829379  | -4.336198 | -1.725944 |
| H  | 3.516334  | -4.748694 | -2.469556 |
| H  | 3.182226  | -4.611904 | -0.728697 |
| H  | 1.853930  | -4.816398 | -1.851271 |
| Co | 0.674002  | 0.593602  | -0.056964 |
| C  | -1.560467 | 1.053981  | 1.743230  |
| O  | -0.648802 | 1.460909  | 2.562134  |
| O  | -1.284301 | 0.491826  | 0.653099  |
| C  | -3.016268 | 1.229222  | 2.172599  |
| C  | -3.929302 | 1.236133  | 0.937564  |
| H  | -4.972311 | 1.345017  | 1.250968  |
| H  | -3.681133 | 2.068992  | 0.271436  |
| H  | -3.831245 | 0.311358  | 0.370834  |
| C  | -3.340538 | 0.012870  | 3.072738  |
| H  | -2.698581 | 0.001401  | 3.958918  |
| H  | -4.383247 | 0.068372  | 3.402188  |
| H  | -3.202092 | -0.925929 | 2.531165  |
| C  | -3.181258 | 2.534868  | 2.970744  |
| H  | -4.220179 | 2.631660  | 3.301854  |
| H  | -2.533801 | 2.547281  | 3.850172  |
| H  | -2.938533 | 3.406898  | 2.354310  |
| H  | -0.678086 | -1.664981 | -1.166226 |

**TS3-s**

Energy = -2172.48231398 ZPE = -2171.82498 H = -

2171.782658 G = -2171.89701

Imaginary frequency: -1021.73

|   |           |           |           |
|---|-----------|-----------|-----------|
| C | 0.832488  | 2.764544  | -0.508315 |
| C | 0.990069  | 4.133911  | -0.297971 |
| C | 0.429488  | 5.061276  | -1.206537 |
| C | -0.259993 | 4.663007  | -2.333495 |
| C | -0.430277 | 3.277752  | -2.590716 |
| C | 0.090935  | 2.341467  | -1.654963 |
| N | -0.058718 | 0.989916  | -1.824913 |
| C | -0.617978 | 0.535072  | -2.935486 |
| C | -1.139339 | 1.391347  | -3.926937 |
| C | -1.068826 | 2.754631  | -3.743443 |
| N | 1.326985  | 1.710988  | 0.238517  |
| H | 0.564073  | 6.120846  | -1.008382 |
| H | -0.664018 | 5.387408  | -3.033565 |
| H | -1.479992 | 3.437907  | -4.480826 |
| H | -1.594929 | 0.959066  | -4.810313 |
| H | -0.676695 | -0.537394 | -3.064937 |
| C | 2.222202  | 1.819031  | 1.260248  |
| C | 2.584889  | 0.464152  | 1.780509  |
| C | 3.831147  | 0.203697  | 2.379831  |
| C | 1.624873  | -0.557210 | 1.555639  |
| C | 4.109956  | -1.123305 | 2.740113  |
| C | 1.958856  | -1.868515 | 1.939468  |
| C | 3.190397  | -2.151179 | 2.523793  |
| H | 0.430469  | -0.189270 | 1.964012  |
| H | 5.070445  | -1.353125 | 3.194399  |
| H | 1.267394  | -2.685629 | 1.775016  |
| H | 3.437999  | -3.168710 | 2.812696  |
| O | 2.703286  | 2.879749  | 1.690286  |
| H | 1.554493  | 4.472361  | 0.558154  |
| C | 4.873016  | 1.272158  | 2.614329  |
| H | 5.079796  | 1.832825  | 1.698632  |
| H | 4.525926  | 2.006487  | 3.345651  |
| H | 5.804748  | 0.826854  | 2.974227  |
| C | -1.600857 | -2.069505 | 0.242181  |
| C | -1.558633 | -2.577360 | 1.519351  |

|    |           |           |           |    |           |           |           |
|----|-----------|-----------|-----------|----|-----------|-----------|-----------|
| C  | -2.758362 | -2.800572 | 2.238122  | H  | -0.504665 | 6.223197  | -0.524333 |
| C  | -3.985821 | -2.502738 | 1.689332  | H  | -1.521123 | 5.329798  | -2.599179 |
| C  | -4.061482 | -1.975224 | 0.373978  | H  | -1.820257 | 3.338972  | -4.185031 |
| C  | -2.857876 | -1.773529 | -0.364117 | H  | -1.304276 | 0.945012  | -4.689078 |
| N  | -2.845058 | -1.287127 | -1.634534 | H  | 0.107754  | -0.356565 | -3.083645 |
| C  | -3.995391 | -0.962182 | -2.194176 | C  | 2.328430  | 2.341483  | 1.419004  |
| C  | -5.245474 | -1.103480 | -1.543499 | C  | 3.005050  | 1.054756  | 1.816061  |
| C  | -5.276087 | -1.617575 | -0.266434 | C  | 4.281378  | 1.024203  | 2.401956  |
| N  | -0.442471 | -1.732143 | -0.542039 | C  | 2.294625  | -0.143764 | 1.520782  |
| H  | -2.695054 | -3.200314 | 3.244840  | C  | 4.834065  | -0.239936 | 2.671917  |
| H  | -4.901260 | -2.660983 | 2.251430  | C  | 2.889826  | -1.385649 | 1.814391  |
| H  | -6.215751 | -1.749139 | 0.262418  | C  | 4.155747  | -1.429417 | 2.392045  |
| H  | -6.155098 | -0.812947 | -2.057483 | H  | 1.056589  | -0.098159 | 1.923492  |
| H  | -3.949409 | -0.568153 | -3.207323 | H  | 5.824811  | -0.288680 | 3.116784  |
| C  | 0.584515  | -2.769115 | -0.787941 | H  | 2.347147  | -2.302912 | 1.608631  |
| C  | 1.784378  | -2.161515 | -1.378121 | H  | 4.620779  | -2.382428 | 2.627026  |
| C  | 2.756192  | -2.926206 | -2.072954 | O  | 2.559078  | 3.436362  | 1.942197  |
| C  | 1.946877  | -0.779656 | -1.141126 | H  | 0.924979  | 4.792883  | 0.921718  |
| C  | 3.879226  | -2.247701 | -2.549285 | C  | 5.069001  | 2.270996  | 2.728278  |
| C  | 3.089562  | -0.140225 | -1.621846 | H  | 5.132575  | 2.938817  | 1.864856  |
| C  | 4.044706  | -0.874279 | -2.327093 | H  | 4.581467  | 2.844974  | 3.520798  |
| H  | 4.637730  | -2.798163 | -3.098932 | H  | 6.081447  | 2.013401  | 3.050410  |
| H  | 3.233697  | 0.920268  | -1.442236 | C  | -2.044029 | -2.486636 | 0.104285  |
| H  | 4.933133  | -0.377474 | -2.709752 | C  | -2.308641 | -3.240057 | 1.235666  |
| O  | 0.387330  | -3.927021 | -0.481416 | C  | -3.618598 | -3.276903 | 1.771403  |
| H  | -0.613680 | -2.790174 | 1.996452  | C  | -4.654462 | -2.571739 | 1.199544  |
| C  | 2.606744  | -4.410203 | -2.299432 | C  | -4.413211 | -1.783916 | 0.042724  |
| H  | 3.395004  | -4.781189 | -2.959552 | C  | -3.102204 | -1.741486 | -0.519239 |
| H  | 2.656117  | -4.956527 | -1.352665 | N  | -2.798291 | -1.010514 | -1.627435 |
| H  | 1.635650  | -4.654014 | -2.741560 | C  | -3.756272 | -0.296825 | -2.188294 |
| Co | 0.519840  | 0.039025  | -0.171170 | C  | -5.088017 | -0.260195 | -1.707815 |
| C  | -1.387402 | 0.817174  | 1.850570  | C  | -5.413621 | -1.008918 | -0.599537 |
| O  | -0.586083 | 0.275811  | 2.682835  | N  | -0.802129 | -2.373681 | -0.521412 |
| O  | -1.210521 | 0.777995  | 0.602421  | H  | -3.797247 | -3.876195 | 2.659017  |
| C  | -2.579778 | 1.608406  | 2.400393  | H  | -5.654243 | -2.601799 | 1.622236  |
| C  | -3.653129 | 1.785131  | 1.315112  | H  | -6.424339 | -1.010398 | -0.200985 |
| H  | -4.486229 | 2.374256  | 1.712546  | H  | -5.827550 | 0.349946  | -2.215169 |
| H  | -3.247295 | 2.299675  | 0.441092  | H  | -3.475862 | 0.289434  | -3.060976 |
| H  | -4.043115 | 0.817527  | 0.986554  | C  | 0.389874  | -2.958774 | -0.203776 |
| C  | -3.169603 | 0.892860  | 3.627845  | C  | 1.518454  | -2.543884 | -1.108674 |
| H  | -2.412981 | 0.757835  | 4.404182  | C  | 2.231752  | -3.542059 | -1.811624 |
| H  | -3.993716 | 1.483402  | 4.041532  | C  | 1.868462  | -1.191057 | -1.222337 |
| H  | -3.556744 | -0.093716 | 3.353784  | C  | 3.287921  | -3.143084 | -2.637123 |
| C  | -2.007660 | 2.987382  | 2.807724  | C  | 2.930672  | -0.822452 | -2.057441 |
| H  | -2.809727 | 3.621403  | 3.200012  | C  | 3.638771  | -1.797310 | -2.762554 |
| H  | -1.242010 | 2.878792  | 3.581626  | H  | 3.838083  | -3.897275 | -3.193416 |
| H  | -1.558140 | 3.493572  | 1.946477  | H  | 3.208306  | 0.223845  | -2.162178 |
| H  | -0.843067 | -1.481301 | -1.456750 | H  | 4.460378  | -1.509053 | -3.412988 |
|    |           |           |           | O  | 0.540829  | -3.757259 | 0.725346  |
|    |           |           |           | H  | -1.508296 | -3.799220 | 1.698349  |
|    |           |           |           | C  | 1.864057  | -5.003241 | -1.691908 |
|    |           |           |           | H  | 2.469242  | -5.614120 | -2.366345 |
|    |           |           |           | H  | 2.008360  | -5.357881 | -0.668005 |
|    |           |           |           | H  | 0.808793  | -5.169917 | -1.935893 |
|    |           |           |           | Co | 1.171007  | 0.309411  | -0.181141 |
|    |           |           |           | C  | -0.957754 | 0.513033  | 1.719293  |
|    |           |           |           | O  | -0.100473 | 0.122433  | 2.581105  |
|    |           |           |           | O  | -0.796653 | 0.376770  | 0.471969  |
|    |           |           |           | C  | -2.200744 | 1.246172  | 2.239785  |
|    |           |           |           | C  | -3.104669 | 1.674262  | 1.075909  |
|    |           |           |           | H  | -3.975254 | 2.213208  | 1.464633  |
|    |           |           |           | H  | -2.567945 | 2.331268  | 0.385826  |
|    |           |           |           | H  | -3.458209 | 0.812024  | 0.509817  |
|    |           |           |           | C  | -2.959247 | 0.317371  | 3.207567  |

**TS3-t**  
Energy = -2172.46397432 ZPE = -2171.808285 H =  
-2171.764933 G = -2171.883822  
Imaginary frequency: -1016.96

|   |           |          |           |
|---|-----------|----------|-----------|
| C | 0.711119  | 3.054339 | -0.301527 |
| C | 0.478491  | 4.385297 | 0.025590  |
| C | -0.333164 | 5.189787 | -0.810514 |
| C | -0.903222 | 4.700078 | -1.966984 |
| C | -0.678814 | 3.348109 | -2.341935 |
| C | 0.121694  | 2.532973 | -1.497573 |
| N | 0.368925  | 1.215510 | -1.792586 |
| C | -0.129363 | 0.683935 | -2.898212 |
| C | -0.922732 | 1.427554 | -3.796668 |
| C | -1.202861 | 2.747488 | -3.515214 |
| N | 1.455095  | 2.109861 | 0.390917  |



|   |           |           |           |
|---|-----------|-----------|-----------|
| H | -2.311022 | 0.001956  | 4.029509  |
| H | -3.822898 | 0.843718  | 3.627790  |
| H | -3.322079 | -0.576534 | 2.691720  |
| C | -1.691570 | 2.496910  | 2.992449  |
| H | -2.542271 | 3.061455  | 3.388648  |
| H | -1.040133 | 2.214109  | 3.822833  |
| H | -1.128921 | 3.155126  | 2.320819  |
| H | -0.818792 | -1.711164 | -1.290260 |

**TS4b-q**

Energy = -2172.43054465 ZPE = -2171.77207 H = -  
2171.728261 G = -2171.848975

Imaginary frequency: -277.91

|   |           |           |           |
|---|-----------|-----------|-----------|
| C | -3.133758 | -0.820289 | -0.876259 |
| C | -3.973392 | -1.817397 | -0.400131 |
| C | -5.206545 | -1.486663 | 0.206679  |
| C | -5.612614 | -0.178953 | 0.350408  |
| C | -4.774028 | 0.867519  | -0.113453 |
| C | -3.525426 | 0.557085  | -0.737205 |
| N | -2.679000 | 1.521957  | -1.198871 |
| C | -3.029125 | 2.786618  | -1.043330 |
| C | -4.238451 | 3.200617  | -0.436725 |
| C | -5.109609 | 2.239511  | 0.020357  |
| N | -1.898111 | -1.042876 | -1.490240 |
| H | -5.838925 | -2.293478 | 0.564475  |
| H | -6.559890 | 0.068369  | 0.819823  |
| H | -6.050564 | 2.511943  | 0.490094  |
| H | -4.459676 | 4.258202  | -0.343034 |
| H | -2.331065 | 3.536355  | -1.408394 |
| C | -1.222099 | -2.231258 | -1.668161 |
| C | 0.161291  | -2.105749 | -2.227374 |
| C | 0.546439  | -2.982639 | -3.262446 |
| C | 1.079283  | -1.174184 | -1.628073 |
| C | 1.843232  | -2.871020 | -3.784561 |
| C | 2.384446  | -1.110053 | -2.223534 |
| C | 2.751714  | -1.927373 | -3.277162 |
| H | 2.140461  | -3.519422 | -4.604387 |
| H | 3.107518  | -0.409162 | -1.813527 |
| H | 3.744424  | -1.846982 | -3.713391 |
| O | -1.716353 | -3.322444 | -1.365558 |
| H | -3.673828 | -2.849220 | -0.503773 |
| C | -0.396781 | -4.005254 | -3.857504 |
| H | -0.560705 | -4.833795 | -3.162943 |
| H | -1.382601 | -3.578003 | -4.064973 |
| H | 0.007427  | -4.406402 | -4.790927 |
| C | 3.009626  | 2.102626  | 0.108126  |
| C | 4.204424  | 2.669827  | 0.551563  |
| C | 4.599864  | 3.961632  | 0.134113  |
| C | 3.838741  | 4.714543  | -0.733497 |
| C | 2.618459  | 4.181473  | -1.223269 |
| C | 2.200357  | 2.886834  | -0.792810 |
| N | 1.028296  | 2.340878  | -1.244201 |
| C | 0.280735  | 2.996073  | -2.122973 |
| C | 0.624101  | 4.275345  | -2.601211 |
| C | 1.783234  | 4.865397  | -2.142134 |
| N | 2.486165  | 0.856897  | 0.438860  |
| H | 5.537405  | 4.360598  | 0.511086  |
| H | 4.156687  | 5.701185  | -1.055901 |
| H | 2.075690  | 5.853762  | -2.485680 |
| H | -0.022292 | 4.773510  | -3.314865 |
| H | -0.618303 | 2.484036  | -2.449968 |
| C | 3.172211  | -0.111939 | 1.097495  |
| C | 2.372107  | -1.382897 | 1.331799  |
| C | 2.423543  | -1.992886 | 2.613108  |

|    |           |           |           |
|----|-----------|-----------|-----------|
| C  | 1.633015  | -2.009764 | 0.317102  |
| C  | 1.778784  | -3.222266 | 2.801595  |
| C  | 1.030221  | -3.252506 | 0.502364  |
| C  | 1.111795  | -3.864688 | 1.758731  |
| H  | 1.806156  | -3.683919 | 3.784868  |
| H  | 0.485564  | -3.732809 | -0.303236 |
| H  | 0.638306  | -4.828714 | 1.925470  |
| O  | 4.343957  | -0.050882 | 1.501925  |
| H  | 4.832079  | 2.098311  | 1.219485  |
| C  | 3.136443  | -1.346001 | 3.779679  |
| H  | 2.873388  | -0.287488 | 3.870701  |
| H  | 2.875641  | -1.847807 | 4.715440  |
| H  | 4.219802  | -1.385500 | 3.644278  |
| Co | 0.745135  | 0.443124  | -0.440269 |
| H  | -1.471866 | -0.197353 | -1.851085 |
| C  | -1.956744 | 0.400534  | 3.086934  |
| C  | -0.979939 | 0.301710  | 4.288144  |
| H  | -0.071420 | 0.885043  | 4.106884  |
| H  | -1.471071 | 0.698472  | 5.181670  |
| H  | -0.694966 | -0.736627 | 4.478418  |
| C  | -3.220450 | -0.436334 | 3.364248  |
| H  | -3.734151 | -0.026558 | 4.239005  |
| H  | -3.909669 | -0.405100 | 2.516326  |
| H  | -2.970627 | -1.479884 | 3.567901  |
| C  | -2.325320 | 1.866948  | 2.818431  |
| H  | -1.434962 | 2.471285  | 2.628669  |
| H  | -2.988011 | 1.955483  | 1.953934  |
| H  | -2.843140 | 2.275161  | 3.691208  |
| C  | -1.193098 | -0.162140 | 1.900373  |
| O  | -1.100395 | -1.479117 | 1.889278  |
| O  | -0.655497 | 0.561273  | 1.055329  |
| H  | -0.470682 | -1.793185 | 1.203947  |

**TS4b-s**

Energy = -2172.46616405 ZPE = -2171.80471 H = -  
2171.76223 G = -2171.878204

Imaginary frequency: -145.70

|   |           |           |           |
|---|-----------|-----------|-----------|
| C | -2.401913 | -0.775799 | -0.588844 |
| C | -2.671359 | -1.834228 | 0.249202  |
| C | -3.825246 | -1.822334 | 1.069288  |
| C | -4.696897 | -0.755515 | 1.058128  |
| C | -4.448166 | 0.349325  | 0.202554  |
| C | -3.297995 | 0.333003  | -0.642721 |
| N | -3.002557 | 1.345849  | -1.502913 |
| C | -3.801202 | 2.396236  | -1.534044 |
| C | -4.956035 | 2.522685  | -0.723444 |
| C | -5.280555 | 1.496661  | 0.135274  |
| N | -1.207548 | -0.674727 | -1.384180 |
| H | -4.009460 | -2.668489 | 1.723444  |
| H | -5.574146 | -0.744346 | 1.698040  |
| H | -6.162754 | 1.552530  | 0.766705  |
| H | -5.567629 | 3.415507  | -0.793694 |
| H | -3.534018 | 3.190436  | -2.228176 |
| C | -0.921515 | -1.791257 | -2.342434 |
| C | 0.502097  | -1.942857 | -2.546023 |
| C | 1.008510  | -2.519397 | -3.746606 |
| C | 1.387494  | -1.465544 | -1.485800 |
| C | 2.380632  | -2.521713 | -3.956001 |
| C | 2.789896  | -1.459422 | -1.805130 |
| C | 3.255707  | -1.964862 | -2.996401 |
| H | 2.782701  | -2.934188 | -4.876591 |
| H | 3.493770  | -1.080034 | -1.074134 |
| H | 4.323747  | -1.946630 | -3.200298 |
| O | -1.857402 | -2.392204 | -2.852839 |

|    |           |           |           |    |           |           |           |
|----|-----------|-----------|-----------|----|-----------|-----------|-----------|
| H  | -1.989174 | -2.672339 | 0.299878  | C  | -5.545691 | -0.493088 | 0.447289  |
| C  | 0.093485  | -3.073288 | -4.812734 | C  | -4.866394 | 0.581262  | -0.184525 |
| H  | -0.481505 | -3.924948 | -4.438324 | C  | -3.598314 | 0.350311  | -0.799521 |
| H  | -0.644192 | -2.330866 | -5.133596 | N  | -2.893108 | 1.337942  | -1.417302 |
| H  | 0.671273  | -3.391579 | -5.684549 | C  | -3.405115 | 2.555385  | -1.439772 |
| C  | 2.575728  | 1.661153  | 0.243327  | C  | -4.653102 | 2.890914  | -0.863079 |
| C  | 3.687388  | 2.282886  | 0.811375  | C  | -5.380078 | 1.902548  | -0.239715 |
| C  | 4.056521  | 3.586306  | 0.409456  | N  | -1.766826 | -1.096147 | -1.362854 |
| C  | 3.350425  | 4.283427  | -0.549393 | H  | -5.482381 | -2.569024 | 0.951707  |
| C  | 2.216272  | 3.682990  | -1.155801 | H  | -6.510759 | -0.311969 | 0.910643  |
| C  | 1.829503  | 2.374207  | -0.748975 | H  | -6.341363 | 2.117880  | 0.218155  |
| N  | 0.741528  | 1.729569  | -1.287659 | H  | -5.014789 | 3.911874  | -0.916658 |
| C  | 0.041486  | 2.351060  | -2.228411 | H  | -2.811094 | 3.324573  | -1.929198 |
| C  | 0.355709  | 3.645232  | -2.694179 | C  | -1.123639 | -2.252668 | -1.732015 |
| C  | 1.434952  | 4.310825  | -2.158579 | C  | 0.295373  | -2.078438 | -2.201621 |
| N  | 2.074288  | 0.400444  | 0.503854  | C  | 0.607943  | -2.540990 | -3.499590 |
| H  | 4.926077  | 4.043551  | 0.873273  | C  | 1.300909  | -1.519548 | -1.362758 |
| H  | 3.647045  | 5.282938  | -0.852102 | C  | 1.922820  | -2.429036 | -3.960022 |
| H  | 1.699426  | 5.309687  | -2.493803 | C  | 2.620820  | -1.452237 | -1.861142 |
| H  | -0.262832 | 4.093445  | -3.463729 | C  | 2.920841  | -1.888751 | -3.145222 |
| H  | -0.824694 | 1.836705  | -2.624329 | H  | 2.166042  | -2.769896 | -4.962161 |
| C  | 2.662460  | -0.538709 | 1.278744  | H  | 3.409483  | -1.053700 | -1.235141 |
| C  | 1.875594  | -1.824655 | 1.229295  | H  | 3.940869  | -1.814987 | -3.511965 |
| C  | 1.870918  | -2.698431 | 2.339370  | O  | -1.652172 | -3.363613 | -1.662366 |
| C  | 1.090175  | -2.105121 | 0.060258  | H  | -3.292408 | -2.985960 | -0.121249 |
| C  | 1.105297  | -3.871299 | 2.267841  | C  | -0.456759 | -3.125575 | -4.401369 |
| C  | 0.376791  | -3.322690 | 0.034760  | H  | -0.819714 | -4.079102 | -4.008845 |
| C  | 0.374699  | -4.186373 | 1.123594  | H  | -1.326349 | -2.463843 | -4.478162 |
| H  | 1.092966  | -4.546480 | 3.118582  | H  | -0.064346 | -3.286982 | -5.408191 |
| H  | -0.148505 | -3.616272 | -0.865973 | C  | 3.013855  | 1.835597  | 0.304381  |
| H  | -0.188074 | -5.114003 | 1.075123  | C  | 4.199534  | 2.455767  | 0.701334  |
| O  | 3.708723  | -0.419908 | 1.938307  | C  | 4.517115  | 3.762457  | 0.268496  |
| H  | 4.259858  | 1.751748  | 1.557890  | C  | 3.683608  | 4.476360  | -0.566836 |
| C  | 2.612731  | -2.392229 | 3.620753  | C  | 2.474552  | 3.883300  | -1.014877 |
| H  | 2.394008  | -1.380284 | 3.972127  | C  | 2.138483  | 2.565836  | -0.580341 |
| H  | 2.329940  | -3.103433 | 4.401369  | N  | 0.989013  | 1.944674  | -1.002485 |
| H  | 3.693397  | -2.436210 | 3.470192  | C  | 0.173684  | 2.580013  | -1.835094 |
| Co | 0.506470  | -0.112766 | -0.437138 | C  | 0.427012  | 3.884033  | -2.307395 |
| H  | -1.380835 | 0.143738  | -1.979646 | C  | 1.571138  | 4.531352  | -1.894957 |
| C  | -1.719894 | 1.461926  | 3.336246  | N  | 2.549249  | 0.588362  | 0.673320  |
| C  | -0.636459 | 1.934260  | 4.336195  | H  | 5.447473  | 4.209307  | 0.608391  |
| H  | 0.148689  | 2.501936  | 3.826053  | H  | 3.937502  | 5.479218  | -0.896428 |
| H  | -1.095676 | 2.584621  | 5.087236  | H  | 1.797773  | 5.536402  | -2.240272 |
| H  | -0.175443 | 1.085141  | 4.847998  | H  | -0.276865 | 4.353900  | -2.985520 |
| C  | -2.808474 | 0.659885  | 4.077646  | H  | -0.722262 | 2.043326  | -2.127755 |
| H  | -3.305997 | 1.311663  | 4.802325  | C  | 3.315416  | -0.409251 | 1.178790  |
| H  | -3.560788 | 0.282320  | 3.379164  | C  | 2.490764  | -1.662732 | 1.374709  |
| H  | -2.380199 | -0.190079 | 4.613889  | C  | 2.806872  | -2.560822 | 2.417633  |
| C  | -2.339020 | 2.666716  | 2.611985  | C  | 1.331847  | -1.869393 | 0.564662  |
| H  | -1.576679 | 3.242365  | 2.081275  | C  | 1.952725  | -3.648642 | 2.658662  |
| H  | -3.088294 | 2.345051  | 1.883391  | C  | 0.507161  | -2.973108 | 0.843373  |
| H  | -2.825632 | 3.320912  | 3.341544  | C  | 0.812100  | -3.848326 | 1.889728  |
| C  | -1.016362 | 0.574439  | 2.318067  | H  | 2.184692  | -4.334577 | 3.468343  |
| O  | -0.661428 | -0.620782 | 2.800412  | H  | -0.364375 | -3.182840 | 0.241471  |
| O  | -0.761213 | 0.924886  | 1.172124  | H  | 0.154721  | -4.689106 | 2.091850  |
| H  | -0.157591 | -1.100811 | 2.114925  | O  | 4.529980  | -0.365637 | 1.445717  |
|    |           |           |           | H  | 4.874868  | 1.913472  | 1.348123  |
|    |           |           |           | C  | 4.005647  | -2.377450 | 3.321987  |
|    |           |           |           | H  | 4.050958  | -1.364077 | 3.728946  |
|    |           |           |           | H  | 3.967555  | -3.090299 | 4.150328  |
|    |           |           |           | H  | 4.938225  | -2.521968 | 2.771617  |
|    |           |           |           | Co | 0.850995  | -0.005805 | -0.220552 |
|    |           |           |           | H  | -1.402130 | -0.210602 | -1.698075 |
|    |           |           |           | C  | -2.021223 | 1.078656  | 3.062898  |

**TS4b-t**  
Energy = -2172.4718655 ZPE = -2171.812256 H = -  
2171.768619 G = -2171.889695  
Imaginary frequency: -289.45

|   |           |           |           |
|---|-----------|-----------|-----------|
| C | -3.028733 | -0.966484 | -0.766730 |
| C | -3.714181 | -1.991710 | -0.136502 |
| C | -4.970353 | -1.744051 | 0.466201  |

|   |           |           |          |   |           |           |           |
|---|-----------|-----------|----------|---|-----------|-----------|-----------|
| C | -1.188844 | 1.451927  | 4.312687 | H | 5.840171  | 3.671495  | 0.248193  |
| H | -0.277587 | 1.990749  | 4.032403 | H | 4.849483  | 4.793150  | -1.731281 |
| H | -1.784436 | 2.102706  | 4.960085 | H | 2.975567  | 4.899060  | -3.423798 |
| H | -0.905900 | 0.561854  | 4.880061 | H | 0.827175  | 3.948140  | -4.281525 |
| C | -3.287059 | 0.301197  | 3.484391 | H | -0.210290 | 2.016014  | -3.052400 |
| H | -3.908468 | 0.941699  | 4.117846 | C | 2.905838  | -0.394969 | 1.136965  |
| H | -3.878679 | 0.005628  | 2.613233 | C | 1.913128  | -1.448298 | 1.587154  |
| H | -3.028637 | -0.597966 | 4.048908 | C | 1.845516  | -1.779318 | 2.964350  |
| C | -2.401077 | 2.342576  | 2.279498 | C | 1.056978  | -2.089469 | 0.689895  |
| H | -1.511434 | 2.894581  | 1.964692 | C | 0.928715  | -2.754606 | 3.370931  |
| H | -2.977275 | 2.094190  | 1.386784 | C | 0.169919  | -3.080545 | 1.092631  |
| H | -3.009518 | 2.994657  | 2.913076 | C | 0.105646  | -3.408874 | 2.449075  |
| C | -1.155316 | 0.181565  | 2.190411 | H | 0.859852  | -3.005910 | 4.426053  |
| O | -0.832494 | -0.973507 | 2.756548 | H | -0.475482 | -3.580584 | 0.378735  |
| O | -0.766822 | 0.503756  | 1.066781 | H | -0.588470 | -4.173119 | 2.790310  |
| H | -0.278530 | -1.496741 | 2.135389 | O | 4.115834  | -0.541727 | 1.331153  |

**TS4-q**

Energy = -2172.43586925 ZPE = -2171.777628 H =  
-2171.733982 G = -2171.853748

Imaginary frequency: -281.02

|   |           |           |           |
|---|-----------|-----------|-----------|
| C | -3.242805 | -0.530284 | -1.135360 |
| C | -4.313248 | -1.297694 | -0.701928 |
| C | -5.435301 | -0.685409 | -0.096858 |
| C | -5.503791 | 0.677946  | 0.079863  |
| C | -4.428618 | 1.494542  | -0.357269 |
| C | -3.289163 | 0.897684  | -0.980338 |
| N | -2.223399 | 1.632125  | -1.409363 |
| C | -2.245892 | 2.939571  | -1.219584 |
| C | -3.320954 | 3.627034  | -0.609353 |
| C | -4.411998 | 2.902906  | -0.187155 |
| N | -2.076990 | -1.047167 | -1.705958 |
| H | -6.253566 | -1.317358 | 0.234998  |
| H | -6.363992 | 1.142206  | 0.552653  |
| H | -5.260898 | 3.390364  | 0.284244  |
| H | -3.271552 | 4.703453  | -0.486049 |
| H | -1.376403 | 3.496941  | -1.559265 |
| C | -1.576518 | -2.327771 | -1.610138 |
| C | -0.132349 | -2.477371 | -1.977411 |
| C | 0.246594  | -3.578249 | -2.773321 |
| C | 0.832912  | -1.554239 | -1.437097 |
| C | 1.596838  | -3.714901 | -3.128411 |
| C | 2.189918  | -1.745328 | -1.865861 |
| C | 2.560205  | -2.791703 | -2.691554 |
| H | 1.893768  | -4.541369 | -3.768538 |
| H | 2.954653  | -1.056312 | -1.513432 |
| H | 3.595434  | -2.904406 | -3.004392 |
| O | -2.271255 | -3.278517 | -1.235837 |
| H | -4.271580 | -2.370238 | -0.820159 |
| C | -0.748382 | -4.591163 | -3.297171 |
| H | -1.091058 | -5.251207 | -2.495380 |
| H | -1.643934 | -4.111003 | -3.702327 |
| H | -0.297297 | -5.201841 | -4.084135 |
| C | 3.043073  | 1.740712  | -0.018907 |
| C | 4.255411  | 2.224170  | 0.457216  |
| C | 4.895324  | 3.324584  | -0.159475 |
| C | 4.349753  | 3.954551  | -1.256471 |
| C | 3.116525  | 3.492553  | -1.784016 |
| C | 2.457887  | 2.392570  | -1.156332 |
| N | 1.267130  | 1.913691  | -1.639072 |
| C | 0.727436  | 2.453261  | -2.724719 |
| C | 1.313787  | 3.539106  | -3.403558 |
| C | 2.498561  | 4.059108  | -2.926772 |
| N | 2.298176  | 0.682330  | 0.533105  |

|    |           |           |           |
|----|-----------|-----------|-----------|
| H  | 5.840171  | 3.671495  | 0.248193  |
| H  | 4.849483  | 4.793150  | -1.731281 |
| H  | 2.975567  | 4.899060  | -3.423798 |
| H  | 0.827175  | 3.948140  | -4.281525 |
| H  | -0.210290 | 2.016014  | -3.052400 |
| C  | 2.905838  | -0.394969 | 1.136965  |
| C  | 1.913128  | -1.448298 | 1.587154  |
| C  | 1.845516  | -1.779318 | 2.964350  |
| C  | 1.056978  | -2.089469 | 0.689895  |
| C  | 0.928715  | -2.754606 | 3.370931  |
| C  | 0.169919  | -3.080545 | 1.092631  |
| C  | 0.105646  | -3.408874 | 2.449075  |
| H  | 0.859852  | -3.005910 | 4.426053  |
| H  | -0.475482 | -3.580584 | 0.378735  |
| H  | -0.588470 | -4.173119 | 2.790310  |
| O  | 4.115834  | -0.541727 | 1.331153  |
| H  | 4.714863  | 1.738035  | 1.306464  |
| C  | 2.696960  | -1.057660 | 3.983570  |
| H  | 3.759568  | -1.149907 | 3.748437  |
| H  | 2.458785  | 0.012653  | 3.990350  |
| H  | 2.518551  | -1.447768 | 4.988870  |
| Co | 0.607600  | 0.256768  | -0.549879 |
| H  | -1.459543 | -0.336065 | -2.075493 |
| C  | -1.762621 | 0.679468  | 3.129154  |
| C  | -2.760630 | -0.415411 | 2.716642  |
| H  | -2.268277 | -1.391799 | 2.668758  |
| H  | -3.565661 | -0.469434 | 3.455738  |
| H  | -3.198805 | -0.207552 | 1.740054  |
| C  | -2.460036 | 2.062786  | 3.136885  |
| H  | -3.277246 | 2.048644  | 3.864629  |
| H  | -1.760972 | 2.855755  | 3.419299  |
| H  | -2.878281 | 2.297054  | 2.153722  |
| C  | -1.168641 | 0.371269  | 4.516356  |
| H  | -0.637112 | -0.585334 | 4.507300  |
| H  | -0.471059 | 1.148821  | 4.835261  |
| H  | -1.978534 | 0.310075  | 5.249626  |
| C  | -0.658206 | 0.765153  | 2.087454  |
| O  | -0.839241 | 0.394379  | 0.916953  |
| O  | 0.474800  | 1.295101  | 2.500964  |
| H  | 1.172297  | 1.214565  | 1.776098  |

**TS4-s**

Energy = -2172.46801024 ZPE = -2171.806529 H =  
-2171.764175 G = -2171.878924

Imaginary frequency: -188.58

|   |           |           |           |
|---|-----------|-----------|-----------|
| C | -2.548257 | -0.734133 | -0.348784 |
| C | -2.899641 | -1.695513 | 0.570072  |
| C | -4.117430 | -1.596050 | 1.282476  |
| C | -4.971824 | -0.533140 | 1.085843  |
| C | -4.636947 | 0.475369  | 0.146048  |
| C | -3.417426 | 0.367795  | -0.591513 |
| N | -3.040137 | 1.292891  | -1.518804 |
| C | -3.827454 | 2.332505  | -1.728731 |
| C | -5.047685 | 2.539909  | -1.041452 |
| C | -5.449126 | 1.610271  | -0.109132 |
| N | -1.293995 | -0.761286 | -1.058281 |
| H | -4.367547 | -2.369042 | 2.002340  |
| H | -5.900439 | -0.451109 | 1.642758  |
| H | -6.379380 | 1.731660  | 0.438724  |
| H | -5.644190 | 3.419469  | -1.257341 |
| H | -3.491883 | 3.054001  | -2.470840 |
| C | -1.119003 | -1.894602 | -2.024896 |
| C | 0.283891  | -2.179126 | -2.236278 |
| C | 0.726378  | -2.768825 | -3.454567 |

|    |           |           |           |
|----|-----------|-----------|-----------|
| C  | 1.206075  | -1.820190 | -1.167282 |
| C  | 2.091395  | -2.907727 | -3.667670 |
| C  | 2.599855  | -1.963026 | -1.483896 |
| C  | 3.014921  | -2.478656 | -2.691014 |
| H  | 2.449925  | -3.330877 | -4.601255 |
| H  | 3.345352  | -1.692845 | -0.746174 |
| H  | 4.079990  | -2.568466 | -2.891246 |
| O  | -2.106110 | -2.403158 | -2.536231 |
| H  | -2.225555 | -2.518635 | 0.768402  |
| C  | -0.240430 | -3.192594 | -4.534678 |
| H  | -0.893363 | -3.998683 | -4.188401 |
| H  | -0.903995 | -2.371612 | -4.824394 |
| H  | 0.302207  | -3.532480 | -5.420774 |
| C  | 2.876013  | 0.989301  | 0.381335  |
| C  | 4.185353  | 1.335636  | 0.698613  |
| C  | 4.762887  | 2.505131  | 0.151397  |
| C  | 4.055438  | 3.344905  | -0.682634 |
| C  | 2.715596  | 3.025902  | -1.025791 |
| C  | 2.139717  | 1.831379  | -0.508256 |
| N  | 0.859840  | 1.436919  | -0.820410 |
| C  | 0.123533  | 2.234446  | -1.586549 |
| C  | 0.606917  | 3.447596  | -2.121328 |
| C  | 1.900077  | 3.836524  | -1.855430 |
| N  | 2.127549  | -0.090020 | 0.854391  |
| H  | 5.788639  | 2.747214  | 0.414015  |
| H  | 4.502907  | 4.250548  | -1.080326 |
| H  | 2.303952  | 4.758213  | -2.264440 |
| H  | -0.051005 | 4.049573  | -2.738164 |
| H  | -0.897613 | 1.925399  | -1.781753 |
| C  | 2.651808  | -1.159950 | 1.527288  |
| C  | 1.679430  | -2.302854 | 1.526017  |
| C  | 1.615664  | -3.195698 | 2.613118  |
| C  | 0.821785  | -2.440800 | 0.389548  |
| C  | 0.694065  | -4.250210 | 2.555772  |
| C  | -0.045696 | -3.552030 | 0.365202  |
| C  | -0.121348 | -4.432048 | 1.439062  |
| H  | 0.630269  | -4.944087 | 3.389305  |
| H  | -0.640877 | -3.753558 | -0.517508 |
| H  | -0.805955 | -5.274450 | 1.397542  |
| O  | 3.774423  | -1.229218 | 2.044035  |
| H  | 4.746451  | 0.707694  | 1.375293  |
| C  | 2.483930  | -3.041552 | 3.841329  |
| H  | 3.523942  | -3.293732 | 3.618382  |
| H  | 2.490225  | -2.009876 | 4.203137  |
| H  | 2.127983  | -3.692253 | 4.644592  |
| Co | 0.461277  | -0.420521 | -0.057902 |
| H  | -1.332185 | 0.059678  | -1.673155 |
| C  | -1.454688 | 2.584763  | 2.698451  |
| C  | -2.746923 | 1.915260  | 3.204177  |
| H  | -2.558092 | 1.332790  | 4.112155  |
| H  | -3.490024 | 2.683137  | 3.441029  |
| H  | -3.161453 | 1.247817  | 2.446802  |
| C  | -1.759320 | 3.404791  | 1.419884  |
| H  | -2.472348 | 4.200137  | 1.658408  |
| H  | -0.851340 | 3.866785  | 1.018388  |
| H  | -2.192399 | 2.768028  | 0.645519  |
| C  | -0.851380 | 3.491598  | 3.780981  |
| H  | -0.596254 | 2.921597  | 4.679405  |
| H  | 0.054448  | 3.988799  | 3.425152  |
| H  | -1.579849 | 4.259767  | 4.058603  |
| C  | -0.487608 | 1.491084  | 2.258739  |
| O  | -0.848909 | 0.543846  | 1.562122  |
| O  | 0.779575  | 1.657948  | 2.621646  |
| H  | 1.303978  | 0.944473  | 2.172551  |

**TS4-t**

Energy = -2172.48187301 ZPE = -2171.822243 H =

-2171.779017 G = -2171.897295

Imaginary frequency: -281.52

|   |           |           |           |
|---|-----------|-----------|-----------|
| C | -3.199634 | -0.708271 | -0.903535 |
| C | -4.132320 | -1.549504 | -0.319067 |
| C | -5.323754 | -1.018039 | 0.230004  |
| C | -5.593202 | 0.331358  | 0.200235  |
| C | -4.662857 | 1.218798  | -0.401317 |
| C | -3.457468 | 0.702791  | -0.965806 |
| N | -2.525059 | 1.499429  | -1.557742 |
| C | -2.745106 | 2.801169  | -1.594782 |
| C | -3.903193 | 3.415630  | -1.061627 |
| C | -4.860340 | 2.621965  | -0.471945 |
| N | -1.965829 | -1.112184 | -1.425876 |
| H | -6.032066 | -1.702545 | 0.686534  |
| H | -6.507348 | 0.731538  | 0.628295  |
| H | -5.764557 | 3.052459  | -0.051001 |
| H | -4.019949 | 4.491982  | -1.125190 |
| H | -1.977035 | 3.412215  | -2.064651 |
| C | -1.446324 | -2.377085 | -1.518024 |
| C | 0.007872  | -2.445048 | -1.899591 |
| C | 0.337656  | -3.183630 | -3.058082 |
| C | 1.021133  | -1.839997 | -1.106504 |
| C | 1.680907  | -3.297269 | -3.429136 |
| C | 2.366019  | -2.013838 | -1.498771 |
| C | 2.686884  | -2.716070 | -2.654997 |
| H | 1.939498  | -3.851413 | -4.326739 |
| H | 3.164633  | -1.602633 | -0.893061 |
| H | 3.728005  | -2.822772 | -2.946426 |
| O | -2.103186 | -3.394619 | -1.290091 |
| H | -3.942127 | -2.612047 | -0.287187 |
| C | -0.734199 | -3.826696 | -3.910150 |
| H | -1.217107 | -4.647735 | -3.373782 |
| H | -1.523107 | -3.112971 | -4.170453 |
| H | -0.308649 | -4.215465 | -4.838354 |
| C | 3.139474  | 1.548189  | 0.166890  |
| C | 4.376268  | 2.048162  | 0.556113  |
| C | 4.944922  | 3.166718  | -0.095793 |
| C | 4.301004  | 3.798875  | -1.137746 |
| C | 3.043373  | 3.313196  | -1.581528 |
| C | 2.462193  | 2.184436  | -0.929302 |
| N | 1.261157  | 1.659140  | -1.342483 |
| C | 0.627299  | 2.214574  | -2.367895 |
| C | 1.124969  | 3.338893  | -3.058089 |
| C | 2.326978  | 3.884701  | -2.663488 |
| N | 2.444174  | 0.490297  | 0.760282  |
| H | 5.910899  | 3.531160  | 0.241626  |
| H | 4.742217  | 4.657978  | -1.633767 |
| H | 2.741427  | 4.748356  | -3.176007 |
| H | 0.559246  | 3.751077  | -3.886118 |
| H | -0.316511 | 1.757162  | -2.645059 |
| C | 3.071289  | -0.608823 | 1.301101  |
| C | 2.041369  | -1.641403 | 1.678833  |
| C | 2.158663  | -2.347651 | 2.894525  |
| C | 0.877150  | -1.762173 | 0.872826  |
| C | 1.077823  | -3.133109 | 3.316674  |
| C | -0.187804 | -2.542213 | 1.338137  |
| C | -0.089879 | -3.209719 | 2.558662  |
| H | 1.147518  | -3.670371 | 4.258523  |
| H | -1.097736 | -2.642942 | 0.765664  |
| H | -0.928347 | -3.804289 | 2.911375  |
| O | 4.288767  | -0.763944 | 1.461045  |

|    |           |           |           |   |           |           |           |
|----|-----------|-----------|-----------|---|-----------|-----------|-----------|
| H  | 4.902099  | 1.563241  | 1.367400  | C | 1.792262  | -3.142012 | -3.747035 |
| C  | 3.384648  | -2.236002 | 3.772911  | C | 2.643035  | -3.436413 | -2.702488 |
| H  | 4.263936  | -2.655026 | 3.277342  | C | 2.417981  | -2.826575 | -1.441668 |
| H  | 3.627894  | -1.191469 | 3.990474  | C | 1.326823  | -1.919325 | -1.291135 |
| H  | 3.227218  | -2.760953 | 4.718977  | N | 1.087920  | -1.292305 | -0.108247 |
| Co | 0.766419  | -0.082410 | -0.304739 | C | 1.853018  | -1.535077 | 0.941919  |
| H  | -1.430384 | -0.335320 | -1.797496 | C | 2.937829  | -2.436178 | 0.892410  |
| C  | -1.778759 | 1.249899  | 3.041219  | C | 3.219844  | -3.072169 | -0.296848 |
| C  | -2.724772 | 0.035605  | 2.930901  | N | -0.616140 | -0.781841 | -2.061372 |
| H  | -2.221148 | -0.882950 | 3.250300  | H | 1.958052  | -3.601343 | -4.718382 |
| H  | -3.597531 | 0.192528  | 3.572176  | H | 3.476093  | -4.122439 | -2.824142 |
| H  | -3.064615 | -0.103205 | 1.903711  | H | 4.054995  | -3.763255 | -0.374669 |
| C  | -2.493611 | 2.519698  | 2.524313  | H | 3.535741  | -2.604628 | 1.781277  |
| H  | -3.388562 | 2.707040  | 3.126191  | H | 1.624765  | -0.973503 | 1.839163  |
| H  | -1.842849 | 3.397474  | 2.598559  | C | -1.617373 | -0.458788 | -2.935101 |
| H  | -2.796825 | 2.397501  | 1.482896  | C | -2.657671 | 0.426691  | -2.300441 |
| C  | -1.322045 | 1.444785  | 4.494260  | C | -3.803140 | 0.905578  | -2.982618 |
| H  | -0.792971 | 0.561308  | 4.863594  | C | -2.452567 | 0.774727  | -0.966079 |
| H  | -0.655164 | 2.305192  | 4.591999  | C | -4.691843 | 1.721702  | -2.264779 |
| H  | -2.196722 | 1.612190  | 5.130576  | C | -3.333024 | 1.589806  | -0.264571 |
| C  | -0.600052 | 1.000327  | 2.106457  | C | -4.471533 | 2.061844  | -0.927841 |
| O  | -0.789425 | 0.634120  | 0.937714  | H | -5.577038 | 2.100423  | -2.770385 |
| O  | 0.598393  | 1.207899  | 2.607243  | H | -3.132453 | 1.871043  | 0.765445  |
| H  | 1.309311  | 0.990658  | 1.909607  | H | -5.182676 | 2.700708  | -0.408443 |

#### TS5-q

Energy = -2171.95127091 ZPE = -2171.311927 H =

-2171.268002 G = -2171.390933

Imaginary frequency: -1326.36

|   |           |           |           |
|---|-----------|-----------|-----------|
| C | -0.901186 | -0.493376 | 2.800595  |
| C | -0.761256 | -0.447604 | 4.189377  |
| C | -1.102237 | -1.562239 | 4.990395  |
| C | -1.583072 | -2.737466 | 4.451822  |
| C | -1.741819 | -2.838162 | 3.045078  |
| C | -1.401128 | -1.719958 | 2.229135  |
| N | -1.524309 | -1.769973 | 0.873950  |
| C | -1.965061 | -2.866178 | 0.281250  |
| C | -2.331092 | -4.018468 | 1.009191  |
| C | -2.217368 | -3.999903 | 2.383628  |
| N | -0.624881 | 0.500804  | 1.875072  |
| H | -0.974488 | -1.479857 | 6.066471  |
| H | -1.836255 | -3.585844 | 5.080466  |
| H | -2.486132 | -4.871474 | 2.974446  |
| H | -2.689565 | -4.896402 | 0.483059  |
| H | -2.018359 | -2.829001 | -0.803161 |
| C | -0.332078 | 1.801225  | 2.205878  |
| C | -0.301810 | 2.685542  | 0.986863  |
| C | -0.846476 | 3.986559  | 1.029503  |
| C | 0.180023  | 2.117688  | -0.214861 |
| C | -0.922230 | 4.701365  | -0.175721 |
| C | 0.080942  | 2.879140  | -1.394397 |
| C | -0.467662 | 4.159498  | -1.381205 |
| H | 1.379702  | 1.420013  | -0.264930 |
| H | -1.355715 | 5.698977  | -0.167183 |
| H | 0.448852  | 2.458532  | -2.328090 |
| H | -0.545731 | 4.739694  | -2.297790 |
| O | -0.184029 | 2.246469  | 3.354019  |
| H | -0.390518 | 0.458948  | 4.644123  |
| C | -1.383302 | 4.615329  | 2.295907  |
| H | -2.110217 | 3.962160  | 2.789004  |
| H | -0.585978 | 4.781053  | 3.024797  |
| H | -1.867605 | 5.571847  | 2.077226  |
| C | 0.424078  | -1.636620 | -2.380774 |
| C | 0.695203  | -2.262734 | -3.603372 |

|    |           |           |           |
|----|-----------|-----------|-----------|
| C  | 1.792262  | -3.142012 | -3.747035 |
| C  | 2.643035  | -3.436413 | -2.702488 |
| C  | 2.417981  | -2.826575 | -1.441668 |
| C  | 1.326823  | -1.919325 | -1.291135 |
| N  | 1.087920  | -1.292305 | -0.108247 |
| C  | 1.853018  | -1.535077 | 0.941919  |
| C  | 2.937829  | -2.436178 | 0.892410  |
| C  | 3.219844  | -3.072169 | -0.296848 |
| N  | -0.616140 | -0.781841 | -2.061372 |
| H  | 1.958052  | -3.601343 | -4.718382 |
| H  | 3.476093  | -4.122439 | -2.824142 |
| H  | 4.054995  | -3.763255 | -0.374669 |
| H  | 3.535741  | -2.604628 | 1.781277  |
| H  | 1.624765  | -0.973503 | 1.839163  |
| C  | -1.617373 | -0.458788 | -2.935101 |
| C  | -2.657671 | 0.426691  | -2.300441 |
| C  | -3.803140 | 0.905578  | -2.982618 |
| C  | -2.452567 | 0.774727  | -0.966079 |
| C  | -4.691843 | 1.721702  | -2.264779 |
| C  | -3.333024 | 1.589806  | -0.264571 |
| C  | -4.471533 | 2.061844  | -0.927841 |
| H  | -5.577038 | 2.100423  | -2.770385 |
| H  | -3.132453 | 1.871043  | 0.765445  |
| H  | -5.182676 | 2.700708  | -0.408443 |
| O  | -1.710740 | -0.834087 | -4.118832 |
| H  | 0.043068  | -2.067634 | -4.440926 |
| C  | -4.108574 | 0.585995  | -4.428233 |
| H  | -5.040926 | 1.069138  | -4.737166 |
| H  | -3.301775 | 0.916761  | -5.087750 |
| H  | -4.197190 | -0.491918 | -4.588346 |
| Co | -0.677499 | 0.005658  | -0.081434 |
| C  | 3.332396  | 1.164407  | 0.523394  |
| O  | 2.571789  | 1.191363  | -0.530661 |
| O  | 2.932349  | 1.262718  | 1.690641  |
| C  | 4.847667  | 1.054419  | 0.216917  |
| C  | 5.561429  | 0.366457  | 1.390599  |
| H  | 6.644250  | 0.347992  | 1.222043  |
| H  | 5.357963  | 0.890690  | 2.326973  |
| H  | 5.215967  | -0.666603 | 1.502476  |
| C  | 5.100830  | 0.276493  | -1.085049 |
| H  | 4.609278  | 0.760210  | -1.931963 |
| H  | 6.176835  | 0.222547  | -1.289331 |
| H  | 4.714805  | -0.744905 | -1.012249 |
| C  | 5.363957  | 2.503017  | 0.067576  |
| H  | 6.439732  | 2.506323  | -0.143039 |
| H  | 4.852698  | 3.015591  | -0.754064 |
| H  | 5.193001  | 3.073460  | 0.986687  |

#### TS5-s

Energy = -2172.01663612 ZPE = -2171.372967 H =

-2171.330784 G = -2171.445776

Imaginary frequency: -866.90

|   |           |          |           |
|---|-----------|----------|-----------|
| C | 1.170468  | 2.789104 | -0.792564 |
| C | 1.519611  | 4.135012 | -0.925879 |
| C | 0.972966  | 4.910537 | -1.973123 |
| C | 0.086967  | 4.390374 | -2.897122 |
| C | -0.295306 | 3.027198 | -2.801213 |
| C | 0.248608  | 2.242684 | -1.746701 |
| N | -0.075782 | 0.922265 | -1.595445 |
| C | -0.906671 | 0.338124 | -2.443987 |
| C | -1.485606 | 1.043283 | -3.520365 |
| C | -1.185541 | 2.377243 | -3.695372 |
| N | 1.602263  | 1.861822 | 0.130934  |
| H | 1.266112  | 5.954443 | -2.046170 |



|    |           |           |           |   |           |           |           |
|----|-----------|-----------|-----------|---|-----------|-----------|-----------|
| C  | -3.956032 | -2.512945 | 2.295271  | H | -1.326632 | 0.074617  | 4.831575  |
| C  | -3.200564 | -1.419385 | 0.263545  | H | -2.890370 | 0.709156  | 5.391321  |
| C  | -4.171756 | -2.138142 | 0.965872  | C | -1.154819 | 2.027430  | -1.790317 |
| H  | -4.719989 | -3.077502 | 2.824499  | C | -1.423097 | 2.941763  | -2.809898 |
| H  | -3.365278 | -1.141150 | -0.771189 | C | -0.876228 | 4.244502  | -2.759135 |
| H  | -5.102437 | -2.413597 | 0.474509  | C | -0.074010 | 4.668029  | -1.716448 |
| O  | -0.158732 | -1.165903 | 4.008834  | C | 0.208202  | 3.777770  | -0.646419 |
| H  | 1.722624  | 0.028404  | 4.208091  | C | -0.336391 | 2.464227  | -0.692832 |
| C  | -2.591972 | -2.581736 | 4.409299  | N | -0.137394 | 1.555064  | 0.313216  |
| H  | -3.460482 | -3.147625 | 4.759949  | C | 0.591410  | 1.902221  | 1.364949  |
| H  | -1.695024 | -3.194299 | 4.536971  | C | 1.184183  | 3.178474  | 1.487411  |
| H  | -2.450777 | -1.712064 | 5.057427  | C | 0.994921  | 4.111173  | 0.489083  |
| Co | -0.542487 | -0.069992 | 0.138175  | N | -1.581900 | 0.719594  | -1.666820 |
| C  | 3.246264  | -1.200875 | -0.742614 | H | -1.096662 | 4.929588  | -3.573905 |
| O  | 2.312807  | -0.927684 | -1.597760 | H | 0.340025  | 5.672000  | -1.698006 |
| O  | 3.063625  | -1.633767 | 0.405963  | H | 1.434025  | 5.102560  | 0.560690  |
| C  | 4.699666  | -1.006588 | -1.255247 | H | 1.774101  | 3.409656  | 2.368410  |
| C  | 5.229282  | -2.414269 | -1.604495 | H | 0.701200  | 1.142307  | 2.133275  |
| H  | 6.270504  | -2.360972 | -1.943916 | C | -2.688311 | 0.206215  | -2.256097 |
| H  | 5.183568  | -3.069904 | -0.729469 | C | -3.053559 | -1.123105 | -1.638125 |
| H  | 4.634486  | -2.869178 | -2.404671 | C | -3.590819 | -2.152168 | -2.439826 |
| C  | 4.755575  | -0.104467 | -2.496436 | C | -2.776908 | -1.342473 | -0.242107 |
| H  | 4.360671  | 0.890699  | -2.271289 | C | -3.866757 | -3.396762 | -1.859030 |
| H  | 5.791485  | 0.005034  | -2.839535 | C | -3.072376 | -2.625495 | 0.284933  |
| H  | 4.161107  | -0.521433 | -3.312987 | C | -3.603796 | -3.630113 | -0.507261 |
| C  | 5.551004  | -0.401782 | -0.125261 | H | -4.276367 | -4.191659 | -2.476472 |
| H  | 6.600557  | -0.326658 | -0.433073 | H | -2.909647 | -2.807467 | 1.341749  |
| H  | 5.198103  | 0.601381  | 0.135195  | H | -3.821679 | -4.602174 | -0.072203 |
| H  | 5.488357  | -1.020966 | 0.772294  | O | -3.371154 | 0.738024  | -3.153958 |

#### TS6-s

Energy = -2172.00709942 ZPE = -2171.360924 H =

-2171.318292 G = -2171.435176

Imaginary frequency: -77.71

|   |           |           |           |
|---|-----------|-----------|-----------|
| C | 0.905990  | -1.976494 | 1.146285  |
| C | 1.596165  | -2.782742 | 2.056724  |
| C | 2.822738  | -3.380910 | 1.689941  |
| C | 3.390326  | -3.199849 | 0.442444  |
| C | 2.719082  | -2.396663 | -0.517258 |
| C | 1.477560  | -1.804766 | -0.161101 |
| N | 0.738026  | -1.060906 | -1.047980 |
| C | 1.221593  | -0.846204 | -2.266612 |
| C | 2.460038  | -1.370061 | -2.694363 |
| C | 3.200263  | -2.151179 | -1.831825 |
| N | -0.274904 | -1.287796 | 1.317470  |
| H | 3.334453  | -3.999620 | 2.423050  |
| H | 4.338240  | -3.661697 | 0.182155  |
| H | 4.146677  | -2.585093 | -2.142798 |
| H | 2.801868  | -1.167507 | -3.703995 |
| H | 0.592018  | -0.259272 | -2.925818 |
| C | -1.095375 | -1.351118 | 2.403852  |
| C | -2.274606 | -0.453233 | 2.199688  |
| C | -2.840941 | 0.242800  | 3.287045  |
| C | -2.687044 | -0.176861 | 0.831766  |
| C | -3.795187 | 1.238664  | 3.043762  |
| C | -3.661326 | 0.856998  | 0.656782  |
| C | -4.184547 | 1.548979  | 1.730468  |
| H | -4.225063 | 1.783210  | 3.880253  |
| H | -4.017362 | 1.081516  | -0.343103 |
| H | -4.919579 | 2.332149  | 1.557510  |
| O | -0.906636 | -2.038090 | 3.432135  |
| H | 1.175949  | -2.933137 | 3.041164  |
| C | -2.411562 | -0.008216 | 4.717625  |
| H | -2.667147 | -1.021072 | 5.038896  |

|    |           |           |           |
|----|-----------|-----------|-----------|
| H  | -1.326632 | 0.074617  | 4.831575  |
| H  | -2.890370 | 0.709156  | 5.391321  |
| C  | -1.154819 | 2.027430  | -1.790317 |
| C  | -1.423097 | 2.941763  | -2.809898 |
| C  | -0.876228 | 4.244502  | -2.759135 |
| C  | -0.074010 | 4.668029  | -1.716448 |
| C  | 0.208202  | 3.777770  | -0.646419 |
| C  | -0.336391 | 2.464227  | -0.692832 |
| N  | -0.137394 | 1.555064  | 0.313216  |
| C  | 0.591410  | 1.902221  | 1.364949  |
| C  | 1.184183  | 3.178474  | 1.487411  |
| C  | 0.994921  | 4.111173  | 0.489083  |
| N  | -1.581900 | 0.719594  | -1.666820 |
| H  | -1.096662 | 4.929588  | -3.573905 |
| H  | 0.340025  | 5.672000  | -1.698006 |
| H  | 1.434025  | 5.102560  | 0.560690  |
| H  | 1.774101  | 3.409656  | 2.368410  |
| H  | 0.701200  | 1.142307  | 2.133275  |
| C  | -2.688311 | 0.206215  | -2.256097 |
| C  | -3.053559 | -1.123105 | -1.638125 |
| C  | -3.590819 | -2.152168 | -2.439826 |
| C  | -2.776908 | -1.342473 | -0.242107 |
| C  | -3.866757 | -3.396762 | -1.859030 |
| C  | -3.072376 | -2.625495 | 0.284933  |
| C  | -3.603796 | -3.630113 | -0.507261 |
| H  | -4.276367 | -4.191659 | -2.476472 |
| H  | -2.909647 | -2.807467 | 1.341749  |
| H  | -3.821679 | -4.602174 | -0.072203 |
| O  | -3.371154 | 0.738024  | -3.153958 |
| H  | -2.054586 | 2.636960  | -3.632778 |
| C  | -3.823148 | -1.977100 | -3.923841 |
| H  | -4.594284 | -1.230249 | -4.123150 |
| H  | -2.909981 | -1.633568 | -4.415931 |
| H  | -4.118014 | -2.928623 | -4.376360 |
| Co | -0.884556 | -0.248546 | -0.165148 |
| C  | 0.003981  | -5.154360 | -3.290763 |
| C  | 0.102655  | -5.279115 | -4.816951 |
| H  | 0.813032  | -4.554566 | -5.224696 |
| H  | 0.438888  | -6.285440 | -5.086413 |
| H  | -0.867152 | -5.098861 | -5.289680 |
| C  | -1.021109 | -6.166279 | -2.734854 |
| H  | -0.718664 | -7.184030 | -3.002815 |
| H  | -1.090016 | -6.097648 | -1.646649 |
| H  | -2.017677 | -5.984455 | -3.151255 |
| C  | 1.386500  | -5.393216 | -2.643567 |
| H  | 2.122042  | -4.671503 | -3.013191 |
| H  | 1.335174  | -5.294134 | -1.556615 |
| H  | 1.739234  | -6.400647 | -2.888328 |
| C  | -0.456612 | -3.741246 | -2.928838 |
| O  | -0.662740 | -2.846016 | -3.729668 |
| O  | -0.600524 | -3.590439 | -1.604380 |
| H  | -0.869860 | -2.669307 | -1.408951 |

#### TS6-s-AQBr

Energy = -2197.1281906 ZPE = -2196.502813 H = -

2196.456967 G = -2196.583711

Imaginary frequency: -104.27

|   |          |           |           |
|---|----------|-----------|-----------|
| C | 0.890785 | -1.980233 | 1.245733  |
| C | 1.553499 | -2.791824 | 2.170831  |
| C | 2.759216 | -3.428097 | 1.812546  |
| C | 3.335803 | -3.283310 | 0.563886  |
| C | 2.695553 | -2.476422 | -0.410330 |
| C | 1.465152 | -1.839716 | -0.065060 |
| N | 0.737730 | -1.086279 | -0.951928 |





|    |           |           |           |   |           |           |           |
|----|-----------|-----------|-----------|---|-----------|-----------|-----------|
| C  | -3.593679 | -2.215870 | -2.367198 | O | -0.918789 | -2.027836 | 3.432126  |
| C  | -2.716860 | -1.380411 | -0.199163 | H | 1.143642  | -2.941695 | 3.046774  |
| C  | -3.845721 | -3.456450 | -1.766512 | C | -2.398980 | 0.026397  | 4.710512  |
| C  | -2.984650 | -2.665357 | 0.345635  | H | -2.656551 | -0.983869 | 5.038046  |
| C  | -3.532111 | -3.678567 | -0.422659 | H | -1.313301 | 0.106304  | 4.820747  |
| H  | -4.272885 | -4.258248 | -2.362526 | H | -2.872894 | 0.749176  | 5.381945  |
| H  | -2.788693 | -2.841196 | 1.397808  | C | -1.148884 | 2.037623  | -1.789253 |
| H  | -3.725677 | -4.649831 | 0.025534  | C | -1.416898 | 2.946097  | -2.813783 |
| O  | -3.319318 | 0.644501  | -3.159237 | C | -0.879740 | 4.250030  | -2.758106 |
| H  | -2.016983 | 2.510717  | -3.665312 | C | -0.089857 | 4.680298  | -1.707272 |
| C  | -3.878201 | -2.057785 | -3.844056 | C | 0.192228  | 3.798175  | -0.629444 |
| H  | -4.648104 | -1.305267 | -4.025711 | C | -0.343037 | 2.480837  | -0.684276 |
| H  | -2.980353 | -1.729648 | -4.373148 | N | -0.151806 | 1.565484  | 0.318452  |
| H  | -4.200935 | -3.011908 | -4.271715 | C | 0.561143  | 1.918575  | 1.376857  |
| Co | -0.876489 | -0.267132 | -0.106793 | C | 1.141788  | 3.197080  | 1.505922  |
| C  | 0.018472  | -5.044614 | -3.438682 | C | 0.973159  | 4.151646  | 0.519109  |
| C  | 0.059628  | -5.072995 | -4.972402 | N | -1.570028 | 0.726859  | -1.670261 |
| H  | 0.743514  | -4.313103 | -5.360316 | H | -1.095415 | 4.934701  | -3.574590 |
| H  | 0.398302  | -6.055042 | -5.317448 | H | 0.309593  | 5.688367  | -1.702152 |
| H  | -0.930267 | -4.878892 | -5.395551 | H | 1.719006  | 3.425017  | 2.397204  |
| C  | -0.971091 | -6.104139 | -2.907958 | H | 0.668851  | 1.161168  | 2.148153  |
| H  | -0.669608 | -7.098107 | -3.254400 | C | -2.678429 | 0.214547  | -2.256136 |
| H  | -0.994408 | -6.107434 | -1.815742 | C | -3.044149 | -1.115200 | -1.637202 |
| H  | -1.986384 | -5.908512 | -3.269298 | C | -3.570299 | -2.147634 | -2.442142 |
| C  | 1.428499  | -5.301013 | -2.861008 | C | -2.784913 | -1.329847 | -0.237862 |
| H  | 2.144946  | -4.559598 | -3.228113 | C | -3.847132 | -3.392099 | -1.861611 |
| H  | 1.423150  | -5.254138 | -1.769181 | C | -3.080916 | -2.611983 | 0.289302  |
| H  | 1.777312  | -6.293100 | -3.166465 | C | -3.598022 | -3.621472 | -0.506662 |
| C  | -0.446292 | -3.663710 | -2.974777 | H | -4.246908 | -4.189982 | -2.481723 |
| O  | -0.674961 | -2.719102 | -3.709976 | H | -2.929915 | -2.789481 | 1.348676  |
| O  | -0.566296 | -3.599823 | -1.639775 | H | -3.816805 | -4.593425 | -0.071784 |
| H  | -0.859590 | -2.701306 | -1.384523 | O | -3.365198 | 0.745358  | -3.151625 |
| Cl | 4.646906  | -2.997640 | -2.283174 | H | -2.039372 | 2.634669  | -3.641014 |
| Cl | 1.749309  | 5.690548  | 0.548892  | C | -3.792630 | -1.974198 | -3.927875 |

**TS6-s-AQMe**

Energy = -2250.65636309 ZPE = -2249.954276 H =  
-2249.908506 G = -2250.031356

Imaginary frequency: -69.14

|   |           |           |           |
|---|-----------|-----------|-----------|
| C | 0.896664  | -1.985488 | 1.147925  |
| C | 1.569592  | -2.800633 | 2.063503  |
| C | 2.783972  | -3.418488 | 1.698802  |
| C | 3.355855  | -3.250587 | 0.450186  |
| C | 2.704620  | -2.438908 | -0.517175 |
| C | 1.474072  | -1.824647 | -0.159399 |
| N | 0.740943  | -1.068356 | -1.041715 |
| C | 1.228489  | -0.864744 | -2.258648 |
| C | 2.454198  | -1.412261 | -2.685646 |
| C | 3.202338  | -2.212725 | -1.841828 |
| N | -0.275593 | -1.281599 | 1.317991  |
| H | 3.286415  | -4.044544 | 2.432215  |
| H | 4.294932  | -3.735618 | 0.208545  |
| H | 2.792068  | -1.215540 | -3.698704 |
| H | 0.610907  | -0.268321 | -2.921056 |
| C | -1.100052 | -1.339587 | 2.402817  |
| C | -2.273075 | -0.435946 | 2.195610  |
| C | -2.831323 | 0.271709  | 3.279709  |
| C | -2.684216 | -0.163073 | 0.825295  |
| C | -3.777238 | 1.274514  | 3.033346  |
| C | -3.651931 | 0.878659  | 0.647528  |
| C | -4.166595 | 1.580430  | 1.718238  |
| H | -4.200276 | 1.827933  | 3.867516  |
| H | -4.007847 | 1.101482  | -0.352835 |
| H | -4.895467 | 2.368845  | 1.542385  |

|    |           |           |           |
|----|-----------|-----------|-----------|
| O  | -0.918789 | -2.027836 | 3.432126  |
| H  | 1.143642  | -2.941695 | 3.046774  |
| C  | -2.398980 | 0.026397  | 4.710512  |
| H  | -2.656551 | -0.983869 | 5.038046  |
| H  | -1.313301 | 0.106304  | 4.820747  |
| H  | -2.872894 | 0.749176  | 5.381945  |
| C  | -1.148884 | 2.037623  | -1.789253 |
| C  | -1.416898 | 2.946097  | -2.813783 |
| C  | -0.879740 | 4.250030  | -2.758106 |
| C  | -0.089857 | 4.680298  | -1.707272 |
| C  | 0.192228  | 3.798175  | -0.629444 |
| C  | -0.343037 | 2.480837  | -0.684276 |
| N  | -0.151806 | 1.565484  | 0.318452  |
| C  | 0.561143  | 1.918575  | 1.376857  |
| C  | 1.141788  | 3.197080  | 1.505922  |
| C  | 0.973159  | 4.151646  | 0.519109  |
| N  | -1.570028 | 0.726859  | -1.670261 |
| H  | -1.095415 | 4.934701  | -3.574590 |
| H  | 0.309593  | 5.688367  | -1.702152 |
| H  | 1.719006  | 3.425017  | 2.397204  |
| H  | 0.668851  | 1.161168  | 2.148153  |
| C  | -2.678429 | 0.214547  | -2.256136 |
| C  | -3.044149 | -1.115200 | -1.637202 |
| C  | -3.570299 | -2.147634 | -2.442142 |
| C  | -2.784913 | -1.329847 | -0.237862 |
| C  | -3.847132 | -3.392099 | -1.861611 |
| C  | -3.080916 | -2.611983 | 0.289302  |
| C  | -3.598022 | -3.621472 | -0.506662 |
| H  | -4.246908 | -4.189982 | -2.481723 |
| H  | -2.929915 | -2.789481 | 1.348676  |
| H  | -3.816805 | -4.593425 | -0.071784 |
| O  | -3.365198 | 0.745358  | -3.151625 |
| H  | -2.039372 | 2.634669  | -3.641014 |
| C  | -3.792630 | -1.974198 | -3.927875 |
| H  | -4.572393 | -1.237462 | -4.131900 |
| H  | -2.880687 | -1.618442 | -4.413083 |
| H  | -4.071860 | -2.928940 | -4.383515 |
| Co | -0.877662 | -0.239901 | -0.165722 |
| C  | 0.019965  | -5.157153 | -3.300814 |
| C  | 0.060519  | -5.300237 | -4.828129 |
| H  | 0.737213  | -4.565532 | -5.272894 |
| H  | 0.408066  | -6.302534 | -5.098202 |
| H  | -0.931408 | -5.147946 | -5.263621 |
| C  | -0.959036 | -6.183051 | -2.691678 |
| H  | -0.646877 | -7.197307 | -2.961706 |
| H  | -0.984309 | -6.104006 | -1.602422 |
| H  | -1.975673 | -6.026458 | -3.068019 |
| C  | 1.433394  | -5.357725 | -2.708598 |
| H  | 2.138042  | -4.633735 | -3.129633 |
| H  | 1.428990  | -5.232119 | -1.623128 |
| H  | 1.793014  | -6.364712 | -2.944898 |
| C  | -0.448414 | -3.746397 | -2.938920 |
| O  | -0.655783 | -2.852171 | -3.740431 |
| O  | -0.591254 | -3.594665 | -1.614451 |
| H  | -0.855611 | -2.672008 | -1.419318 |
| C  | 4.492761  | -2.839805 | -2.296512 |
| H  | 5.331280  | -2.526920 | -1.663687 |
| H  | 4.438760  | -3.933055 | -2.235475 |
| H  | 4.722496  | -2.567139 | -3.329204 |
| C  | 1.579822  | 5.523705  | 0.644701  |
| H  | 2.256427  | 5.734648  | -0.191526 |
| H  | 0.805853  | 6.299906  | 0.630111  |
| H  | 2.144753  | 5.622909  | 1.574530  |

**TS6-s-AQNH2**Energy = -2282.74216601 ZPE = -2282.061572 H =  
-2282.016224 G = -2282.137638

Imaginary frequency: -14.52

|   |           |           |           |
|---|-----------|-----------|-----------|
| C | 0.920270  | -2.031835 | 0.981650  |
| C | 1.589502  | -2.871951 | 1.877880  |
| C | 2.797906  | -3.492236 | 1.500744  |
| C | 3.360424  | -3.312200 | 0.249939  |
| C | 2.703314  | -2.487032 | -0.700999 |
| C | 1.491892  | -1.850653 | -0.328104 |
| N | 0.763330  | -1.063579 | -1.186682 |
| C | 1.243982  | -0.860159 | -2.408424 |
| C | 2.435691  | -1.430168 | -2.872195 |
| C | 3.174810  | -2.272044 | -2.043636 |
| N | -0.244256 | -1.320992 | 1.176138  |
| H | 3.304362  | -4.126735 | 2.223879  |
| H | 4.307582  | -3.785801 | 0.013674  |
| H | 2.755495  | -1.244543 | -3.892996 |
| H | 0.634595  | -0.235979 | -3.054219 |
| C | -1.054492 | -1.389677 | 2.277542  |
| C | -2.200980 | -0.450394 | 2.126163  |
| C | -2.678915 | 0.275327  | 3.237944  |
| C | -2.644253 | -0.130990 | 0.767955  |
| C | -3.563573 | 1.341472  | 3.042122  |
| C | -3.550964 | 0.982448  | 0.643580  |
| C | -3.975138 | 1.696112  | 1.741521  |
| H | -3.920225 | 1.907875  | 3.898420  |
| H | -3.925698 | 1.247214  | -0.339812 |
| H | -4.655213 | 2.534930  | 1.604524  |
| O | -0.863929 | -2.113416 | 3.283153  |
| H | 1.164689  | -3.025865 | 2.859628  |
| C | -2.212192 | -0.019562 | 4.648835  |
| H | -2.507253 | -1.022511 | 4.967531  |
| H | -1.120521 | 0.004813  | 4.723571  |
| H | -2.626796 | 0.712079  | 5.349651  |
| C | -1.182273 | 2.148979  | -1.757793 |
| C | -1.485989 | 3.099876  | -2.730939 |
| C | -1.006007 | 4.420219  | -2.601044 |
| C | -0.248971 | 4.821742  | -1.515512 |
| C | 0.052346  | 3.894389  | -0.482283 |
| C | -0.405601 | 2.556938  | -0.619248 |
| N | -0.173427 | 1.586670  | 0.321703  |
| C | 0.509281  | 1.915648  | 1.409821  |
| C | 1.006226  | 3.206034  | 1.643002  |
| C | 0.785963  | 4.220304  | 0.712693  |
| N | -1.551412 | 0.815211  | -1.718363 |
| H | -1.235032 | 5.138543  | -3.383940 |
| H | 0.124317  | 5.839714  | -1.471154 |
| H | 1.546491  | 3.413092  | 2.561968  |
| H | 0.646771  | 1.119561  | 2.136174  |
| C | -2.685109 | 0.323453  | -2.265500 |
| C | -3.027282 | -1.033025 | -1.677076 |
| C | -3.491317 | -2.064774 | -2.522797 |
| C | -2.862839 | -1.258439 | -0.269767 |
| C | -3.795528 | -3.314293 | -1.971036 |
| C | -3.181476 | -2.541968 | 0.230345  |
| C | -3.639539 | -3.550900 | -0.604114 |
| H | -4.145705 | -4.110961 | -2.622239 |
| H | -3.092408 | -2.720306 | 1.296796  |
| H | -3.885396 | -4.525511 | -0.190329 |
| O | -3.425888 | 0.883240  | -3.097693 |
| H | -2.090036 | 2.807500  | -3.578859 |
| C | -3.615428 | -1.870784 | -4.017203 |
| H | -4.341241 | -1.092232 | -4.258519 |

|    |           |           |           |
|----|-----------|-----------|-----------|
| H  | -2.655333 | -1.564401 | -4.441358 |
| H  | -3.912575 | -2.805975 | -4.500528 |
| Co | -0.833152 | -0.204186 | -0.258306 |
| C  | 0.054005  | -5.288766 | -3.142478 |
| C  | 0.144649  | -5.511661 | -4.657808 |
| H  | 0.837143  | -4.800979 | -5.117126 |
| H  | 0.498731  | -6.526857 | -4.864108 |
| H  | -0.831726 | -5.381806 | -5.133828 |
| C  | -0.952189 | -6.276124 | -2.513768 |
| H  | -0.635594 | -7.304851 | -2.715389 |
| H  | -1.016819 | -6.136700 | -1.432221 |
| H  | -1.953529 | -6.138197 | -2.935643 |
| C  | 1.444675  | -5.468294 | -2.492485 |
| H  | 2.178561  | -4.792390 | -2.942579 |
| H  | 1.410186  | -5.261867 | -1.420148 |
| H  | 1.790726  | -6.496490 | -2.642444 |
| C  | -0.418798 | -3.858735 | -2.871149 |
| O  | -0.602708 | -3.010699 | -3.726453 |
| O  | -0.599672 | -3.634434 | -1.561877 |
| H  | -0.848242 | -2.696820 | -1.425194 |
| N  | 1.292974  | 5.490326  | 0.901470  |
| H  | 0.785995  | 6.251533  | 0.472533  |
| H  | 1.585855  | 5.708504  | 1.844170  |
| N  | 4.346231  | -2.856930 | -2.478042 |
| H  | 4.610729  | -3.729919 | -2.044655 |
| H  | 4.495340  | -2.859518 | -3.477748 |

**TS6-s-AQOH**Energy = -2322.46206838 ZPE = -2321.806446 H =  
-2321.761679 G = -2321.882268

Imaginary frequency: -39.10

|   |           |           |           |
|---|-----------|-----------|-----------|
| C | 0.878657  | -2.023726 | 1.075149  |
| C | 1.534789  | -2.875951 | 1.970434  |
| C | 2.725986  | -3.530733 | 1.590094  |
| C | 3.293679  | -3.366480 | 0.339656  |
| C | 2.653596  | -2.516468 | -0.597713 |
| C | 1.453437  | -1.856177 | -0.232691 |
| N | 0.744012  | -1.065030 | -1.103648 |
| C | 1.227498  | -0.876169 | -2.324321 |
| C | 2.421121  | -1.465350 | -2.778162 |
| C | 3.126755  | -2.297594 | -1.926859 |
| N | -0.276533 | -1.296442 | 1.262031  |
| H | 3.209623  | -4.184873 | 2.311384  |
| H | 4.209075  | -3.875829 | 0.062270  |
| H | 2.759032  | -1.288518 | -3.794739 |
| H | 0.629281  | -0.250313 | -2.977868 |
| C | -1.096767 | -1.355024 | 2.353523  |
| C | -2.253579 | -0.431610 | 2.167742  |
| C | -2.782316 | 0.282665  | 3.263161  |
| C | -2.669593 | -0.133342 | 0.798758  |
| C | -3.696372 | 1.318146  | 3.036884  |
| C | -3.606147 | 0.946859  | 0.643394  |
| C | -4.085125 | 1.652096  | 1.725780  |
| H | -4.094057 | 1.876514  | 3.880219  |
| H | -3.963220 | 1.193983  | -0.350975 |
| H | -4.788151 | 2.467217  | 1.565453  |
| O | -0.914201 | -2.060044 | 3.372670  |
| H | 1.108422  | -3.021297 | 2.952969  |
| C | -2.345223 | 0.008926  | 4.687574  |
| H | -2.623126 | -0.999292 | 5.004866  |
| H | -1.257023 | 0.062090  | 4.790619  |
| H | -2.797063 | 0.733812  | 5.372024  |
| C | -1.163904 | 2.099760  | -1.769615 |
| C | -1.446911 | 3.034247  | -2.766373 |

|                                                |           |           |           |    |           |           |           |
|------------------------------------------------|-----------|-----------|-----------|----|-----------|-----------|-----------|
| C                                              | -0.941887 | 4.349919  | -2.672207 | C  | 2.441013  | -1.265135 | -2.832625 |
| C                                              | -0.167823 | 4.766593  | -1.604878 | C  | 3.198253  | -2.041815 | -1.981633 |
| C                                              | 0.122193  | 3.850163  | -0.561912 | N  | -0.278232 | -1.284236 | 1.202023  |
| C                                              | -0.372768 | 2.522665  | -0.647906 | H  | 3.372818  | -3.970534 | 2.233663  |
| N                                              | -0.161604 | 1.585426  | 0.331246  | H  | 4.367122  | -3.572824 | -0.002180 |
| C                                              | 0.533072  | 1.932494  | 1.404037  | H  | 4.147292  | -2.460855 | -2.304618 |
| C                                              | 1.081331  | 3.217639  | 1.581157  | H  | 2.771134  | -1.049978 | -3.843290 |
| C                                              | 0.881391  | 4.177362  | 0.603056  | H  | 0.560469  | -0.166472 | -3.029675 |
| N                                              | -1.562326 | 0.777900  | -1.688832 | C  | -1.100982 | -1.414518 | 2.281690  |
| H                                              | -1.171447 | 5.052501  | -3.469193 | C  | -2.284937 | -0.506216 | 2.126066  |
| H                                              | 0.215209  | 5.778865  | -1.547879 | C  | -2.923135 | 0.082697  | 3.242488  |
| H                                              | 1.644758  | 3.445939  | 2.481142  | C  | -2.634115 | -0.136294 | 0.752511  |
| H                                              | 0.654101  | 1.160639  | 2.158692  | C  | -3.892422 | 1.057201  | 2.980480  |
| C                                              | -2.680655 | 0.276635  | -2.261141 | C  | -3.614256 | 0.901886  | 0.605176  |
| C                                              | -3.038940 | -1.065122 | -1.656228 | C  | -4.226087 | 1.487481  | 1.690269  |
| C                                              | -3.530875 | -2.098105 | -2.483268 | H  | -3.915059 | 1.216563  | -0.387681 |
| C                                              | -2.833351 | -1.283216 | -0.250840 | H  | -4.968342 | 2.265719  | 1.547715  |
| C                                              | -3.825431 | -3.344011 | -1.916355 | O  | -0.909223 | -2.188844 | 3.246332  |
| C                                              | -3.145030 | -2.564703 | 0.263287  | H  | 1.200845  | -2.954565 | 2.875967  |
| C                                              | -3.630025 | -3.574846 | -0.553282 | C  | -2.554359 | -0.241562 | 4.673882  |
| H                                              | -4.197665 | -4.142192 | -2.553118 | H  | -3.426619 | -0.639779 | 5.204675  |
| H                                              | -3.031116 | -2.740875 | 1.327603  | H  | -1.755731 | -0.975496 | 4.719560  |
| H                                              | -3.865610 | -4.547199 | -0.128336 | H  | -2.257676 | 0.669925  | 5.204042  |
| O                                              | -3.388496 | 0.820728  | -3.131405 | C  | -1.160474 | 2.138585  | -1.766866 |
| H                                              | -2.061049 | 2.733853  | -3.604107 | C  | -1.454375 | 3.104522  | -2.727697 |
| C                                              | -3.697131 | -1.916687 | -3.975359 | C  | -0.907433 | 4.404167  | -2.618566 |
| H                                              | -4.458964 | -1.168700 | -4.203550 | C  | -0.081607 | 4.770275  | -1.573207 |
| H                                              | -2.762423 | -1.573178 | -4.425581 | C  | 0.228525  | 3.822555  | -0.562216 |
| H                                              | -3.970912 | -2.865678 | -4.445667 | C  | -0.315180 | 2.512656  | -0.669566 |
| Co                                             | -0.867786 | -0.214811 | -0.199539 | N  | -0.085693 | 1.548294  | 0.276285  |
| C                                              | 0.054105  | -5.225044 | -3.221274 | C  | 0.671913  | 1.834282  | 1.325004  |
| C                                              | 0.191097  | -5.388642 | -4.740695 | C  | 1.264159  | 3.104133  | 1.505065  |
| H                                              | 0.906039  | -4.668752 | -5.148782 | C  | 1.044474  | 4.092268  | 0.568870  |
| H                                              | 0.541614  | -6.398778 | -4.975602 | N  | -1.582478 | 0.821914  | -1.706317 |
| H                                              | -0.767807 | -5.228498 | -5.242009 | H  | -1.148974 | 5.132814  | -3.387901 |
| C                                              | -0.982561 | -6.225163 | -2.664647 | H  | 0.330557  | 5.772873  | -1.507826 |
| H                                              | -0.670727 | -7.248607 | -2.897771 | H  | 1.483230  | 5.079308  | 0.686111  |
| H                                              | -1.079070 | -6.128013 | -1.580723 | H  | 1.878707  | 3.284795  | 2.380664  |
| H                                              | -1.968622 | -6.058201 | -3.111259 | H  | 0.808049  | 1.031041  | 2.042520  |
| C                                              | 1.420167  | -5.447324 | -2.534406 | C  | -2.692725 | 0.337547  | -2.301789 |
| H                                              | 2.179355  | -4.765969 | -2.930545 | C  | -3.021135 | -1.041013 | -1.758117 |
| H                                              | 1.352255  | -5.284554 | -1.456200 | C  | -3.506137 | -2.051661 | -2.618027 |
| H                                              | 1.757906  | -6.473526 | -2.714007 | C  | -2.766650 | -1.292312 | -0.365006 |
| C                                              | -0.423741 | -3.805467 | -2.908733 | C  | -3.782601 | -3.295347 | -2.034650 |
| O                                              | -0.617279 | -2.934093 | -3.738202 | C  | -3.091904 | -2.573623 | 0.135573  |
| O                                              | -0.606517 | -3.620067 | -1.593055 | C  | -3.596379 | -3.569511 | -0.684487 |
| H                                              | -0.881271 | -2.694295 | -1.431901 | H  | -2.964131 | -2.780983 | 1.192060  |
| O                                              | 4.258685  | -2.952974 | -2.287875 | H  | -3.835120 | -4.546995 | -0.281232 |
| H                                              | 4.478419  | -2.745502 | -3.207285 | O  | -3.421123 | 0.923951  | -3.125789 |
| O                                              | 1.363480  | 5.442651  | 0.681017  | H  | -2.106132 | 2.845195  | -3.550357 |
| H                                              | 1.851892  | 5.557077  | 1.508492  | C  | -3.641154 | -1.867896 | -4.110589 |
| <b>TS6-s-ArBr</b>                              |           |           |           | H  | -4.669064 | -2.067306 | -4.430921 |
| Energy = -2197.13307011 ZPE = -2196.506974 H = |           |           |           | H  | -3.377359 | -0.860100 | -4.416123 |
| -2196.461257 G = -2196.586156                  |           |           |           | H  | -2.991275 | -2.586787 | -4.618001 |
| Imaginary frequency: -47.43                    |           |           |           | Co | -0.899297 | -0.199200 | -0.237045 |
| C                                              | 0.916059  | -1.949604 | 1.009185  | C  | 0.091508  | -5.286186 | -3.065497 |
| C                                              | 1.618800  | -2.768310 | 1.897119  | C  | -0.017205 | -5.579863 | -4.567911 |
| C                                              | 2.853538  | -3.341030 | 1.515519  | H  | 0.553059  | -4.853313 | -5.152319 |
| C                                              | 3.416209  | -3.125771 | 0.271994  | H  | 0.371236  | -6.581136 | -4.779397 |
| C                                              | 2.731629  | -2.310271 | -0.667178 | H  | -1.058863 | -5.535660 | -4.900167 |
| C                                              | 1.486293  | -1.736965 | -0.293165 | C  | -0.736948 | -6.305682 | -2.257453 |
| N                                              | 0.738558  | -0.987569 | -1.164294 | H  | -0.374881 | -7.318042 | -2.465279 |
| C                                              | 1.201167  | -0.759638 | -2.385826 | H  | -0.651154 | -6.121455 | -1.184148 |
|                                                |           |           |           | H  | -1.795705 | -6.255800 | -2.530057 |

|    |           |           |           |
|----|-----------|-----------|-----------|
| C  | 1.570539  | -5.335031 | -2.614158 |
| H  | 2.174309  | -4.609230 | -3.168225 |
| H  | 1.666039  | -5.109175 | -1.548801 |
| H  | 1.977729  | -6.334637 | -2.798591 |
| C  | -0.413349 | -3.868618 | -2.795071 |
| O  | -0.630681 | -3.027039 | -3.649369 |
| O  | -0.557962 | -3.627790 | -1.482118 |
| H  | -0.822722 | -2.694854 | -1.355605 |
| Br | -4.854609 | 1.962302  | 4.484353  |
| Br | -4.437809 | -4.802253 | -3.160585 |

**TS6-s-ArCl**

Energy = -3091.19814619 ZPE = -3090.570562 H =  
-3090.525548 G = -3090.647563

Imaginary frequency: -49.17

|   |           |           |           |
|---|-----------|-----------|-----------|
| C | 0.915275  | -1.957939 | 1.030268  |
| C | 1.615413  | -2.776577 | 1.920336  |
| C | 2.849888  | -3.351231 | 1.540892  |
| C | 3.414325  | -3.137405 | 0.297856  |
| C | 2.731862  | -2.322481 | -0.643354 |
| C | 1.486133  | -1.748441 | -0.272044 |
| N | 0.739183  | -0.999173 | -1.144660 |
| C | 1.205875  | -0.770423 | -2.364895 |
| C | 2.446618  | -1.276345 | -2.808731 |
| C | 3.201624  | -2.054402 | -1.956915 |
| N | -0.276518 | -1.288168 | 1.221374  |
| H | 3.367855  | -3.980424 | 2.260289  |
| H | 4.365392  | -3.585335 | 0.025555  |
| H | 4.151176  | -2.473777 | -2.278013 |
| H | 2.779052  | -1.060620 | -3.818561 |
| H | 0.566782  | -0.177789 | -3.010640 |
| C | -1.100886 | -1.413621 | 2.299021  |
| C | -2.281946 | -0.501528 | 2.139245  |
| C | -2.898855 | 0.112328  | 3.250956  |
| C | -2.646308 | -0.152295 | 0.766204  |
| C | -3.872238 | 1.090474  | 2.997036  |
| C | -3.628970 | 0.881245  | 0.614944  |
| C | -4.221282 | 1.488710  | 1.698591  |
| H | -3.945157 | 1.175497  | -0.379395 |
| H | -4.965780 | 2.265669  | 1.555359  |
| O | -0.916576 | -2.184415 | 3.267967  |
| H | 1.196135  | -2.960092 | 2.899220  |
| C | -2.512526 | -0.178890 | 4.685062  |
| H | -3.372508 | -0.581875 | 5.232756  |
| H | -1.702180 | -0.899508 | 4.739287  |
| H | -2.225703 | 0.746668  | 5.196258  |
| C | -1.167351 | 2.115136  | -1.772681 |
| C | -1.459698 | 3.070915  | -2.744447 |
| C | -0.913659 | 4.371885  | -2.648535 |
| C | -0.090074 | 4.749955  | -1.605614 |
| C | 0.218254  | 3.813496  | -0.583616 |
| C | -0.324505 | 2.502006  | -0.677445 |
| N | -0.096893 | 1.548452  | 0.279730  |
| C | 0.657883  | 1.847158  | 1.326996  |
| C | 1.249103  | 3.119259  | 1.494383  |
| C | 1.031356  | 4.096561  | 0.546368  |
| N | -1.588598 | 0.798982  | -1.700166 |
| H | -1.153890 | 5.091893  | -3.426432 |
| H | 0.321551  | 5.753425  | -1.550455 |
| H | 1.469239  | 5.085178  | 0.653397  |
| H | 1.861234  | 3.310402  | 2.369515  |
| H | 0.792520  | 1.052025  | 2.054013  |
| C | -2.701713 | 0.311077  | -2.288768 |
| C | -3.029435 | -1.063249 | -1.736608 |

|    |           |           |           |
|----|-----------|-----------|-----------|
| C  | -3.520588 | -2.076684 | -2.586011 |
| C  | -2.763232 | -1.309562 | -0.343534 |
| C  | -3.790875 | -3.327900 | -2.006820 |
| C  | -3.077726 | -2.593820 | 0.159756  |
| C  | -3.584949 | -3.591288 | -0.654573 |
| H  | -2.939712 | -2.799219 | 1.215261  |
| H  | -3.815540 | -4.571177 | -0.250653 |
| O  | -3.431361 | 0.893658  | -3.115076 |
| H  | -2.109649 | 2.802275  | -3.565529 |
| C  | -3.677420 | -1.905138 | -4.078169 |
| H  | -4.709721 | -2.107969 | -4.382896 |
| H  | -3.419124 | -0.899547 | -4.395768 |
| H  | -3.034581 | -2.626850 | -4.591036 |
| Co | -0.899173 | -0.212517 | -0.225669 |
| C  | 0.101494  | -5.257071 | -3.110781 |
| C  | 0.112780  | -5.488973 | -4.627548 |
| H  | 0.746451  | -4.754889 | -5.132362 |
| H  | 0.496036  | -6.490594 | -4.846929 |
| H  | -0.895383 | -5.405380 | -5.044171 |
| C  | -0.820994 | -6.282260 | -2.418313 |
| H  | -0.466671 | -7.296420 | -2.630627 |
| H  | -0.828615 | -6.136929 | -1.335584 |
| H  | -1.849603 | -6.193853 | -2.782293 |
| C  | 1.534402  | -5.367000 | -2.540173 |
| H  | 2.202199  | -4.641070 | -3.014875 |
| H  | 1.546012  | -5.180870 | -1.463316 |
| H  | 1.928297  | -6.371384 | -2.727508 |
| C  | -0.404493 | -3.843338 | -2.823000 |
| O  | -0.628952 | -2.992426 | -3.666113 |
| O  | -0.556679 | -3.624466 | -1.507213 |
| H  | -0.831002 | -2.696147 | -1.365796 |
| Cl | -4.694305 | 1.911032  | 4.345171  |
| Cl | -4.389934 | -4.657823 | -3.013563 |

**TS6-s-ArMe**

Energy = -2250.64918097 ZPE = -2249.947343 H =  
-2249.901594 G = -2250.024357

Imaginary frequency: -88.04

|   |           |           |           |
|---|-----------|-----------|-----------|
| C | 0.906601  | -1.935661 | 1.090597  |
| C | 1.607575  | -2.752526 | 1.983030  |
| C | 2.830141  | -3.345870 | 1.596113  |
| C | 3.382736  | -3.152379 | 0.343850  |
| C | 2.698886  | -2.341215 | -0.599645 |
| C | 1.463046  | -1.749977 | -0.221749 |
| N | 0.712053  | -1.003308 | -1.094761 |
| C | 1.171245  | -0.791927 | -2.322430 |
| C | 2.402398  | -1.314993 | -2.772287 |
| C | 3.158743  | -2.092375 | -1.920893 |
| N | -0.271741 | -1.247412 | 1.286854  |
| H | 3.349879  | -3.972654 | 2.316593  |
| H | 4.326201  | -3.613443 | 0.066588  |
| H | 4.100559  | -2.525028 | -2.247191 |
| H | 2.726659  | -1.113003 | -3.787804 |
| H | 0.531309  | -0.201300 | -2.969117 |
| C | -1.099144 | -1.364575 | 2.360122  |
| C | -2.285399 | -0.455932 | 2.189635  |
| C | -2.893568 | 0.190689  | 3.284783  |
| C | -2.676902 | -0.153942 | 0.821235  |
| C | -3.902187 | 1.156771  | 3.065110  |
| C | -3.686674 | 0.837713  | 0.659621  |
| C | -4.265896 | 1.467202  | 1.744220  |
| H | -4.034539 | 1.083999  | -0.337870 |
| H | -5.035628 | 2.217701  | 1.571807  |
| O | -0.921329 | -2.127097 | 3.337285  |

|    |           |           |           |                             |                    |           |           |
|----|-----------|-----------|-----------|-----------------------------|--------------------|-----------|-----------|
| H  | 1.197386  | -2.918392 | 2.969003  | Energy = -2282.72844507     | ZPE = -2282.048192 | H =       |           |
| C  | -2.467992 | -0.052755 | 4.719623  | -2282.003009                | G = -2282.123745   |           |           |
| H  | -3.305354 | -0.454507 | 5.304982  | Imaginary frequency: -82.54 |                    |           |           |
| H  | -1.645069 | -0.758531 | 4.787047  | C                           | 0.902258           | -1.938510 | 1.220219  |
| H  | -2.180814 | 0.889557  | 5.202292  | C                           | 1.584441           | -2.745680 | 2.136802  |
| C  | -1.170160 | 2.098081  | -1.775255 | C                           | 2.813284           | -3.345016 | 1.781509  |
| C  | -1.461187 | 3.033172  | -2.770062 | C                           | 3.391918           | -3.165932 | 0.538631  |
| C  | -0.890910 | 4.325689  | -2.722467 | C                           | 2.730204           | -2.362584 | -0.427269 |
| C  | -0.042143 | 4.720652  | -1.705969 | C                           | 1.486282           | -1.767115 | -0.082528 |
| C  | 0.266636  | 3.809155  | -0.661875 | N                           | 0.758153           | -1.021989 | -0.976571 |
| C  | -0.302097 | 2.505164  | -0.704484 | C                           | 1.252595           | -0.809802 | -2.190754 |
| N  | -0.075260 | 1.577950  | 0.278287  | C                           | 2.492395           | -1.339203 | -2.608240 |
| C  | 0.706182  | 1.895885  | 1.300424  | C                           | 3.222952           | -2.120756 | -1.738351 |
| C  | 1.324163  | 3.160883  | 1.417824  | N                           | -0.278518          | -1.247944 | 1.383434  |
| C  | 1.105956  | 4.112326  | 0.443843  | H                           | 3.317434           | -3.964555 | 2.519251  |
| N  | -1.606972 | 0.791932  | -1.664810 | H                           | 4.340635           | -3.630709 | 0.286373  |
| H  | -1.131713 | 5.026185  | -3.518158 | H                           | 4.170569           | -2.558241 | -2.040595 |
| H  | 0.388376  | 5.717680  | -1.688248 | H                           | 2.843597           | -1.138816 | -3.615175 |
| H  | 1.563617  | 5.095612  | 0.511196  | H                           | 0.631234           | -0.220115 | -2.855363 |
| H  | 1.957066  | 3.367601  | 2.274725  | C                           | -1.120656          | -1.339079 | 2.446830  |
| H  | 0.842671  | 1.120064  | 2.048349  | C                           | -2.312290          | -0.448671 | 2.230360  |
| C  | -2.723433 | 0.295452  | -2.249394 | C                           | -2.934795          | 0.215939  | 3.306592  |
| C  | -3.046218 | -1.072207 | -1.690852 | C                           | -2.693628          | -0.193805 | 0.853537  |
| C  | -3.567542 | -2.093508 | -2.507973 | C                           | -3.964610          | 1.147668  | 3.045796  |
| C  | -2.711142 | -1.317278 | -0.306812 | C                           | -3.715657          | 0.778127  | 0.658874  |
| C  | -3.816931 | -3.374471 | -1.961087 | C                           | -4.324744          | 1.425966  | 1.713906  |
| C  | -2.996170 | -2.610434 | 0.195836  | H                           | -4.058313          | 0.990772  | -0.348287 |
| C  | -3.533342 | -3.600553 | -0.609773 | H                           | -5.109207          | 2.155220  | 1.517611  |
| H  | -2.807725 | -2.824652 | 1.242277  | O                           | -0.955332          | -2.064212 | 3.454891  |
| H  | -3.727762 | -4.583245 | -0.185064 | H                           | 1.154658           | -2.897473 | 3.116778  |
| O  | -3.446074 | 0.881441  | -3.083072 | C                           | -2.511528          | 0.047445  | 4.751008  |
| H  | -2.128400 | 2.751641  | -3.572562 | H                           | -3.281937          | -0.482894 | 5.329978  |
| C  | -3.787996 | -1.915913 | -3.994626 | H                           | -1.594502          | -0.528121 | 4.841072  |
| H  | -4.823692 | -2.151579 | -4.267857 | H                           | -2.382137          | 1.027910  | 5.225530  |
| H  | -3.577976 | -0.901568 | -4.321257 | C                           | -1.133512          | 2.005739  | -1.800757 |
| H  | -3.141198 | -2.609840 | -4.542848 | C                           | -1.404232          | 2.899362  | -2.839895 |
| Co | -0.908951 | -0.206268 | -0.182693 | C                           | -0.818147          | 4.185306  | -2.847398 |
| C  | 0.092963  | -5.254650 | -3.151914 | C                           | 0.028789           | 4.616562  | -1.844124 |
| C  | 0.115872  | -5.496427 | -4.666831 | C                           | 0.318237           | 3.749991  | -0.757074 |
| H  | 0.752495  | -4.764673 | -5.171551 | C                           | -0.268235          | 2.452681  | -0.741383 |
| H  | 0.502006  | -6.498884 | -4.877594 | N                           | -0.059990          | 1.570969  | 0.285899  |
| H  | -0.888785 | -5.416029 | -5.092431 | C                           | 0.720992           | 1.926856  | 1.295527  |
| C  | -0.830080 | -6.279823 | -2.459509 | C                           | 1.355898           | 3.187484  | 1.357740  |
| H  | -0.459148 | -7.293205 | -2.645677 | C                           | 1.155464           | 4.094304  | 0.338416  |
| H  | -0.863200 | -6.114005 | -1.380329 | N                           | -1.585087          | 0.711296  | -1.639526 |
| H  | -1.852094 | -6.215500 | -2.846633 | H                           | -1.044313          | 4.851058  | -3.676671 |
| C  | 1.521338  | -5.359473 | -2.570507 | H                           | 0.472022           | 5.607928  | -1.869028 |
| H  | 2.190661  | -4.633380 | -3.042428 | H                           | 1.625901           | 5.073665  | 0.361560  |
| H  | 1.524822  | -5.168899 | -1.494541 | H                           | 1.987495           | 3.426162  | 2.207413  |
| H  | 1.919320  | -6.363516 | -2.751398 | H                           | 0.844708           | 1.184903  | 2.079754  |
| C  | -0.426510 | -3.841902 | -2.875255 | C                           | -2.687586          | 0.191981  | -2.235399 |
| O  | -0.691225 | -3.013563 | -3.729562 | C                           | -3.020875          | -1.155411 | -1.643539 |
| O  | -0.543599 | -3.604474 | -1.561495 | C                           | -3.557230          | -2.183675 | -2.440505 |
| H  | -0.857744 | -2.688490 | -1.418175 | C                           | -2.668322          | -1.372613 | -0.257538 |
| C  | -4.571011 | 1.868210  | 4.216854  | C                           | -3.807603          | -3.450643 | -1.862825 |
| H  | -5.033523 | 1.167070  | 4.923439  | C                           | -2.944145          | -2.666039 | 0.262114  |
| H  | -3.861593 | 2.469186  | 4.801608  | C                           | -3.500764          | -3.666556 | -0.509942 |
| H  | -5.354236 | 2.542414  | 3.857943  | H                           | -2.743430          | -2.866329 | 1.309258  |
| C  | -4.341165 | -4.497861 | -2.821262 | H                           | -3.696388          | -4.642577 | -0.069741 |
| H  | -5.307144 | -4.253524 | -3.280479 | O                           | -3.386036          | 0.747198  | -3.111394 |
| H  | -3.654950 | -4.723675 | -3.647412 | H                           | -2.067495          | 2.588734  | -3.634858 |
| H  | -4.470418 | -5.412728 | -2.236283 | C                           | -3.795761          | -2.049364 | -3.927898 |
|    |           |           |           | H                           | -4.866466          | -2.119354 | -4.168745 |
|    |           |           |           | H                           | -3.441621          | -1.097159 | -4.311395 |

TS6-s-ArNH2

|    |           |           |           |
|----|-----------|-----------|-----------|
| H  | -3.286555 | -2.863490 | -4.455500 |
| Co | -0.900542 | -0.246880 | -0.122491 |
| C  | 0.048873  | -5.100915 | -3.343580 |
| C  | 0.067889  | -5.224270 | -4.873134 |
| H  | 0.733794  | -4.480560 | -5.319374 |
| H  | 0.416016  | -6.221418 | -5.161208 |
| H  | -0.931525 | -5.072234 | -5.291421 |
| C  | -0.924474 | -6.133746 | -2.735728 |
| H  | -0.629261 | -7.143132 | -3.041920 |
| H  | -0.913197 | -6.084644 | -1.644111 |
| H  | -1.950534 | -5.949387 | -3.071084 |
| C  | 1.469477  | -5.310355 | -2.772480 |
| H  | 2.170872  | -4.577218 | -3.183871 |
| H  | 1.475355  | -5.206895 | -1.684549 |
| H  | 1.827442  | -6.312544 | -3.031404 |
| C  | -0.414726 | -3.694647 | -2.958466 |
| O  | -0.639384 | -2.793135 | -3.747588 |
| O  | -0.533260 | -3.557063 | -1.630725 |
| H  | -0.824843 | -2.646395 | -1.416340 |
| N  | -4.269242 | -4.516872 | -2.655104 |
| N  | -4.568188 | 1.865647  | 4.099915  |
| H  | -5.443276 | 2.298103  | 3.828312  |
| H  | -4.708963 | 1.322291  | 4.943504  |
| H  | -4.921938 | -4.255643 | -3.383723 |
| H  | -4.638117 | -5.289580 | -2.114861 |

**TS6-s-ArOH**

Energy = -2322.45239912 ZPE = -2321.797841 H =  
-2321.752588 G = -2321.875213  
Imaginary frequency: -84.80

|   |           |           |           |
|---|-----------|-----------|-----------|
| C | 0.862476  | -2.006697 | 1.314191  |
| C | 1.536927  | -2.815694 | 2.233362  |
| C | 2.773883  | -3.404373 | 1.887474  |
| C | 3.364454  | -3.210561 | 0.652511  |
| C | 2.708817  | -2.404656 | -0.315659 |
| C | 1.456600  | -1.822505 | 0.019678  |
| N | 0.729987  | -1.073997 | -0.875815 |
| C | 1.243939  | -0.838272 | -2.079293 |
| C | 2.493504  | -1.352912 | -2.484630 |
| C | 3.217254  | -2.144275 | -1.617432 |
| N | -0.322598 | -1.318987 | 1.468932  |
| H | 3.274902  | -4.025293 | 2.626028  |
| H | 4.320477  | -3.664651 | 0.408474  |
| H | 4.171122  | -2.572172 | -1.913370 |
| H | 2.856726  | -1.135734 | -3.483783 |
| H | 0.624930  | -0.251646 | -2.747629 |
| C | -1.179650 | -1.425791 | 2.514937  |
| C | -2.372687 | -0.536903 | 2.283722  |
| C | -2.956960 | 0.167774  | 3.352652  |
| C | -2.781517 | -0.316363 | 0.911568  |
| C | -3.972940 | 1.099104  | 3.069260  |
| C | -3.804627 | 0.647434  | 0.703895  |
| C | -4.377185 | 1.345189  | 1.751334  |
| H | -4.170908 | 0.824748  | -0.301430 |
| H | -5.161703 | 2.074253  | 1.556241  |
| O | -1.038419 | -2.151098 | 3.524171  |
| H | 1.097426  | -2.975530 | 3.207973  |
| C | -2.521327 | 0.031336  | 4.795877  |
| H | -3.218428 | -0.606485 | 5.354265  |
| H | -1.535096 | -0.418851 | 4.880151  |
| H | -2.529191 | 1.009229  | 5.285926  |
| C | -1.201490 | 1.924724  | -1.727073 |
| C | -1.461844 | 2.804671  | -2.780379 |
| C | -0.907996 | 4.104966  | -2.778446 |

|    |           |           |           |
|----|-----------|-----------|-----------|
| C  | -0.104025 | 4.563626  | -1.752237 |
| C  | 0.171915  | 3.711682  | -0.650032 |
| C  | -0.382067 | 2.400307  | -0.643931 |
| N  | -0.187235 | 1.530915  | 0.396849  |
| C  | 0.548705  | 1.914422  | 1.430343  |
| C  | 1.149909  | 3.190678  | 1.503692  |
| C  | 0.962647  | 4.084676  | 0.470363  |
| N  | -1.629355 | 0.622130  | -1.567868 |
| H  | -1.124070 | 4.759482  | -3.619279 |
| H  | 0.315364  | 5.565446  | -1.770672 |
| H  | 1.407414  | 5.075721  | 0.501798  |
| H  | 1.744752  | 3.451918  | 2.373032  |
| H  | 0.661187  | 1.182477  | 2.225667  |
| C  | -2.714616 | 0.081877  | -2.180637 |
| C  | -3.055722 | -1.254220 | -1.574659 |
| C  | -3.593810 | -2.275112 | -2.382462 |
| C  | -2.714163 | -1.475298 | -0.187856 |
| C  | -3.811532 | -3.539372 | -1.807647 |
| C  | -2.952919 | -2.782137 | 0.318361  |
| C  | -3.483558 | -3.785522 | -0.469154 |
| H  | -2.743696 | -2.992665 | 1.361572  |
| H  | -3.653641 | -4.774558 | -0.047730 |
| O  | -3.389404 | 0.604058  | -3.092149 |
| H  | -2.092034 | 2.472609  | -3.593431 |
| C  | -3.875997 | -2.082922 | -3.856167 |
| H  | -4.754217 | -1.450642 | -4.011955 |
| H  | -3.035117 | -1.585330 | -4.340556 |
| H  | -4.043892 | -3.044956 | -4.342327 |
| Co | -0.934163 | -0.319670 | -0.044904 |
| C  | -0.119504 | -4.965046 | -3.547847 |
| C  | -0.125324 | -4.944723 | -5.082016 |
| H  | 0.589560  | -4.212701 | -5.467827 |
| H  | 0.144121  | -5.932716 | -5.469012 |
| H  | -1.114654 | -4.679931 | -5.466340 |
| C  | -1.156251 | -5.980662 | -3.020619 |
| H  | -0.925945 | -6.978825 | -3.408012 |
| H  | -1.144176 | -6.019363 | -1.928662 |
| H  | -2.167925 | -5.708494 | -3.337412 |
| C  | 1.288370  | -5.322642 | -3.020589 |
| H  | 2.032826  | -4.596600 | -3.363992 |
| H  | 1.306930  | -5.334466 | -1.927908 |
| H  | 1.580119  | -6.312909 | -3.386012 |
| C  | -0.482945 | -3.573999 | -3.026012 |
| O  | -0.678164 | -2.595836 | -3.726290 |
| O  | -0.552411 | -3.547444 | -1.687429 |
| H  | -0.792326 | -2.644636 | -1.388805 |
| O  | -4.540569 | 1.763124  | 4.133380  |
| O  | -4.334531 | -4.535945 | -2.604531 |
| H  | -5.172029 | 2.411902  | 3.795007  |
| H  | -4.347077 | -5.361075 | -2.101579 |

**TS6-t**

Energy = -2171.99849058 ZPE = -2171.353505 H =  
-2171.310096 G = -2171.431208  
Imaginary frequency: -234.77

|   |           |           |           |
|---|-----------|-----------|-----------|
| C | 0.742167  | -2.953417 | -0.070123 |
| C | 0.882492  | -4.322157 | -0.323012 |
| C | 0.031971  | -5.268843 | 0.290938  |
| C | -0.972740 | -4.899760 | 1.162542  |
| C | -1.153663 | -3.524861 | 1.465763  |
| C | -0.291464 | -2.558456 | 0.865581  |
| N | -0.403272 | -1.229904 | 1.158865  |
| C | -1.349013 | -0.808896 | 1.982370  |
| C | -2.262470 | -1.689542 | 2.600560  |



|    |           |           |           |    |           |           |           |
|----|-----------|-----------|-----------|----|-----------|-----------|-----------|
| C  | 1.751345  | -2.115190 | -1.441696 | H  | -4.207557 | -1.007792 | 3.532879  |
| C  | 2.713744  | -2.846163 | -2.174573 | C  | -1.047587 | -4.934792 | 3.195951  |
| C  | 1.977281  | -0.774627 | -1.081818 | H  | -2.135945 | -4.998629 | 3.113932  |
| C  | 3.897972  | -2.188275 | -2.536342 | H  | -0.636339 | -5.945207 | 3.266216  |
| C  | 3.164240  | -0.143768 | -1.458422 | H  | -0.845218 | -4.404356 | 4.130444  |
| C  | 4.123627  | -0.854394 | -2.184997 | Co | -1.367381 | -0.792275 | -0.116062 |
| H  | 4.651886  | -2.730324 | -3.103083 | C  | 4.258825  | -2.140228 | -1.235878 |
| H  | 3.342060  | 0.891087  | -1.181554 | O  | 3.425308  | -2.282806 | -2.117724 |
| H  | 5.052062  | -0.369993 | -2.481498 | O  | 4.460536  | -0.999332 | -0.573469 |
| O  | 0.136004  | -3.891461 | -1.090852 | C  | 5.212851  | -3.253808 | -0.779243 |
| H  | -0.572951 | -3.292013 | 1.703860  | C  | 6.663160  | -2.764732 | -0.991546 |
| C  | 2.516136  | -4.289197 | -2.580474 | H  | 7.364234  | -3.553957 | -0.700791 |
| H  | 3.371583  | -4.645244 | -3.163812 | H  | 6.846152  | -2.520078 | -2.043378 |
| H  | 2.387225  | -4.932482 | -1.706037 | H  | 6.870006  | -1.876079 | -0.390746 |
| H  | 1.605628  | -4.415287 | -3.173215 | C  | 4.982349  | -3.551717 | 0.717449  |
| Co | 0.512738  | 0.025358  | -0.151133 | H  | 3.973528  | -3.939181 | 0.894281  |
| C  | -1.431719 | 0.793758  | 1.863866  | H  | 5.694800  | -4.311199 | 1.055471  |
| O  | -0.657628 | 0.171801  | 2.674972  | H  | 5.123275  | -2.653210 | 1.323364  |
| O  | -1.222408 | 0.848189  | 0.628888  | C  | 4.957650  | -4.515889 | -1.614733 |
| C  | -2.626192 | 1.546219  | 2.465527  | H  | 5.638524  | -5.313000 | -1.300138 |
| C  | -3.594911 | 1.985155  | 1.358545  | H  | 3.931158  | -4.871860 | -1.492989 |
| H  | -4.433333 | 2.537946  | 1.796525  | H  | 5.116879  | -4.322157 | -2.678977 |
| H  | -3.093697 | 2.630492  | 0.632553  | O  | -2.777967 | -2.198428 | -1.125133 |
| H  | -3.993278 | 1.121606  | 0.820129  | C  | -3.327307 | -1.944529 | -2.203591 |
| C  | -3.347888 | 0.642555  | 3.482569  | O  | -2.728727 | -1.242020 | -3.151897 |
| H  | -2.662718 | 0.316557  | 4.268795  | C  | -4.765785 | -2.334690 | -2.508259 |
| H  | -4.176598 | 1.189404  | 3.945587  | C  | -5.591657 | -1.028920 | -2.375863 |
| H  | -3.753733 | -0.248316 | 2.993637  | H  | -6.645670 | -1.248592 | -2.571077 |
| C  | -2.039308 | 2.784240  | 3.181239  | H  | -5.511307 | -0.612511 | -1.366684 |
| H  | -2.844591 | 3.372150  | 3.634732  | H  | -5.255480 | -0.273411 | -3.090621 |
| H  | -1.341533 | 2.483459  | 3.967902  | C  | -4.879668 | -2.891129 | -3.940294 |
| H  | -1.503896 | 3.426918  | 2.473459  | H  | -4.540635 | -2.160966 | -4.678592 |
|    |           |           |           | H  | -4.284230 | -3.802476 | -4.056589 |
|    |           |           |           | H  | -5.924470 | -3.138274 | -4.151610 |
|    |           |           |           | C  | -5.251978 | -3.366328 | -1.479849 |
|    |           |           |           | H  | -4.660146 | -4.285078 | -1.531758 |
|    |           |           |           | H  | -5.178865 | -2.971521 | -0.463358 |
|    |           |           |           | H  | -6.297291 | -3.618029 | -1.681808 |
|    |           |           |           | C  | -0.970319 | 2.738822  | 1.027167  |
|    |           |           |           | C  | -2.050922 | 3.377774  | 1.631074  |
|    |           |           |           | C  | -2.599157 | 4.554036  | 1.069451  |
|    |           |           |           | C  | -2.101067 | 5.112793  | -0.087978 |
|    |           |           |           | C  | -0.999168 | 4.499414  | -0.738858 |
|    |           |           |           | C  | -0.433495 | 3.318179  | -0.175921 |
|    |           |           |           | N  | 0.636335  | 2.697279  | -0.746533 |
|    |           |           |           | C  | 1.169135  | 3.186945  | -1.855596 |
|    |           |           |           | C  | 0.666737  | 4.342447  | -2.491107 |
|    |           |           |           | C  | -0.413005 | 4.993273  | -1.931737 |
|    |           |           |           | N  | -0.319413 | 1.584217  | 1.444456  |
|    |           |           |           | H  | -3.446455 | 5.015808  | 1.567866  |
|    |           |           |           | H  | -2.537366 | 6.011814  | -0.512174 |
|    |           |           |           | H  | -0.822245 | 5.888093  | -2.392329 |
|    |           |           |           | H  | 1.137340  | 4.702386  | -3.399181 |
|    |           |           |           | H  | 2.032810  | 2.652703  | -2.235479 |
|    |           |           |           | C  | -0.515437 | 0.994552  | 2.667929  |
|    |           |           |           | C  | 0.597755  | 0.012393  | 2.950772  |
|    |           |           |           | C  | 1.288149  | 0.069008  | 4.187034  |
|    |           |           |           | C  | 1.114477  | -0.802051 | 1.933897  |
|    |           |           |           | C  | 2.460573  | -0.687527 | 4.326750  |
|    |           |           |           | C  | 2.260420  | -1.572536 | 2.087334  |
|    |           |           |           | C  | 2.962581  | -1.475696 | 3.288889  |
|    |           |           |           | H  | 2.997570  | -0.647482 | 5.270328  |
|    |           |           |           | H  | 2.607358  | -2.217368 | 1.294059  |
|    |           |           |           | H  | 3.883426  | -2.036079 | 3.423608  |

**TS10se**  
Energy = -3357.04813507 ZPE = -3355.977679 H =  
-3355.905093 G = -3356.087898  
Imaginary frequency: -284.00

|   |           |           |           |
|---|-----------|-----------|-----------|
| C | -3.454036 | -0.295135 | 1.664222  |
| C | -4.366636 | -0.320644 | 2.715302  |
| C | -5.480747 | 0.551144  | 2.718267  |
| C | -5.710409 | 1.454142  | 1.701444  |
| C | -4.804089 | 1.515870  | 0.611314  |
| C | -3.685850 | 0.636946  | 0.601143  |
| N | -2.775104 | 0.657338  | -0.418237 |
| C | -2.908622 | 1.519478  | -1.415712 |
| C | -3.988595 | 2.420423  | -1.485348 |
| C | -4.932592 | 2.411253  | -0.480095 |
| N | -2.317354 | -1.081577 | 1.503577  |
| H | -6.168024 | 0.502691  | 3.557747  |
| H | -6.567412 | 2.119789  | 1.721061  |
| H | -5.774202 | 3.097316  | -0.504933 |
| H | -4.055532 | 3.109666  | -2.318643 |
| H | -2.138118 | 1.489149  | -2.177561 |
| C | -1.956182 | -2.146244 | 2.306796  |
| C | -0.840057 | -2.897159 | 1.662306  |
| C | -0.452237 | -4.201472 | 2.018932  |
| C | -0.223585 | -2.232432 | 0.577008  |
| C | 0.513238  | -4.827455 | 1.213559  |
| C | 0.729903  | -2.879521 | -0.221036 |
| C | 1.076871  | -4.189646 | 0.100507  |
| H | 0.821474  | -5.840528 | 1.456519  |
| H | 1.232665  | -2.369054 | -1.030852 |
| H | 1.806460  | -4.715097 | -0.508574 |
| O | -2.500694 | -2.459024 | 3.368810  |



|    |           |           |           |   |           |           |           |
|----|-----------|-----------|-----------|---|-----------|-----------|-----------|
| O  | -1.387724 | 1.263380  | 3.497919  | C | 1.897113  | 2.723742  | 0.337728  |
| H  | -2.471751 | 2.955038  | 2.531218  | C | 2.710675  | 3.382052  | -0.616249 |
| C  | 0.821289  | 0.945215  | 5.327071  | C | 2.470395  | 2.176821  | 1.497881  |
| H  | 1.522763  | 0.889913  | 6.163343  | C | 4.082938  | 3.471505  | -0.349802 |
| H  | 0.736720  | 1.990826  | 5.014443  | C | 3.834555  | 2.296175  | 1.749079  |
| H  | -0.170857 | 0.646088  | 5.671688  | C | 4.643279  | 2.951033  | 0.819117  |
| Co | 1.319325  | 0.988679  | 0.415942  | H | 1.825108  | 1.669338  | 2.206051  |
| C  | 0.652340  | -0.201867 | -2.256103 | H | 4.725335  | 3.962890  | -1.075307 |
| O  | 1.542546  | 0.084836  | -1.431323 | H | 4.260636  | 1.880940  | 2.656911  |
| O  | -0.564980 | -0.474562 | -1.905736 | H | 5.710319  | 3.050431  | 0.995221  |
| C  | 0.948530  | -0.254001 | -3.759476 | O | -0.207025 | 3.599151  | -0.359075 |
| C  | 0.743916  | -1.712768 | -4.229839 | H | -1.599802 | 3.963494  | 1.628457  |
| H  | 0.928843  | -1.776646 | -5.306961 | C | 2.165368  | 3.954647  | -1.902505 |
| H  | 1.443750  | -2.379990 | -3.719421 | H | 1.511027  | 3.236827  | -2.403941 |
| H  | -0.275942 | -2.058929 | -4.040767 | H | 1.570680  | 4.851791  | -1.713112 |
| C  | -0.037995 | 0.689036  | -4.485618 | H | 2.982856  | 4.211250  | -2.581441 |
| H  | 0.045515  | 1.713807  | -4.108187 | C | -2.653146 | -5.140467 | -1.285903 |
| H  | 0.197020  | 0.703247  | -5.554333 | C | -3.143520 | -6.055603 | -2.232822 |
| H  | -1.076767 | 0.368188  | -4.377605 | C | -3.288468 | -7.427606 | -1.943344 |
| C  | 2.391611  | 0.186741  | -4.044437 | C | -2.962287 | -7.946412 | -0.708093 |
| H  | 2.585565  | 0.109980  | -5.119463 | C | -2.469377 | -7.075290 | 0.297412  |
| H  | 2.559842  | 1.222326  | -3.740561 | C | -2.307937 | -5.674669 | 0.025260  |
| H  | 3.096030  | -0.446015 | -3.505675 | N | -1.841835 | -4.819820 | 0.981706  |
| O  | 3.070576  | 1.728081  | 0.832533  | C | -1.539208 | -5.294342 | 2.177408  |
| C  | 3.861791  | 2.200465  | -0.080313 | C | -1.660244 | -6.655506 | 2.540637  |
| O  | 4.106296  | 1.612472  | -1.149874 | C | -2.124957 | -7.539208 | 1.594154  |
| C  | 4.524496  | 3.550187  | 0.258624  | N | -2.454484 | -3.791154 | -1.466934 |
| C  | 5.338522  | 4.066451  | -0.935165 | H | -3.669373 | -8.086411 | -2.720538 |
| H  | 5.814269  | 5.020301  | -0.682220 | H | -3.077637 | -9.004216 | -0.487934 |
| H  | 6.117433  | 3.353593  | -1.218323 | H | -2.237043 | -8.596331 | 1.822818  |
| H  | 4.696560  | 4.222902  | -1.807585 | H | -1.392106 | -6.980268 | 3.540998  |
| C  | 3.428737  | 4.569659  | 0.633481  | H | -1.178769 | -4.569872 | 2.907979  |
| H  | 2.773051  | 4.776192  | -0.218646 | C | -2.854988 | -3.131305 | -2.561108 |
| H  | 2.812018  | 4.191429  | 1.452471  | C | -2.518604 | -1.653656 | -2.421907 |
| H  | 3.886634  | 5.515200  | 0.944088  | C | -3.443249 | -0.623514 | -2.729154 |
| C  | 5.448632  | 3.317412  | 1.473974  | C | -1.285661 | -1.302973 | -1.882729 |
| H  | 4.876252  | 2.946806  | 2.328641  | C | -3.119460 | 0.713395  | -2.413852 |
| H  | 6.230470  | 2.586306  | 1.239395  | C | -0.965424 | 0.033941  | -1.535987 |
| H  | 5.937037  | 4.255136  | 1.761033  | C | -1.940938 | 1.040337  | -1.764583 |
| H  | 3.965859  | -0.218299 | -0.939846 | H | -0.583970 | -2.108475 | -1.681375 |
| H  | -1.828676 | -0.954963 | -2.812424 | H | -3.840512 | 1.493749  | -2.641515 |

**TS1-meta**

Energy = -2172.39472976 ZPE = -2171.741018 H =  
-2171.697702 G = -2171.81735

Imaginary frequency: -996.94

|   |           |           |          |    |           |           |           |
|---|-----------|-----------|----------|----|-----------|-----------|-----------|
| C | -1.540000 | 1.831749  | 1.350503 | H  | 0.159244  | 0.434029  | -2.063701 |
| C | -2.119935 | 3.025090  | 1.766959 | H  | -1.740337 | 2.063586  | -1.462305 |
| C | -3.395297 | 3.013249  | 2.381164 | O  | -3.454536 | -3.521223 | -3.594543 |
| C | -4.113140 | 1.848444  | 2.574409 | H  | -3.415595 | -5.675374 | -3.207333 |
| C | -3.562094 | 0.614315  | 2.142768 | C  | -4.783125 | -0.939567 | -3.331695 |
| C | -2.281004 | 0.638721  | 1.540092 | H  | -5.369950 | -0.033869 | -3.500750 |
| N | -1.683289 | -0.490961 | 1.065862 | H  | -4.652526 | -1.487497 | -4.268017 |
| C | -2.291236 | -1.671332 | 1.151129 | H  | -5.347737 | -1.611321 | -2.675573 |
| C | -3.558842 | -1.780716 | 1.759419 | Co | -0.026815 | -0.123842 | 0.199125  |
| C | -4.191267 | -0.653838 | 2.246205 | C  | 2.127809  | 0.108492  | -1.655778 |
| N | -0.252216 | 1.622553  | 0.834628 | O  | 1.722021  | -0.182825 | -0.479069 |
| H | -3.816626 | 3.960169  | 2.704317 | O  | 1.372894  | 0.645432  | -2.522953 |
| H | -5.091656 | 1.863713  | 3.042943 | C  | 3.543660  | -0.300854 | -2.060490 |
| H | -5.175174 | -0.723917 | 2.700912 | C  | 3.367929  | -1.638095 | -2.824786 |
| H | -4.015131 | -2.761928 | 1.814693 | H  | 4.349043  | -2.000466 | -3.147018 |
| H | -1.819990 | -2.551422 | 0.715694 | H  | 2.914242  | -2.401609 | -2.184503 |
| C | 0.413819  | 2.697857  | 0.201163 | H  | 2.738780  | -1.504366 | -3.709279 |
|   |           |           |          | C  | 4.150441  | 0.760195  | -2.995915 |
|   |           |           |          | H  | 4.286514  | 1.709434  | -2.471112 |
|   |           |           |          | H  | 5.129658  | 0.418368  | -3.344982 |
|   |           |           |          | H  | 3.511014  | 0.932357  | -3.864361 |
|   |           |           |          | C  | 4.433081  | -0.509812 | -0.826604 |
|   |           |           |          | H  | 5.432275  | -0.819691 | -1.148192 |

|   |          |           |           |
|---|----------|-----------|-----------|
| H | 4.526575 | 0.412637  | -0.249174 |
| H | 4.025657 | -1.283187 | -0.170900 |

**TS3-meta**

Energy = -2172.34973847 ZPE = -2171.696575 H =  
 -2171.652819 G = -2171.773929  
 Imaginary frequency: -1011.44

|   |           |           |           |
|---|-----------|-----------|-----------|
| C | -4.181018 | 3.927381  | 0.648254  |
| C | -5.199056 | 4.760502  | 0.153948  |
| C | -5.614009 | 5.920046  | 0.839415  |
| C | -5.042532 | 6.296911  | 2.036595  |
| C | -4.011422 | 5.496548  | 2.593552  |
| C | -3.568318 | 4.311218  | 1.914726  |
| N | -2.580548 | 3.524704  | 2.432854  |
| C | -2.029795 | 3.867734  | 3.584448  |
| C | -2.394769 | 5.014304  | 4.328130  |
| C | -3.386059 | 5.824462  | 3.824984  |
| N | -3.694787 | 2.783952  | 0.063793  |
| H | -6.405995 | 6.526860  | 0.406160  |
| H | -5.365998 | 7.190909  | 2.562968  |
| H | -3.704151 | 6.717974  | 4.356885  |
| H | -1.898538 | 5.236857  | 5.267586  |
| H | -1.247713 | 3.209033  | 3.962706  |
| C | -4.187471 | 2.254409  | -1.062738 |
| C | -3.435110 | 0.969741  | -1.375532 |
| C | -4.083273 | -0.229899 | -1.760963 |
| C | -2.055758 | 0.946738  | -1.182393 |
| C | -3.333332 | -1.421258 | -1.850780 |
| C | -1.300920 | -0.253720 | -1.217761 |
| C | -1.989167 | -1.456764 | -1.517730 |
| H | -1.567397 | 1.890649  | -0.948541 |
| H | -3.844230 | -2.341716 | -2.119396 |
| H | -0.190258 | -0.064434 | -1.869937 |
| H | -1.472177 | -2.410196 | -1.489237 |
| O | -5.125110 | 2.620258  | -1.815372 |
| H | -5.665730 | 4.484202  | -0.781224 |
| C | -5.565788 | -0.265675 | -2.005492 |
| H | -6.106340 | 0.026980  | -1.098167 |
| H | -5.840599 | 0.472525  | -2.762415 |
| H | -5.897879 | -1.261438 | -2.307892 |
| C | 1.789903  | -1.898162 | -0.140761 |
| C | 1.619229  | -2.499198 | -1.365999 |
| C | 2.738747  | -2.724935 | -2.200808 |
| C | 4.004418  | -2.345194 | -1.808444 |
| C | 4.206660  | -1.725691 | -0.546586 |
| C | 3.084751  | -1.503453 | 0.303689  |
| N | 3.180782  | -0.926226 | 1.532286  |
| C | 4.376547  | -0.546331 | 1.945732  |
| C | 5.556385  | -0.709789 | 1.177896  |
| C | 5.471568  | -1.302194 | -0.062099 |
| N | 0.709577  | -1.585875 | 0.755467  |
| H | 2.586028  | -3.198023 | -3.164760 |
| H | 4.859194  | -2.514614 | -2.456103 |
| H | 6.355058  | -1.447573 | -0.676619 |
| H | 6.505592  | -0.369945 | 1.576749  |
| H | 4.429230  | -0.088397 | 2.930565  |
| C | -0.246017 | -2.707327 | 1.133857  |
| C | -1.450963 | -2.130357 | 1.715214  |
| C | -2.414661 | -2.875573 | 2.434954  |
| C | -1.609959 | -0.758203 | 1.454328  |
| C | -3.528552 | -2.167731 | 2.896595  |
| C | -2.742839 | -0.078235 | 1.902669  |
| C | -3.690039 | -0.799071 | 2.639063  |

|    |           |           |           |
|----|-----------|-----------|-----------|
| H  | -4.291090 | -2.697106 | 3.460979  |
| H  | -2.899418 | 0.973788  | 1.666256  |
| H  | -4.577348 | -0.292566 | 3.010654  |
| O  | 0.064647  | -3.854468 | 0.922801  |
| H  | 0.633514  | -2.797292 | -1.698214 |
| C  | -2.264048 | -4.352262 | 2.690791  |
| H  | -3.071576 | -4.720954 | 3.327615  |
| H  | -2.274452 | -4.913040 | 1.750816  |
| H  | -1.306669 | -4.577605 | 3.171562  |
| Co | -0.255333 | 0.055677  | 0.424388  |
| C  | 1.515496  | 1.081720  | -1.608913 |
| O  | 0.910137  | 0.375040  | -2.476847 |
| O  | 1.140029  | 1.154711  | -0.395990 |
| C  | 2.705334  | 1.935938  | -2.059482 |
| C  | 3.698541  | 2.121199  | -0.900495 |
| H  | 4.517245  | 2.773320  | -1.220672 |
| H  | 3.213056  | 2.571185  | -0.032087 |
| H  | 4.128744  | 1.164264  | -0.593486 |
| C  | 3.402005  | 1.287686  | -3.266816 |
| H  | 2.709280  | 1.161246  | -4.101765 |
| H  | 4.232484  | 1.920771  | -3.594820 |
| H  | 3.801688  | 0.303199  | -3.005642 |
| C  | 2.102522  | 3.303843  | -2.463423 |
| H  | 2.903089  | 3.971937  | -2.796858 |
| H  | 1.385436  | 3.190980  | -3.282414 |
| H  | 1.592696  | 3.773089  | -1.616262 |
| H  | 1.193212  | -1.295542 | 1.630702  |

**TS5-meta**

Energy = -2171.90194126 ZPE = -2171.258857 H =  
 -2171.216085 G = -2171.333429  
 Imaginary frequency: -94.45

|   |           |           |           |
|---|-----------|-----------|-----------|
| C | -5.118055 | 0.402350  | 2.488977  |
| C | -6.076393 | 0.994969  | 3.332888  |
| C | -7.352506 | 0.433489  | 3.533622  |
| C | -7.736379 | -0.738670 | 2.916272  |
| C | -6.817517 | -1.396277 | 2.059041  |
| C | -5.508250 | -0.845575 | 1.837247  |
| N | -4.612645 | -1.474329 | 1.022010  |
| C | -4.961177 | -2.601493 | 0.426202  |
| C | -6.224816 | -3.217234 | 0.576196  |
| C | -7.145898 | -2.608149 | 1.396289  |
| N | -3.865698 | 0.879903  | 2.198855  |
| H | -8.047847 | 0.945371  | 4.195741  |
| H | -8.721867 | -1.168801 | 3.073589  |
| H | -8.131689 | -3.041159 | 1.549391  |
| H | -6.447576 | -4.143717 | 0.056266  |
| H | -4.206626 | -3.063652 | -0.211109 |
| C | -3.327078 | 1.949546  | 2.801035  |
| C | -1.922284 | 2.237297  | 2.277515  |
| C | -1.288735 | 3.506334  | 2.382339  |
| C | -1.208860 | 1.192724  | 1.687784  |
| C | 0.019140  | 3.665498  | 1.875876  |
| C | 0.075311  | 1.358429  | 1.115974  |
| C | 0.682528  | 2.639286  | 1.227669  |
| H | -1.705694 | 0.231164  | 1.669904  |
| H | 0.490825  | 4.641221  | 1.959065  |
| H | 0.860005  | 0.467988  | 1.148198  |
| H | 1.676795  | 2.760251  | 0.813182  |
| O | -3.792200 | 2.698445  | 3.699430  |
| H | -5.802892 | 1.912117  | 3.834457  |
| C | -1.969016 | 4.702061  | 2.992685  |
| H | -2.961391 | 4.849636  | 2.558853  |

|                                                |           |           |           |    |           |           |           |
|------------------------------------------------|-----------|-----------|-----------|----|-----------|-----------|-----------|
| H                                              | -2.142289 | 4.538034  | 4.059291  | C  | -2.485453 | 4.055549  | 3.797169  |
| H                                              | -1.369961 | 5.605788  | 2.851617  | C  | -3.841902 | 4.187967  | 3.980995  |
| C                                              | 1.452027  | -1.035601 | -1.566653 | N  | -4.477908 | 1.125307  | 0.260411  |
| C                                              | 2.619250  | -1.598132 | -2.073150 | H  | -8.054468 | 3.020495  | 2.510987  |
| C                                              | 2.904089  | -2.966021 | -1.848447 | H  | -6.552192 | 4.253232  | 4.064115  |
| C                                              | 2.053560  | -3.787959 | -1.139012 | H  | -4.241374 | 4.826854  | 4.765331  |
| C                                              | 0.850533  | -3.250838 | -0.607991 | H  | -1.770060 | 4.581149  | 4.422102  |
| C                                              | 0.567461  | -1.875405 | -0.818001 | H  | -0.966955 | 3.081971  | 2.593030  |
| N                                              | -0.561975 | -1.283633 | -0.324255 | C  | -5.143944 | 0.586822  | -0.774552 |
| C                                              | -1.451973 | -2.015111 | 0.340146  | C  | -4.248671 | -0.316663 | -1.608651 |
| C                                              | -1.253298 | -3.389993 | 0.582183  | C  | -4.734492 | -1.446661 | -2.306718 |
| C                                              | -0.104673 | -4.000560 | 0.121956  | C  | -2.876319 | -0.034442 | -1.677551 |
| N                                              | 0.988429  | 0.263778  | -1.720180 | C  | -3.815842 | -2.262833 | -2.996245 |
| H                                              | 3.826164  | -3.371227 | -2.254904 | C  | -1.944898 | -0.887568 | -2.294015 |
| H                                              | 2.283923  | -4.837124 | -0.982689 | C  | -2.447915 | -2.017383 | -2.965185 |
| H                                              | 0.077120  | -5.055558 | 0.307043  | H  | -2.541612 | 0.864954  | -1.160505 |
| H                                              | -2.007496 | -3.941861 | 1.131771  | H  | -4.191925 | -3.139417 | -3.519880 |
| H                                              | -2.355113 | -1.514480 | 0.687552  | H  | -0.844630 | -0.274760 | -2.924392 |
| C                                              | 1.643358  | 1.302730  | -2.374507 | H  | -1.760935 | -2.720627 | -3.430162 |
| C                                              | 0.846628  | 2.557565  | -2.260522 | O  | -6.343545 | 0.734410  | -1.127874 |
| C                                              | 1.153069  | 3.763092  | -2.921968 | H  | -7.128565 | 1.607291  | 0.709519  |
| C                                              | -0.301578 | 2.430303  | -1.459647 | C  | -6.194061 | -1.833319 | -2.309937 |
| C                                              | 0.253710  | 4.829139  | -2.756998 | H  | -6.598744 | -1.855342 | -1.294299 |
| C                                              | -1.178213 | 3.503063  | -1.312360 | H  | -6.791500 | -1.092604 | -2.847383 |
| C                                              | -0.897759 | 4.703874  | -1.975455 | H  | -6.334867 | -2.815232 | -2.771923 |
| H                                              | 0.461797  | 5.773461  | -3.253817 | C  | 2.034424  | -1.172310 | -0.538695 |
| H                                              | -2.046526 | 3.422268  | -0.663146 | C  | 3.372095  | -1.372793 | -0.834193 |
| H                                              | -1.569688 | 5.552349  | -1.871074 | C  | 4.370877  | -0.820521 | 0.009561  |
| O                                              | 2.688264  | 1.168083  | -3.013012 | C  | 4.058380  | -0.089832 | 1.138405  |
| H                                              | 3.301028  | -0.981728 | -2.639560 | C  | 2.695437  | 0.117386  | 1.484634  |
| C                                              | 2.378897  | 3.932374  | -3.786045 | C  | 1.703624  | -0.425996 | 0.629544  |
| H                                              | 2.424027  | 4.943544  | -4.200431 | N  | 0.367778  | -0.279071 | 0.876754  |
| H                                              | 3.293002  | 3.741866  | -3.216071 | C  | -0.041976 | 0.377220  | 1.949238  |
| H                                              | 2.384334  | 3.211529  | -4.608903 | C  | 0.879273  | 0.930821  | 2.868331  |
| Co                                             | -0.484382 | 0.695379  | -0.722413 | C  | 2.233782  | 0.811481  | 2.633805  |
| C                                              | 3.114638  | -0.032259 | 1.099590  | N  | 0.917376  | -1.686041 | -1.221565 |
| O                                              | 3.265253  | 1.039367  | 0.475964  | H  | 5.413110  | -0.983433 | -0.248923 |
| O                                              | 1.994460  | -0.523161 | 1.487585  | H  | 4.837589  | 0.324272  | 1.770578  |
| C                                              | 4.391143  | -0.826273 | 1.515119  | H  | 2.954761  | 1.244490  | 3.321279  |
| C                                              | 4.062213  | -2.268307 | 1.926483  | H  | 0.503467  | 1.453429  | 3.740350  |
| H                                              | 4.973693  | -2.791469 | 2.241910  | H  | -1.114047 | 0.504507  | 2.066236  |
| H                                              | 3.347968  | -2.285654 | 2.753395  | C  | 0.797705  | -3.091753 | -1.210861 |
| H                                              | 3.621295  | -2.822217 | 1.092186  | C  | -0.509596 | -3.505611 | -0.647778 |
| C                                              | 5.392780  | -0.826264 | 0.348148  | C  | -0.923423 | -4.843084 | -0.463118 |
| H                                              | 5.586130  | 0.195561  | 0.014244  | C  | -1.286341 | -2.426025 | -0.193391 |
| H                                              | 6.340696  | -1.286741 | 0.652136  | C  | -2.131253 | -5.050197 | 0.214960  |
| H                                              | 4.997062  | -1.390491 | -0.502527 | C  | -2.479427 | -2.656737 | 0.490797  |
| C                                              | 4.996939  | -0.064681 | 2.713786  | C  | -2.893014 | -3.977158 | 0.693540  |
| H                                              | 5.926263  | -0.542381 | 3.046885  | H  | -2.479544 | -6.067508 | 0.375443  |
| H                                              | 5.219074  | 0.970433  | 2.436488  | H  | -3.099998 | -1.826924 | 0.817840  |
| H                                              | 4.301228  | -0.049899 | 3.560717  | H  | -3.825252 | -4.176950 | 1.217199  |
| <b>TS7-meta</b>                                |           |           |           | O  | 1.723389  | -3.833701 | -1.539997 |
| Energy = -2171.92268291 ZPE = -2171.281509 H = |           |           |           | H  | 3.642986  | -1.962507 | -1.700506 |
| -2171.238605 G = -2171.357043                  |           |           |           | C  | -0.110086 | -6.015587 | -0.953793 |
| Imaginary frequency: -1417.04                  |           |           |           | H  | -0.631766 | -6.957864 | -0.762966 |
| C                                              | -5.074164 | 1.931895  | 1.194692  | H  | 0.094042  | -5.935912 | -2.025910 |
| C                                              | -6.457447 | 2.114870  | 1.387824  | H  | 0.868393  | -6.046152 | -0.465251 |
| C                                              | -6.974477 | 2.929741  | 2.412649  | Co | -0.630568 | -0.740855 | -0.740025 |
| C                                              | -6.150398 | 3.615955  | 3.280837  | C  | 0.438452  | 1.191905  | -2.576104 |
| C                                              | -4.745275 | 3.491629  | 3.135649  | O  | -0.027525 | 0.431907  | -3.500949 |
| C                                              | -4.189299 | 2.651797  | 2.108363  | O  | 0.095567  | 1.085581  | -1.369137 |
| N                                              | -2.838135 | 2.525783  | 1.958577  | C  | 1.487306  | 2.230096  | -2.985669 |
| C                                              | -2.036323 | 3.204221  | 2.761546  | C  | 1.884972  | 3.092406  | -1.779375 |
|                                                |           |           |           | H  | 2.648338  | 3.817487  | -2.080101 |

|   |          |          |           |
|---|----------|----------|-----------|
| H | 1.024647 | 3.640156 | -1.384240 |
| H | 2.289145 | 2.474529 | -0.972811 |
| C | 2.716449 | 1.446138 | -3.500722 |
| H | 2.449622 | 0.822579 | -4.357860 |
| H | 3.498467 | 2.148217 | -3.808188 |
| H | 3.123869 | 0.799437 | -2.716462 |
| C | 0.909828 | 3.106599 | -4.114720 |
| H | 1.664116 | 3.826668 | -4.448563 |
| H | 0.609866 | 2.494541 | -4.968915 |
| H | 0.034733 | 3.667429 | -3.768889 |

**1a-1AQ-s**

Energy = -1678.5196206 ZPE = -1677.982902 H = -1677.947497 G = -1678.048403

|    |           |           |           |
|----|-----------|-----------|-----------|
| C  | -1.534603 | -0.635474 | -1.632918 |
| C  | -2.400808 | -1.303116 | -2.489831 |
| C  | -3.445036 | -0.586018 | -3.123530 |
| C  | -3.639484 | 0.767860  | -2.928262 |
| C  | -2.766934 | 1.483514  | -2.066585 |
| C  | -1.722206 | 0.762335  | -1.433796 |
| N  | -0.840446 | 1.378572  | -0.590145 |
| C  | -0.938220 | 2.671226  | -0.324478 |
| C  | -1.941798 | 3.459030  | -0.925900 |
| C  | -2.849443 | 2.870791  | -1.783803 |
| N  | -0.464169 | -1.128641 | -0.909693 |
| H  | -4.113065 | -1.129443 | -3.784911 |
| H  | -4.445639 | 1.296240  | -3.426444 |
| H  | -3.635065 | 3.461781  | -2.244855 |
| H  | -1.988096 | 4.516466  | -0.693852 |
| H  | -0.221470 | 3.075208  | 0.379806  |
| C  | 0.188395  | -2.305461 | -1.087219 |
| C  | 1.451062  | -2.276609 | -0.262419 |
| C  | 2.713037  | -2.458822 | -0.858194 |
| C  | 1.343370  | -1.856889 | 1.086164  |
| C  | 3.841896  | -2.194575 | -0.074540 |
| C  | 2.500351  | -1.599218 | 1.843647  |
| C  | 3.747815  | -1.754334 | 1.253996  |
| H  | 0.371083  | -1.934646 | 1.571659  |
| H  | 4.825732  | -2.314902 | -0.520612 |
| H  | 2.406920  | -1.287911 | 2.878852  |
| H  | 4.653256  | -1.555691 | 1.818833  |
| O  | -0.137903 | -3.220888 | -1.848781 |
| H  | -2.264252 | -2.361643 | -2.663327 |
| C  | 2.853079  | -2.852401 | -2.307922 |
| H  | 3.898628  | -3.039221 | -2.564206 |
| H  | 2.261085  | -3.741163 | -2.534197 |
| H  | 2.481649  | -2.050724 | -2.957368 |
| Co | 0.284522  | 0.116901  | 0.292114  |
| C  | -1.923638 | -0.930678 | 1.827852  |
| O  | -1.080990 | 0.040008  | 1.577095  |
| O  | -1.728010 | -2.126800 | 1.605555  |
| C  | -3.247953 | -0.417804 | 2.439981  |
| C  | -4.134272 | -1.606371 | 2.834701  |
| H  | -5.076545 | -1.245883 | 3.261222  |
| H  | -4.361503 | -2.231722 | 1.967242  |
| H  | -3.636901 | -2.236070 | 3.578181  |
| C  | -2.945964 | 0.454841  | 3.673909  |
| H  | -2.312039 | 1.303333  | 3.405613  |
| H  | -3.879712 | 0.837429  | 4.100517  |
| H  | -2.433836 | -0.125374 | 4.449580  |
| C  | -3.949797 | 0.433918  | 1.358724  |
| H  | -4.910829 | 0.801256  | 1.735147  |
| H  | -3.334945 | 1.294014  | 1.080805  |

|   |           |           |           |
|---|-----------|-----------|-----------|
| H | -4.142506 | -0.154598 | 0.454779  |
| C | 2.237764  | 1.385581  | 0.243768  |
| O | 1.420557  | 1.444185  | 1.229016  |
| O | 1.885226  | 0.624073  | -0.720879 |
| C | 3.516964  | 2.196874  | 0.214775  |
| C | 3.103755  | 3.666762  | -0.039698 |
| H | 3.998858  | 4.295395  | -0.073939 |
| H | 2.576660  | 3.769783  | -0.993839 |
| H | 2.453573  | 4.034267  | 0.759460  |
| C | 4.212122  | 2.076526  | 1.585262  |
| H | 4.499440  | 1.040324  | 1.787033  |
| H | 5.116498  | 2.692510  | 1.592787  |
| H | 3.553056  | 2.412803  | 2.389260  |
| C | 4.435752  | 1.694134  | -0.909148 |
| H | 5.356104  | 2.285862  | -0.921291 |
| H | 4.699255  | 0.643341  | -0.758017 |
| H | 3.952551  | 1.784763  | -1.885406 |

**TS1-1AQ-s**

Energy = -1678.50633533 ZPE = -1677.974366 H = -1677.939669 G = -1678.039478

Imaginary frequency: -977.79

|    |           |           |           |
|----|-----------|-----------|-----------|
| C  | 0.005711  | 2.884425  | -0.360236 |
| C  | 0.142025  | 4.265105  | -0.251482 |
| C  | 0.619228  | 5.016638  | -1.351875 |
| C  | 0.956920  | 4.432132  | -2.556248 |
| C  | 0.823782  | 3.027303  | -2.710264 |
| C  | 0.349442  | 2.270566  | -1.605282 |
| N  | 0.194608  | 0.914600  | -1.682607 |
| C  | 0.485787  | 0.265570  | -2.797097 |
| C  | 0.950731  | 0.943120  | -3.944623 |
| C  | 1.122318  | 2.310959  | -3.898309 |
| N  | -0.438348 | 1.980675  | 0.592256  |
| H  | 0.718924  | 6.091765  | -1.234339 |
| H  | 1.317869  | 5.027642  | -3.388657 |
| H  | 1.486382  | 2.852158  | -4.766811 |
| H  | 1.173208  | 0.376124  | -4.841202 |
| H  | 0.357171  | -0.810803 | -2.772672 |
| C  | -1.143334 | 2.276456  | 1.726121  |
| C  | -1.629008 | 1.012768  | 2.375707  |
| C  | -2.741129 | 0.966185  | 3.234496  |
| C  | -0.930899 | -0.165053 | 2.004900  |
| C  | -3.143401 | -0.300856 | 3.689482  |
| C  | -1.372742 | -1.410764 | 2.480458  |
| C  | -2.477681 | -1.476163 | 3.325196  |
| H  | 0.348485  | -0.010009 | 2.202701  |
| H  | -4.006835 | -0.366040 | 4.346789  |
| H  | -0.840983 | -2.312966 | 2.193138  |
| H  | -2.826930 | -2.431921 | 3.705281  |
| O  | -1.381058 | 3.417469  | 2.143932  |
| H  | -0.124437 | 4.750610  | 0.676459  |
| C  | -3.512960 | 2.195388  | 3.650132  |
| H  | -4.395141 | 1.918234  | 4.233529  |
| H  | -2.888990 | 2.865503  | 4.247420  |
| H  | -3.831385 | 2.775418  | 2.779655  |
| Co | -0.259378 | 0.173088  | 0.079334  |
| C  | 2.204906  | 0.349459  | 1.460512  |
| O  | 1.641096  | 0.208005  | 0.328251  |
| O  | 1.585650  | 0.245205  | 2.559983  |
| C  | 3.689217  | 0.725269  | 1.444912  |
| C  | 4.299741  | 0.595951  | 2.847275  |
| H  | 5.353439  | 0.890485  | 2.817086  |
| H  | 3.781047  | 1.236198  | 3.565025  |
| H  | 4.241893  | -0.435078 | 3.208938  |

|   |           |           |           |   |           |           |           |
|---|-----------|-----------|-----------|---|-----------|-----------|-----------|
| C | 4.434923  | -0.176450 | 0.442819  | O | -0.958840 | 0.144473  | 1.603030  |
| H | 4.003115  | -0.090302 | -0.556794 | O | -1.472783 | -2.057709 | 1.666362  |
| H | 5.487779  | 0.119219  | 0.396333  | C | -3.094415 | -0.478118 | 2.511575  |
| H | 4.390107  | -1.226935 | 0.748947  | C | -3.376959 | -1.400848 | 3.710316  |
| C | 3.741126  | 2.197180  | 0.967477  | H | -4.376545 | -1.201550 | 4.111138  |
| H | 4.783006  | 2.529428  | 0.918737  | H | -3.321426 | -2.449797 | 3.410347  |
| H | 3.292079  | 2.300836  | -0.024189 | H | -2.650754 | -1.235021 | 4.513740  |
| H | 3.204589  | 2.855332  | 1.658825  | C | -3.130916 | 0.994470  | 2.944980  |
| C | -1.717137 | -1.428842 | -0.774305 | H | -2.958806 | 1.659340  | 2.094705  |
| O | -0.486501 | -1.694706 | -0.552355 | H | -4.110297 | 1.228546  | 3.376667  |
| O | -2.085381 | -0.233118 | -0.505549 | H | -2.365649 | 1.205582  | 3.698126  |
| C | -2.704568 | -2.449642 | -1.304753 | C | -4.143237 | -0.720893 | 1.401449  |
| C | -3.310330 | -1.892176 | -2.611411 | H | -5.145118 | -0.492440 | 1.780986  |
| H | -4.054241 | -2.594899 | -2.999429 | H | -3.954765 | -0.081448 | 0.533079  |
| H | -3.798276 | -0.929936 | -2.436132 | H | -4.123203 | -1.762372 | 1.069540  |
| H | -2.539340 | -1.754211 | -3.376776 | C | 2.238829  | 1.635173  | 0.257988  |
| C | -1.999188 | -3.788688 | -1.562033 | O | 1.286793  | 1.790756  | 1.101603  |
| H | -1.557639 | -4.184459 | -0.643259 | O | 2.054716  | 0.702335  | -0.598238 |
| H | -2.723060 | -4.517057 | -1.940298 | C | 3.515306  | 2.443897  | 0.293738  |
| H | -1.200467 | -3.679497 | -2.301266 | C | 3.929397  | 2.794700  | -1.148736 |
| C | -3.813479 | -2.616348 | -0.240677 | H | 4.878377  | 3.339184  | -1.133384 |
| H | -4.556149 | -3.336680 | -0.597470 | H | 4.056208  | 1.892167  | -1.751401 |
| H | -3.400795 | -2.984397 | 0.703895  | H | 3.178678  | 3.429091  | -1.631088 |
| H | -4.313572 | -1.664139 | -0.046566 | C | 3.313273  | 3.715249  | 1.132218  |

#### 1a-1AQ-t

Energy = -1678.51019423 ZPE = -1677.975514 H =  
-1677.939148 G = -1678.048208

|    |           |           |           |
|----|-----------|-----------|-----------|
| C  | -1.610887 | -0.665658 | -1.458343 |
| C  | -2.533767 | -1.524356 | -2.045381 |
| C  | -3.742264 | -1.016624 | -2.577659 |
| C  | -4.053363 | 0.326455  | -2.535586 |
| C  | -3.141086 | 1.236589  | -1.939803 |
| C  | -1.925766 | 0.730650  | -1.404459 |
| N  | -1.018470 | 1.546449  | -0.796981 |
| C  | -1.251650 | 2.844434  | -0.692638 |
| C  | -2.426139 | 3.434548  | -1.205489 |
| C  | -3.364451 | 2.632336  | -1.822458 |
| N  | -0.381239 | -1.006915 | -0.887364 |
| H  | -4.440668 | -1.716231 | -3.026175 |
| H  | -4.987500 | 0.699134  | -2.943649 |
| H  | -4.282555 | 3.057011  | -2.217803 |
| H  | -2.578381 | 4.502510  | -1.100098 |
| H  | -0.494032 | 3.426427  | -0.176916 |
| C  | 0.292187  | -2.192744 | -1.099329 |
| C  | 1.608121  | -2.272981 | -0.374092 |
| C  | 2.804737  | -2.367287 | -1.115666 |
| C  | 1.636998  | -2.215670 | 1.027111  |
| C  | 4.011837  | -2.386037 | -0.410084 |
| C  | 2.857506  | -2.233987 | 1.708864  |
| C  | 4.046348  | -2.315230 | 0.986584  |
| H  | 0.696169  | -2.180220 | 1.568368  |
| H  | 4.944300  | -2.444662 | -0.965428 |
| H  | 2.871853  | -2.191058 | 2.793758  |
| H  | 5.001787  | -2.326225 | 1.503007  |
| O  | -0.095865 | -3.082191 | -1.856284 |
| H  | -2.316636 | -2.580916 | -2.098209 |
| C  | 2.793090  | -2.394493 | -2.624907 |
| H  | 3.808775  | -2.446388 | -3.024374 |
| H  | 2.221459  | -3.247096 | -3.000105 |
| H  | 2.316638  | -1.491195 | -3.023846 |
| Co | 0.311445  | 0.298771  | 0.246165  |
| C  | -1.733584 | -0.877902 | 1.892005  |

|   |           |           |           |
|---|-----------|-----------|-----------|
| O | -0.958840 | 0.144473  | 1.603030  |
| O | -1.472783 | -2.057709 | 1.666362  |
| C | -3.094415 | -0.478118 | 2.511575  |
| C | -3.376959 | -1.400848 | 3.710316  |
| H | -4.376545 | -1.201550 | 4.111138  |
| H | -3.321426 | -2.449797 | 3.410347  |
| H | -2.650754 | -1.235021 | 4.513740  |
| C | -3.130916 | 0.994470  | 2.944980  |
| H | -2.958806 | 1.659340  | 2.094705  |
| H | -4.110297 | 1.228546  | 3.376667  |
| H | -2.365649 | 1.205582  | 3.698126  |
| C | -4.143237 | -0.720893 | 1.401449  |
| H | -5.145118 | -0.492440 | 1.780986  |
| H | -3.954765 | -0.081448 | 0.533079  |
| H | -4.123203 | -1.762372 | 1.069540  |
| C | 2.238829  | 1.635173  | 0.257988  |
| O | 1.286793  | 1.790756  | 1.101603  |
| O | 2.054716  | 0.702335  | -0.598238 |
| C | 3.515306  | 2.443897  | 0.293738  |
| C | 3.929397  | 2.794700  | -1.148736 |
| H | 4.878377  | 3.339184  | -1.133384 |
| H | 4.056208  | 1.892167  | -1.751401 |
| H | 3.178678  | 3.429091  | -1.631088 |
| C | 3.313273  | 3.715249  | 1.132218  |
| H | 3.012152  | 3.471409  | 2.154073  |
| H | 4.249921  | 4.279564  | 1.171957  |
| H | 2.543488  | 4.358082  | 0.694105  |
| C | 4.587033  | 1.530847  | 0.941845  |
| H | 5.543061  | 2.062564  | 0.972208  |
| H | 4.308965  | 1.263241  | 1.966128  |
| H | 4.714203  | 0.608784  | 0.368463  |

#### TS1-1AQ-t

Energy = -1678.49134373 ZPE = -1677.961151 H =  
-1677.9256 G = -1678.02975

Imaginary frequency: -837.01

|   |           |           |           |
|---|-----------|-----------|-----------|
| C | 0.052637  | 2.961758  | -0.275842 |
| C | 0.275005  | 4.322961  | -0.115907 |
| C | 0.800107  | 5.080367  | -1.192831 |
| C | 1.096846  | 4.514511  | -2.415557 |
| C | 0.874102  | 3.125781  | -2.617725 |
| C | 0.354963  | 2.368502  | -1.536801 |
| N | 0.116596  | 1.027064  | -1.649217 |
| C | 0.365933  | 0.393162  | -2.783495 |
| C | 0.870694  | 1.074183  | -3.910728 |
| C | 1.126148  | 2.428433  | -3.826618 |
| N | -0.438032 | 2.041784  | 0.652732  |
| H | 0.970364  | 6.141498  | -1.039079 |
| H | 1.496241  | 5.112920  | -3.228030 |
| H | 1.521479  | 2.970369  | -4.680652 |
| H | 1.057094  | 0.521146  | -4.823932 |
| H | 0.169737  | -0.673330 | -2.784806 |
| C | -1.118781 | 2.349416  | 1.817357  |
| C | -1.640785 | 1.093251  | 2.443223  |
| C | -2.772080 | 1.057341  | 3.274259  |
| C | -0.961725 | -0.092279 | 2.062007  |
| C | -3.218052 | -0.211675 | 3.681386  |
| C | -1.453017 | -1.340951 | 2.479506  |
| C | -2.579788 | -1.396015 | 3.293612  |
| H | 0.301570  | 0.017158  | 2.188987  |
| H | -4.099326 | -0.272526 | 4.314592  |
| H | -0.941055 | -2.247522 | 2.172548  |
| H | -2.968601 | -2.351211 | 3.633685  |
| O | -1.299510 | 3.487794  | 2.248138  |

|    |           |           |           |    |           |           |           |
|----|-----------|-----------|-----------|----|-----------|-----------|-----------|
| H  | 0.045247  | 4.794346  | 0.828939  | C  | 1.693185  | 2.200233  | 2.511416  |
| C  | -3.516239 | 2.298484  | 3.701171  | C  | 3.071497  | 2.243345  | 2.729622  |
| H  | -4.425024 | 2.035510  | 4.248375  | H  | 0.035486  | 0.967048  | 1.912408  |
| H  | -2.890212 | 2.928802  | 4.338724  | H  | 4.918832  | 1.144822  | 2.713106  |
| H  | -3.788246 | 2.912260  | 2.838021  | H  | 1.080837  | 3.084266  | 2.659928  |
| Co | -0.333371 | 0.251542  | 0.112822  | H  | 3.546448  | 3.167619  | 3.045891  |
| C  | 2.254312  | 0.260374  | 1.411229  | O  | 1.642123  | -2.517726 | 1.596026  |
| O  | 1.717662  | -0.027126 | 0.296481  | H  | -0.525757 | -3.031462 | 2.636325  |
| O  | 1.617534  | 0.261119  | 2.510824  | C  | 4.174082  | -1.323070 | 1.957010  |
| C  | 3.725805  | 0.697652  | 1.391559  | H  | 5.225364  | -1.033780 | 2.032830  |
| C  | 4.277175  | 0.858622  | 2.814347  | H  | 3.963044  | -2.085303 | 2.712308  |
| H  | 5.320942  | 1.187049  | 2.772454  | H  | 4.011244  | -1.803351 | 0.988294  |
| H  | 3.703583  | 1.598480  | 3.378567  | Co | -0.061520 | 0.222659  | -0.899115 |
| H  | 4.236087  | -0.087780 | 3.361803  | C  | -2.049511 | 1.867171  | 0.372408  |
| C  | 4.548805  | -0.341636 | 0.606282  | O  | -1.088734 | 1.843224  | -0.503567 |
| H  | 4.148414  | -0.472227 | -0.401804 | O  | -2.183170 | 1.043656  | 1.289611  |
| H  | 5.589577  | -0.010061 | 0.529835  | C  | -3.056739 | 3.023259  | 0.181664  |
| H  | 4.539226  | -1.314295 | 1.110014  | C  | -4.108449 | 3.006609  | 1.298745  |
| C  | 3.751165  | 2.054682  | 0.647985  | H  | -4.821528 | 3.827217  | 1.160817  |
| H  | 4.780439  | 2.421792  | 0.579227  | H  | -4.662562 | 2.063668  | 1.302347  |
| H  | 3.346718  | 1.949048  | -0.362376 | H  | -3.638881 | 3.118104  | 2.280480  |
| H  | 3.154748  | 2.805862  | 1.176992  | C  | -2.287907 | 4.359556  | 0.194679  |
| C  | -1.942275 | -1.417365 | -0.801169 | H  | -1.528014 | 4.375145  | -0.590386 |
| O  | -0.670939 | -1.543926 | -0.606900 | H  | -2.976465 | 5.196771  | 0.033340  |
| O  | -2.496994 | -0.326207 | -0.521938 | H  | -1.788093 | 4.514622  | 1.157759  |
| C  | -2.742596 | -2.594195 | -1.359562 | C  | -3.737733 | 2.829362  | -1.189936 |
| C  | -3.397572 | -2.129832 | -2.677558 | H  | -4.456922 | 3.634730  | -1.376931 |
| H  | -4.018882 | -2.932314 | -3.088502 | H  | -2.994672 | 2.831160  | -1.991870 |
| H  | -4.026055 | -1.251723 | -2.508683 | H  | -4.279521 | 1.877043  | -1.227890 |
| H  | -2.638397 | -1.871387 | -3.424088 | C  | 2.241424  | -0.023206 | -1.779517 |
| C  | -1.840008 | -3.810549 | -1.609390 | O  | 1.751586  | 1.081825  | -1.358073 |
| H  | -1.359878 | -4.141080 | -0.684044 | O  | 1.507662  | -1.058404 | -1.783933 |
| H  | -2.435680 | -4.639663 | -2.005404 | C  | 3.679164  | -0.054702 | -2.299423 |
| H  | -1.052466 | -3.576057 | -2.331210 | C  | 4.188581  | -1.500338 | -2.394764 |
| C  | -3.835560 | -2.940564 | -0.325059 | H  | 5.210403  | -1.510088 | -2.788301 |
| H  | -4.454222 | -3.763027 | -0.698759 | H  | 4.196303  | -1.981594 | -1.411865 |
| H  | -3.392245 | -3.251439 | 0.627012  | H  | 3.555205  | -2.098247 | -3.054610 |
| H  | -4.477799 | -2.076722 | -0.136002 | C  | 3.654449  | 0.592495  | -3.704258 |

#### 1a-1AQ-q

Energy = -1678.52204008 ZPE = -1677.989091 H =  
-1677.951977 G = -1678.061099

|   |           |           |           |
|---|-----------|-----------|-----------|
| C | -1.058615 | -1.955480 | 0.834599  |
| C | -1.284121 | -2.896893 | 1.876403  |
| C | -2.471363 | -3.628574 | 1.932643  |
| C | -3.467386 | -3.465432 | 0.975876  |
| C | -3.296142 | -2.542559 | -0.097171 |
| C | -2.095863 | -1.793471 | -0.174555 |
| N | -1.862242 | -0.915111 | -1.174667 |
| C | -2.793668 | -0.720379 | -2.105259 |
| C | -4.020213 | -1.407155 | -2.103388 |
| C | -4.269911 | -2.323863 | -1.099868 |
| N | 0.006392  | -1.158205 | 0.716880  |
| H | -2.620086 | -4.331607 | 2.745213  |
| H | -4.388818 | -4.035649 | 1.037289  |
| H | -5.203502 | -2.876993 | -1.069073 |
| H | -4.746942 | -1.210848 | -2.882919 |
| H | -2.558746 | 0.010669  | -2.871792 |
| C | 1.205978  | -1.382216 | 1.442905  |
| C | 1.886709  | -0.144269 | 1.895692  |
| C | 3.282309  | -0.118857 | 2.137534  |
| C | 1.107176  | 1.010948  | 2.089133  |
| C | 3.846910  | 1.097373  | 2.542518  |

|    |           |           |           |
|----|-----------|-----------|-----------|
| C  | 1.693185  | 2.200233  | 2.511416  |
| C  | 3.071497  | 2.243345  | 2.729622  |
| H  | 0.035486  | 0.967048  | 1.912408  |
| H  | 4.918832  | 1.144822  | 2.713106  |
| H  | 1.080837  | 3.084266  | 2.659928  |
| H  | 3.546448  | 3.167619  | 3.045891  |
| O  | 1.642123  | -2.517726 | 1.596026  |
| H  | -0.525757 | -3.031462 | 2.636325  |
| C  | 4.174082  | -1.323070 | 1.957010  |
| H  | 5.225364  | -1.033780 | 2.032830  |
| H  | 3.963044  | -2.085303 | 2.712308  |
| H  | 4.011244  | -1.803351 | 0.988294  |
| Co | -0.061520 | 0.222659  | -0.899115 |
| C  | -2.049511 | 1.867171  | 0.372408  |
| O  | -1.088734 | 1.843224  | -0.503567 |
| O  | -2.183170 | 1.043656  | 1.289611  |
| C  | -3.056739 | 3.023259  | 0.181664  |
| C  | -4.108449 | 3.006609  | 1.298745  |
| H  | -4.821528 | 3.827217  | 1.160817  |
| H  | -4.662562 | 2.063668  | 1.302347  |
| H  | -3.638881 | 3.118104  | 2.280480  |
| C  | -2.287907 | 4.359556  | 0.194679  |
| H  | -1.528014 | 4.375145  | -0.590386 |
| H  | -2.976465 | 5.196771  | 0.033340  |
| H  | -1.788093 | 4.514622  | 1.157759  |
| C  | -3.737733 | 2.829362  | -1.189936 |
| H  | -4.456922 | 3.634730  | -1.376931 |
| H  | -2.994672 | 2.831160  | -1.991870 |
| H  | -4.279521 | 1.877043  | -1.227890 |
| C  | 2.241424  | -0.023206 | -1.779517 |
| O  | 1.751586  | 1.081825  | -1.358073 |
| O  | 1.507662  | -1.058404 | -1.783933 |
| C  | 3.679164  | -0.054702 | -2.299423 |
| C  | 4.188581  | -1.500338 | -2.394764 |
| H  | 5.210403  | -1.510088 | -2.788301 |
| H  | 4.196303  | -1.981594 | -1.411865 |
| H  | 3.555205  | -2.098247 | -3.054610 |
| C  | 3.654449  | 0.592495  | -3.704258 |
| H  | 3.278796  | 1.618537  | -3.651868 |
| H  | 4.666509  | 0.614001  | -4.122153 |
| H  | 3.015022  | 0.023811  | -4.387969 |
| C  | 4.579601  | 0.774675  | -1.364066 |
| H  | 5.605821  | 0.783518  | -1.746320 |
| H  | 4.222783  | 1.804661  | -1.294054 |
| H  | 4.593997  | 0.354963  | -0.354096 |

#### TS1-1AQ-q

Energy = -1678.47620439 ZPE = -1677.948524 H =  
-1677.911923 G = -1678.020541

Imaginary frequency: -901.39

|   |           |          |           |
|---|-----------|----------|-----------|
| C | 0.030050  | 2.960348 | -0.415959 |
| C | 0.199038  | 4.362253 | -0.251074 |
| C | 0.625701  | 5.156728 | -1.318469 |
| C | 0.880396  | 4.615617 | -2.573761 |
| C | 0.708642  | 3.220723 | -2.808227 |
| C | 0.289259  | 2.392629 | -1.737338 |
| N | 0.083525  | 1.065584 | -1.899064 |
| C | 0.285121  | 0.509385 | -3.089095 |
| C | 0.706740  | 1.249952 | -4.208401 |
| C | 0.920098  | 2.607882 | -4.066747 |
| N | -0.360409 | 2.067386 | 0.505062  |
| H | 0.760711  | 6.221391 | -1.159409 |
| H | 1.206410  | 5.250768 | -3.391481 |
| H | 1.243434  | 3.212895 | -4.908262 |

|    |           |           |           |    |           |           |           |
|----|-----------|-----------|-----------|----|-----------|-----------|-----------|
| H  | 0.856881  | 0.751060  | -5.158754 | C  | -1.334038 | 2.814907  | -0.741855 |
| H  | 0.109595  | -0.560771 | -3.145311 | C  | -2.538253 | 3.363526  | -1.237676 |
| C  | -0.836890 | 2.368680  | 1.804171  | C  | -3.457163 | 2.520793  | -1.823539 |
| C  | -1.528450 | 1.188439  | 2.400481  | N  | -0.380914 | -1.052794 | -0.835321 |
| C  | -2.640196 | 1.369081  | 3.259018  | H  | -4.397747 | -1.852399 | -3.018327 |
| C  | -1.039226 | -0.098487 | 2.040736  | H  | -5.024353 | 0.546688  | -2.918457 |
| C  | -3.282358 | 0.214784  | 3.723112  | H  | -4.395622 | 2.905459  | -2.214049 |
| C  | -1.715429 | -1.213810 | 2.557058  | H  | -2.722795 | 4.428756  | -1.148674 |
| C  | -2.833106 | -1.064683 | 3.378807  | H  | -0.584817 | 3.438061  | -0.260174 |
| H  | 0.442942  | -0.134301 | 2.130217  | C  | 0.242390  | -2.248221 | -0.975637 |
| H  | -4.152802 | 0.320645  | 4.365595  | C  | 1.573887  | -2.306685 | -0.257373 |
| H  | -1.365004 | -2.211234 | 2.300168  | C  | 2.763841  | -2.511413 | -0.986157 |
| H  | -3.360381 | -1.936565 | 3.758282  | C  | 1.616562  | -2.141343 | 1.134576  |
| O  | -0.715943 | 3.463759  | 2.346616  | C  | 3.976261  | -2.525585 | -0.286977 |
| H  | 0.008998  | 4.792517  | 0.721468  | C  | 2.839612  | -2.161173 | 1.813203  |
| C  | -3.162189 | 2.727756  | 3.663968  | C  | 4.022985  | -2.347389 | 1.099365  |
| H  | -4.128588 | 2.634809  | 4.166759  | H  | 0.677643  | -2.018677 | 1.670728  |
| H  | -2.464310 | 3.229858  | 4.340479  | H  | 4.901845  | -2.667663 | -0.840064 |
| H  | -3.279667 | 3.390076  | 2.800969  | H  | 2.862231  | -2.033052 | 2.892159  |
| Co | -0.312377 | 0.050341  | -0.047566 | H  | 4.979996  | -2.359078 | 1.613979  |
| C  | 2.268378  | 0.186499  | 1.364094  | O  | -0.148897 | -3.227712 | -1.638491 |
| O  | 1.799405  | 0.077132  | 0.207874  | H  | -2.247993 | -2.653348 | -2.092650 |
| O  | 1.558190  | 0.009607  | 2.430248  | C  | 2.741046  | -2.668675 | -2.488114 |
| C  | 3.710483  | 0.656312  | 1.563773  | H  | 3.747628  | -2.824681 | -2.885792 |
| C  | 4.299737  | 0.093476  | 2.867515  | H  | 2.104904  | -3.506821 | -2.783146 |
| H  | 5.315875  | 0.475990  | 3.007839  | H  | 2.322272  | -1.774250 | -2.965058 |
| H  | 3.697155  | 0.382943  | 3.731212  | Co | 0.385004  | 0.351661  | 0.274143  |
| H  | 4.349005  | -0.999906 | 2.836947  | C  | -1.769392 | -0.724545 | 1.991663  |
| C  | 4.572757  | 0.247399  | 0.359053  | O  | -0.977168 | 0.239001  | 1.667536  |
| H  | 4.163707  | 0.648609  | -0.571004 | O  | -1.482113 | -1.933663 | 2.024703  |
| H  | 5.590805  | 0.628763  | 0.486637  | C  | -3.216310 | -0.302099 | 2.377612  |
| H  | 4.625905  | -0.842165 | 0.265299  | C  | -3.507380 | -0.818976 | 3.799110  |
| C  | 3.618198  | 2.201245  | 1.646195  | H  | -4.546636 | -0.612906 | 4.082019  |
| H  | 4.618645  | 2.624133  | 1.783274  | H  | -3.336339 | -1.897484 | 3.853156  |
| H  | 3.190484  | 2.615942  | 0.727503  | H  | -2.856095 | -0.333369 | 4.535676  |
| H  | 2.993091  | 2.511821  | 2.489090  | C  | -3.409003 | 1.219466  | 2.313896  |
| C  | -1.761032 | -1.750164 | -0.940527 | H  | -3.199193 | 1.597866  | 1.309845  |
| O  | -0.529761 | -1.945179 | -0.655408 | H  | -4.441358 | 1.481675  | 2.576785  |
| O  | -2.253034 | -0.586051 | -0.833683 | H  | -2.736973 | 1.732470  | 3.008285  |
| C  | -2.659071 | -2.913859 | -1.372277 | C  | -4.171047 | -0.983956 | 1.375001  |
| C  | -3.334468 | -2.540578 | -2.707316 | H  | -5.214770 | -0.766536 | 1.632523  |
| H  | -4.019670 | -3.336582 | -3.018152 | H  | -3.990345 | -0.629235 | 0.355269  |
| H  | -3.900860 | -1.611390 | -2.607553 | H  | -4.025584 | -2.067432 | 1.387168  |
| H  | -2.590202 | -2.405183 | -3.500223 | C  | 2.360799  | 1.647565  | 0.187371  |
| C  | -1.847523 | -4.207271 | -1.528220 | O  | 1.519863  | 1.768943  | 1.142241  |
| H  | -1.360511 | -4.481532 | -0.588529 | O  | 2.090302  | 0.814768  | -0.737826 |
| H  | -2.506861 | -5.028381 | -1.829899 | C  | 3.662260  | 2.441274  | 0.149259  |
| H  | -1.068303 | -4.094267 | -2.287913 | C  | 3.732432  | 3.188694  | -1.198604 |
| C  | -3.733945 | -3.088638 | -0.276402 | H  | 4.679234  | 3.733782  | -1.275614 |
| H  | -4.413518 | -3.904750 | -0.544206 | H  | 3.664210  | 2.487278  | -2.033932 |
| H  | -3.275136 | -3.327650 | 0.689090  | H  | 2.914674  | 3.912093  | -1.289725 |
| H  | -4.316597 | -2.171486 | -0.157348 | C  | 3.727722  | 3.434446  | 1.317628  |

### 2\_anion\_d

Energy = -1678.67331913 ZPE = -1678.139663 H =  
-1678.103172 G = -1678.208437

|   |           |           |           |
|---|-----------|-----------|-----------|
| C | -1.593344 | -0.731399 | -1.429178 |
| C | -2.497933 | -1.604209 | -2.037564 |
| C | -3.720514 | -1.132695 | -2.565829 |
| C | -4.078254 | 0.198729  | -2.514421 |
| C | -3.187127 | 1.130338  | -1.922220 |
| C | -1.947259 | 0.667548  | -1.388696 |
| N | -1.054833 | 1.526288  | -0.816909 |

### TSch\_anion\_d

Energy = -1678.64561477 ZPE = -1678.116867 H =  
-1678.081091 G = -1678.185385  
Imaginary frequency: -1341.42

|    |           |           |           |
|----|-----------|-----------|-----------|
| C  | -1.334038 | 2.814907  | -0.741855 |
| C  | -2.538253 | 3.363526  | -1.237676 |
| C  | -3.457163 | 2.520793  | -1.823539 |
| N  | -0.380914 | -1.052794 | -0.835321 |
| H  | -4.397747 | -1.852399 | -3.018327 |
| H  | -5.024353 | 0.546688  | -2.918457 |
| H  | -4.395622 | 2.905459  | -2.214049 |
| H  | -2.722795 | 4.428756  | -1.148674 |
| H  | -0.584817 | 3.438061  | -0.260174 |
| C  | 0.242390  | -2.248221 | -0.975637 |
| C  | 1.573887  | -2.306685 | -0.257373 |
| C  | 2.763841  | -2.511413 | -0.986157 |
| C  | 1.616562  | -2.141343 | 1.134576  |
| C  | 3.976261  | -2.525585 | -0.286977 |
| C  | 2.839612  | -2.161173 | 1.813203  |
| C  | 4.022985  | -2.347389 | 1.099365  |
| H  | 0.677643  | -2.018677 | 1.670728  |
| H  | 4.901845  | -2.667663 | -0.840064 |
| H  | 2.862231  | -2.033052 | 2.892159  |
| H  | 4.979996  | -2.359078 | 1.613979  |
| O  | -0.148897 | -3.227712 | -1.638491 |
| H  | -2.247993 | -2.653348 | -2.092650 |
| C  | 2.741046  | -2.668675 | -2.488114 |
| H  | 3.747628  | -2.824681 | -2.885792 |
| H  | 2.104904  | -3.506821 | -2.783146 |
| H  | 2.322272  | -1.774250 | -2.965058 |
| Co | 0.385004  | 0.351661  | 0.274143  |
| C  | -1.769392 | -0.724545 | 1.991663  |
| O  | -0.977168 | 0.239001  | 1.667536  |
| O  | -1.482113 | -1.933663 | 2.024703  |
| C  | -3.216310 | -0.302099 | 2.377612  |
| C  | -3.507380 | -0.818976 | 3.799110  |
| H  | -4.546636 | -0.612906 | 4.082019  |
| H  | -3.336339 | -1.897484 | 3.853156  |
| H  | -2.856095 | -0.333369 | 4.535676  |
| C  | -3.409003 | 1.219466  | 2.313896  |
| H  | -3.199193 | 1.597866  | 1.309845  |
| H  | -4.441358 | 1.481675  | 2.576785  |
| H  | -2.736973 | 1.732470  | 3.008285  |
| C  | -4.171047 | -0.983956 | 1.375001  |
| H  | -5.214770 | -0.766536 | 1.632523  |
| H  | -3.990345 | -0.629235 | 0.355269  |
| H  | -4.025584 | -2.067432 | 1.387168  |
| C  | 2.360799  | 1.647565  | 0.187371  |
| O  | 1.519863  | 1.768943  | 1.142241  |
| O  | 2.090302  | 0.814768  | -0.737826 |
| C  | 3.662260  | 2.441274  | 0.149259  |
| C  | 3.732432  | 3.188694  | -1.198604 |
| H  | 4.679234  | 3.733782  | -1.275614 |
| H  | 3.664210  | 2.487278  | -2.033932 |
| H  | 2.914674  | 3.912093  | -1.289725 |
| C  | 3.727722  | 3.434446  | 1.317628  |
| H  | 3.674566  | 2.915472  | 2.278578  |
| H  | 4.667794  | 3.995014  | 1.277758  |
| H  | 2.898762  | 4.147190  | 1.275557  |
| C  | 4.821986  | 1.424119  | 0.241454  |
| H  | 5.782839  | 1.947326  | 0.189416  |
| H  | 4.783479  | 0.868050  | 1.184114  |
| H  | 4.769186  | 0.701524  | -0.576708 |





|                                                 |           |           |           |                                               |           |           |           |
|-------------------------------------------------|-----------|-----------|-----------|-----------------------------------------------|-----------|-----------|-----------|
| H                                               | 2.595562  | 0.941790  | 4.175552  | C                                             | -1.802297 | -1.917770 | -0.955761 |
| C                                               | 4.008083  | -0.283144 | 2.125116  | O                                             | -0.659260 | -2.112020 | -0.451928 |
| H                                               | 4.087283  | -0.645961 | 1.095717  | O                                             | -2.238767 | -0.730744 | -1.136425 |
| H                                               | 5.008910  | -0.293499 | 2.573511  | C                                             | -2.720623 | -3.095714 | -1.316150 |
| H                                               | 3.373456  | -0.980525 | 2.677323  | C                                             | -3.196890 | -2.929151 | -2.772163 |
| C                                               | 4.365462  | 2.102564  | 1.410632  | H                                             | -3.899503 | -3.727618 | -3.036307 |
| H                                               | 5.339588  | 2.154201  | 1.910754  | H                                             | -3.695451 | -1.965979 | -2.905633 |
| H                                               | 4.528382  | 1.763595  | 0.382876  | H                                             | -2.352863 | -2.977079 | -3.469898 |
| H                                               | 3.933818  | 3.105112  | 1.371808  | C                                             | -1.987640 | -4.433007 | -1.144722 |
| <b>TSch_anion_quar</b>                          |           |           |           | H                                             | -1.641594 | -4.560269 | -0.115559 |
| Energy = -1678.6451462 ZPE = -1678.116174 H = - |           |           |           | H                                             | -2.657096 | -5.264467 | -1.392758 |
| 1678.080007 G = -1678.186385                    |           |           |           | H                                             | -1.112415 | -4.488986 | -1.799219 |
| Imaginary frequency: -235.05                    |           |           |           | C                                             | -3.933516 | -3.030941 | -0.361672 |
| C                                               | 0.142447  | 2.954444  | -0.344316 | H                                             | -4.620949 | -3.859666 | -0.565180 |
| C                                               | 0.566804  | 4.260656  | -0.077496 | H                                             | -3.612777 | -3.098215 | 0.683698  |
| C                                               | 1.259722  | 5.014305  | -1.051491 | H                                             | -4.473661 | -2.089101 | -0.489932 |
| C                                               | 1.542629  | 4.513047  | -2.305449 | <b>D'-3</b>                                   |           |           |           |
| C                                               | 1.128500  | 3.195081  | -2.632830 | Energy = -1824.9769947 ZPE = -1824.476625 H = |           |           |           |
| C                                               | 0.438156  | 2.416640  | -1.655793 | -1824.443825 G = -1824.538278                 |           |           |           |
| N                                               | 0.032488  | 1.140865  | -1.920503 | C                                             | -2.642695 | -0.822543 | 0.291622  |
| C                                               | 0.254685  | 0.611844  | -3.110836 | C                                             | -3.970465 | -1.052065 | 0.671468  |
| C                                               | 0.920303  | 1.309665  | -4.142751 | C                                             | -4.755591 | -2.006857 | -0.011103 |
| C                                               | 1.359820  | 2.592144  | -3.897140 | C                                             | -4.267704 | -2.751528 | -1.068315 |
| N                                               | -0.532239 | 2.088283  | 0.486804  | C                                             | -2.927801 | -2.555082 | -1.491694 |
| H                                               | 1.574296  | 6.023065  | -0.795563 | C                                             | -2.126584 | -1.593334 | -0.810877 |
| H                                               | 2.072328  | 5.105575  | -3.045646 | N                                             | -0.830050 | -1.353819 | -1.171498 |
| H                                               | 1.883412  | 3.157130  | -4.664002 | C                                             | -0.289199 | -2.025012 | -2.174883 |
| H                                               | 1.080578  | 0.830085  | -5.102482 | C                                             | -1.007888 | -2.998105 | -2.903186 |
| H                                               | -0.101292 | -0.404817 | -3.255522 | C                                             | -2.317876 | -3.259248 | -2.563475 |
| C                                               | -0.963861 | 2.375320  | 1.747900  | N                                             | -1.728166 | 0.051317  | 0.829778  |
| C                                               | -1.645769 | 1.182736  | 2.389677  | H                                             | -5.782256 | -2.155047 | 0.314658  |
| C                                               | -2.701858 | 1.352177  | 3.313061  | H                                             | -4.888478 | -3.481203 | -1.579575 |
| C                                               | -1.180848 | -0.101187 | 1.999863  | H                                             | -2.896460 | -4.001228 | -3.107279 |
| C                                               | -3.305059 | 0.195223  | 3.830082  | H                                             | -0.520792 | -3.523430 | -3.717744 |
| C                                               | -1.818436 | -1.221473 | 2.559561  | H                                             | 0.742421  | -1.779612 | -2.406019 |
| C                                               | -2.875204 | -1.082777 | 3.462235  | C                                             | -1.955048 | 0.924165  | 1.859364  |
| H                                               | 0.414570  | -0.105154 | 2.047483  | C                                             | -0.720741 | 1.725225  | 2.132886  |
| H                                               | -4.131217 | 0.301956  | 4.530387  | C                                             | -0.629515 | 2.683945  | 3.169283  |
| H                                               | -1.491233 | -2.216781 | 2.262609  | C                                             | 0.371210  | 1.454134  | 1.273766  |
| H                                               | -3.369820 | -1.957872 | 3.879609  | C                                             | 0.586658  | 3.362973  | 3.324982  |
| O                                               | -0.842870 | 3.463524  | 2.344457  | C                                             | 1.567462  | 2.154643  | 1.464095  |
| H                                               | 0.349506  | 4.682057  | 0.893371  | C                                             | 1.674117  | 3.102067  | 2.485491  |
| C                                               | -3.219183 | 2.707744  | 3.743375  | H                                             | 0.681426  | 4.103811  | 4.116033  |
| H                                               | -4.137392 | 2.603264  | 4.330398  | H                                             | 2.415509  | 1.958642  | 0.813440  |
| H                                               | -2.476484 | 3.241836  | 4.342352  | H                                             | 2.606282  | 3.644966  | 2.632218  |
| H                                               | -3.425629 | 3.350634  | 2.882493  | O                                             | -3.027929 | 1.039821  | 2.484703  |
| Co                                              | -0.576834 | 0.107887  | -0.085722 | H                                             | -4.379839 | -0.485436 | 1.495070  |
| C                                               | 2.128808  | 0.263104  | 1.158793  | C                                             | -1.774855 | 3.001814  | 4.104418  |
| O                                               | 1.651518  | 0.001713  | 0.042521  | H                                             | -2.650626 | 3.359461  | 3.555440  |
| O                                               | 1.473409  | 0.088237  | 2.276192  | H                                             | -2.110420 | 2.111181  | 4.643392  |
| C                                               | 3.521622  | 0.879153  | 1.311720  | H                                             | -1.476678 | 3.764443  | 4.831246  |
| C                                               | 4.355589  | 0.025969  | 2.287803  | C                                             | 2.645989  | -0.813839 | -0.285495 |
| H                                               | 5.339837  | 0.483625  | 2.432929  | C                                             | 3.974475  | -1.041032 | -0.664224 |
| H                                               | 3.861542  | -0.051156 | 3.259516  | C                                             | 4.764090  | -1.986446 | 0.026138  |
| H                                               | 4.506613  | -0.986121 | 1.896701  | C                                             | 4.279940  | -2.723976 | 1.090075  |
| C                                               | 4.210394  | 0.964732  | -0.057560 | C                                             | 2.939370  | -2.529775 | 1.512349  |
| H                                               | 3.621171  | 1.568010  | -0.753709 | C                                             | 2.133662  | -1.577404 | 0.823719  |
| H                                               | 5.198539  | 1.423482  | 0.052585  | N                                             | 0.836222  | -1.340620 | 1.182712  |
| H                                               | 4.337958  | -0.028250 | -0.498632 | C                                             | 0.298621  | -2.005688 | 2.191898  |
| C                                               | 3.322043  | 2.300247  | 1.889462  | C                                             | 1.021856  | -2.969370 | 2.928195  |
| H                                               | 4.295065  | 2.787753  | 2.012351  | C                                             | 2.332915  | -3.227525 | 2.590300  |
| H                                               | 2.711046  | 2.913541  | 1.218870  | N                                             | 1.727861  | 0.052294  | -0.830019 |
| H                                               | 2.826679  | 2.259896  | 2.862921  |                                               |           |           |           |

|    |           |           |           |
|----|-----------|-----------|-----------|
| H  | 5.791224  | -2.133045 | -0.298856 |
| H  | 4.904106  | -3.446489 | 1.607344  |
| H  | 2.914965  | -3.962258 | 3.140208  |
| H  | 0.537305  | -3.489980 | 3.747287  |
| H  | -0.734013 | -1.762833 | 2.421209  |
| C  | 1.949491  | 0.914438  | -1.869609 |
| C  | 0.712567  | 1.709938  | -2.147673 |
| C  | 0.617567  | 2.660835  | -3.190883 |
| C  | -0.377352 | 1.442967  | -1.284665 |
| C  | -0.600168 | 3.336518  | -3.349155 |
| C  | -1.575212 | 2.139897  | -1.477725 |
| C  | -1.685511 | 3.079816  | -2.505668 |
| H  | -0.697759 | 4.071463  | -4.145345 |
| H  | -2.421669 | 1.947133  | -0.824037 |
| H  | -2.618884 | 3.620083  | -2.654422 |
| O  | 3.020168  | 1.025822  | -2.499560 |
| H  | 4.380650  | -0.479846 | -1.493097 |
| C  | 1.760561  | 2.974305  | -4.130386 |
| H  | 1.459405  | 3.730965  | -4.862192 |
| H  | 2.636458  | 3.337997  | -3.585537 |
| H  | 2.097212  | 2.080489  | -4.663304 |
| Co | -0.000228 | 0.081752  | -0.000159 |

#### TS6c-s

Energy = -1824.9267333 ZPE = -1824.429127 H = -1824.396384 G = -1824.490945

Imaginary frequency: -110.90

|   |           |           |           |
|---|-----------|-----------|-----------|
| C | 0.913316  | -1.907777 | 1.204156  |
| C | 1.611597  | -2.703650 | 2.115410  |
| C | 2.732170  | -3.453759 | 1.691521  |
| C | 3.178005  | -3.441216 | 0.383331  |
| C | 2.487656  | -2.659987 | -0.581466 |
| C | 1.360326  | -1.900965 | -0.161644 |
| N | 0.619951  | -1.143050 | -1.033629 |
| C | 0.969655  | -1.110812 | -2.314362 |
| C | 2.081284  | -1.822019 | -2.815906 |
| C | 2.837410  | -2.592335 | -1.957055 |
| N | -0.187975 | -1.106448 | 1.418865  |
| H | 3.257806  | -4.057316 | 2.427384  |
| H | 4.042834  | -4.023271 | 0.078311  |
| H | 3.694502  | -3.154456 | -2.317925 |
| H | 2.321928  | -1.756812 | -3.872093 |
| H | 0.340672  | -0.502120 | -2.956966 |
| C | -1.033326 | -1.196462 | 2.478337  |
| C | -2.266168 | -0.374686 | 2.224390  |
| C | -2.913808 | 0.286774  | 3.287043  |
| C | -2.680601 | -0.173456 | 0.853960  |
| C | -3.968980 | 1.164670  | 3.004781  |
| C | -3.763526 | 0.722436  | 0.636639  |
| C | -4.380182 | 1.384194  | 1.684254  |
| H | -4.465253 | 1.682635  | 3.821269  |
| H | -4.128332 | 0.872460  | -0.374048 |
| H | -5.200701 | 2.068395  | 1.480377  |
| O | -0.858178 | -1.871174 | 3.515156  |
| H | 1.278519  | -2.734858 | 3.143383  |
| C | -2.478437 | 0.120289  | 4.727834  |
| H | -2.676035 | -0.892778 | 5.087329  |
| H | -1.401699 | 0.273865  | 4.842837  |
| H | -3.004709 | 0.832786  | 5.370440  |
| C | -1.149026 | 2.171304  | -1.704433 |
| C | -1.468482 | 3.096634  | -2.701399 |
| C | -0.956774 | 4.412761  | -2.641167 |
| C | -0.139594 | 4.841662  | -1.612336 |
| C | 0.195578  | 3.940756  | -0.566555 |

|    |           |           |           |
|----|-----------|-----------|-----------|
| C  | -0.313853 | 2.613644  | -0.621221 |
| N  | -0.062471 | 1.689949  | 0.361873  |
| C  | 0.687355  | 2.043631  | 1.399058  |
| C  | 1.245029  | 3.334155  | 1.528724  |
| C  | 1.002338  | 4.278608  | 0.553219  |
| N  | -1.535332 | 0.852991  | -1.590966 |
| H  | -1.218167 | 5.105298  | -3.437522 |
| H  | 0.245312  | 5.856987  | -1.585302 |
| H  | 1.414339  | 5.281138  | 0.630732  |
| H  | 1.852913  | 3.566257  | 2.397231  |
| H  | 0.845066  | 1.273968  | 2.148726  |
| C  | -2.581799 | 0.279151  | -2.242454 |
| C  | -2.867070 | -1.075376 | -1.662498 |
| C  | -3.341712 | -2.119835 | -2.481252 |
| C  | -2.505880 | -1.310457 | -0.279584 |
| C  | -3.446877 | -3.412272 | -1.950071 |
| C  | -2.640592 | -2.645854 | 0.197877  |
| C  | -3.084924 | -3.668517 | -0.620694 |
| H  | -3.804060 | -4.221897 | -2.581049 |
| H  | -2.409653 | -2.859672 | 1.236149  |
| H  | -3.168205 | -4.677754 | -0.223572 |
| O  | -3.243393 | 0.785973  | -3.174020 |
| H  | -2.111502 | 2.786791  | -3.513142 |
| C  | -3.696606 | -1.907065 | -3.938004 |
| H  | -4.562059 | -1.248347 | -4.044447 |
| H  | -2.882760 | -1.419601 | -4.482825 |
| H  | -3.917069 | -2.864063 | -4.420894 |
| Co | -0.825466 | -0.116388 | -0.095389 |

#### TS6c-t

Energy = -1824.91881755 ZPE = -1824.422593 H = -1824.389003 G = -1824.488389

Imaginary frequency: -232.91

|   |           |           |           |
|---|-----------|-----------|-----------|
| C | 0.695786  | -2.939256 | -0.171222 |
| C | 0.740196  | -4.281289 | -0.563243 |
| C | -0.140108 | -5.233632 | -0.003276 |
| C | -1.076112 | -4.897208 | 0.954739  |
| C | -1.151252 | -3.553367 | 1.405473  |
| C | -0.262499 | -2.582234 | 0.853329  |
| N | -0.271635 | -1.284751 | 1.278519  |
| C | -1.135009 | -0.899814 | 2.203720  |
| C | -2.064986 | -1.785090 | 2.791835  |
| C | -2.065991 | -3.105171 | 2.394286  |
| N | 1.436519  | -1.887309 | -0.656891 |
| H | -0.074371 | -6.263126 | -0.346959 |
| H | -1.749434 | -5.639710 | 1.373005  |
| H | -2.762017 | -3.816378 | 2.831751  |
| H | -2.755642 | -1.420444 | 3.544803  |
| H | -1.087739 | 0.149262  | 2.485213  |
| C | 2.627769  | -2.010181 | -1.299031 |
| C | 3.222945  | -0.654041 | -1.580711 |
| C | 4.090314  | -0.450722 | -2.677582 |
| C | 2.817436  | 0.445297  | -0.757525 |
| C | 4.512752  | 0.852416  | -2.974515 |
| C | 3.259248  | 1.738419  | -1.105576 |
| C | 4.086227  | 1.938227  | -2.204350 |
| H | 5.167676  | 1.017231  | -3.826471 |
| H | 2.964529  | 2.585748  | -0.495997 |
| H | 4.411413  | 2.944342  | -2.459578 |
| O | 3.203444  | -3.074918 | -1.612407 |
| H | 1.464327  | -4.575518 | -1.310239 |
| C | 4.547335  | -1.579032 | -3.577694 |
| H | 5.187588  | -2.281740 | -3.038539 |
| H | 3.702880  | -2.169914 | -3.943296 |

|    |           |           |           |
|----|-----------|-----------|-----------|
| H  | 5.098941  | -1.182670 | -4.436022 |
| C  | -0.484292 | 2.542017  | 0.245566  |
| C  | -1.009043 | 3.789521  | 0.600040  |
| C  | -2.146026 | 4.314685  | -0.053247 |
| C  | -2.790349 | 3.636675  | -1.068995 |
| C  | -2.288720 | 2.375450  | -1.484322 |
| C  | -1.134662 | 1.836722  | -0.839382 |
| N  | -0.594733 | 0.643678  | -1.226996 |
| C  | -1.159038 | -0.050871 | -2.200977 |
| C  | -2.314222 | 0.392667  | -2.881459 |
| C  | -2.869147 | 1.603146  | -2.524492 |
| N  | 0.570751  | 1.870370  | 0.817151  |
| H  | -2.522339 | 5.284268  | 0.263947  |
| H  | -3.666684 | 4.050919  | -1.558939 |
| H  | -3.752774 | 1.980645  | -3.032710 |
| H  | -2.742190 | -0.215076 | -3.671647 |
| H  | -0.677815 | -0.994146 | -2.447212 |
| C  | 1.536459  | 2.444108  | 1.581988  |
| C  | 2.594117  | 1.434734  | 1.952892  |
| C  | 3.348589  | 1.571843  | 3.140199  |
| C  | 2.755563  | 0.284626  | 1.115687  |
| C  | 4.228959  | 0.543777  | 3.505076  |
| C  | 3.644618  | -0.726489 | 1.532095  |
| C  | 4.362533  | -0.601721 | 2.715443  |
| H  | 4.802097  | 0.636697  | 4.424158  |
| H  | 3.783637  | -1.604362 | 0.910242  |
| H  | 5.039599  | -1.395576 | 3.022945  |
| O  | 1.596765  | 3.640840  | 1.937905  |
| H  | -0.525136 | 4.345076  | 1.391185  |
| C  | 3.211486  | 2.763553  | 4.064125  |
| H  | 3.554290  | 3.682211  | 3.581692  |
| H  | 2.167305  | 2.943869  | 4.335159  |
| H  | 3.790527  | 2.604657  | 4.979262  |
| Co | 1.041892  | 0.002597  | 0.083990  |

5. Powers, D. C.; Benitez, D.; Tkatchouk, E.; Goddard, W. A.; Ritter, T., Bimetallic Reductive Elimination from Dinuclear Pd(III) Complexes. *J. Am. Chem. Soc.* **2010**, *132*, 14092.

6. Powers, D. C.; Lee, E.; Ariafard, A.; Sanford, M. S.; Yates, B. F.; Canty, A. J.; Ritter, T., Connecting Binuclear Pd(III) and Mononuclear Pd(IV) Chemistry by Pd–Pd Bond Cleavage. *J. Am. Chem. Soc.* **2012**, *134*, 12002.

7. Powers, D. C.; Ritter, T., Bimetallic Redox Synergy in Oxidative Palladium Catalysis. *Acc. Chem. Res.* **2012**, *45*, 840.

8. Thrimurtulu, N.; Dey, A.; Maiti, D.; Volla, C. M., Cobalt-Catalyzed sp<sup>2</sup> C–H Activation: Intermolecular Heterocyclization with Allenes at Room Temperature. *Angew. Chem. Int. Ed.* **2016**, *55*, 12361.

## 19. References

1. Pye, D. R.; Mankad, N. P., Bimetallic catalysis for C–C and C–X coupling reactions. *Chem. Sci.* **2017**, *8*, 1705.
2. Inatomi, T.; Koga, Y.; Matsubara, K., Dinuclear Nickel(I) and Palladium(I) Complexes for Highly Active Transformations of Organic Compounds. *Molecules* **2018**, *23*, 1.
3. Verhoeven, D. G. A.; Negenman, H. A.; Orsino, A. F.; Lutz, M.; Moret, M.-E., Versatile Coordination and C–C Coupling of Diphosphine-Tethered Imine Ligands with Ni(II) and Ni(0). *Inorg. Chem.* **2018**, *57*, 10846.
4. Powers, D. C.; Ritter, T., Bimetallic Pd(III) complexes in palladium-catalysed carbon–heteroatom bond formation. *Nat. Chem.* **2009**, *1*, 302.
